# Supplementary material for: Mechanistic investigation of the transfer hydrogenation of alkynes catalysed by an MLC catalyst with multiple ancillary ligand sites
Source: Royal Society of Chemistry journal article supplement (doi:10.1039/d3qo00575e), 2023-01-01
Supplement: d3qo00575e1.pdf [file d3qo00575e1.pdf]

## Electronic Supplementary Information

### Mechanistic investigation of the transfer hydrogenation of alkyne catalysed by an MLC catalyst with multiple ancillary ligand sites

Yuan Zhang, Lan-Yu Li and Cheng Hou\*

School of Chemistry and Pharmaceutical Sciences, State Key Laboratory for  
Chemistry and Molecular Engineering of Medicinal Resources, Guangxi Normal  
University, Guilin, 541004, P. R. China

*\*Author to whom correspondence should be addressed at:  
houcheng@gxnu.edu.cn*

#### Table of Contents

|                                                                                          |     |
|------------------------------------------------------------------------------------------|-----|
| 1. The comparison of free energy barriers using different functionals.....               | S2  |
| 2. The active site interconversion at different spin states. ....                        | S3  |
| 3. The reaction pathway assisted by the N-H moiety at single and triplet state. ....     | S4  |
| 4. The pathway assisted by the NEt <sub>2</sub> moiety at single and triplet state. .... | S5  |
| 5. The pathway assisted by the hydroxyl group at single and triplet state. ....          | S6  |
| 6. Structural analysis of key intermediates. ....                                        | S7  |
| 7. The origin of the chemo-selectivity. ....                                             | S8  |
| 8. The kinetics of Co(II) → Co(I).....                                                   | S10 |
| 9. The TDI and TDTS of two reaction pathways considering the energetic span model. ....  | S11 |
| 10. The origin of the non-proton-shuttle path preference over proton-shuttle path ....   | S12 |
| 11. The NEt <sub>2</sub> arm dissociation of the Co(II) catalyst precursor ....          | S13 |
| 12. The generation of H <sub>2</sub> from MeOH and BH <sub>3</sub> NH <sub>3</sub> ..... | S14 |
| 13. The DFT calculated energies of all optimized structures. ....                        | S15 |
| 14. The Cartesian coordinates (xyz) for all optimized structures.....                    | S19 |

## 1. The comparison of free energy barriers using different functionals.

**Table S1.** The comparison of free energy barrier using different functionals (kcal/mol).

| <b>Functionals</b> | <b>IM7</b> | <b>TS16</b> | <b>TS22</b> |
|--------------------|------------|-------------|-------------|
| <b>M06-L</b>       | 0.0        | 32.4        | 21.6        |
| <b>M06</b>         | 0.0        | 32.5        | 22.8        |
| <b>B3LYP-D3</b>    | 0.0        | 29.6        | 19.1        |
| <b>PBE1PBE</b>     | 0.0        | 38.4        | 24.2        |

In order to select appropriate functional for our calculation, we compare a series of functionals which are widely used in the computational studies relevant to catalytic hydrogenation and dehydrogenation reaction. The rate-determining transition states and intermediates were calculated using different functionals. The results are shown in Table S1. The relative reaction activation energy calculated by different functionals is basically the same trend. Based on these results, we chose M06-L as the functional considering the computational expense and accuracy.

## 2. The active site interconversion at different spin states.

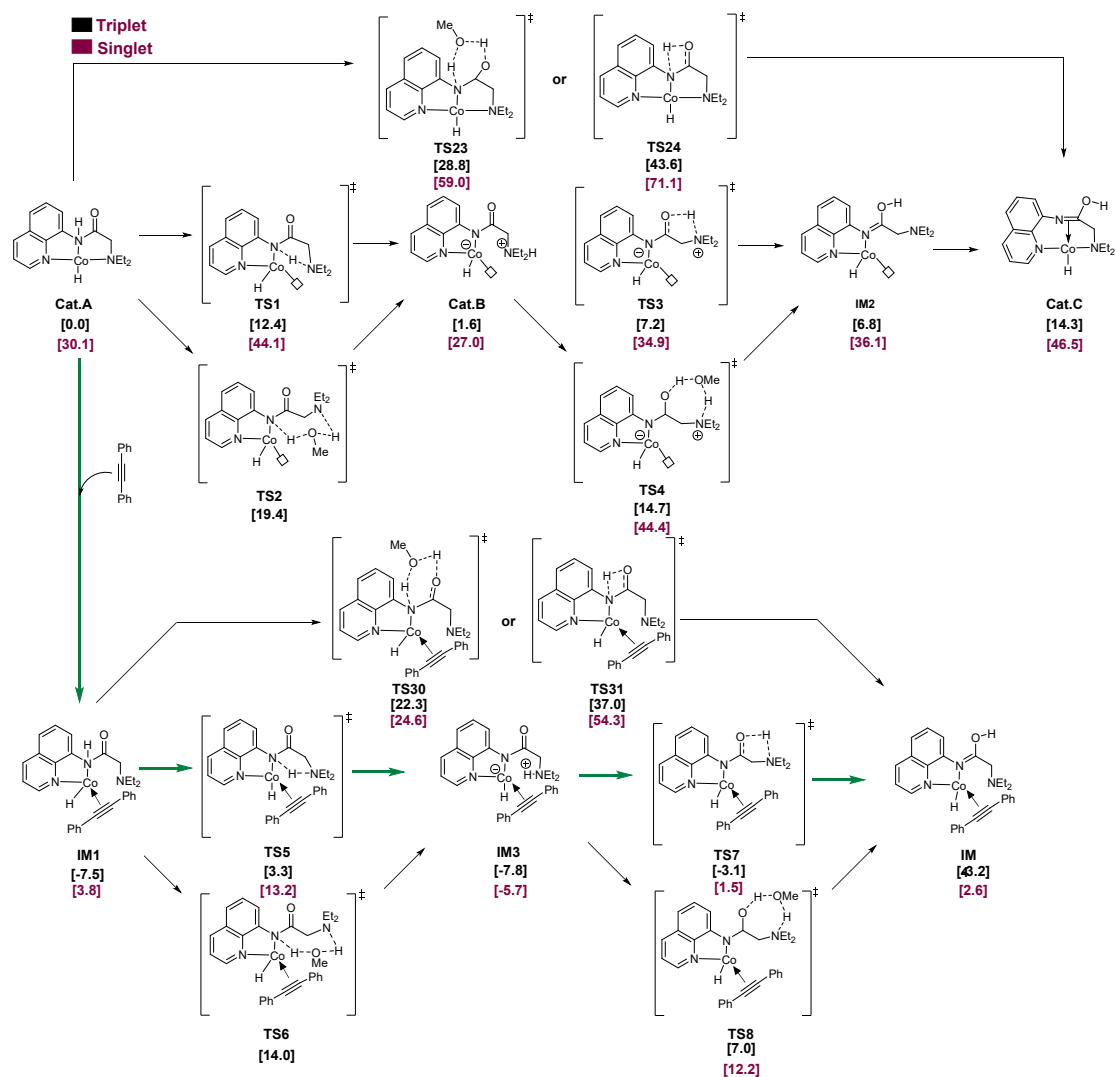

**Figure S1.** The reaction pathways of the active site interconversion under different spin multiplicities. Free energy results are reported in kcal/mol.

### 3. The reaction pathway assisted by the N-H moiety at single and triplet state.

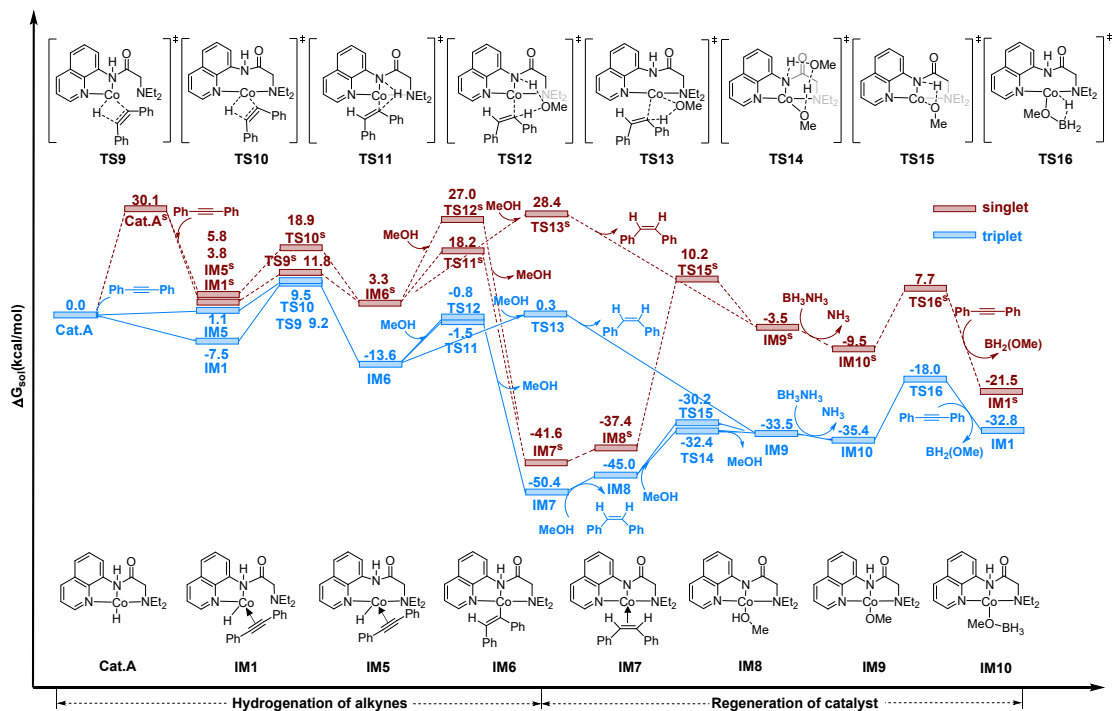

**Figure S2.** The reaction pathway assisted by the N-H moiety in the single/triplet state. Free energy results are reported in kcal/mol.

#### 4. The pathway assisted by the NEt<sub>2</sub> moiety at single and triplet state.

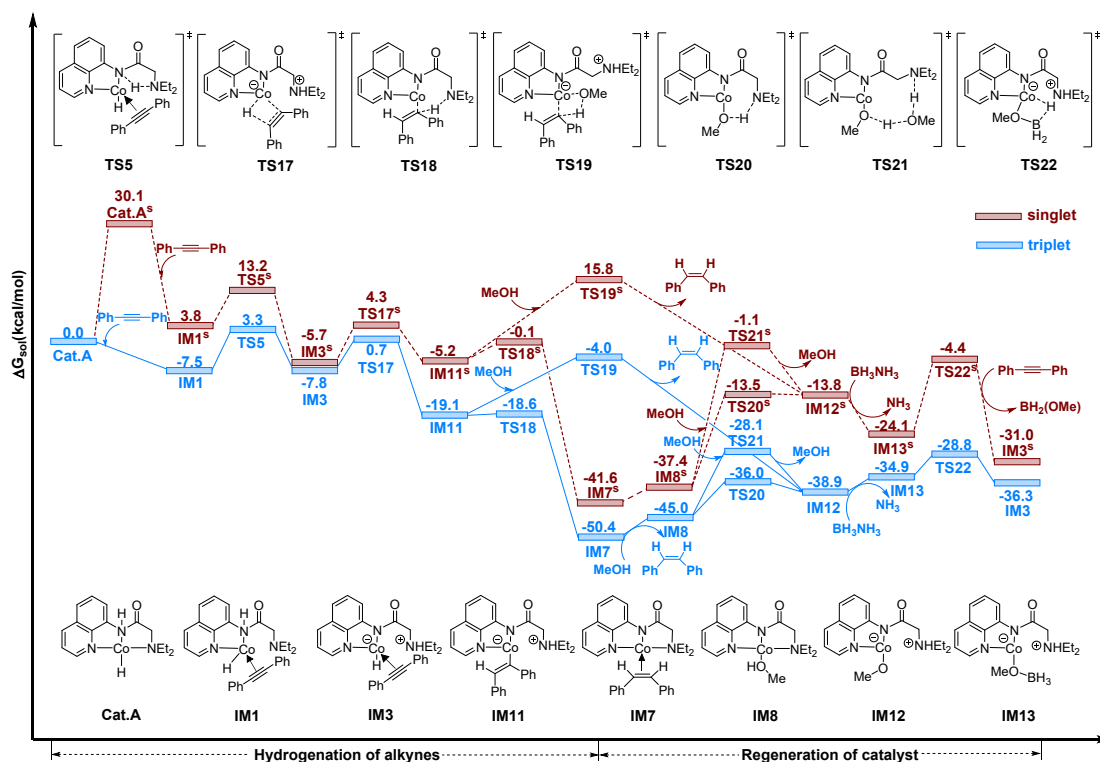

**Figure S3.** The pathway assisted by the NEt<sub>2</sub> moiety in the single/triplet state. Free energy results are reported in kcal/mol.

## 5. The pathway assisted by the hydroxyl group at single and triplet state.

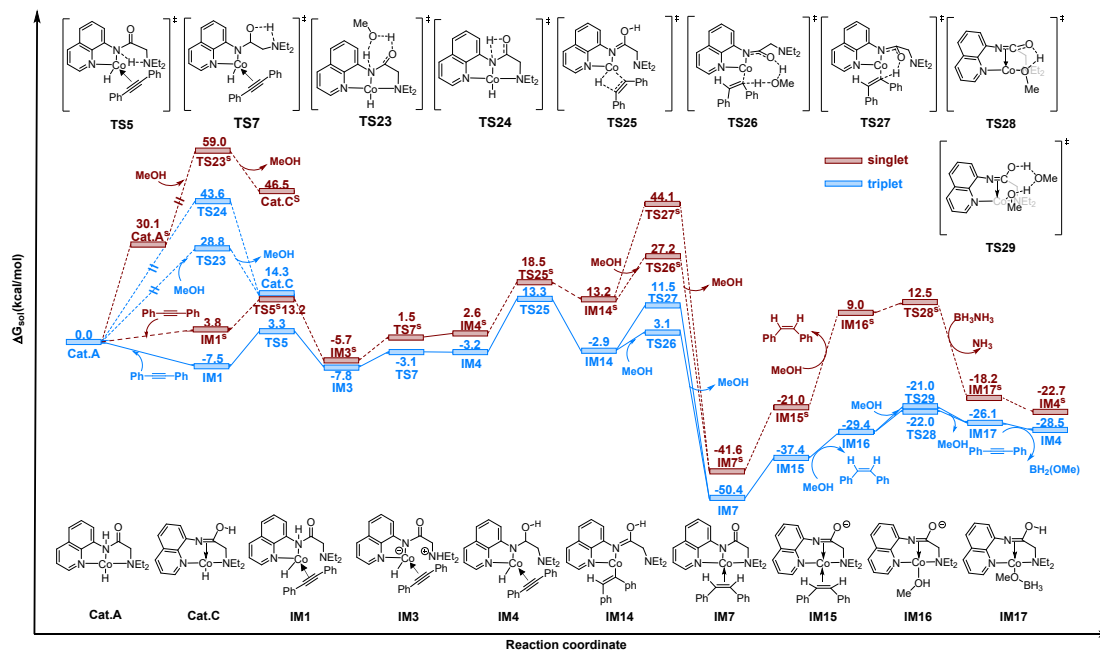

**Figure S4.** The pathway assisted by the hydroxyl group in the single/triplet state. Free energy results are reported in kcal/mol.

## 6. Structural analysis of key intermediates.

M = Mayer bond order  
B = Bond lengths(Å)

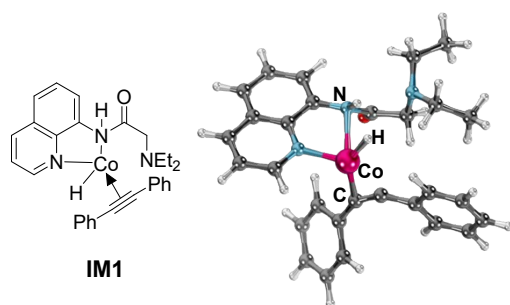

$B_{\text{Co-H}} = 1.61$     $M_{\text{Co-H}} = 0.73$

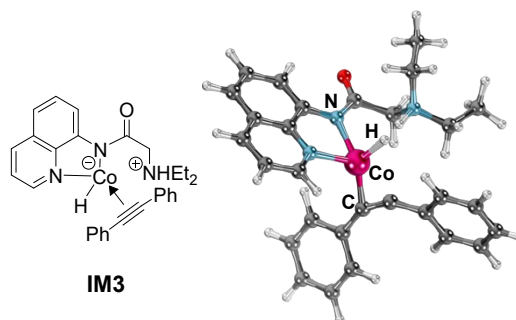

$B_{\text{Co-H}} = 1.66$     $M_{\text{Co-H}} = 0.53$

Figure S5. Structural analysis of IM1 and IM3.

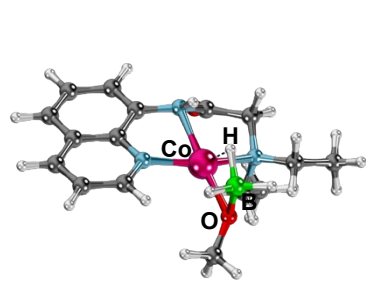

$B_{\text{Co-O}} = 2.05$     $M_{\text{Co-O}} = 0.33$   
 $B_{\text{B-H}} = 1.30$     $M_{\text{B-H}} = 0.59$

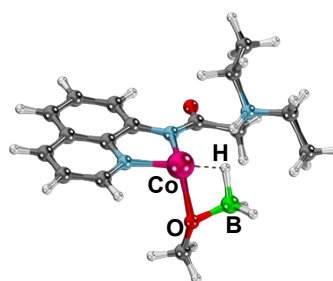

$B_{\text{Co-O}} = 2.07$     $M_{\text{Co-O}} = 0.30$   
 $B_{\text{B-H}} = 1.33$     $M_{\text{B-H}} = 0.53$

Figure S6. Structural analysis of IM10 and IM13.

## 7. The origin of the chemo-selectivity.

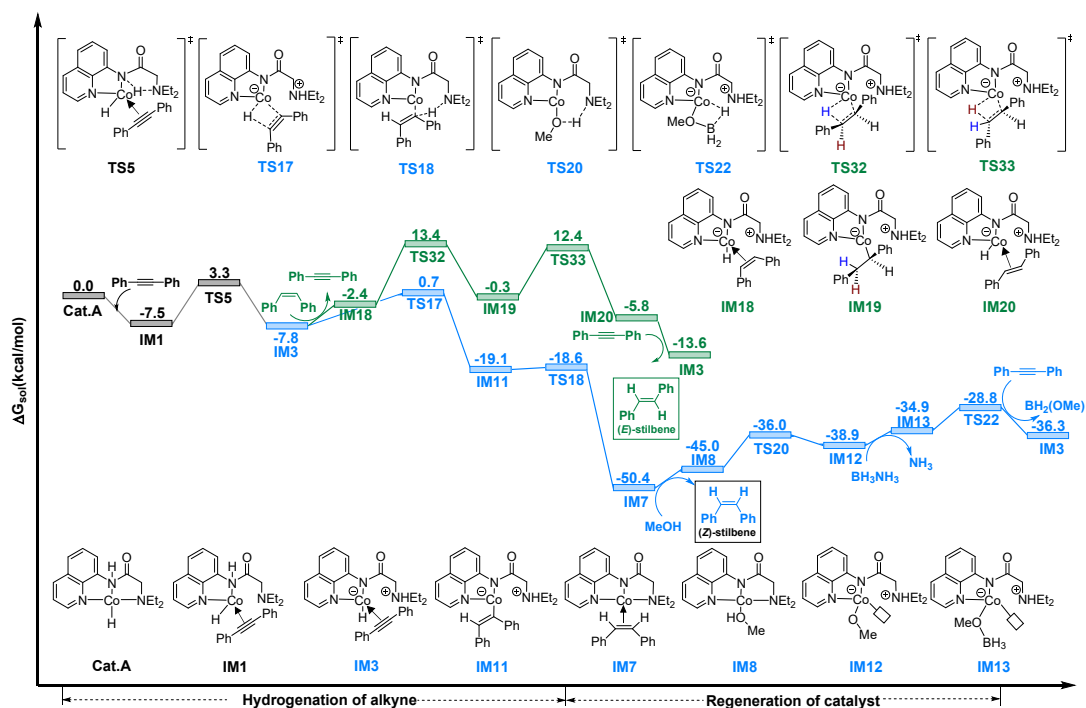

**Figure S7.** The free energy diagram of the competition between the insertion of alkyne and the isomerization from (Z)-stilbene to (E)-stilbene.

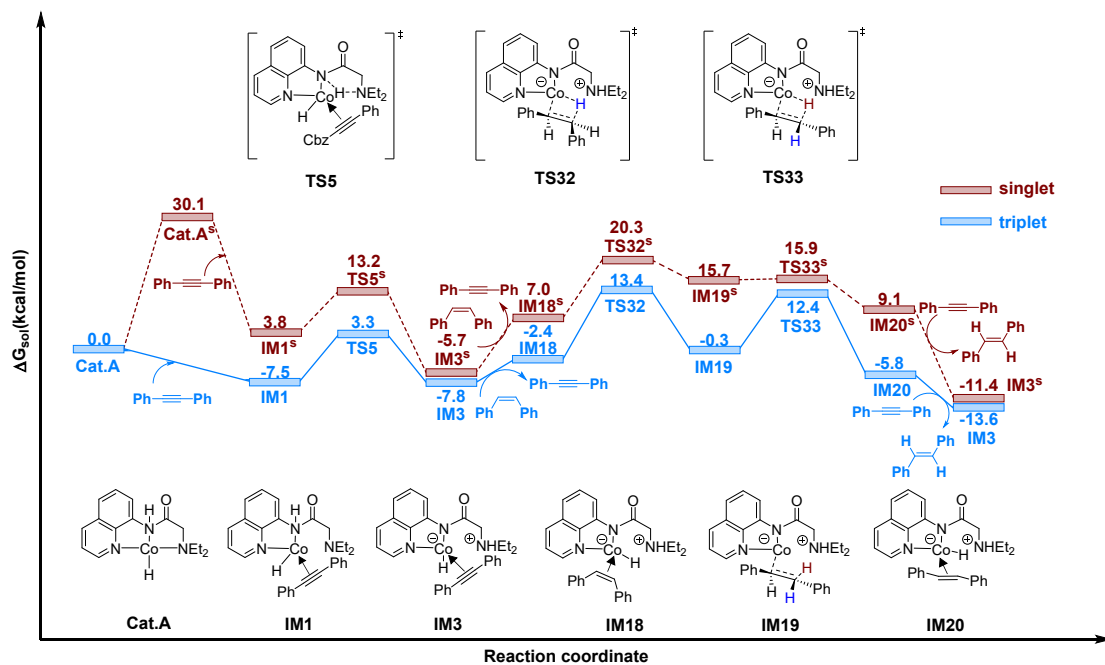

**Figure S8.** The free energy diagram of the isomerization from (Z)-stilbene to (E)-stilbene at singlet and triplet spin states.



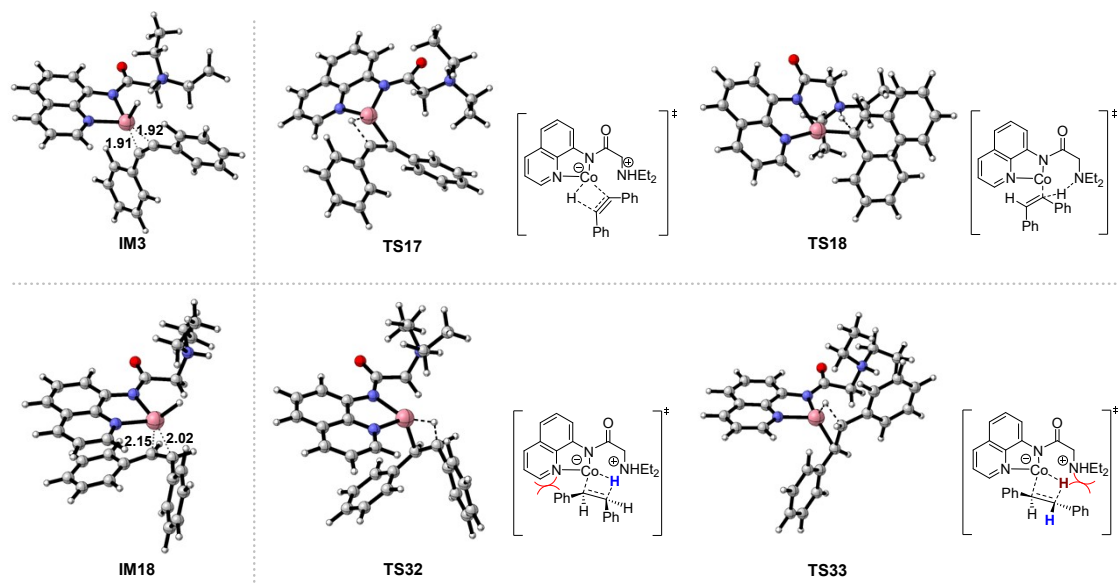

**Figure S9.** The differences in steric repulsion of the key optimized structures and transition states.

## 8. The kinetics of Co(II) $\rightarrow$ Co(I).

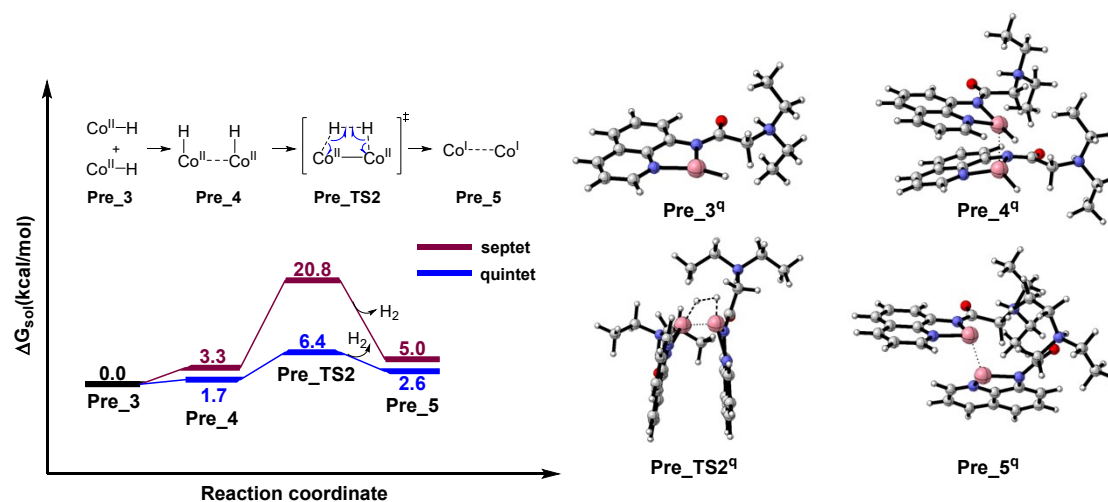

**Figure S9.** The free energy diagram of the reduction of Co(II) center to Co(I) center.

For the reduction of Co(II) center, the Co(II) hydride complex (**Pre\_3**) is usually formed with the aid of  $\text{BH}_3\text{NH}_3$ . Subsequently, two Co(II)-H complexes will form a dimer (**Pre\_4**) and release a molecular of  $\text{H}_2$ . During this process, Co(II) center is reduced to Co(I) via a concerted transition state (**Pre\_TS2**). The transition state at singlet (both closed shell and open shell) and triplet spin states cannot be located by DFT calculation. However, the transition state at septet and quintet spin states were successfully obtained by DFT calculation. The calculated results suggest the transition state at quintet possesses a lower relative activation free energy barrier (6.4 kcal/mol) compared with septet spin state (20.8 kcal/mol). The localized orbital bonding analysis (LOBA) proposed by Head-Gordon et al is performed and further confirmed the oxidation state of Co in **Pre\_5<sup>q</sup>** is +1 after the formation of  $\text{H}_2$ .

**9. The TDI and TDTS of two reaction pathways considering the energetic span model.**

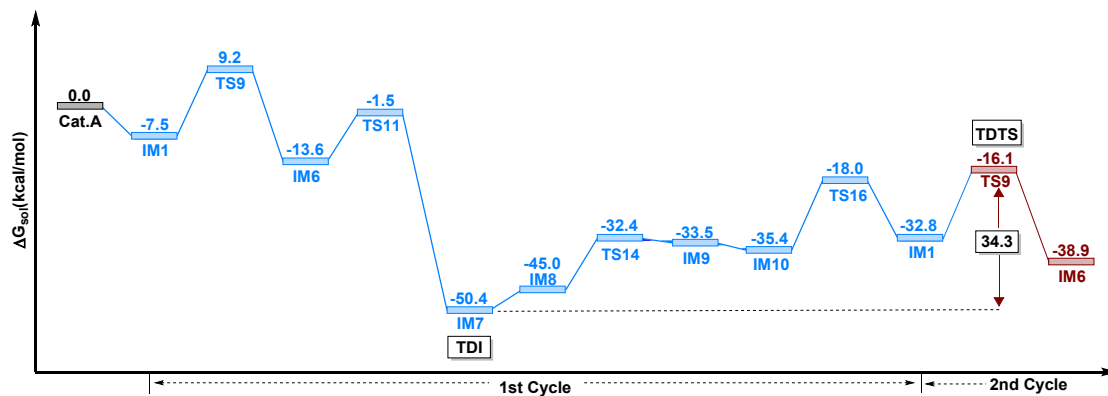

**Figure S10.** The free energy diagram of the transfer hydrogenation alkyne assisted by the amide group considering the energetic span model.

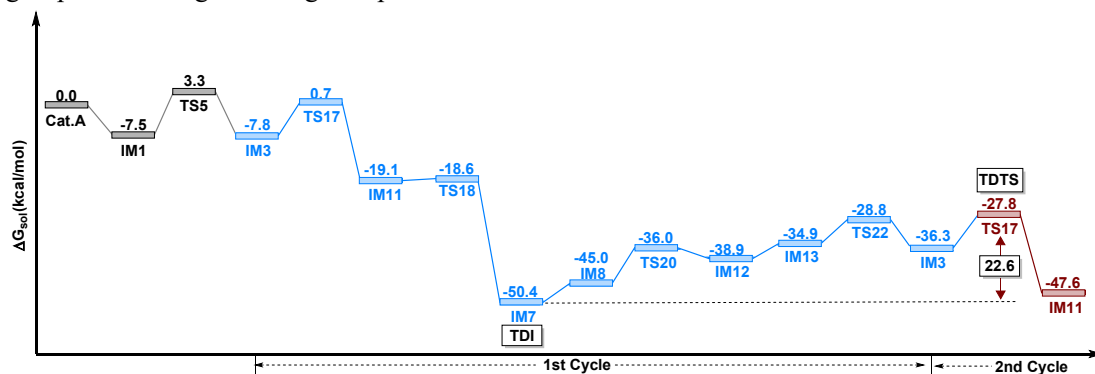

**Figure S11.** The free energy diagram of the transfer hydrogenation alkyne assisted by the  $\text{NEt}_2$  group considering the energetic span model.

## 10. The origin of the non-proton-shuttle path preference over proton-shuttle path

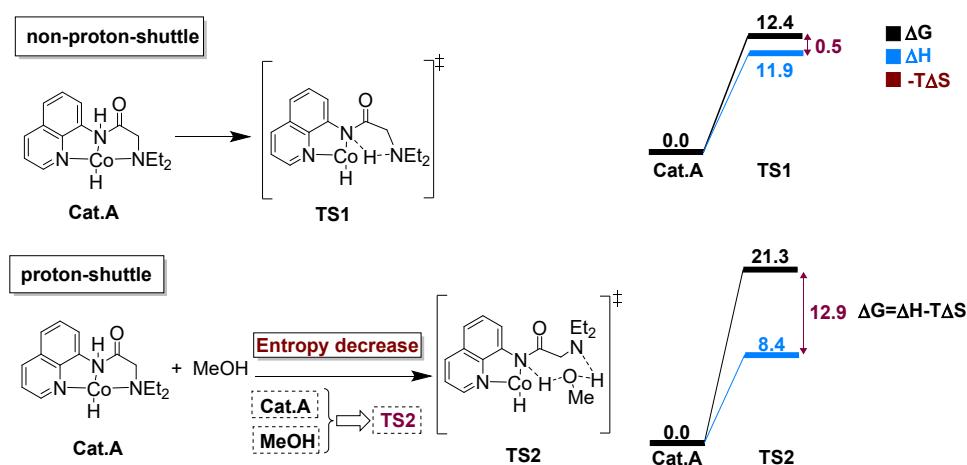

**Figure S12.** The difference in the entropy of non-proton-shuttle path and proton-shuttle path.

The proton-shuttle mechanism exhibits a higher energy barrier in the free energy due to the introduction of an additional MeOH molecule, in which the entropy decreases significantly compared to the non-proton shuttle mechanism. For instance, the  $\Delta H$  of non-proton shuttle (TS2: 8.4 kcal/mol) is lower compared with TS1 (11.9 kcal/mol). However, the free energy of **TS2** (21.3 kcal/mol) is much higher than **TS1** (12.4 kcal/mol) after adding the entropy term,  $-T\Delta S$ , (TS1: 0.5 kcal/mol; TS2: 12.9 kcal/mol).

**Table S2.** The comparison of free energy, enthalpy and entropy in non-proton-shuttle and proton-shuttle transition states.

| □ Proton transfer TSs | $\Delta G^\ddagger$<br>1.9 correction<br>(kcal/mol) | $\Delta G^\ddagger$<br>(kcal/mol) | $\Delta H^\ddagger$<br>(kcal/mol) | $T\Delta S^\ddagger$<br>(kcal/mol) |
|-----------------------|-----------------------------------------------------|-----------------------------------|-----------------------------------|------------------------------------|
| TS1                   | 12.4                                                | 12.4                              | 11.9                              | -0.5                               |
| TS2(proton shuttle)   | 19.4                                                | 21.3                              | 8.4                               | -12.9                              |
| TS3                   | 5.6                                                 | 5.6                               | 5.0                               | -0.6                               |
| TS4(proton shuttle)   | 13.1                                                | 15.0                              | 3.8                               | -11.2                              |
| TS5                   | 10.8                                                | 10.8                              | 9.5                               | -1.3                               |
| TS6(proton shuttle)   | 21.5                                                | 23.4                              | 7.2                               | -16.2                              |
| TS7                   | 4.7                                                 | 4.7                               | 4.3                               | -0.4                               |
| TS8(proton shuttle)   | 14.8                                                | 16.8                              | 3.9                               | -12.9                              |
| TS24                  | 43.6                                                | 43.6                              | 43.0                              | -0.6                               |
| TS23(proton shuttle)  | 28.8                                                | 30.7                              | 16.9                              | -13.8                              |
| TS31                  | 44.5                                                | 44.5                              | 44.8                              | 0.3                                |
| TS30(proton shuttle)  | 29.8                                                | 31.7                              | 18.9                              | -12.8                              |

We also summarized the  $\Delta G$ ,  $\Delta H$  and  $T\Delta S$  of all the proton transfer transition states in the table below. It can be seen the decrease of entropy in proton shuttle mechanism is the origin of the

mechanistic preference toward non-proton shuttle mechanism in most cases. However, for the suprafacial 1,3-H-shift reaction **TS24** and **TS31** with higher barrier both in  $\Delta G$  and  $\Delta H$  due to the orbital symmetry restraint, the proton shuttle mechanism via **TS23** and **TS30** actually decreases the free energy barrier. This results also represent the positive effect of proton shuttle reaction.

## 11. The $\text{NEt}_2$ arm dissociation of the Co(II) catalyst precursor

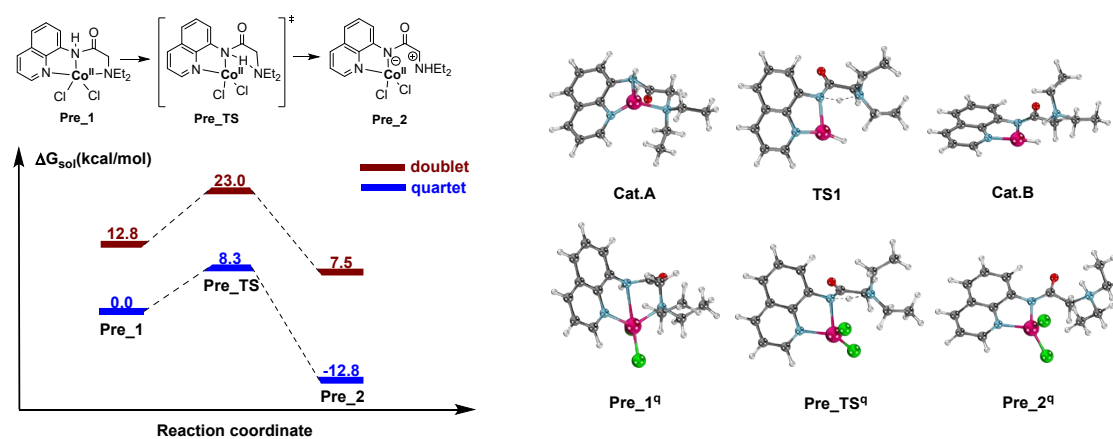

**Figure S13.** The  $\text{NEt}_2$  arm dissociation of the Co(II) catalyst precursor.

We calculated the activation free energy of the  $\text{NEt}_2$  arm dissociation for Co(II) catalyst precursor. The activation free energy barrier is 8.3 kcal/mol for quartet and 23.0 kcal/mol at doublet spin state, which is even lower compared with Co(I) species. The generation of **Pre\_2** is found to be an exothermic reaction, which is consistent with the experimental observation. During the dissociation of  $\text{NEt}_2$  arm, the amide group and quinoline group form a larger stable conjugation system, providing a strong driving force for the dissociation of  $\text{NEt}_2$  arm, which is more likely the origin of the  $\text{NEt}_2$  arm hemilability.

## 12. The generation of H<sub>2</sub> from MeOH and BH<sub>3</sub>NH<sub>3</sub>

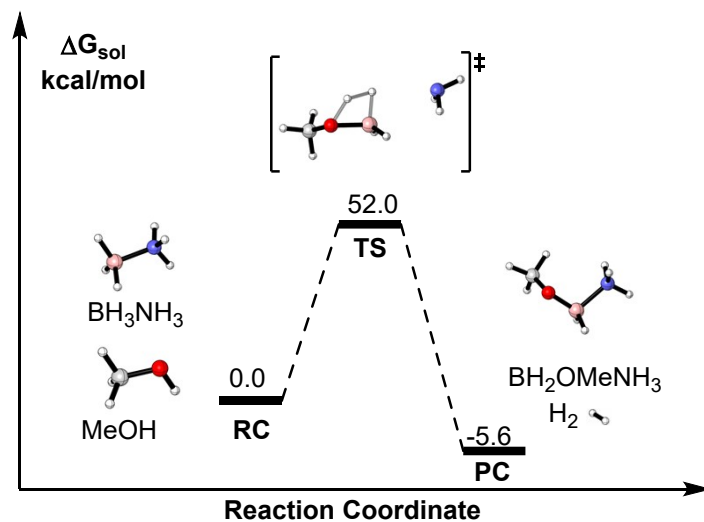

**Figure S14.** The free energy diagram of the H<sub>2</sub> generation from MeOH and BH<sub>3</sub>NH<sub>3</sub>.

We have calculated the formation of H<sub>2</sub> from MeOH and BH<sub>3</sub>NH<sub>3</sub>. The calculated results indicate the activation free energy barrier is 52.0 kcal/mol. Therefore, the activation of H<sub>2</sub> is less likely to happen considering the reaction takes place under room temperature. According to the relevant paper by Jiao and Beweries et al. (*J. Am. Chem. Soc.*, **2016**, 138, 27, 8588–8594; *Inorg. Chem. Front.*, **2022**, 9, 761–770), the formation of B(OMe)<sub>3</sub> is detected as a stable by-product. Therefore, the direct cleavage of the B-N bond of BH<sub>3</sub>NH<sub>3</sub> is feasible experimentally.

### 13. The DFT calculated energies of all optimized structures.

**Table S3.** The DFT calculated energies of all optimized structures

| Species                            | Hc hartree | Gc hartree | H(gas) hartree | G(gas) hartree | Esp + G <sub>SOL</sub> hartree | Final G hartree | <i>i</i> (cm <sup>-1</sup> ) |
|------------------------------------|------------|------------|----------------|----------------|--------------------------------|-----------------|------------------------------|
| MeOH                               | 0.055685   | 0.028759   | -115.557604    | -115.58453     | -115.7557787                   | -115.7239919    |                              |
| 1,2-stilbene                       | 0.227102   | 0.176977   | -540.017941    | -540.068066    | -540.8207519                   | -540.6407471    |                              |
| diphenylethyne                     | 0.203682   | 0.153151   | -538.800517    | -538.851048    | -539.5818257                   | -539.4256468    |                              |
| BH <sub>3</sub> NH <sub>3</sub>    | 0.074707   | 0.047556   | -83.066355     | -83.093505     | -83.25832412                   | -83.20774028    |                              |
| NH <sub>3</sub>                    | 0.03844    | 0.016591   | -56.46404      | -56.485889     | -56.57560129                   | -56.55598245    |                              |
| BH <sub>2</sub> OMe                | 0.068749   | 0.038298   | -141.010141    | -141.040592    | -141.2423065                   | -141.2009806    |                              |
| BH <sub>2</sub> OMeNH <sub>3</sub> | 0.111093   | 0.074958   | -197.49449     | -197.530625    | -197.850675                    | -197.7726891    |                              |
| H <sub>2</sub>                     | 0.013339   | -0.001482  | -1.2           | -1.2           | -1.171247908                   | -1.169702068    |                              |
| ( <i>E</i> )-stilbene              | 0.227105   | 0.176149   | -540.02521     | -540.076166    | -540.8290602                   | -540.6498834    |                              |
| <b>plausible active species</b>    |            |            |                |                |                                |                 |                              |
| Cat.A                              | 0.347516   | 0.278064   | -2204.643707   | -2204.71316    | -2206.097914                   | -2205.816822    |                              |
| TS1                                | 0.344495   | 0.275853   | -2204.614397   | -2204.683039   | -2206.075941                   | -2205.79706     | -1176.54                     |
| TS2                                | 0.402344   | 0.326544   | -2320.195576   | -2320.271377   | -2321.83948                    | -2321.509909    | -724.25                      |
| Cat.B                              | 0.348507   | 0.279393   | -2204.636717   | -2204.70583    | -2206.096738                   | -2205.814318    |                              |
| TS3                                | 0.344382   | 0.276207   | -2204.627432   | -2204.695607   | -2206.084547                   | -2205.805312    | -1309.93                     |
| TS4                                | 0.399433   | 0.321282   | -2320.201305   | -2320.279456   | -2321.841762                   | -2321.517452    | -1102.77                     |
| IM2                                | 0.348214   | 0.278661   | -2204.633197   | -2204.70275    | -2206.087647                   | -2205.805958    |                              |
| Cat.C                              | 0.347344   | 0.27847    | -2204.626626   | -2204.695501   | -2206.075542                   | -2205.794044    |                              |
| IM1                                | 0.553645   | 0.452466   | -2743.489611   | -2743.59079    | -2745.709894                   | -2745.2544      |                              |
| TS5                                | 0.549557   | 0.450458   | -2743.470381   | -2743.569479   | -2745.690756                   | -2745.23727     | -1205.87                     |
| TS6                                | 0.606671   | 0.504413   | -2859.04951    | -2859.151768   | -2861.451564                   | -2860.944123    | -1020.51                     |
| IM3                                | 0.554077   | 0.45421    | -2743.495983   | -2743.595851   | -2745.712177                   | -2745.254939    |                              |
| TS7                                | 0.550072   | 0.450792   | -2743.486378   | -2743.585658   | -2745.701236                   | -2745.247416    | -1221.67                     |
| TS8                                | 0.605123   | 0.498856   | -2859.060499   | -2859.166766   | -2861.457158                   | -2860.955275    | -974.33                      |
| IM4                                | 0.553884   | 0.453544   | -2743.490316   | -2743.590655   | -2745.70414                    | -2745.247569    |                              |
| TS23                               | 0.400153   | 0.325726   | -2320.199233   | -2320.27366    | -2321.823643                   | -2321.494889    | -1329.79                     |
| TS24                               | 0.34237    | 0.273767   | -2204.578885   | -2204.647488   | -2206.024197                   | -2205.747402    | -1773.30                     |
| TS30                               | 0.604482   | 0.496782   | -2859.030742   | -2859.138443   | -2861.430754                   | -2860.930945    | -1328.45                     |
| TS31                               | 0.548501   | 0.446809   | -2743.418666   | -2743.520358   | -2745.633354                   | -2745.183517    | -1746.46                     |
| <b>N-H moiety</b>                  |            |            |                |                |                                |                 |                              |
| IM5                                | 0.554305   | 0.456782   | -2743.489587   | -2743.58711    | -2745.700492                   | -2745.240682    |                              |
| TS9                                | 0.553213   | 0.456121   | -2743.47676    | -2743.573851   | -2745.687008                   | -2745.227859    | -768.83                      |
| TS10                               | 0.553636   | 0.457719   | -2743.482892   | -2743.57881    | -2745.688059                   | -2745.227312    | -630.67                      |
| IM6                                | 0.55785    | 0.460585   | -2743.513421   | -2743.610686   | -2745.727768                   | -2745.264156    |                              |
| TS11                               | 0.553      | 0.456455   | -2743.499065   | -2743.595609   | -2745.704284                   | -2745.244801    | -1096.19                     |
| TS12                               | 0.609112   | 0.502911   | -2859.079022   | -2859.185223   | -2861.473633                   | -2860.967694    | -1523.96                     |
| IM7                                | 0.558872   | 0.463229   | -2743.577846   | -2743.67349    | -2745.788964                   | -2745.322707    |                              |
| IM8                                | 0.386786   | 0.309705   | -2319.088839   | -2319.16592    | -2320.710189                   | -2320.397456    |                              |

| Species                                 | Hc<br>hartree | Gc<br>hartree | H(gas)<br>hartree | G(gas)<br>hartree | Esp + G <sub>SOL</sub><br>hartree | Final G<br>hartree | <i>i</i> (cm <sup>-1</sup> ) |
|-----------------------------------------|---------------|---------------|-------------------|-------------------|-----------------------------------|--------------------|------------------------------|
| TS13                                    | 0.60955       | 0.505327      | -2859.082668      | -2859.186891      | -2861.474259                      | -2860.965904       | -1426.64                     |
| TS14                                    | 0.437759      | 0.353119      | -2434.663341      | -2434.747981      | -2436.457562                      | -2436.101416       | -942.80                      |
| TS15                                    | 0.38128       | 0.306521      | -2319.077444      | -2319.152203      | -2320.68336                       | -2320.373812       | -1342.78                     |
| IM9                                     | 0.38594       | 0.308598      | -2319.079036      | -2319.156377      | -2320.690761                      | -2320.379135       |                              |
| IM10                                    | 0.421273      | 0.341959      | -2345.703698      | -2345.783012      | -2347.37892                       | -2347.033933       |                              |
| TS16                                    | 0.417537      | 0.338886      | -2345.677912      | -2345.756563      | -2347.348007                      | -2347.006093       | -393.88                      |
| <b>NEt<sub>2</sub> moiety</b>           |               |               |                   |                   |                                   |                    |                              |
| TS17                                    | 0.553157      | 0.454147      | -2743.477189      | -2743.576199      | -2745.69848                       | -2745.241305       | -595.35                      |
| IM11                                    | 0.55841       | 0.460651      | -2743.507862      | -2743.605621      | -2745.736647                      | -2745.272968       |                              |
| TS18                                    | 0.552986      | 0.455016      | -2743.509824      | -2743.607794      | -2745.730146                      | -2745.272102       | -1122.61                     |
| TS19                                    | 0.610294      | 0.504886      | -2859.074339      | -2859.179748      | -2861.480823                      | -2860.972909       | -1211.21                     |
| TS20                                    | 0.383874      | 0.308388      | -2319.074632      | -2319.150118      | -2320.694544                      | -2320.383128       | -961.98                      |
| TS21                                    | 0.438296      | 0.353103      | -2434.650459      | -2434.735652      | -2436.450589                      | -2436.094458       | -1284.04                     |
| IM12                                    | 0.386831      | 0.309443      | -2319.074987      | -2319.152376      | -2320.700143                      | -2320.387672       |                              |
| IM13                                    | 0.422592      | 0.341462      | -2345.69122       | -2345.77235       | -2347.377613                      | -2347.033123       |                              |
| TS22                                    | 0.418486      | 0.339135      | -2345.687659      | -2345.767009      | -2347.365483                      | -2347.02332        | -282.59                      |
| <b>O-site</b>                           |               |               |                   |                   |                                   |                    |                              |
| TS25                                    | 0.551823      | 0.45199       | -2743.465984      | -2743.565818      | -2745.676275                      | -2745.221257       | -647.16                      |
| IM14                                    | 0.561112      | 0.462438      | -2743.488205      | -2743.586879      | -2745.712484                      | -2745.247018       |                              |
| TS26                                    | 0.606396      | 0.499802      | -2859.065996      | -2859.17259       | -2861.464289                      | -2860.961459       | -1261.75                     |
| TS27                                    | 0.554178      | 0.457424      | -2743.463887      | -2743.560641      | -2745.684572                      | -2745.22412        | -162.24                      |
| IM15                                    | 0.558357      | 0.462934      | -2743.55377       | -2743.649194      | -2745.768023                      | -2745.302062       |                              |
| IM16                                    | 0.386636      | 0.311474      | -2319.07362       | -2319.148782      | -2320.687105                      | -2320.372603       |                              |
| TS28                                    | 0.381722      | 0.307179      | -2319.068811      | -2319.143355      | -2320.671034                      | -2320.360827       | -552.87                      |
| TS29                                    | 0.437984      | 0.355364      | -2434.653565      | -2434.736185      | -2436.441506                      | -2436.083115       | -878.78                      |
| IM17                                    | 0.420712      | 0.340798      | -2345.691428      | -2345.771342      | -2347.36285                       | -2347.019024       |                              |
| IM18                                    | 0.577683      | 0.479723      | -2744.685555      | -2744.783515      | -2746.944159                      | -2746.461408       |                              |
| TS32                                    | 0.577178      | 0.48001       | -2744.656256      | -2744.753425      | -2746.919331                      | -2746.436293       | -820.08                      |
| IM19                                    | 0.582757      | 0.486728      | -2744.693848      | -2744.789878      | -2746.947765                      | -2746.458009       |                              |
| TS33                                    | 0.577176      | 0.480658      | -2744.671026      | -2744.767544      | -2746.921572                      | -2746.437886       | -843.08                      |
| IM20                                    | 0.578103      | 0.480372      | -2744.700158      | -2744.797889      | -2746.950176                      | -2746.466776       |                              |
| <b>plausible active species-singlet</b> |               |               |                   |                   |                                   |                    |                              |
| Cat.A <sup>S</sup>                      | 0.349385      | 0.283013      | -2204.60686       | -2204.673233      | -2206.054818                      | -2205.768778       |                              |
| TS1 <sup>S</sup>                        | 0.344128      | 0.275967      | -2204.565225      | -2204.633387      | -2206.025506                      | -2205.746511       | -937.68                      |
| Cat.B <sup>S</sup>                      | 0.348825      | 0.282315      | -2204.594747      | -2204.661256      | -2206.059185                      | -2205.773842       |                              |
| TS3 <sup>S</sup>                        | 0.345391      | 0.278066      | -2204.580691      | -2204.648015      | -2206.042305                      | -2205.761211       | -1340.81                     |
| TS4 <sup>S</sup>                        | 0.400342      | 0.325307      | -2320.155535      | -2320.23057       | -2321.798344                      | -2321.470009       | -1095.23                     |
| IM2 <sup>S</sup>                        | 0.349003      | 0.281415      | -2204.586096      | -2204.653683      | -2206.04381                       | -2205.759367       |                              |
| Cat.C <sup>S</sup>                      | 0.348308      | 0.282657      | -2204.582023      | -2204.647675      | -2206.028442                      | -2205.742757       |                              |
| IM1 <sup>S</sup>                        | 0.554329      | 0.455934      | -2743.481376      | -2743.579771      | -2745.695315                      | -2745.236353       |                              |
| TS5 <sup>S</sup>                        | 0.551259      | 0.458375      | -2743.469615      | -2743.5625        | -2745.682905                      | -2745.221502       | -1002.39                     |
| IM3 <sup>S</sup>                        | 0.555808      | 0.458894      | -2743.487133      | -2743.584047      | -2745.713415                      | -2745.251493       |                              |
| TS7 <sup>S</sup>                        | 0.551325      | 0.454996      | -2743.484377      | -2743.580706      | -2745.698114                      | -2745.24009        | -1221.14                     |
| TS8 <sup>S</sup>                        | 0.60639       | 0.502518      | -2859.055518      | -2859.159389      | -2861.452494                      | -2860.946948       | -992.20                      |



| Species                               | Hc<br>hartree | Gc<br>hartree | H(gas)<br>hartree | G(gas)<br>hartree | Esp + G <sub>SOL</sub><br>hartree | Final G<br>hartree | <i>i</i> (cm <sup>-1</sup> ) |
|---------------------------------------|---------------|---------------|-------------------|-------------------|-----------------------------------|--------------------|------------------------------|
| IM4 <sup>S</sup>                      | 0.555069      | 0.457813      | -2743.487983      | -2743.585239      | -2745.699225                      | -2745.238384       |                              |
| TS23 <sup>S</sup>                     | 0.399338      | 0.32729       | -2320.150688      | -2320.222737      | -2321.777158                      | -2321.44684        | -1345.73                     |
| TS24 <sup>S</sup>                     | 0.342518      | 0.278252      | -2204.543978      | -2204.608244      | -2205.984841                      | -2205.703561       | -1724.16                     |
| TS30 <sup>S</sup>                     | 0.607102      | 0.504413      | -2859.040405      | -2859.143094      | -2861.434769                      | -2860.927328       | -1408.10                     |
| TS31 <sup>S</sup>                     | 0.548349      | 0.452012      | -2743.411         | -2743.507337      | -2745.610949                      | -2745.155909       | -1657.76                     |
| <b>N-H moiety-singlet</b>             |               |               |                   |                   |                                   |                    |                              |
| IM5 <sup>S</sup>                      | 0.555376      | 0.460131      | -2743.486         | -2743.58108       | -2745.696388                      | -2745.23323        |                              |
| TS9 <sup>S</sup>                      | 0.552777      | 0.455709      | -2743.47          | -2743.567163      | -2745.682463                      | -2745.223726       | -259.21                      |
| TS10 <sup>S</sup>                     | 0.553991      | 0.46127       | -2743.468         | -2743.56098       | -2745.676627                      | -2745.212329       | -704.97                      |
| IM6 <sup>S</sup>                      | 0.557419      | 0.464236      | -2743.498         | -2743.590712      | -2745.704478                      | -2745.237214       |                              |
| TS11 <sup>S</sup>                     | 0.552239      | 0.460442      | -2743.479         | -2743.570645      | -2745.676921                      | -2745.213451       | -985.56                      |
| TS12 <sup>S</sup>                     | 0.608165      | 0.505372      | -2859.038         | -2859.141137      | -2861.431842                      | -2860.923442       | -1215.28                     |
| TS13 <sup>S</sup>                     | 0.610151      | 0.510999      | -2859.044         | -2859.143312      | -2861.43515                       | -2860.921123       | -1473.92                     |
| IM7 <sup>S</sup>                      | 0.558976      | 0.46859       | -2743.57          | -2743.660693      | -2745.780396                      | -2745.308778       |                              |
| IM8 <sup>S</sup>                      | 0.387654      | 0.314452      | -2319.08          | -2319.152969      | -2320.70281                       | -2320.38533        |                              |
| TS15 <sup>S</sup>                     | 0.379451      | 0.308213      | -2319.026         | -2319.097649      | -2320.620683                      | -2320.309442       | -1349.654                    |
| IM9 <sup>S</sup>                      | 0.386494      | 0.313718      | -2319.039         | -2319.111311      | -2320.647999                      | -2320.331253       |                              |
| IM10 <sup>S</sup>                     | 0.422367      | 0.346935      | -2345.671         | -2345.746007      | -2347.342505                      | -2346.992542       |                              |
| TS16 <sup>S</sup>                     | 0.417637      | 0.342836      | -2345.648         | -2345.722324      | -2347.311111                      | -2346.965247       | -364.43                      |
| <b>NEt<sub>2</sub> moiety-singlet</b> |               |               |                   |                   |                                   |                    |                              |
| TS17 <sup>S</sup>                     | 0.555079      | 0.461748      | -2743.478         | -2743.570925      | -2745.700384                      | -2745.235608       | -766.89                      |
| IM11 <sup>S</sup>                     | 0.558557      | 0.462176      | -2743.495         | -2743.591149      | -2745.716035                      | -2745.250831       |                              |
| TS18 <sup>S</sup>                     | 0.552947      | 0.460029      | -2743.496         | -2743.589314      | -2745.705651                      | -2745.242595       | -1147.29                     |
| TS19 <sup>S</sup>                     | 0.610029      | 0.507615      | -2859.044         | -2859.146465      | -2861.451899                      | -2860.941256       | -1430.81                     |
| TS20 <sup>S</sup>                     | 0.382953      | 0.309411      | -2319.038         | -2319.111774      | -2320.659734                      | -2320.347295       | -1094.59                     |
| TS21 <sup>S</sup>                     | 0.438915      | 0.356816      | -2434.611         | -2434.693336      | -2436.411262                      | -2436.051418       | -1216.69                     |
| IM12 <sup>S</sup>                     | 0.387472      | 0.312673      | -2319.036         | -2319.110481      | -2320.663367                      | -2320.347666       |                              |
| IM13 <sup>S</sup>                     | 0.423425      | 0.348941      | -2345.685         | -2345.759678      | -2347.36777                       | -2347.015802       |                              |
| TS22 <sup>S</sup>                     | 0.420059      | 0.344961      | -2345.656         | -2345.7309        | -2347.332504                      | -2346.984515       | -274.90                      |
| <b>O-site-singlet</b>                 |               |               |                   |                   |                                   |                    |                              |
| TS25 <sup>S</sup>                     | 0.553292      | 0.457549      | -2743.462159      | -2743.557903      | -2745.673589                      | -2745.213012       | -556.63                      |
| IM14 <sup>S</sup>                     | 0.557434      | 0.460918      | -2743.47167       | -2743.568186      | -2745.685415                      | -2745.221469       |                              |
| TS26 <sup>S</sup>                     | 0.607356      | 0.504412      | -2859.032785      | -2859.135728      | -2861.430525                      | -2860.923085       | -1017.13                     |
| TS27 <sup>S</sup>                     | 0.551437      | 0.455782      | -2743.419137      | -2743.514793      | -2745.631006                      | -2745.172196       | -1759.62                     |
| IM15 <sup>S</sup>                     | 0.558534      | 0.469188      | -2743.543576      | -2743.632923      | -2745.748189                      | -2745.275973       |                              |
| IM16 <sup>S</sup>                     | 0.384817      | 0.314355      | -2319.024288      | -2319.09475       | -2320.62872                       | -2320.311337       |                              |
| TS28 <sup>S</sup>                     | 0.3805        | 0.310517      | -2319.021792      | -2319.091775      | -2320.619384                      | -2320.30584        | -950.50                      |
| IM17 <sup>S</sup>                     | 0.421556      | 0.345542      | -2345.683399      | -2345.759414      | -2347.355095                      | -2347.006525       |                              |
| IM18 <sup>S</sup>                     | 0.579246      | 0.486162      | -2744.68435       | -2744.777434      | -2746.935529                      | -2746.446339       |                              |
| TS32 <sup>S</sup>                     | 0.577717      | 0.482506      | -2744.656965      | -2744.752176      | -2746.910772                      | -2746.425238       | -598.68                      |
| IM19 <sup>S</sup>                     | 0.580394      | 0.48524       | -2744.664479      | -2744.759632      | -2746.920798                      | -2746.43253        |                              |
| TS33 <sup>S</sup>                     | 0.578198      | 0.483837      | -2744.666552      | -2744.760913      | -2746.919105                      | -2746.43224        | -410.39                      |
| IM20 <sup>S</sup>                     | 0.579632      | 0.486629      | -2744.685175      | -2744.778178      | -2746.932802                      | -2746.443146       |                              |
| Species                               | Hc            | Gc            | H(gas)            | G(gas)            | Esp + G <sub>SOL</sub>            | Final G            | <i>i</i> (cm <sup>-1</sup> ) |

|                      | hartree  | hartree  | hartree      | hartree      | hartree      | hartree      |         |
|----------------------|----------|----------|--------------|--------------|--------------|--------------|---------|
| SI                   |          |          |              |              |              |              |         |
| Pre_1 <sup>q</sup>   | 0.349572 | 0.272624 | -3124.328665 | -3124.405612 | -3126.072234 | -3125.79961  |         |
| Pre_TS <sup>q</sup>  | 0.345207 | 0.268362 | -3124.312394 | -3124.389239 | -3126.054794 | -3125.786432 | -999.09 |
| Pre_2 <sup>q</sup>   | 0.35044  | 0.271312 | -3124.333475 | -3124.412603 | -3126.091415 | -3125.820103 |         |
| Pre_1 <sup>d</sup>   | 0.349542 | 0.275423 | -3124.30607  | -3124.380189 | -3126.054614 | -3125.779191 |         |
| Pre_TS <sup>d</sup>  | 0.344862 | 0.269923 | -3124.286852 | -3124.361792 | -3126.032949 | -3125.763026 | -903.65 |
| Pre_2 <sup>d</sup>   | 0.351073 | 0.276404 | -3124.31609  | -3124.390759 | -3126.063993 | -3125.787589 |         |
| Pre_3                | 0.351675 | 0.279514 | -2204.457325 | -2204.529486 | -2205.989586 | -2205.710072 |         |
| Pre_4 <sup>q</sup>   | 0.705465 | 0.590805 | -4408.913619 | -4409.028278 | -4412.005241 | -4411.414436 |         |
| Pre_TS2 <sup>q</sup> | 0.70614  | 0.593985 | -4408.912152 | -4409.024307 | -4412.000944 | -4411.406959 | -417.62 |
| Pre_5 <sup>q</sup>   | 0.69061  | 0.575132 | -4407.718025 | -4407.833503 | -4410.818331 | -4410.243199 |         |
| Pre_4 <sup>s</sup>   | 0.70678  | 0.595625 | -4408.911215 | -4409.022371 | -4412.007458 | -4411.411833 |         |
| Pre_TS2 <sup>s</sup> | 0.704796 | 0.594236 | -4408.885047 | -4408.995608 | -4411.978163 | -4411.383927 | -664.49 |
| Pre_5 <sup>s</sup>   | 0.691004 | 0.574267 | -4407.723568 | -4407.840305 | -4410.813648 | -4410.239381 |         |
| TS                   | 0.125904 | 0.082353 | -198.5729    | -198.616452  | -198.9427422 | -198.8603892 | -1497.9 |

- The  $H_C$  and  $G_C$  designate the thermal correction of Enthalpy and Gibbs Free Energy at the M06-L/def2-SVP level.
- The  $H(\text{gas})$  and  $G(\text{gas})$  designate Enthalpy and Gibbs Free Energy in the gas phase at the M06-L/def2-SVP level.
- The  $E_{SP} + G_{SOL}$  designates the sum of single point energy at the M06-L/def2-TZVP level and the solvation free energy calculated by SMD continuum solvent mode.
- The **Final G** designates the sum of  $E_{SP} + G_{SOL}$  and  $G_C$ .
- The  $i$  designates the imaginary frequency of transition states.

| 14. | The                             | Cartesian   | coordinates | (xyz)              | for         | all         | optimized   | structures  |             |             |             |
|-----|---------------------------------|-------------|-------------|--------------------|-------------|-------------|-------------|-------------|-------------|-------------|-------------|
|     | BH <sub>2</sub> OMe             |             |             |                    |             |             |             |             |             |             |             |
|     |                                 |             |             |                    |             | C           | 0.00000000  | 0.61057000  | 0.00000100  |             |             |
|     |                                 |             |             |                    |             | C           | 0.00000000  | -0.61057000 | 0.00000100  |             |             |
| B   | 1.28955100                      | 0.21288400  | 0.00006000  | MeOH               |             | C           | 0.00000000  | 2.03457500  | 0.00000000  |             |             |
| H   | 1.27362700                      | 1.42182700  | -0.00037000 |                    |             | C           | -0.85718800 | 2.75321100  | 0.85585300  |             |             |
| H   | 2.30515300                      | -0.42635700 | 0.00038900  | C                  | -0.64930300 | -0.01952100 | 0.00000000  | C           | 0.85718800  | 2.75321000  | -0.85585300 |
| O   | 0.14126500                      | -0.47543400 | -0.00010800 | H                  | -1.04052500 | -0.54301500 | 0.89217500  | C           | -0.85371700 | 4.14396000  | 0.85240000  |
| C   | -1.12355600                     | 0.14245800  | 0.00004800  | H                  | -1.04052600 | -0.54300600 | -0.89217900 | H           | -1.52454500 | 2.20294200  | 1.52218600  |
| H   | -1.68505200                     | -0.17525900 | 0.88897100  | H                  | -1.08655600 | 0.98731900  | 0.00000500  | C           | 0.85371800  | 4.14395900  | -0.85240100 |
| H   | -1.04463500                     | 1.24074200  | -0.00071700 | O                  | 0.74189000  | 0.12189800  | 0.00000000  | H           | 1.52454600  | 2.20294000  | -1.52218300 |
| H   | -1.68563800                     | -0.17665200 | -0.88799900 | H                  | 1.12830200  | -0.75935400 | 0.00000000  | C           | 0.00000000  | 4.84483400  | -0.00000100 |
|     |                                 |             |             |                    |             |             |             | H           | -1.52460500 | 4.68673500  | 1.52226100  |
|     |                                 |             |             |                    |             |             |             | H           | 1.52460500  | 4.68673400  | -1.52226200 |
|     | BH <sub>3</sub> NH <sub>3</sub> |             |             | NH <sub>3</sub>    |             |             |             | H           | 0.00000100  | 5.93708200  | -0.00000100 |
|     |                                 |             |             |                    |             |             |             | C           | 0.00000000  | -2.03457500 | 0.00000000  |
| H   | 0.94290400                      | 0.70585000  | -1.23809300 | N                  | 0.00000000  | 0.00000000  | 0.12586800  | C           | 0.85718800  | -2.75321100 | 0.85585300  |
| H   | -1.08273600                     | 0.46365400  | -1.23809300 | H                  | 0.00000000  | 0.92936500  | -0.29369200 | C           | -0.85718800 | -2.75321000 | -0.85585300 |
| H   | 0.13983200                      | -1.16950300 | -1.23809300 | H                  | -0.80485400 | -0.46468300 | -0.29369200 | C           | 0.85371700  | -4.14396000 | 0.85240000  |
| H   | -0.11196000                     | 0.93981000  | 1.09972100  | H                  | 0.80485400  | -0.46468300 | -0.29369200 | H           | 1.52454500  | -2.20294200 | 1.52218600  |
| H   | -0.75791900                     | -0.56686500 | 1.09972100  |                    |             |             |             | C           | -0.85371800 | -4.14395900 | -0.85240100 |
| H   | 0.86987900                      | -0.37294500 | 1.09972100  |                    |             |             |             | H           | -1.52454600 | -2.20294000 | -1.52218300 |
| B   | 0.00000000                      | 0.00000000  | -0.92549000 | 1,2-diphenylethyne |             |             |             | C           | 0.00000000  | -4.84483400 | -0.00000100 |
| N   | 0.00000000                      | 0.00000000  | 0.72036700  |                    |             |             |             | H           | 1.52460500  | -4.68673500 | 1.52226100  |

|              |             |             |             |       |             |             |             |       |             |             |             |
|--------------|-------------|-------------|-------------|-------|-------------|-------------|-------------|-------|-------------|-------------|-------------|
| H            | -1.52460500 | -4.68673400 | -1.52226200 | C     | 2.29766100  | -1.44629000 | -0.89105600 | 1     | -0.32886200 | 3.02973800  | -0.06986000 |
| H            | -0.00000100 | -5.93708200 | -0.00000100 | H     | 0.41099200  | -0.51590200 | -1.34983400 | 6     | -1.88253300 | 0.10176500  | -0.10713000 |
|              |             |             |             | C     | 3.52258300  | -1.33272000 | -0.22985200 | 6     | 0.60004700  | -1.73079500 | 0.64309500  |
|              |             |             |             | H     | 4.76681200  | -0.07035300 | 1.00477300  | 6     | 2.07708000  | -1.60528100 | 0.30815900  |
| 1,2-stilbene |             |             |             | H     | 2.07614100  | -2.33908900 | -1.48078100 | 1     | 2.66304700  | -2.04719700 | 1.13339000  |
|              |             |             |             | H     | 4.25767100  | -2.13841600 | -0.29127900 | 1     | 2.32483800  | -2.14416100 | -0.61988700 |
| C            | -0.67565400 | 1.86019400  | -0.00390300 |       |             |             |             | 6     | 2.32216300  | 0.58295400  | 1.35874900  |
| C            | 0.67564100  | 1.86019300  | 0.00388000  |       |             |             |             | 1     | 3.09050500  | 0.21750300  | 2.06918600  |
| H            | 1.15233600  | 2.84642500  | 0.05347800  | Cat.A |             |             |             | 1     | 1.35350500  | 0.36348900  | 1.82985400  |
| H            | -1.15233300 | 2.84643300  | -0.05350300 | 27    | 0.72791300  | 0.42952900  | -1.21026800 | 6     | 2.45846400  | 2.06659500  | 1.12179200  |
| C            | -1.61982600 | 0.74190800  | 0.07055200  | 7     | -0.23705200 | -1.65120800 | -0.45642700 | 1     | 3.48158600  | 2.37089500  | 0.86056100  |
| C            | -2.87036200 | 0.85258900  | -0.56245900 | 7     | -0.85045700 | 1.02186800  | -0.21047500 | 1     | 2.16445200  | 2.63432800  | 2.01349000  |
| C            | -1.35869700 | -0.42387100 | 0.81412000  | 7     | 2.37458700  | -0.17941200 | 0.09758800  | 1     | 1.79654000  | 2.37142400  | 0.29455000  |
| C            | -3.80645700 | -0.17599100 | -0.49454400 | 6     | -1.60072700 | -1.27649400 | -0.28330000 | 6     | 3.62492600  | 0.01467300  | -0.66261700 |
| H            | -3.10173200 | 1.76255000  | -1.12350200 | 6     | -2.60584000 | -2.22943800 | -0.21646700 | 1     | 3.66838900  | 1.07325700  | -0.96015800 |
| C            | -2.29762200 | -1.44630700 | 0.89103100  | 1     | -2.34466900 | -3.28212300 | -0.33701100 | 1     | 3.49732900  | -0.53300500 | -1.60878000 |
| H            | -0.41094500 | -0.51590900 | 1.34975600  | 6     | -3.92993900 | -1.83549000 | 0.02331800  | 6     | 4.89512700  | -0.39864300 | 0.04817200  |
| C            | -3.52256600 | -1.33274300 | 0.22986700  | 1     | -4.71880400 | -2.58904400 | 0.06885400  | 1     | 5.08708000  | 0.19948900  | 0.95063700  |
| H            | -4.76684800 | -0.07037100 | -1.00469900 | 6     | -4.23298300 | -0.50082900 | 0.21820800  | 1     | 5.75982600  | -0.26548100 | -0.61485700 |
| H            | -2.07607100 | -2.33911500 | 1.48073300  | 1     | -5.26215200 | -0.19044700 | 0.41576500  | 1     | 4.87911800  | -1.45686500 | 0.34713100  |
| H            | -4.25764100 | -2.13845000 | 0.29130100  | 6     | -3.22938300 | 0.49612100  | 0.16677900  | 8     | 0.18706000  | -1.78105500 | 1.78094700  |
| C            | 1.61981000  | 0.74190100  | -0.07055900 | 6     | -3.49513700 | 1.87476500  | 0.36823800  | 1     | 0.17111400  | -1.66390100 | -1.40099000 |
| C            | 2.87032500  | 0.85258900  | 0.56249300  | 1     | -4.51459100 | 2.20305300  | 0.58080300  | 1     | 1.28317800  | 0.23148500  | -2.71775800 |
| C            | 1.35872100  | -0.42386600 | -0.81415700 | 6     | -2.44295700 | 2.77590800  | 0.29454200  |       |             |             |             |
| C            | 3.80643700  | -0.17597700 | 0.49458800  | 1     | -2.60333100 | 3.84376800  | 0.45398000  |       |             |             |             |
| H            | 3.10166300  | 1.76254300  | 1.12355900  | 6     | -1.15960300 | 2.32188700  | 0.00612400  | Cat.B |             |             |             |

|    |             |             |             |       |             |             |             |   |             |             |             |
|----|-------------|-------------|-------------|-------|-------------|-------------|-------------|---|-------------|-------------|-------------|
| 27 | -0.04106900 | -1.62794800 | 0.30904400  | 1     | -4.26140100 | -1.62993400 | -1.12228200 | 6 | -3.83253600 | -0.49402400 | 1.16557800  |
| 7  | -0.08027300 | 0.43928100  | 0.49120600  | 6     | -5.19557600 | -0.60998300 | 0.54536200  | 1 | -4.78717900 | -0.15168100 | 1.57161000  |
| 1  | -1.97891300 | -1.16014800 | -0.29652400 | 1     | -4.99812100 | -0.35029900 | 1.59309600  | 6 | -3.06788900 | 0.39009200  | 0.36988600  |
| 7  | 1.85200000  | -1.28817400 | 0.02573500  | 1     | -6.03141800 | -1.32114400 | 0.54766300  | 6 | -3.45459600 | 1.72078400  | 0.06320800  |
| 7  | -2.78972900 | -0.41254100 | -0.28618500 | 1     | -5.54143700 | 0.29576800  | 0.03105900  | 1 | -4.39940300 | 2.10994100  | 0.44964300  |
| 6  | 1.17882800  | 0.99490000  | 0.28915800  | 6     | -2.69471100 | 0.35793300  | -1.55735700 | 6 | -2.62701000 | 2.50053200  | -0.72370900 |
| 6  | 1.53319300  | 2.34862200  | 0.30696100  | 1     | -2.95966100 | -0.34608800 | -2.35966000 | 1 | -2.89711200 | 3.52681700  | -0.97910000 |
| 1  | 0.76307500  | 3.09006000  | 0.50336400  | 1     | -1.62451700 | 0.58425300  | -1.67904800 | 6 | -1.42199500 | 1.97255500  | -1.20311800 |
| 6  | 2.86238100  | 2.74506800  | 0.07725300  | 6     | -3.52093300 | 1.61708400  | -1.60799300 | 1 | -0.75499900 | 2.57610000  | -1.82676800 |
| 1  | 3.09904900  | 3.81227400  | 0.09817400  | 1     | -4.60029700 | 1.42211500  | -1.55310900 | 6 | -1.82545400 | -0.06875200 | -0.16051500 |
| 6  | 3.86647500  | 1.83023000  | -0.16946800 | 1     | -3.33579500 | 2.13020200  | -2.56005600 | 6 | 1.00626100  | -1.61107600 | -0.03966800 |
| 1  | 4.89564000  | 2.15165600  | -0.34670900 | 1     | -3.23722600 | 2.31472000  | -0.80803000 | 6 | 1.35931800  | -0.59947100 | 1.01915000  |
| 6  | 3.56155200  | 0.44925200  | -0.19336300 | 1     | -1.39741800 | -2.52007900 | 0.19670600  | 1 | 2.05014200  | -1.01356700 | 1.77663900  |
| 6  | 4.52783900  | -0.56135500 | -0.43333700 | 8     | -1.27054300 | 2.42653100  | 0.82840800  | 1 | 0.44144700  | -0.29404400 | 1.54299800  |
| 1  | 5.56771200  | -0.27654600 | -0.61135600 |       |             |             |             | 6 | 3.29968700  | 0.44133600  | -0.13234100 |
| 6  | 4.13882600  | -1.88722700 | -0.43528000 |       |             |             |             | 1 | 3.31372400  | -0.17379600 | -1.04702600 |
| 1  | 4.85844200  | -2.68822600 | -0.61461300 | Cat.C |             |             |             | 1 | 3.60547100  | 1.44935600  | -0.45340400 |
| 6  | 2.79705300  | -2.20975800 | -0.20296900 | 27    | 0.67337300  | -0.12086500 | -1.53330700 | 6 | 4.27939900  | -0.12646700 | 0.87434400  |
| 1  | 2.46367100  | -3.25227800 | -0.20211500 | 7     | -0.19848200 | -1.84644400 | -0.51047800 | 1 | 4.10126000  | -1.19596900 | 1.05233700  |
| 6  | 2.21598400  | 0.03873300  | 0.03561000  | 7     | -1.01402500 | 0.72439700  | -0.93650600 | 1 | 5.30003600  | -0.04359300 | 0.47730400  |
| 6  | -1.16305700 | 1.20213200  | 0.74183500  | 7     | 1.88851600  | 0.56281600  | 0.29384300  | 1 | 4.26299100  | 0.38694700  | 1.84584700  |
| 6  | -2.44116700 | 0.37070900  | 0.92832500  | 6     | -1.36761400 | -1.38923300 | 0.09962900  | 6 | 1.52850900  | 1.85427700  | 0.87966700  |
| 1  | -2.31477200 | -0.37568000 | 1.73008900  | 6     | -2.15449400 | -2.22759900 | 0.88599000  | 1 | 1.71216400  | 2.62224900  | 0.10931300  |
| 1  | -3.26506000 | 1.04721400  | 1.18309600  | 1     | -1.81089400 | -3.24691200 | 1.07237100  | 1 | 0.43680100  | 1.84576900  | 1.03177000  |
| 6  | -4.00742500 | -1.25679500 | -0.11983000 | 6     | -3.37404200 | -1.77475200 | 1.41557000  | 6 | 2.22727900  | 2.23292300  | 2.17009200  |
| 1  | -3.65790600 | -2.13272600 | 0.45407800  | 1     | -3.96968600 | -2.45344600 | 2.03068900  | 1 | 3.30510900  | 2.39210600  | 2.02714000  |

|     |             |             |             |   |             |             |             |     |             |             |             |
|-----|-------------|-------------|-------------|---|-------------|-------------|-------------|-----|-------------|-------------|-------------|
| 1   | 1.81360400  | 3.16868600  | 2.57038300  | 6 | 2.78798800  | -0.94421900 | 0.74871500  | 6   | -4.88025900 | 1.25413700  | 1.66569300  |
| 1   | 2.10081300  | 1.46325300  | 2.94629200  | 6 | 0.00006200  | -1.66638400 | -1.37759800 | 6   | -4.73767600 | 2.44773200  | -0.42834200 |
| 1   | 1.71870800  | -0.49894200 | -2.71984000 | 6 | -1.50349400 | -1.75107000 | -1.19068300 | 6   | -5.50556500 | 1.93125000  | 0.61723400  |
| 8   | 2.04022400  | -2.41378500 | -0.36860800 | 1 | -1.83812800 | -0.74041000 | -0.89710500 | 6   | 0.65402800  | 2.66887900  | -0.71879500 |
| 1   | 1.77314100  | -2.90778400 | -1.16064000 | 1 | -1.93897600 | -1.93884100 | -2.19306900 | 6   | 0.34432700  | 4.04132200  | -0.80984400 |
|     |             |             |             | 6 | -3.08246000 | -2.34383300 | 0.58987200  | 6   | 1.76732300  | 2.18629500  | -1.43460900 |
|     |             |             |             | 1 | -2.82593100 | -1.49355900 | 1.24670000  | 6   | 1.12328000  | 4.89453000  | -1.58465000 |
| IM1 |             |             |             | 1 | -3.28878900 | -3.19027100 | 1.26487900  | 6   | 2.52958700  | 3.04082200  | -2.22422400 |
| 27  | 0.06547900  | 0.25938900  | 1.25519900  | 6 | -4.32247700 | -1.99235800 | -0.21526700 | 6   | 2.21647700  | 4.39905100  | -2.29791900 |
| 7   | 0.69105000  | -1.77135800 | -0.17885100 | 1 | -4.16317600 | -1.09253400 | -0.82909800 | 1   | -2.99271700 | 0.54183000  | 2.46963800  |
| 7   | 2.08354200  | 0.00791300  | 1.43254700  | 1 | -5.16267900 | -1.76359400 | 0.45566100  | 1   | -2.75023000 | 2.69935100  | -1.24032400 |
| 7   | -1.88160500 | -2.68236400 | -0.16180900 | 1 | -4.64521300 | -2.79936100 | -0.88827300 | 1   | -5.47730900 | 0.84881500  | 2.48667100  |
| 6   | 2.09039300  | -1.83897400 | -0.11089000 | 6 | -1.68448900 | -4.07851300 | -0.50916200 | 1   | -5.22188400 | 2.97684900  | -1.25288900 |
| 6   | 2.81071800  | -2.72138800 | -0.90043200 | 1 | -1.67832400 | -4.66285600 | 0.42699100  | 1   | -6.59098700 | 2.05629400  | 0.61365300  |
| 1   | 2.26960700  | -3.37484500 | -1.58570700 | 1 | -0.66039400 | -4.17485800 | -0.91519500 | 1   | -0.51612600 | 4.42693500  | -0.25660400 |
| 6   | 4.21354800  | -2.78062300 | -0.82393900 | 6 | -2.67077400 | -4.69870700 | -1.48633500 | 1   | 2.00774900  | 1.12025200  | -1.38093900 |
| 1   | 4.75155200  | -3.49216600 | -1.45352900 | 1 | -3.67643500 | -4.78458100 | -1.05153100 | 1   | 0.87147900  | 5.95670500  | -1.63907800 |
| 6   | 4.90683000  | -1.96443100 | 0.04387100  | 1 | -2.35451100 | -5.71213600 | -1.77078100 | 1   | 3.37831400  | 2.64369900  | -2.78623700 |
| 1   | 5.99536300  | -2.01779600 | 0.11735800  | 1 | -2.75674600 | -4.11297100 | -2.41342600 | 1   | 2.82160200  | 5.07041100  | -2.91158000 |
| 6   | 4.21311300  | -1.02582500 | 0.84305400  | 1 | -0.86940200 | -0.72861600 | 2.11056800  | 1   | 0.10604700  | -2.00798000 | 0.63695500  |
| 6   | 4.86590200  | -0.12937700 | 1.72252500  | 8 | 0.54388600  | -1.47598300 | -2.44371400 |     |             |             |             |
| 1   | 5.95279100  | -0.17900300 | 1.82446400  | 6 | -1.27755900 | 1.43745300  | 0.61322500  |     |             |             |             |
| 6   | 4.12847100  | 0.80259800  | 2.41752300  | 6 | -0.13472900 | 1.78188100  | 0.09769700  | IM2 |             |             |             |
| 1   | 4.60204500  | 1.51687200  | 3.09196000  | 6 | -2.71294600 | 1.60567000  | 0.62444800  | 27  | -0.41921700 | -1.86225000 | -0.38253600 |
| 6   | 2.73883700  | 0.85079700  | 2.22297000  | 6 | -3.49931300 | 1.08469500  | 1.66648800  | 8   | 1.65296400  | 1.63918600  | 0.57604200  |
| 1   | 2.13454300  | 1.61805200  | 2.71663200  | 6 | -3.35465600 | 2.29448000  | -0.42406400 | 7   | 0.07409300  | 0.21882100  | -0.37138300 |

|   |             |             |             |     |             |             |             |   |             |             |             |
|---|-------------|-------------|-------------|-----|-------------|-------------|-------------|---|-------------|-------------|-------------|
| 7 | -2.20442700 | -1.10394600 | -0.27930500 | 1   | 2.76668700  | -1.96456700 | 2.84742400  | 6 | 4.32878300  | 1.09823400  | 2.59579400  |
| 7 | 3.62908100  | 0.01180300  | 0.18379000  | 1   | 1.72521700  | -1.61760800 | 1.46636600  | 1 | 5.31151100  | 1.32851100  | 3.01610400  |
| 6 | -1.06072500 | 0.98939400  | -0.07904400 | 6   | 4.85467300  | 0.24592100  | -0.57672600 | 6 | 3.17671500  | 1.56535400  | 3.19136800  |
| 6 | -1.09744800 | 2.36994600  | 0.12270400  | 1   | 5.05879300  | -0.59439300 | -1.27313800 | 1 | 3.21165500  | 2.17446600  | 4.09608200  |
| 1 | -0.17483200 | 2.94660200  | 0.10934600  | 1   | 5.68593000  | 0.23750600  | 0.14539000  | 6 | 1.93691800  | 1.25267100  | 2.60841000  |
| 6 | -2.32278500 | 3.02174000  | 0.33196600  | 6   | 4.84757800  | 1.56156000  | -1.31971600 | 1 | 1.00064400  | 1.61611500  | 3.04431000  |
| 1 | -2.32642600 | 4.10329600  | 0.48634100  | 1   | 4.04125100  | 1.62174300  | -2.06495700 | 6 | 2.94604300  | 0.03037200  | 0.91084300  |
| 6 | -3.51475700 | 2.32231200  | 0.34493100  | 1   | 5.79039800  | 1.70896800  | -1.86220300 | 6 | 1.10708600  | -1.80958700 | -1.64872200 |
| 1 | -4.46364300 | 2.83798100  | 0.51161600  | 1   | 4.72326000  | 2.40906000  | -0.63011200 | 6 | -0.41194600 | -2.00466300 | -1.74827600 |
| 6 | -3.52463600 | 0.92289300  | 0.13741500  | 1   | 0.77137800  | -2.95589400 | -0.38090900 | 1 | -0.91776300 | -1.03607000 | -1.88949400 |
| 6 | -4.70797600 | 0.14005200  | 0.11357700  | 1   | 2.62934400  | 1.48148100  | 0.71193600  | 1 | -0.63873900 | -2.65819500 | -2.60060000 |
| 1 | -5.67581700 | 0.62136800  | 0.27015700  |     |             |             |             | 6 | -2.45963300 | -2.61638200 | -0.47024600 |
| 6 | -4.60876200 | -1.22301800 | -0.11884300 |     |             |             |             | 1 | -2.77811000 | -1.59224900 | -0.71780300 |
| 1 | -5.49829000 | -1.85460700 | -0.15499400 | IM3 |             |             |             | 1 | -2.73894900 | -2.76943700 | 0.58387600  |
| 6 | -3.35507500 | -1.80319600 | -0.31074300 | 27  | 0.06138100  | 0.09903400  | 0.49786100  | 6 | -3.11961100 | -3.63071100 | -1.36704300 |
| 1 | -3.25502500 | -2.87708700 | -0.49466200 | 7   | 1.44702000  | -0.99210800 | -0.62995200 | 1 | -2.80380200 | -3.53645800 | -2.41525100 |
| 6 | -2.28179900 | 0.25604900  | -0.07036700 | 7   | 1.82625900  | 0.51527300  | 1.51450200  | 1 | -4.20608100 | -3.47899900 | -1.34313700 |
| 6 | 1.28966200  | 0.57091200  | -0.11766200 | 7   | -0.97238100 | -2.58739200 | -0.50032400 | 1 | -2.93313200 | -4.66309800 | -1.04280900 |
| 6 | 2.45080300  | -0.23490100 | -0.64051300 | 6   | 2.76471800  | -0.78010800 | -0.26443900 | 6 | -0.29777500 | -3.84802400 | -0.06403900 |
| 1 | 2.14826000  | -1.29746700 | -0.70848600 | 6   | 3.91667700  | -1.26269300 | -0.89432900 | 1 | -0.92807400 | -4.26791400 | 0.73393700  |
| 1 | 2.63712500  | 0.09985700  | -1.67417400 | 1   | 3.80772800  | -1.86894400 | -1.78989200 | 1 | 0.63631400  | -3.52215100 | 0.42025500  |
| 6 | 3.80082300  | -1.02020100 | 1.21307600  | 6   | 5.19603900  | -0.97391100 | -0.38300700 | 6 | -0.00609200 | -4.85155700 | -1.15286800 |
| 1 | 4.65389100  | -0.71357200 | 1.84049500  | 1   | 6.06685700  | -1.37392800 | -0.90928400 | 1 | -0.90661100 | -5.20210500 | -1.67249900 |
| 1 | 4.09269100  | -1.98288600 | 0.74281600  | 6   | 5.38027200  | -0.21016400 | 0.75051500  | 1 | 0.47253800  | -5.73094000 | -0.70342900 |
| 6 | 2.56786400  | -1.22531300 | 2.06121800  | 1   | 6.37936100  | 0.00380800  | 1.13700800  | 1 | 0.69235700  | -4.44739400 | -1.89754600 |
| 1 | 2.24909700  | -0.29417400 | 2.55252500  | 6   | 4.24946900  | 0.30924300  | 1.42377100  | 1 | -0.45398300 | -1.14610100 | 1.45444300  |

|   |             |             |             |     |             |             |             |  |    |             |             |             |
|---|-------------|-------------|-------------|-----|-------------|-------------|-------------|--|----|-------------|-------------|-------------|
| 8 | 1.82590800  | -2.41235900 | -2.44695500 |     |             |             |             |  | 6  | 3.60095200  | -2.91953100 | -0.36616000 |
| 6 | -1.70935200 | 0.85916700  | 0.50177600  |     |             |             |             |  | 1  | 4.39980200  | -3.57183400 | 0.02287500  |
| 6 | -0.91134000 | 1.57852300  | -0.22751300 | IM4 |             |             |             |  | 1  | 4.10024600  | -2.18442600 | -1.03294900 |
| 6 | -3.04543600 | 0.58868100  | 0.97382400  | 8   | 0.65993000  | -3.10074900 | 1.41333100  |  | 6  | 2.60333800  | -3.73311100 | -1.15748900 |
| 6 | -3.27754600 | -0.21864000 | 2.10337300  | 7   | -0.48114900 | -1.55880300 | 0.08771000  |  | 1  | 2.11133500  | -4.49548700 | -0.53628300 |
| 6 | -4.16267000 | 1.10443900  | 0.28382300  | 7   | -2.35033200 | -0.21853500 | -1.18722300 |  | 1  | 3.10797600  | -4.25454300 | -1.98086500 |
| 6 | -4.57319600 | -0.49252700 | 2.52973500  | 7   | 3.00702000  | -2.22768300 | 0.78351200  |  | 1  | 1.82105300  | -3.10655000 | -1.61334400 |
| 6 | -5.45688000 | 0.81523100  | 0.70514800  | 6   | -1.77410600 | -2.03345200 | 0.26578800  |  | 6  | 4.02335400  | -1.53459100 | 1.57819700  |
| 6 | -5.66966500 | 0.01754500  | 1.83127400  | 6   | -2.19146200 | -3.11815100 | 1.03557700  |  | 1  | 4.43992800  | -0.67410900 | 1.01305000  |
| 6 | -0.65205000 | 2.75166400  | -1.02321300 | 1   | -1.45626900 | -3.71193500 | 1.57324000  |  | 1  | 4.85889600  | -2.23965500 | 1.71257700  |
| 6 | -1.57947700 | 3.81166100  | -1.09284300 | 6   | -3.55583400 | -3.45087000 | 1.13206900  |  | 6  | 3.51954700  | -1.08261400 | 2.92825000  |
| 6 | 0.55167800  | 2.87031500  | -1.74463300 | 1   | -3.84465400 | -4.30842000 | 1.74419600  |  | 1  | 2.72809300  | -0.32330900 | 2.85163800  |
| 6 | -1.31036200 | 4.94070700  | -1.85885600 | 6   | -4.52521400 | -2.71564700 | 0.48369200  |  | 1  | 4.33204200  | -0.62974900 | 3.51097900  |
| 6 | 0.81209000  | 3.99668300  | -2.51791800 | 1   | -5.58299000 | -2.97308300 | 0.57441300  |  | 1  | 3.11880600  | -1.92526400 | 3.51082400  |
| 6 | -0.11699400 | 5.03653200  | -2.57808800 | 6   | -4.15216900 | -1.60425700 | -0.30880100 |  | 1  | 1.64780500  | -3.18921000 | 1.55572200  |
| 1 | -2.40951900 | -0.62929200 | 2.62702100  | 6   | -5.08417300 | -0.78237900 | -0.98915700 |  | 27 | -0.33166400 | 0.14187400  | -1.29557700 |
| 1 | -3.99779200 | 1.72506100  | -0.60119500 | 1   | -6.15089800 | -1.00703200 | -0.91139700 |  | 1  | 0.70330100  | -0.61748700 | -2.28103800 |
| 1 | -4.73237700 | -1.11299200 | 3.41556000  | 6   | -4.63459000 | 0.28950200  | -1.72833000 |  | 6  | 0.92304300  | 1.52046500  | -0.82332600 |
| 1 | -6.30897100 | 1.21795300  | 0.15161000  | 1   | -5.32702400 | 0.94727200  | -2.25547000 |  | 6  | -0.22496900 | 1.81863400  | -0.30120000 |
| 1 | -6.68646200 | -0.20381400 | 2.16401900  | 6   | -3.25334900 | 0.53510900  | -1.80231900 |  | 6  | 2.34841400  | 1.75556500  | -0.84335000 |
| 1 | -2.51014100 | 3.74007800  | -0.52411900 | 1   | -2.86535800 | 1.38111100  | -2.37782600 |  | 6  | 3.19293600  | 1.08832100  | -1.74912000 |
| 1 | 1.27893700  | 2.05460200  | -1.68560700 | 6   | -2.77027300 | -1.27380900 | -0.42990200 |  | 6  | 2.93515100  | 2.62454000  | 0.09983900  |
| 1 | -2.03785800 | 5.75542000  | -1.89728100 | 6   | 0.58810800  | -2.04066000 | 0.62380300  |  | 6  | 4.56970700  | 1.28935200  | -1.71989400 |
| 1 | 1.74941500  | 4.06746700  | -3.07480700 | 6   | 1.90500000  | -1.36482800 | 0.37502300  |  | 6  | 4.31360300  | 2.81284000  | 0.13381600  |
| 1 | 0.08947400  | 5.92336600  | -3.18178800 | 1   | 1.93305900  | -1.05157500 | -0.68567100 |  | 6  | 5.13817100  | 2.14871200  | -0.77716500 |
| 1 | -0.71805500 | -1.86056600 | 0.30439900  | 1   | 1.91122900  | -0.41898900 | 0.93955200  |  | 6  | -1.06581400 | 2.69881900  | 0.46216300  |



|   |             |            |             |   |             |             |             |   |             |             |             |
|---|-------------|------------|-------------|---|-------------|-------------|-------------|---|-------------|-------------|-------------|
| 6 | -0.86194600 | 4.09595000 | 0.44616700  | 6 | -4.68388000 | 1.76329400  | -0.77123400 | 6 | -0.57535500 | -3.99580300 | 2.48619300  |
| 6 | -2.13677200 | 2.19674900 | 1.23049200  | 1 | -5.44833900 | 2.53693400  | -0.67585400 | 1 | -0.78994400 | -5.01489100 | 2.13692800  |
| 6 | -1.69214700 | 4.94598600 | 1.16853900  | 6 | -4.67204600 | 0.93072600  | -1.86930300 | 1 | -1.51494400 | -3.59621600 | 2.89056100  |
| 6 | -2.95195800 | 3.05056300 | 1.96600300  | 1 | -5.42822300 | 1.02937400  | -2.65193900 | 1 | 0.14856300  | -4.07886900 | 3.30774600  |
| 6 | -2.73887800 | 4.42989800 | 1.93596500  | 6 | -3.67980400 | -0.07058000 | -2.00871900 | 1 | 1.02493400  | -1.89220900 | -1.05567300 |
| 1 | 2.72828800  | 0.40389900 | -2.46651800 | 6 | -3.63348500 | -0.95662700 | -3.11198300 | 6 | 1.88113400  | 0.29878200  | -0.72542300 |
| 1 | 2.28893300  | 3.14234600 | 0.81425200  | 1 | -4.39974400 | -0.88911500 | -3.88786700 | 6 | 1.03344300  | 1.11096200  | -0.16895600 |
| 1 | 5.20901000  | 0.76805600 | -2.43764000 | 6 | -2.62623000 | -1.89578200 | -3.17529900 | 6 | 3.21733400  | 0.16245100  | -1.26118600 |
| 1 | 4.75015500  | 3.48640500 | 0.87591700  | 1 | -2.56807800 | -2.61227600 | -3.99599300 | 6 | 3.71470500  | -1.06352000 | -1.73252600 |
| 1 | 6.21986700  | 2.30136600 | -0.75202000 | 6 | -1.63823500 | -1.91380300 | -2.18015800 | 6 | 4.06287100  | 1.29031800  | -1.30482500 |
| 1 | -0.04223800 | 4.50190500 | -0.15259800 | 1 | -0.79550200 | -2.60852800 | -2.23457100 | 6 | 5.01221400  | -1.16157800 | -2.22598100 |
| 1 | -2.30699400 | 1.11637800 | 1.24759000  | 6 | -2.67061700 | -0.19911200 | -1.00523200 | 6 | 5.35771800  | 1.18857800  | -1.80097700 |
| 1 | -1.51873100 | 6.02485000 | 1.13755400  | 6 | -1.78123700 | -0.79666600 | 1.86488000  | 6 | 5.83950600  | -0.03841500 | -2.26265300 |
| 1 | -3.76761800 | 2.63664000 | 2.56439100  | 6 | -0.46467500 | -1.05687100 | 2.56778500  | 6 | 0.75285300  | 2.37855900  | 0.45266600  |
| 1 | -3.38635100 | 5.10035500 | 2.50576400  | 1 | 0.04776900  | -0.11507900 | 2.82154400  | 6 | -0.35523500 | 3.15653400  | 0.05110500  |
|   |             |            |             | 1 | -0.64981200 | -1.60397500 | 3.50967400  | 6 | 1.52765900  | 2.84739300  | 1.53702200  |
|   |             |            |             | 6 | 1.81417400  | -1.69603100 | 1.94755200  | 6 | -0.66418500 | 4.35065000  | 0.69557400  |
|   |             |            |             | 1 | 2.05569500  | -0.62183100 | 2.00887700  | 6 | 1.20329200  | 4.03538400  | 2.18509200  |
|   |             |            |             | 1 | 2.35910300  | -2.06422900 | 1.06347200  | 6 | 0.10774400  | 4.79543200  | 1.77013000  |
|   |             |            |             | 6 | 2.28342300  | -2.40459900 | 3.20179200  | 1 | 3.04635600  | -1.92901700 | -1.70076100 |
|   |             |            |             | 1 | 1.70840000  | -2.10924000 | 4.09248500  | 1 | 3.68277900  | 2.25086000  | -0.94647600 |
|   |             |            |             | 1 | 3.33479000  | -2.15515700 | 3.39979300  | 1 | 5.38289300  | -2.12362600 | -2.58880900 |
|   |             |            |             | 1 | 2.22706900  | -3.49791100 | 3.11118200  | 1 | 5.99838100  | 2.07358800  | -1.82956700 |
|   |             |            |             | 6 | -0.08251900 | -3.16101300 | 1.32066800  | 1 | 6.85754100  | -0.11701600 | -2.65167500 |
|   |             |            |             | 1 | 0.75484500  | -3.64800900 | 0.79876000  | 1 | -0.96611800 | 2.80926800  | -0.78742800 |
|   |             |            |             | 1 | -0.88931700 | -3.08784200 | 0.57443800  | 1 | 2.39184100  | 2.26013600  | 1.86075400  |

IM5

|     |             |             |             |    |             |             |             |     |             |             |             |
|-----|-------------|-------------|-------------|----|-------------|-------------|-------------|-----|-------------|-------------|-------------|
| 1   | -1.52101300 | 4.93902000  | 0.35655400  | 6  | 1.95975000  | 1.30242200  | 1.55279200  | 1   | -0.39993500 | -2.09521300 | -1.54567800 |
| 1   | 1.81800000  | 4.37645600  | 3.02210400  | 6  | 0.93106200  | 2.41617700  | 1.63644600  | 6   | -1.22227800 | -2.66391700 | 2.19977500  |
| 1   | -0.14086800 | 5.72845700  | 2.28031400  | 1  | -0.00447600 | 2.07032600  | 2.10410700  | 1   | -2.10276500 | -0.68932100 | 2.15718500  |
| 8   | -2.66840700 | -1.62274100 | 1.79613000  | 1  | 1.32949400  | 3.24984000  | 2.24108900  | 6   | -0.58442700 | -3.67267700 | 1.47390500  |
|     |             |             |             | 6  | -0.67283800 | 3.47595400  | 0.11141300  | 1   | 0.19653300  | -4.23604500 | -0.46068300 |
|     |             |             |             | 1  | -1.42564400 | 2.80444900  | 0.55425300  | 1   | -1.45759300 | -2.81849800 | 3.25692000  |
| IM6 |             |             |             | 1  | -0.90580000 | 3.50010300  | -0.96580700 | 1   | -0.30506900 | -4.61188100 | 1.95651200  |
| 7   | 1.39724700  | 0.03153500  | 1.41201600  | 6  | -0.78370500 | 4.86517100  | 0.70383300  | 6   | -4.07938700 | 0.05829200  | -0.57918400 |
| 1   | 0.54174100  | -0.20290600 | 1.91694700  | 1  | -0.48660200 | 4.89077800  | 1.76273800  | 6   | -5.18691100 | 0.92660000  | -0.66360500 |
| 7   | 2.05078500  | 0.00393500  | -1.22055100 | 1  | -1.82551600 | 5.20933700  | 0.65467700  | 6   | -4.35068600 | -1.31755800 | -0.42878800 |
| 7   | 0.62228500  | 2.78652100  | 0.24632300  | 1  | -0.17628500 | 5.60434500  | 0.16413800  | 6   | -6.49393700 | 0.45855700  | -0.57645800 |
| 6   | 2.19593400  | -1.04785000 | 0.94204600  | 6  | 1.74313300  | 3.43906300  | -0.47348700 | 1   | -5.00266800 | 1.99722200  | -0.79835500 |
| 6   | 2.59343800  | -2.09145500 | 1.75770400  | 1  | 1.30412300  | 3.84697600  | -1.39794700 | 6   | -5.65799800 | -1.78598100 | -0.34545400 |
| 1   | 2.29153900  | -2.09730900 | 2.80689500  | 1  | 2.44153200  | 2.64877500  | -0.79134200 | 1   | -3.52824800 | -2.03331300 | -0.39624300 |
| 6   | 3.37370000  | -3.13285100 | 1.22795300  | 6  | 2.52626400  | 4.50012400  | 0.27288800  | 6   | -6.73884000 | -0.90478200 | -0.41152900 |
| 1   | 3.67577700  | -3.96004300 | 1.87361300  | 1  | 1.90113800  | 5.30534300  | 0.68014300  | 1   | -7.32844200 | 1.16174400  | -0.64130900 |
| 6   | 3.77250700  | -3.10553800 | -0.09392100 | 1  | 3.25253600  | 4.96239100  | -0.40886200 | 1   | -5.83639700 | -2.85871300 | -0.23420000 |
| 1   | 4.39235900  | -3.90774200 | -0.50203900 | 1  | 3.10381600  | 4.05741700  | 1.09498500  | 1   | -7.76298900 | -1.27942800 | -0.34520200 |
| 6   | 3.38271500  | -2.04873400 | -0.95377000 | 27 | 0.34281500  | 0.73460800  | -0.54089800 | 8   | 3.14588000  | 1.51386500  | 1.43026300  |
| 6   | 3.74986900  | -1.97485200 | -2.32100400 | 6  | -2.73408000 | 0.63324400  | -0.67182500 |     |             |             |             |
| 1   | 4.38822400  | -2.74920600 | -2.75159000 | 6  | -1.52104600 | 0.09750800  | -0.37861600 |     |             |             |             |
| 6   | 3.28664700  | -0.91393800 | -3.08388400 | 1  | -2.75328000 | 1.67333400  | -1.03167200 | IM7 |             |             |             |
| 1   | 3.56029800  | -0.81540600 | -4.13585900 | 6  | -1.29931500 | -1.22482100 | 0.22038000  | 7   | 1.17581700  | -1.57747700 | -0.37370700 |
| 6   | 2.44663400  | 0.03908700  | -2.50876200 | 6  | -0.64566900 | -2.25676700 | -0.49000000 | 1   | 0.44786300  | 1.76605300  | -2.08652300 |
| 1   | 2.05393500  | 0.86762500  | -3.10656800 | 6  | -1.57841600 | -1.46409900 | 1.58646300  | 7   | 2.04571700  | 0.85050400  | 0.16027700  |
| 6   | 2.55438400  | -1.01215800 | -0.42949900 | 6  | -0.30760300 | -3.45992800 | 0.12198500  | 7   | -0.98555600 | -1.44564700 | 1.22037200  |

|   |             |             |             |    |             |             |             |     |             |             |             |
|---|-------------|-------------|-------------|----|-------------|-------------|-------------|-----|-------------|-------------|-------------|
| 6 | 2.50848600  | -1.37457900 | -0.61205400 | 6  | -0.09202500 | -1.39339800 | 2.40951000  | 1   | -2.23655100 | -1.94996100 | -2.44135600 |
| 6 | 3.45452300  | -2.30360200 | -1.05717000 | 1  | -0.54801100 | -0.67792700 | 3.11346300  | 6   | -4.87182600 | 0.54943800  | -1.11797400 |
| 1 | 3.12435500  | -3.31936400 | -1.26680200 | 1  | 0.86595200  | -0.94032500 | 2.09745600  | 1   | -3.26654200 | 1.96520700  | -0.96920600 |
| 6 | 4.80192800  | -1.93503400 | -1.21866700 | 6  | 0.21808000  | -2.70784300 | 3.09889000  | 6   | -5.26653700 | -0.74335000 | -1.46534600 |
| 1 | 5.50846600  | -2.68724000 | -1.57959400 | 1  | -0.67985700 | -3.24116900 | 3.43728600  | 1   | -4.60407400 | -2.64157100 | -2.26140100 |
| 6 | 5.25650100  | -0.66265000 | -0.93060300 | 1  | 0.84271700  | -2.51986300 | 3.98233900  | 1   | -5.61710500 | 1.27467200  | -0.78142500 |
| 1 | 6.30807200  | -0.39376200 | -1.05230300 | 1  | 0.78210100  | -3.38813400 | 2.44564300  | 1   | -6.31418100 | -1.04215600 | -1.38768700 |
| 6 | 4.34462300  | 0.30798400  | -0.45310800 | 27 | 0.08912800  | 0.11176600  | -0.04435900 | 8   | 1.11157200  | -3.90570300 | -0.32061500 |
| 6 | 4.71879900  | 1.62077700  | -0.08000200 | 6  | -1.11727800 | 0.34501200  | -1.75260000 |     |             |             |             |
| 1 | 5.76422900  | 1.92489300  | -0.18194100 | 6  | -0.40522500 | 1.52577700  | -1.44060200 |     |             |             |             |
| 6 | 3.77601700  | 2.49099100  | 0.42251300  | 1  | -0.62061400 | -0.26943300 | -2.51411500 | IM8 |             |             |             |
| 1 | 4.04337600  | 3.50133100  | 0.73609100  | 6  | -0.73090700 | 2.56873500  | -0.46581700 | 27  | -0.66995300 | -0.52955400 | 0.05936100  |
| 6 | 2.44117200  | 2.06133400  | 0.52816500  | 6  | -1.42255300 | 2.27830100  | 0.73269500  | 7   | 0.11780700  | 1.27056300  | -0.21990400 |
| 1 | 1.67010100  | 2.73111700  | 0.92192600  | 6  | -0.20978100 | 3.86909400  | -0.61241200 | 7   | 1.21018200  | -1.09696400 | 0.18873400  |
| 6 | 2.96704100  | -0.04344000 | -0.31046600 | 6  | -1.57337400 | 3.23504100  | 1.73110500  | 7   | -2.48186800 | 0.68236900  | 0.30596700  |
| 6 | 0.62140700  | -2.79229100 | -0.15861100 | 1  | -1.85712000 | 1.28203800  | 0.86510700  | 1   | -2.44273500 | -2.64805600 | -0.36901000 |
| 6 | -0.79461600 | -2.65467100 | 0.40237400  | 6  | -0.38463200 | 4.83340200  | 0.37651700  | 6   | 1.49654600  | 1.26249100  | -0.21231200 |
| 1 | -1.51435900 | -2.59737600 | -0.43076500 | 1  | 0.34489700  | 4.11445300  | -1.52237600 | 6   | 2.35358900  | 2.35320200  | -0.38395900 |
| 1 | -1.02613500 | -3.58572700 | 0.94758100  | 6  | -1.06071300 | 4.52251200  | 1.55730200  | 1   | 1.91487000  | 3.33751500  | -0.53951800 |
| 6 | -2.40351600 | -1.23914900 | 1.56480300  | 1  | -2.10440100 | 2.97580000  | 2.65060600  | 6   | 3.74713000  | 2.17582500  | -0.34937000 |
| 1 | -2.95703500 | -1.18044300 | 0.61615700  | 1  | 0.01809100  | 5.83832600  | 0.22735000  | 1   | 4.39153700  | 3.04768300  | -0.49155700 |
| 1 | -2.49153400 | -0.24357800 | 2.03183100  | 1  | -1.18952500 | 5.27724200  | 2.33589400  | 6   | 4.31789500  | 0.93557600  | -0.13540000 |
| 6 | -3.05635100 | -2.26539200 | 2.47060100  | 6  | -2.54659000 | 0.03294500  | -1.64190300 | 1   | 5.40310500  | 0.81150800  | -0.10192800 |
| 1 | -2.96601400 | -3.28811300 | 2.07825900  | 6  | -2.97674800 | -1.24980500 | -2.04204100 | 6   | 3.49131600  | -0.19747900 | 0.05614100  |
| 1 | -4.12988800 | -2.04995300 | 2.55881700  | 6  | -3.53774800 | 0.93685700  | -1.21134000 | 6   | 3.99983300  | -1.49874000 | 0.31145700  |
| 1 | -2.64220800 | -2.25430900 | 3.48857100  | 6  | -4.30914600 | -1.63707100 | -1.94790300 | 1   | 5.08063700  | -1.65454400 | 0.35247700  |

|   |             |             |             |     |             |             |             |   |             |             |             |
|---|-------------|-------------|-------------|-----|-------------|-------------|-------------|---|-------------|-------------|-------------|
| 6 | 3.11623100  | -2.54180300 | 0.51953600  | 1   | -1.11388900 | -4.21377700 | -1.54624700 | 6 | 2.16252500  | 1.54253200  | 0.27150900  |
| 1 | 3.47374200  | -3.55102700 | 0.73491700  | 1   | -1.43819800 | -2.72322100 | -2.49324800 | 1 | 2.83710200  | 2.33669600  | -0.09217100 |
| 6 | 1.73934100  | -2.30152500 | 0.45467500  | 1   | 0.09766500  | -2.90104900 | -1.60742600 | 1 | 2.30443300  | 1.40906000  | 1.35470200  |
| 1 | 1.02343200  | -3.11260200 | 0.62856100  |     |             |             |             | 6 | 2.54117500  | 0.34791900  | -1.83251500 |
| 6 | 2.07697500  | -0.03396400 | 0.00551200  |     |             |             |             | 1 | 3.49810500  | 0.82087900  | -2.12445700 |
| 6 | -0.66583000 | 2.36623800  | -0.28247000 | IM9 |             |             |             | 1 | 1.75596800  | 1.04633300  | -2.15862700 |
| 6 | -2.15592000 | 1.98713600  | -0.30309300 | 27  | 0.63491800  | -0.78358500 | 0.12234300  | 6 | 2.36721500  | -0.98907500 | -2.51239200 |
| 1 | -2.73741900 | 2.80254200  | 0.16540600  | 7   | -0.19204400 | 1.26905300  | 0.75029100  | 1 | 3.18730800  | -1.68804400 | -2.29585100 |
| 1 | -2.45707600 | 1.96806900  | -1.36073800 | 7   | -1.22556800 | -1.12464400 | -0.18242500 | 1 | 2.31902500  | -0.87311100 | -3.60269200 |
| 6 | -2.51662800 | 0.81516600  | 1.77373400  | 7   | 2.44268700  | 0.23567100  | -0.36455700 | 1 | 1.42567700  | -1.47105200 | -2.19059900 |
| 1 | -3.43119100 | 1.36163500  | 2.08378200  | 6   | -1.57827000 | 1.19325400  | 0.44526900  | 6 | 3.59463600  | -0.44353400 | 0.26732900  |
| 1 | -1.66615800 | 1.45585300  | 2.05453000  | 6   | -2.40428800 | 2.30160300  | 0.55849800  | 1 | 3.66783100  | -1.44582200 | -0.18337200 |
| 6 | -2.40258100 | -0.50551600 | 2.50037800  | 1   | -1.97073900 | 3.24962800  | 0.88001800  | 1 | 3.29596100  | -0.60729500 | 1.31404500  |
| 1 | -3.19675700 | -1.21807400 | 2.23420200  | 6   | -3.77020000 | 2.19632600  | 0.26049400  | 6 | 4.91972900  | 0.27979700  | 0.16804300  |
| 1 | -2.46322500 | -0.35488300 | 3.58679500  | 1   | -4.41260200 | 3.07420700  | 0.35543200  | 1 | 5.25566400  | 0.42168400  | -0.86942400 |
| 1 | -1.42785400 | -0.98386500 | 2.29442800  | 6   | -4.30280400 | 0.98763400  | -0.14693600 | 1 | 5.70058300  | -0.29726000 | 0.68039100  |
| 6 | -3.73823300 | 0.13269900  | -0.21541700 | 1   | -5.36799100 | 0.89977700  | -0.37540300 | 1 | 4.88740000  | 1.26858900  | 0.64751000  |
| 1 | -4.57699000 | 0.84024900  | -0.04520300 | 6   | -3.48685200 | -0.15826800 | -0.29673800 | 8 | 0.42205400  | 2.69165800  | -0.94504100 |
| 1 | -3.98289400 | -0.75732200 | 0.38677100  | 6   | -3.98789000 | -1.40880300 | -0.74538200 | 1 | 0.16605700  | 0.71605500  | 1.56665600  |
| 6 | -3.65235300 | -0.25232400 | -1.67612100 | 1   | -5.05225000 | -1.51565300 | -0.96431000 | 6 | 0.68244100  | -1.67014900 | 2.94979800  |
| 1 | -3.67528100 | 0.61364300  | -2.35007400 | 6   | -3.10529400 | -2.46687300 | -0.90389800 | 1 | 0.87604300  | -1.34220600 | 3.99242800  |
| 1 | -4.49016900 | -0.90115500 | -1.96582600 | 1   | -3.45180800 | -3.44364600 | -1.24649300 | 1 | -0.40349300 | -1.91595800 | 2.90535600  |
| 1 | -2.70670200 | -0.78396800 | -1.86653600 | 6   | -1.75359600 | -2.29014700 | -0.62317000 | 1 | 1.21440800  | -2.64229400 | 2.84014000  |
| 8 | -0.36032700 | 3.55083800  | -0.37112300 | 1   | -1.04756200 | -3.11732500 | -0.74321700 | 8 | 1.07136600  | -0.72490000 | 2.02987400  |
| 8 | -1.49034300 | -2.49802600 | -0.40781400 | 6   | -2.09124300 | -0.05142800 | -0.00651100 |   |             |             |             |
| 6 | -0.97517700 | -3.12222700 | -1.57652400 | 6   | 0.72091500  | 1.94236700  | -0.03592400 |   |             |             |             |

|      |             |             |             |      |             |             |             |    |             |             |             |
|------|-------------|-------------|-------------|------|-------------|-------------|-------------|----|-------------|-------------|-------------|
| IM10 |             |             |             | 1    | 3.50874900  | 1.14539800  | -0.27281400 | 27 | 0.62310200  | -0.42756300 | -0.39989400 |
| 27   | 0.50480800  | 0.76683400  | -0.37165500 | 1    | 3.26903400  | 0.26718000  | -1.76439300 | 7  | 2.12855300  | 1.03014200  | -0.59748800 |
| 8    | 0.35635000  | -3.20295900 | 0.36066800  | 6    | 4.81245100  | -0.56817700 | -0.50652500 | 7  | 2.18798100  | -1.61670200 | -0.36897000 |
| 7    | -0.40203000 | -1.40327700 | -0.83352800 | 1    | 5.58213900  | -0.05451300 | -1.09800900 | 7  | -0.07413100 | 2.49726100  | 0.45948700  |
| 7    | -1.45059200 | 1.02953400  | -0.22994100 | 1    | 4.79727300  | -1.61582300 | -0.84239200 | 1  | -0.26181700 | 1.44812800  | 0.29179700  |
| 7    | 2.28709700  | -0.52272600 | -0.12110600 | 1    | 5.15477600  | -0.55297200 | 0.53718600  | 6  | 3.39081000  | 0.43993400  | -0.56384300 |
| 6    | -1.75099100 | -1.35685200 | -0.42096400 | 6    | 2.26307800  | -0.59282200 | 1.35869900  | 6  | 4.63100000  | 1.08605700  | -0.62074200 |
| 6    | -2.52876700 | -2.49526700 | -0.27544300 | 1    | 1.19860600  | -0.58430100 | 1.67236600  | 1  | 4.66216500  | 2.16143300  | -0.77336100 |
| 1    | -2.08531000 | -3.47311200 | -0.45909800 | 1    | 2.67834500  | 0.36294200  | 1.71172100  | 6  | 5.83126500  | 0.36403200  | -0.50002900 |
| 6    | -3.87562000 | -2.37287800 | 0.10511800  | 6    | 2.93684100  | -1.77963600 | 2.01904200  | 1  | 6.77481200  | 0.91435400  | -0.54294000 |
| 1    | -4.48034600 | -3.27460900 | 0.22103000  | 1    | 2.88012400  | -1.67108100 | 3.11016500  | 6  | 5.84935300  | -1.00646100 | -0.33976500 |
| 6    | -4.44196200 | -1.13031700 | 0.30863900  | 1    | 3.99751500  | -1.87233000 | 1.75421900  | 1  | 6.78878500  | -1.55753800 | -0.25619100 |
| 1    | -5.49644600 | -1.03731700 | 0.57938100  | 1    | 2.43503100  | -2.72332500 | 1.76577100  | 6  | 4.62562400  | -1.71205700 | -0.29140300 |
| 6    | -3.67029500 | 0.04947700  | 0.17636500  | 1    | 0.54938900  | 3.56894200  | -1.34387600 | 6  | 4.54015100  | -3.11916300 | -0.14259400 |
| 6    | -4.19549900 | 1.35078700  | 0.37076900  | 5    | 1.43381500  | 2.73761400  | -1.16733400 | 1  | 5.45995700  | -3.70274000 | -0.05451200 |
| 1    | -5.25158200 | 1.47340700  | 0.62083000  | 1    | 2.50863700  | 3.04088700  | -1.66901200 | 6  | 3.30389700  | -3.73129800 | -0.11811800 |
| 6    | -3.35426000 | 2.44096200  | 0.23318700  | 1    | 1.10100300  | 1.64210200  | -1.77998400 | 1  | 3.20773200  | -4.81305500 | -0.01156900 |
| 1    | -3.72511800 | 3.45954800  | 0.35903200  | 8    | 1.55977200  | 2.39440800  | 0.30405700  | 6  | 2.14988300  | -2.94476200 | -0.23772100 |
| 6    | -2.00114700 | 2.24338600  | -0.05246400 | 6    | 1.28318000  | 3.39648200  | 1.22894300  | 1  | 1.15511700  | -3.40270300 | -0.23182300 |
| 1    | -1.31541100 | 3.08930000  | -0.15859000 | 1    | 1.28926000  | 2.97505900  | 2.24760800  | 6  | 3.40343800  | -0.98395800 | -0.40075200 |
| 6    | -2.28673800 | -0.06651500 | -0.15915900 | 1    | 2.04130500  | 4.19891200  | 1.19088400  | 6  | 1.99983700  | 2.31848900  | -0.99648300 |
| 6    | 0.57765900  | -2.25849600 | -0.36605500 | 1    | 0.29967400  | 3.87497500  | 1.06036400  | 6  | 0.60216300  | 2.91692500  | -0.79547400 |
| 6    | 1.97298900  | -1.80203500 | -0.76653300 | 1    | -0.13934300 | -0.75513100 | -1.59468300 | 1  | 0.69508600  | 4.01137300  | -0.80293200 |
| 1    | 2.67752100  | -2.61285900 | -0.51441800 |      |             |             |             | 1  | -0.05481700 | 2.61859900  | -1.62591600 |
| 1    | 2.02692300  | -1.64526900 | -1.85710900 |      |             |             |             | 6  | 0.79301800  | 2.62057800  | 1.68136100  |
| 6    | 3.48058900  | 0.12941900  | -0.69205200 | IM11 |             |             |             | 1  | 0.56932700  | 3.59721700  | 2.13634900  |

|   |             |             |             |      |             |             |             |    |             |             |             |
|---|-------------|-------------|-------------|------|-------------|-------------|-------------|----|-------------|-------------|-------------|
| 1 | 1.83725900  | 2.65025500  | 1.34852400  | 6    | -3.50144600 | -0.68898400 | -1.51661600 | 6  | 2.83211200  | -2.18749100 | 0.13555700  |
| 6 | 0.57305200  | 1.47574200  | 2.63329200  | 6    | -4.22244900 | -0.14427200 | -2.59898500 | 1  | 5.76063400  | -0.52596900 | 0.63682700  |
| 1 | -0.47187600 | 1.38779000  | 2.96575800  | 6    | -4.17671300 | -1.60977400 | -0.68857700 | 1  | 4.83779100  | -2.86416500 | 0.52973800  |
| 1 | 1.20062800  | 1.59926500  | 3.52431100  | 6    | -5.55749100 | -0.46632800 | -2.82273000 | 1  | 2.40819400  | -3.19564500 | 0.09848400  |
| 1 | 0.85194100  | 0.52812600  | 2.14597800  | 1    | -3.71201800 | 0.55249300  | -3.27214900 | 7  | 0.22103500  | 0.73725900  | -0.53207000 |
| 6 | -1.38319100 | 3.18834700  | 0.68712200  | 6    | -5.50924600 | -1.93565800 | -0.91550500 | 7  | 1.96956400  | -1.17658500 | -0.05911200 |
| 1 | -1.13825700 | 4.22619400  | 0.96437700  | 1    | -3.63788400 | -2.09121100 | 0.12985500  | 27 | 0.07035900  | -1.30443100 | -0.32328100 |
| 1 | -1.82092900 | 2.70810400  | 1.57502600  | 6    | -6.21298300 | -1.36126200 | -1.97675200 | 6  | -0.79985300 | 1.60324300  | -0.70355000 |
| 6 | -2.33536900 | 3.14753500  | -0.47810400 | 1    | -6.08960000 | -0.02069200 | -3.66725000 | 6  | -2.11874100 | 0.92053600  | -1.09967600 |
| 1 | -1.99864500 | 3.76970500  | -1.31767700 | 1    | -6.00481900 | -2.65776600 | -0.26137100 | 7  | -2.82527700 | 0.22647200  | 0.02210300  |
| 1 | -3.30823400 | 3.53985400  | -0.15616600 | 1    | -7.25948800 | -1.62180700 | -2.15108300 | 6  | -2.55655700 | 0.81397700  | 1.36352100  |
| 1 | -2.49336200 | 2.12228700  | -0.84058800 | 8    | 2.82923300  | 3.06623100  | -1.50587700 | 6  | -4.26933300 | 0.03591200  | -0.28365000 |
| 1 | -1.64105800 | 0.05986400  | -2.26573700 |      |             |             |             | 6  | -3.19631100 | 0.01442600  | 2.46895700  |
| 6 | -1.31778200 | -0.28803200 | -0.20675200 |      |             |             |             | 6  | -5.11285400 | 1.27747400  | -0.14408300 |
| 6 | -2.10217400 | -0.29848700 | -1.33101300 | IM12 |             |             |             | 1  | -1.46304100 | 0.79974600  | 1.47122100  |
| 6 | -1.85982600 | -0.52354300 | 1.14386800  | 6    | 3.82875500  | 0.39165000  | 0.23980700  | 1  | -2.85972000 | 1.87231100  | 1.35659100  |
| 6 | -2.95768600 | 0.20220900  | 1.65372400  | 6    | 2.45546000  | 0.11375000  | -0.01834200 | 1  | -4.29284800 | 0.08651400  | 2.47899100  |
| 6 | -1.20890000 | -1.40323900 | 2.03226100  | 6    | 1.51380100  | 1.16883200  | -0.24801800 | 1  | -2.91849000 | -1.04648700 | 2.39035300  |
| 6 | -3.37122500 | 0.06035500  | 2.97610200  | 6    | 1.98309400  | 2.48587100  | -0.19063000 | 1  | -2.84193000 | 0.37844900  | 3.44080300  |
| 1 | -3.50145300 | 0.87784700  | 0.98472000  | 6    | 3.33785300  | 2.75208900  | 0.07271700  | 1  | -4.30891600 | -0.36246100 | -1.30842000 |
| 6 | -1.63504200 | -1.56526900 | 3.34739800  | 6    | 4.25343300  | 1.74038400  | 0.28338100  | 1  | -4.63305300 | -0.77041800 | 0.37065400  |
| 1 | -0.33975700 | -1.96513900 | 1.66651600  | 1    | 1.28268200  | 3.30086800  | -0.35360200 | 1  | -6.13828800 | 1.06866900  | -0.47285800 |
| 6 | -2.71550700 | -0.82632900 | 3.83327400  | 1    | 3.66796400  | 3.79385300  | 0.10787000  | 1  | -5.17053500 | 1.62687800  | 0.89558400  |
| 1 | -4.22505700 | 0.63865100  | 3.34026000  | 1    | 5.30446700  | 1.96054600  | 0.48574600  | 1  | -4.73834800 | 2.10941400  | -0.75555400 |
| 1 | -1.11277900 | -2.26659400 | 4.00351900  | 6    | 4.70158500  | -0.70936700 | 0.44039300  | 1  | -2.77592200 | 1.70617000  | -1.49561600 |
| 1 | -3.04416700 | -0.94080900 | 4.86858000  | 6    | 4.19429100  | -1.99468000 | 0.38202600  | 1  | -1.96494700 | 0.15255900  | -1.87364100 |

|      |             |             |             |   |             |             |             |      |             |             |             |
|------|-------------|-------------|-------------|---|-------------|-------------|-------------|------|-------------|-------------|-------------|
| 8    | -0.82580600 | 2.82775200  | -0.57958700 | 1 | 4.74895300  | -2.24671200 | -1.43974400 | 8    | -0.21022600 | -3.12705100 | 0.46195500  |
| 1    | -2.39879800 | -0.80218700 | 0.03397000  | 6 | 2.70228600  | -1.78162900 | -0.93527600 | 6    | 0.17129400  | -3.46189700 | 1.76159600  |
| 8    | -1.68426200 | -2.04582600 | -0.02949500 | 1 | 2.31110500  | -2.77185800 | -1.18999100 | 1    | -0.26807100 | -2.77724100 | 2.51100600  |
| 6    | -2.21300500 | -3.15101600 | -0.67410900 | 6 | 2.22865100  | 0.35266900  | -0.11776700 | 1    | -0.13970600 | -4.48871200 | 2.02356700  |
| 1    | -3.15139600 | -3.49703600 | -0.19421000 | 6 | -1.05625100 | 1.45345900  | 1.03310200  | 1    | 1.26760300  | -3.40506800 | 1.84372900  |
| 1    | -2.45703500 | -2.97048000 | -1.74418000 | 6 | -2.43839200 | 0.80461900  | 0.88425800  | 1    | -2.14497700 | -0.28392200 | -0.78083900 |
| 1    | -1.52725400 | -4.02045300 | -0.65975900 | 1 | -2.47607200 | -0.16571700 | 1.40146300  |      |             |             |             |
|      |             |             |             | 1 | -3.19844500 | 1.47706700  | 1.30208200  |      |             |             |             |
|      |             |             |             | 6 | -2.42721100 | 1.64258600  | -1.47810000 |      |             |             |             |
|      |             |             |             | 1 | -2.75332500 | 1.31622000  | -2.47633100 | IM14 |             |             |             |
| IM13 |             |             |             | 1 | -1.32948900 | 1.67685300  | -1.49092100 | 27   | 0.02795300  | -0.48472800 | 0.37183600  |
| 27   | -0.11511600 | -1.21346000 | -0.33326300 | 6 | -3.01483800 | 2.97519600  | -1.09273400 | 8    | -3.81543700 | 0.91052300  | -0.38183400 |
| 8    | -1.01963300 | 2.53644600  | 1.61894800  | 1 | -2.64441500 | 3.31359600  | -0.11576400 | 7    | -2.02992100 | -0.34588900 | 0.44527800  |
| 7    | -0.05970600 | 0.73340300  | 0.47397600  | 1 | -4.11346500 | 2.97333300  | -1.07912900 | 7    | -0.46161400 | -2.27898500 | -0.36600300 |
| 7    | 1.80786900  | -0.89499100 | -0.49327000 | 1 | -2.70730100 | 3.72522900  | -1.83159700 | 7    | -2.61995100 | 3.22134200  | 0.52807000  |
| 7    | -2.78822800 | 0.52425200  | -0.54415400 | 6 | -4.20575000 | 0.08774700  | -0.74179300 | 6    | -2.64432600 | -1.59502600 | 0.28717200  |
| 6    | 1.23884000  | 1.24298000  | 0.41993900  | 1 | -4.30394800 | -0.12420700 | -1.81679300 | 6    | -3.96859400 | -1.90486200 | 0.59590700  |
| 6    | 1.67214200  | 2.51535300  | 0.81088300  | 1 | -4.83295700 | 0.96658200  | -0.52970800 | 1    | -4.62308400 | -1.15020900 | 1.04093400  |
| 1    | 0.95417500  | 3.20617700  | 1.24312600  | 6 | -4.62789600 | -1.09919600 | 0.08042300  | 6    | -4.44883100 | -3.21559200 | 0.40589000  |
| 6    | 3.01847400  | 2.89842500  | 0.67066000  | 1 | -4.01691800 | -1.98905300 | -0.11796900 | 1    | -5.48709800 | -3.44075100 | 0.65876500  |
| 1    | 3.30702400  | 3.90419100  | 0.98757500  | 1 | -5.66731500 | -1.34359100 | -0.17174700 | 6    | -3.62971100 | -4.21085300 | -0.08760600 |
| 6    | 3.97520700  | 2.04338500  | 0.16535600  | 1 | -4.59507000 | -0.89936000 | 1.15889400  | 1    | -4.01494300 | -5.22130600 | -0.24218500 |
| 1    | 5.02072100  | 2.34761600  | 0.07598100  | 1 | -2.31051700 | -3.67053300 | -0.29631100 | 6    | -2.26838100 | -3.94299500 | -0.38170900 |
| 6    | 3.59673800  | 0.74012900  | -0.23239600 | 1 | -1.62786600 | -2.78264800 | 0.19679400  | 6    | -1.35351700 | -4.90534100 | -0.87535000 |
| 6    | 4.51242900  | -0.22043400 | -0.73042700 | 5 | -2.16031300 | -2.26453400 | 1.17895400  | 1    | -1.69150900 | -5.92690200 | -1.06249200 |
| 1    | 5.56690400  | 0.04923800  | -0.82895300 | 1 | -1.60573800 | -1.93089800 | -0.82157400 | 6    | -0.03987200 | -4.52971300 | -1.10176500 |
| 6    | 4.06400100  | -1.48203200 | -1.06905300 |   |             |             |             | 1    | 0.69129300  | -5.24705700 | -1.47858000 |

|   |             |             |             |      |             |             |             |   |             |             |             |
|---|-------------|-------------|-------------|------|-------------|-------------|-------------|---|-------------|-------------|-------------|
| 6 | 0.37206100  | -3.22139200 | -0.82196200 | 1    | 8.24704100  | 0.37509600  | 0.10893800  | 7 | 1.84449400  | 0.88977100  | -0.31303800 |
| 1 | 1.41617200  | -2.91435800 | -0.93989700 | 6    | 1.69100600  | 0.75455000  | -0.40796400 | 7 | 0.02751100  | -1.12296200 | 1.56100600  |
| 6 | -1.77360200 | -2.62531400 | -0.16721100 | 6    | 1.85690100  | 2.12049000  | -0.02141600 | 6 | 2.43585000  | -1.33978300 | -0.93586500 |
| 6 | -2.60484900 | 0.77624600  | 0.14061500  | 6    | 1.06476800  | 0.52172900  | -1.67277000 | 6 | 3.45702600  | -2.28776700 | -1.09279400 |
| 6 | -1.82863500 | 2.04775900  | 0.27806900  | 6    | 1.44261900  | 3.15826700  | -0.83602800 | 1 | 3.17400800  | -3.32026200 | -1.31210300 |
| 1 | -1.03569800 | 1.86521000  | 1.03880700  | 1    | 2.34230700  | 2.32857400  | 0.93638900  | 6 | 4.81046800  | -1.92762600 | -1.01794100 |
| 1 | -1.26705100 | 2.16006300  | -0.66797300 | 6    | 0.65425000  | 1.58595000  | -2.48299800 | 1 | 5.56993500  | -2.69934000 | -1.16905400 |
| 6 | -2.77834400 | 3.51057800  | 1.94115200  | 1    | 1.00310800  | -0.50135400 | -2.05562000 | 6 | 5.20375800  | -0.62426900 | -0.76836500 |
| 1 | -3.38967900 | 4.42334400  | 2.02495800  | 6    | 0.83173100  | 2.90659900  | -2.07740400 | 1 | 6.25954300  | -0.34993800 | -0.71871300 |
| 1 | -1.80212200 | 3.75395400  | 2.42271200  | 1    | 1.60649600  | 4.19107500  | -0.51393100 | 6 | 4.21895600  | 0.36395900  | -0.54288800 |
| 6 | -2.26325700 | 4.36649800  | -0.29339900 | 1    | 0.20716600  | 1.37083400  | -3.45811200 | 6 | 4.51586800  | 1.70540300  | -0.19518600 |
| 1 | -1.18117500 | 4.61734700  | -0.21295400 | 1    | 0.51608000  | 3.73353600  | -2.71788700 | 1 | 5.56042400  | 2.02498400  | -0.14820400 |
| 1 | -2.79905200 | 5.23736600  | 0.11571800  | 6    | -2.64765400 | 4.17442000  | -1.74313800 | 6 | 3.49480000  | 2.58042400  | 0.10320200  |
| 1 | 2.98279900  | -1.60525800 | 1.82003800  | 6    | -3.44644200 | 2.38476800  | 2.69945400  | 1 | 3.69829300  | 3.61282000  | 0.39239700  |
| 6 | 1.94100400  | -0.34888200 | 0.50232400  | 1    | -3.72699000 | 3.99191000  | -1.83990600 | 6 | 2.16437100  | 2.12744400  | 0.04784400  |
| 6 | 3.08048100  | -0.83032100 | 1.04576400  | 1    | -2.38861500 | 5.05868100  | -2.34151800 | 1 | 1.33569100  | 2.79383000  | 0.30886800  |
| 6 | 4.46945200  | -0.47903300 | 0.75160700  | 1    | -2.12653200 | 3.31898300  | -2.19903600 | 6 | 2.83744800  | 0.00252200  | -0.61797800 |
| 6 | 4.86210200  | 0.34027800  | -0.32738300 | 1    | -2.83195700 | 1.47127900  | 2.71818800  | 6 | 0.50027300  | -2.56718500 | -0.28784400 |
| 6 | 5.49135700  | -0.99008200 | 1.57725500  | 1    | -3.61734600 | 2.66639200  | 3.74682300  | 6 | 0.79070800  | -2.34152500 | 1.20389100  |
| 6 | 6.20128700  | 0.64206100  | -0.55002300 | 1    | -4.41784900 | 2.13072300  | 2.25114000  | 1 | 0.51574800  | -3.21344500 | 1.81695500  |
| 1 | 4.10519600  | 0.73440900  | -1.00855300 | 1    | -4.19266700 | 0.02738200  | -0.54447600 | 1 | 1.85706700  | -2.13139300 | 1.37175500  |
| 6 | 6.83076300  | -0.68719100 | 1.35487400  |      |             |             |             | 6 | -1.42540400 | -1.37375400 | 1.77864700  |
| 1 | 5.21187900  | -1.63684400 | 2.41470200  |      |             |             |             | 1 | -1.94174900 | -1.29614400 | 0.80607900  |
| 6 | 7.19639500  | 0.13566500  | 0.28922000  | IM15 |             |             |             | 1 | -1.79639300 | -0.53075600 | 2.38449100  |
| 1 | 6.47487600  | 1.27810900  | -1.39620300 | 27   | -0.01271900 | 0.03792900  | -0.38659700 | 6 | -1.82868800 | -2.69537600 | 2.39692800  |
| 1 | 7.59717300  | -1.09762700 | 2.01783800  | 7    | 1.10740600  | -1.62679900 | -1.07686400 | 1 | -1.62585400 | -3.52535100 | 1.70634000  |



|   |             |             |             |      |             |             |             |   |             |             |             |
|---|-------------|-------------|-------------|------|-------------|-------------|-------------|---|-------------|-------------|-------------|
| 1 | -2.91086800 | -2.68748400 | 2.58492200  | 6    | -0.79993600 | 3.77812500  | -0.88280000 | 1 | 4.88043700  | 1.16263500  | -1.09374300 |
| 1 | -1.32582100 | -2.90245700 | 3.35189800  | 6    | -1.71362000 | 2.10098500  | 0.58481200  | 6 | 3.08243800  | 0.89290200  | -2.26070600 |
| 6 | 0.65477300  | -0.34466400 | 2.64090500  | 6    | -0.97311900 | 4.73958200  | 0.10952900  | 1 | 3.48938100  | 1.31904400  | -3.17976300 |
| 1 | 0.13859800  | 0.63064800  | 2.68369200  | 1    | -0.36330500 | 4.06102400  | -1.84469800 | 6 | 1.75755900  | 0.44037600  | -2.24770600 |
| 1 | 1.68299300  | -0.11955900 | 2.31330100  | 6    | -1.86705300 | 3.05802500  | 1.58226000  | 1 | 1.13317600  | 0.52171100  | -3.14295800 |
| 6 | 0.67149000  | -0.99207700 | 4.00937700  | 1    | -2.03091000 | 1.07153000  | 0.77777100  | 6 | 1.93137100  | -0.21609000 | -0.01004000 |
| 1 | -0.34048500 | -1.12427500 | 4.41770000  | 6    | -1.50040000 | 4.38587900  | 1.35169400  | 6 | -1.09975500 | -0.72980700 | 1.38204900  |
| 1 | 1.22782200  | -0.36827100 | 4.72195900  | 1    | -0.68637500 | 5.77560000  | -0.08707800 | 6 | -1.10800100 | 0.79905900  | 1.37824600  |
| 1 | 1.15870500  | -1.97796000 | 3.98987300  | 1    | -2.28363000 | 2.76431900  | 2.54949600  | 1 | -1.77341800 | 1.21437300  | 2.15291600  |
| 8 | -0.39313700 | -3.33172700 | -0.62531600 | 1    | -1.62760100 | 5.13757100  | 2.13348600  | 1 | -0.10295300 | 1.21653900  | 1.53709700  |
| 6 | -1.41474600 | 0.16426100  | -1.91663500 |      |             |             |             | 6 | -2.99110100 | 1.06178900  | -0.24620300 |
| 6 | -0.83203200 | 1.42490900  | -1.68585300 |      |             |             |             | 1 | -3.24126500 | 0.01989800  | -0.49904500 |
| 1 | -0.09551400 | 1.76353700  | -2.42378700 | IM16 |             |             |             | 1 | -3.17913400 | 1.64305600  | -1.16368600 |
| 1 | -0.96496000 | -0.40376400 | -2.73901400 | 27   | -0.64119800 | -0.68032600 | -0.91999600 | 6 | -3.91019000 | 1.50622700  | 0.87162300  |
| 6 | -2.72643000 | -0.35533700 | -1.49592800 | 7    | 0.02869300  | -1.35302100 | 0.98976300  | 1 | -3.85830300 | 0.80408700  | 1.71431500  |
| 6 | -2.93816700 | -1.74832300 | -1.53092900 | 7    | 1.17664500  | -0.09505900 | -1.16285500 | 1 | -4.94893900 | 1.50654400  | 0.51472500  |
| 6 | -3.79818300 | 0.46528300  | -1.09697200 | 7    | -1.53026900 | 1.15095500  | -0.00001000 | 1 | -3.68827000 | 2.51588400  | 1.24385000  |
| 6 | -4.15039400 | -2.29845500 | -1.12725400 | 6    | 1.29130400  | -0.80110400 | 1.12760900  | 6 | -0.92405800 | 2.39463900  | -0.49108300 |
| 1 | -2.11755000 | -2.40186300 | -1.83890300 | 6    | 2.01320600  | -0.85739200 | 2.32226900  | 1 | -1.09033000 | 2.43063900  | -1.58149400 |
| 6 | -5.01144800 | -0.08922900 | -0.69828200 | 1    | 1.53196700  | -1.30119900 | 3.19668100  | 1 | 0.16562900  | 2.29085600  | -0.36375700 |
| 1 | -3.68486700 | 1.55122100  | -1.11791300 | 6    | 3.33318800  | -0.38648700 | 2.39780800  | 6 | -1.40229800 | 3.67884400  | 0.15396700  |
| 6 | -5.19117300 | -1.47346400 | -0.69742000 | 1    | 3.86691700  | -0.45230900 | 3.34938900  | 1 | -2.45882200 | 3.88721700  | -0.06617900 |
| 1 | -4.28126000 | -3.38320900 | -1.14834200 | 6    | 3.96943300  | 0.14612100  | 1.29101200  | 1 | -0.82077400 | 4.53406400  | -0.21641200 |
| 1 | -5.83061400 | 0.56858500  | -0.39672800 | 1    | 5.00066200  | 0.50172000  | 1.35105000  | 1 | -1.28428600 | 3.65405500  | 1.24742700  |
| 1 | -6.14387400 | -1.90435300 | -0.38041400 | 6    | 3.27890900  | 0.24577900  | 0.06106600  | 8 | -2.21093500 | -1.30299900 | 1.51132100  |
| 6 | -1.16742500 | 2.43433400  | -0.67534000 | 6    | 3.84816000  | 0.80535100  | -1.11391200 | 1 | -2.37946200 | -2.03654700 | 0.03938300  |

|      |             |             |             |   |             |             |             |     |             |             |             |
|------|-------------|-------------|-------------|---|-------------|-------------|-------------|-----|-------------|-------------|-------------|
| 8    | -2.17982200 | -2.09715700 | -0.94328200 | 6 | 2.09156500  | 0.16619600  | -0.20019400 | 6   | -2.66804200 | 2.86286600  | -0.34503600 |
| 6    | -1.70370700 | -3.40170400 | -1.21813900 | 6 | -0.47019600 | -1.74439300 | -0.80264900 | 1   | -2.11810800 | 3.26143200  | 0.52432200  |
| 1    | -2.51065600 | -4.14499900 | -1.12717400 | 6 | -0.69187600 | -1.73210400 | 0.68659400  | 1   | -2.99176600 | 3.72334100  | -0.95905400 |
| 1    | -1.33595000 | -3.42687400 | -2.25255400 | 1 | -1.17265300 | -2.65903300 | 1.04796900  | 1   | -3.58906400 | 2.36822300  | 0.02398700  |
| 1    | -0.88142700 | -3.68147900 | -0.53991600 | 1 | 0.27908200  | -1.64559100 | 1.19628500  |     |             |             |             |
|      |             |             |             | 6 | -2.92170000 | -0.62732800 | 0.71334900  |     |             |             |             |
|      |             |             |             | 1 | -3.11042100 | -0.53283200 | -0.36922800 | TS1 |             |             |             |
| IM17 |             |             |             | 1 | -3.37317900 | 0.27188700  | 1.15985000  | 27  | -0.02676800 | -1.72918200 | -0.68896900 |
| 27   | -0.64828200 | 0.34933600  | -0.97062200 | 6 | -3.60005900 | -1.88150300 | 1.22550000  | 7   | 0.24332100  | 0.42373600  | -0.45882300 |
| 7    | 0.61880500  | -1.33164900 | -1.42677200 | 1 | -3.30086000 | -2.76867100 | 0.65034300  | 1   | 1.22343200  | 0.02387200  | 0.42008800  |
| 7    | 1.06894200  | 1.07607400  | -0.24424000 | 1 | -4.68694400 | -1.78427900 | 1.10368100  | 7   | -1.77007400 | -1.25056700 | 0.02021200  |
| 7    | -1.46509500 | -0.51021000 | 0.94624000  | 1 | -3.40432100 | -2.08311700 | 2.28793500  | 7   | 2.47043500  | 0.05692400  | 0.47582500  |
| 6    | 1.82903900  | -1.11336800 | -0.76624100 | 6 | -1.09013100 | 0.20773300  | 2.16491600  | 6   | -1.01093400 | 0.99862400  | -0.22486900 |
| 6    | 2.82818400  | -2.07958800 | -0.71136000 | 1 | -1.49255800 | 1.23076000  | 2.07361000  | 6   | -1.27232500 | 2.36567200  | -0.23975900 |
| 1    | 2.63784400  | -3.05975000 | -1.15314300 | 1 | 0.00637600  | 0.32076500  | 2.14738600  | 1   | -0.48134300 | 3.06094400  | -0.52378000 |
| 6    | 4.07155700  | -1.79360700 | -0.11844900 | 6 | -1.52655800 | -0.41378600 | 3.47614600  | 6   | -2.54797000 | 2.84353700  | 0.10366200  |
| 1    | 4.83605100  | -2.57365100 | -0.09121900 | 1 | -2.61969700 | -0.41871600 | 3.58824100  | 1   | -2.73109800 | 3.92073600  | 0.08814800  |
| 6    | 4.34502800  | -0.54781300 | 0.41345400  | 1 | -1.11833100 | 0.15191500  | 4.32476100  | 6   | -3.56496000 | 1.98093900  | 0.46725700  |
| 1    | 5.31826000  | -0.32979600 | 0.85898700  | 1 | -1.17331900 | -1.45120900 | 3.57577900  | 1   | -4.55075900 | 2.36277000  | 0.74391600  |
| 6    | 3.35816300  | 0.46532600  | 0.38146700  | 8 | -1.44025400 | -2.40046600 | -1.48128400 | 6   | -3.34533000 | 0.58294600  | 0.47340600  |
| 6    | 3.53817800  | 1.77450000  | 0.89733900  | 1 | -1.24790700 | -2.29924900 | -2.42709900 | 6   | -4.33416900 | -0.37504800 | 0.81909900  |
| 1    | 4.49486800  | 2.04749700  | 1.34922900  | 1 | -3.61484600 | 0.90298700  | -1.99889300 | 1   | -5.33013300 | -0.03975800 | 1.11786800  |
| 6    | 2.50363900  | 2.68519300  | 0.81400900  | 5 | -2.47652400 | 1.28608900  | -2.25818000 | 6   | -4.01648300 | -1.72149400 | 0.76126600  |
| 1    | 2.61776200  | 3.70231900  | 1.19293600  | 1 | -2.40303500 | 1.94183800  | -3.28652700 | 1   | -4.75374900 | -2.48490200 | 1.01727000  |
| 6    | 1.28192500  | 2.29927400  | 0.23922900  | 1 | -1.74950600 | 0.24528700  | -2.43276500 | 6   | -2.74133100 | -2.11922400 | 0.35174700  |
| 1    | 0.44247500  | 2.99690100  | 0.16336300  | 8 | -1.86110000 | 1.99710700  | -1.06722600 | 1   | -2.48323100 | -3.17981600 | 0.27472700  |

|     |             |             |             |   |             |             |             |     |             |             |             |
|-----|-------------|-------------|-------------|---|-------------|-------------|-------------|-----|-------------|-------------|-------------|
| 6   | -2.05899700 | 0.09562600  | 0.09960900  | 7 | -1.94836300 | -1.11365000 | -0.29983800 | 1   | 5.67768600  | -1.72754500 | -1.08528000 |
| 6   | 1.16441500  | 0.97427700  | -1.31504400 | 7 | 2.87326400  | -0.17902800 | 0.22663300  | 1   | 5.74740800  | -0.26342300 | -0.10383000 |
| 6   | 2.53165100  | 0.36044100  | -0.97083200 | 6 | -1.26676300 | 1.19869600  | -0.08644300 | 6   | 3.35804700  | 0.77151600  | 1.28259200  |
| 1   | 2.64908500  | -0.58133100 | -1.52571400 | 6 | -1.60089000 | 2.54520700  | 0.04199400  | 1   | 3.99944400  | 0.18258900  | 1.95482800  |
| 1   | 3.34756000  | 1.04796800  | -1.23387900 | 1 | -0.81053100 | 3.29282600  | 0.01946900  | 1   | 2.46377100  | 1.04440000  | 1.86438200  |
| 6   | 3.05780400  | -1.23467400 | 0.90839600  | 6 | -2.94253200 | 2.92828400  | 0.19228600  | 6   | 4.04944700  | 2.01231700  | 0.77839000  |
| 1   | 2.33278500  | -1.99962700 | 0.57783400  | 1 | -3.18291700 | 3.98972900  | 0.29215200  | 1   | 4.92619100  | 1.79330300  | 0.15575100  |
| 1   | 3.06100900  | -1.22462800 | 2.00902900  | 6 | -3.95328700 | 1.98800100  | 0.22482900  | 1   | 4.39804300  | 2.59768000  | 1.63853000  |
| 6   | 4.42079000  | -1.56231900 | 0.34800700  | 1 | -4.99608000 | 2.29009400  | 0.35168800  | 1   | 3.36972100  | 2.65335900  | 0.20134700  |
| 1   | 4.39027900  | -1.66691700 | -0.74491700 | 6 | -3.65836200 | 0.61142500  | 0.08258800  | 1   | 1.07552100  | -2.28872400 | -1.63838600 |
| 1   | 4.75404600  | -2.53024700 | 0.74467400  | 6 | -4.65766300 | -0.39673900 | 0.09650500  | 8   | 1.10917300  | 2.55008100  | -1.10741400 |
| 1   | 5.19226400  | -0.82185500 | 0.59659200  | 1 | -5.70385900 | -0.11595200 | 0.23775700  | 1   | 0.29310100  | -0.16968600 | 0.67974400  |
| 6   | 2.77762000  | 1.23037100  | 1.32132000  | 6 | -4.28017000 | -1.71944800 | -0.07852100 | 6   | 0.09551800  | -1.51662000 | 2.49270200  |
| 1   | 2.35831400  | 1.02346600  | 2.31825000  | 1 | -5.01877500 | -2.52357500 | -0.07380100 | 1   | -1.00769700 | -1.50872100 | 2.43351300  |
| 1   | 2.18530700  | 2.06432000  | 0.91008100  | 6 | -2.93872600 | -2.03227400 | -0.28033100 | 1   | 0.38674600  | -0.82435900 | 3.30533800  |
| 6   | 4.23474200  | 1.60902800  | 1.42677700  | 1 | -2.62879600 | -3.06840400 | -0.45038100 | 1   | 0.39684500  | -2.53116200 | 2.80485000  |
| 1   | 4.81646500  | 0.86384700  | 1.98535300  | 6 | -2.29778500 | 0.21187000  | -0.09477100 | 8   | 0.67969900  | -1.18077600 | 1.27241700  |
| 1   | 4.33397400  | 2.56207300  | 1.96191700  | 6 | 1.08565900  | 1.38807400  | -0.72620700 | 1   | 2.07076700  | -0.70030300 | 0.69952700  |
| 1   | 4.70344600  | 1.74039800  | 0.44149000  | 6 | 2.31349300  | 0.50186100  | -0.97665500 |     |             |             |             |
| 1   | 1.22183400  | -2.59755400 | -1.23737200 | 1 | 1.99962900  | -0.31452000 | -1.65157900 |     |             |             |             |
| 8   | 1.01379300  | 1.79516300  | -2.19751900 | 1 | 3.09805800  | 1.11077000  | -1.44083000 | TS3 |             |             |             |
|     |             |             |             | 6 | 3.81961000  | -1.27951800 | -0.14207400 | 27  | -0.44351400 | -1.86922100 | -0.35811500 |
|     |             |             |             | 1 | 3.22124300  | -1.93648700 | -0.79547400 | 8   | 1.77165900  | 1.52490400  | 0.53096100  |
| TS2 |             |             |             | 1 | 4.00654400  | -1.83930900 | 0.78615700  | 7   | 0.07533300  | 0.17941900  | -0.38220400 |
| 27  | -0.11814300 | -1.62578900 | -0.74285500 | 6 | 5.10664000  | -0.84022600 | -0.78489400 | 7   | -2.22373600 | -1.09222200 | -0.29350800 |
| 7   | 0.04092700  | 0.69425100  | -0.19628800 | 1 | 4.94261200  | -0.24627000 | -1.69391800 | 7   | 3.58557900  | 0.01009800  | 0.15917400  |

|   |             |             |             |     |             |             |             |   |             |             |             |
|---|-------------|-------------|-------------|-----|-------------|-------------|-------------|---|-------------|-------------|-------------|
| 6 | -1.03382600 | 0.97095900  | -0.07067100 | 6   | 4.81851700  | 0.33930100  | -0.58216400 | 1 | -6.06751500 | 0.76800800  | -0.00520900 |
| 6 | -1.03520300 | 2.34462300  | 0.17594000  | 1   | 5.10553300  | -0.52814200 | -1.20141400 | 6 | -5.05727200 | -1.14742700 | -0.00863400 |
| 1 | -0.09156100 | 2.88761800  | 0.19210900  | 1   | 5.61454800  | 0.45987500  | 0.16783000  | 1 | -5.96770300 | -1.74895400 | 0.02384700  |
| 6 | -2.24553900 | 3.02101400  | 0.39879800  | 6   | 4.68519300  | 1.59424500  | -1.40863900 | 6 | -3.81758300 | -1.78699800 | -0.02585200 |
| 1 | -2.22259800 | 4.09737400  | 0.58701400  | 1   | 3.92019500  | 1.50535200  | -2.19157000 | 1 | -3.74751700 | -2.87869600 | -0.00088800 |
| 6 | -3.45683200 | 2.35476700  | 0.38232200  | 1   | 5.63432400  | 1.81718200  | -1.91094600 | 6 | -2.67666200 | 0.25141700  | -0.11433200 |
| 1 | -4.39324800 | 2.89085900  | 0.55582600  | 1   | 4.42231400  | 2.46060800  | -0.78681300 | 6 | 0.93036100  | 0.48864300  | -0.35896900 |
| 6 | -3.50058700 | 0.96088200  | 0.14201700  | 1   | 0.73233100  | -2.98674100 | -0.29119300 | 6 | 1.91277100  | -0.60657700 | -0.74883900 |
| 6 | -4.70180200 | 0.20555000  | 0.09780800  | 1   | 2.97830400  | 1.00576200  | 0.56713000  | 1 | 1.40903400  | -1.58448400 | -0.62331400 |
| 1 | -5.65984900 | 0.70583700  | 0.25641900  |     |             |             |             | 1 | 2.12597100  | -0.46332000 | -1.81898800 |
| 6 | -4.63156000 | -1.15610000 | -0.15263100 |     |             |             |             | 6 | 3.11821400  | -1.25584600 | 1.30534900  |
| 1 | -5.53521800 | -1.76673100 | -0.20273000 | TS4 |             |             |             | 1 | 4.10012200  | -1.10795600 | 1.78455100  |
| 6 | -3.38942100 | -1.76425600 | -0.33902700 | 27  | -0.88600100 | -1.91567300 | 0.13616200  | 1 | 2.98647600  | -2.34311800 | 1.16334500  |
| 1 | -3.31345500 | -2.83956500 | -0.52707500 | 8   | 1.33979900  | 1.69331900  | -0.19746300 | 6 | 1.99816900  | -0.71578900 | 2.15372200  |
| 6 | -2.27403500 | 0.26890500  | -0.07352500 | 7   | -0.31742900 | 0.08250800  | -0.31392300 | 1 | 1.99227100  | 0.38258300  | 2.19623400  |
| 6 | 1.30703100  | 0.53670000  | -0.13654200 | 7   | -2.64625600 | -1.12585800 | -0.06446300 | 1 | 2.09448200  | -1.09452800 | 3.17870400  |
| 6 | 2.41920700  | -0.35723100 | -0.67475600 | 7   | 3.21782000  | -0.62613000 | -0.03748900 | 1 | 1.02917700  | -1.06806100 | 1.76544700  |
| 1 | 2.14256900  | -1.42407400 | -0.61842600 | 6   | -1.42348700 | 0.93405800  | -0.21500100 | 6 | 4.25360900  | -1.32634500 | -0.83577700 |
| 1 | 2.61640800  | -0.11201900 | -1.72809600 | 6   | -1.43069600 | 2.33244000  | -0.25123100 | 1 | 3.88153600  | -2.33651200 | -1.08279900 |
| 6 | 3.81673100  | -0.96607800 | 1.25365800  | 1   | -0.49069600 | 2.87180000  | -0.32220100 | 1 | 5.11279900  | -1.47033400 | -0.16303500 |
| 1 | 4.63413000  | -0.55907100 | 1.86938800  | 6   | -2.64210700 | 3.04096700  | -0.20269900 | 6 | 4.68674400  | -0.57305300 | -2.07006700 |
| 1 | 4.19154400  | -1.90103800 | 0.80202400  | 1   | -2.61351600 | 4.13315700  | -0.23291100 | 1 | 3.90054500  | -0.51569400 | -2.83441800 |
| 6 | 2.58313900  | -1.22305900 | 2.08340400  | 6   | -3.85772700 | 2.39031600  | -0.12261300 | 1 | 5.54002700  | -1.08326900 | -2.53384400 |
| 1 | 2.20819600  | -0.30172700 | 2.54978900  | 1   | -4.79502000 | 2.95136000  | -0.08944900 | 1 | 4.99378100  | 0.45288500  | -1.82692200 |
| 1 | 2.82150800  | -1.93321200 | 2.88452200  | 6   | -3.90366400 | 0.97716600  | -0.08397900 | 1 | 0.24897700  | -3.03636600 | 0.45523500  |
| 1 | 1.76933000  | -1.67083600 | 1.48743400  | 6   | -5.11312000 | 0.23695600  | -0.02671000 | 1 | 3.60081100  | 0.57693500  | 0.07559400  |

|     |             |            |             |    |             |             |             |     |             |             |             |
|-----|-------------|------------|-------------|----|-------------|-------------|-------------|-----|-------------|-------------|-------------|
| 6   | 4.16285900  | 2.45837800 | 1.16513300  | 6  | -2.99002200 | 0.57310500  | 0.82141600  | 6   | 4.13202200  | -0.93302100 | 1.01754000  |
| 1   | 5.20922500  | 2.19510700 | 1.38513000  | 6  | -0.70024800 | -0.04092700 | -1.91669600 | 6   | 3.36910900  | 1.14335000  | 1.99016600  |
| 1   | 3.55567900  | 2.20784100 | 2.05440000  | 6  | 0.69049700  | 0.55103700  | -2.17432400 | 6   | 5.45095700  | -0.54956800 | 1.23561400  |
| 1   | 4.11976300  | 3.55007700 | 1.03320600  | 1  | 1.44164200  | -0.03876400 | -1.62929100 | 1   | 3.91002900  | -1.90362900 | 0.56621600  |
| 8   | 3.72671300  | 1.80554400 | 0.00250200  | 1  | 0.93396400  | 0.51103300  | -3.24521100 | 6   | 4.68956200  | 1.52155900  | 2.21040000  |
| 1   | 2.54982800  | 1.87032200 | -0.14427000 | 6  | 1.86373500  | 2.40471100  | -0.92326800 | 1   | 2.53292700  | 1.78656100  | 2.28160300  |
|     |             |            |             | 1  | 1.78085500  | 2.00754800  | 0.10046200  | 6   | 5.73800300  | 0.68203900  | 1.82853500  |
|     |             |            |             | 1  | 1.75951400  | 3.49698800  | -0.83837200 | 1   | 6.26450600  | -1.21893000 | 0.94450700  |
| TS5 |             |            |             | 6  | 3.18899100  | 2.02370500  | -1.53927700 | 1   | 4.90589900  | 2.48065300  | 2.68844000  |
| 7   | -1.23049400 | 0.60678000 | -0.82907000 | 1  | 3.35620000  | 0.93758700  | -1.51220600 | 1   | 6.77477300  | 0.98120100  | 2.00000800  |
| 7   | -2.01151900 | 0.49165100 | 1.77239500  | 1  | 4.00172500  | 2.47006000  | -0.95047300 | 6   | 0.58642000  | -2.60831400 | -0.02621100 |
| 7   | 0.65012800  | 1.92505900 | -1.63586500 | 1  | 3.30611400  | 2.35929500  | -2.57916100 | 6   | 1.52717900  | -3.19087300 | -0.90107400 |
| 6   | -2.59168600 | 0.55640000 | -0.54968800 | 6  | 0.06522100  | 2.88812500  | -2.59431800 | 6   | -0.68808800 | -3.20180700 | 0.06520800  |
| 6   | -3.58498100 | 0.52584500 | -1.52556400 | 1  | -0.25816100 | 3.76188900  | -2.00777700 | 6   | 1.20110300  | -4.31520300 | -1.65191600 |
| 1   | -3.29559200 | 0.47204000 | -2.57555400 | 1  | -0.85692800 | 2.42248600  | -2.97933100 | 1   | 2.51525300  | -2.73246900 | -1.00049100 |
| 6   | -4.94517100 | 0.56757200 | -1.17349800 | 6  | 0.96588800  | 3.31529200  | -3.72774300 | 6   | -1.00487100 | -4.33475200 | -0.67347900 |
| 1   | -5.69594000 | 0.54911700 | -1.96715400 | 1  | 1.82863700  | 3.89462600  | -3.37216200 | 1   | -1.43244300 | -2.73971800 | 0.72078400  |
| 6   | -5.34468900 | 0.64981400 | 0.14512300  | 1  | 0.41111800  | 3.95666800  | -4.42449000 | 6   | -0.06341600 | -4.89487000 | -1.53865200 |
| 1   | -6.40237800 | 0.70381900 | 0.41241300  | 1  | 1.34468200  | 2.46088500  | -4.30603500 | 1   | 1.93973400  | -4.74422400 | -2.33366700 |
| 6   | -4.37285100 | 0.65587800 | 1.17302200  | 8  | -1.17428700 | -0.92575100 | -2.60008500 | 1   | -2.00019100 | -4.77703700 | -0.58865100 |
| 6   | -4.69006800 | 0.73421700 | 2.55030200  | 1  | -0.31907500 | 1.61461300  | -0.88220300 | 1   | -0.31745900 | -5.77711000 | -2.13055900 |
| 1   | -5.73703800 | 0.81245100 | 2.85388200  | 27 | -0.10389100 | 0.19871000  | 1.16283500  |     |             |             |             |
| 6   | -3.67781500 | 0.70840300 | 3.48690400  | 1  | 0.44617600  | 1.61826500  | 1.64628100  |     |             |             |             |
| 1   | -3.89151900 | 0.77153500 | 4.55498200  | 6  | 0.87793700  | -1.39240100 | 0.68606800  | TS6 |             |             |             |
| 6   | -2.35026100 | 0.56674600 | 3.05580000  | 6  | 1.69978500  | -0.47998100 | 1.10904200  | 27  | 0.04415900  | 0.33872200  | -1.31434200 |
| 1   | -1.52866200 | 0.50337200 | 3.77526900  | 6  | 3.06178800  | -0.08681700 | 1.37887800  | 7   | -0.10279000 | -1.33357400 | 0.31173400  |

|   |             |             |             |   |             |             |             |     |             |             |             |
|---|-------------|-------------|-------------|---|-------------|-------------|-------------|-----|-------------|-------------|-------------|
| 1 | 0.30174800  | -2.16682500 | -0.65992100 | 1 | 4.92867800  | -0.31231400 | 0.53283800  | 1   | 3.03312600  | 1.46996300  | -1.74839400 |
| 7 | -1.86578500 | -0.41529200 | -1.48974300 | 1 | 5.92277400  | -0.85141500 | -0.82120800 | 1   | 1.21317500  | 3.93923600  | 1.25567800  |
| 7 | 2.81715100  | -2.11528000 | 0.05048500  | 1 | 5.66800600  | -1.93417500 | 0.55190900  | 1   | 5.23365100  | 2.60866900  | -1.35523400 |
| 6 | -1.45554100 | -1.49036900 | 0.61671700  | 6 | 3.03806700  | -3.28742900 | 0.94151000  | 1   | 3.38878000  | 5.07633100  | 1.65822200  |
| 6 | -1.97312300 | -2.06080300 | 1.77527000  | 1 | 3.72337200  | -3.96253300 | 0.40625600  | 1   | 5.40600000  | 4.41365600  | 0.35557600  |
| 1 | -1.28934700 | -2.37436600 | 2.56190700  | 1 | 2.07491900  | -3.82182300 | 0.99548500  | 1   | -2.71222200 | 3.04369100  | -1.27334700 |
| 6 | -3.36082400 | -2.21869100 | 1.94343900  | 6 | 3.53134500  | -2.99473900 | 2.34011800  | 1   | -1.21881000 | 1.05148000  | 2.25235900  |
| 1 | -3.73019200 | -2.66805400 | 2.86875600  | 1 | 4.47473400  | -2.43291600 | 2.35410100  | 1   | -4.97005600 | 3.15504700  | -0.25197100 |
| 6 | -4.25626000 | -1.82727500 | 0.97057600  | 1 | 3.70498900  | -3.94134500 | 2.86849900  | 1   | -3.47449900 | 1.16490500  | 3.26753800  |
| 1 | -5.33244300 | -1.95747400 | 1.10647600  | 1 | 2.79037500  | -2.42807800 | 2.92077600  | 1   | -5.36939900 | 2.20676900  | 2.01999000  |
| 6 | -3.77985700 | -1.23807100 | -0.22309800 | 1 | 1.43519900  | -0.10245200 | -2.01704700 | 6   | 0.71836800  | -2.95567300 | -2.65771500 |
| 6 | -4.62738200 | -0.79584500 | -1.26697400 | 8 | 0.61833400  | -0.97625300 | 2.48934700  | 1   | 0.84567100  | -1.94351200 | -3.07842000 |
| 1 | -5.70798300 | -0.92883900 | -1.16849900 | 6 | 0.72358900  | 1.95771300  | -0.48708700 | 1   | 1.44559400  | -3.63365800 | -3.13018700 |
| 6 | -4.08557800 | -0.19735700 | -2.38294800 | 6 | -0.52557000 | 1.87832800  | -0.20003900 | 1   | -0.28872800 | -3.31988600 | -2.91262300 |
| 1 | -4.71430900 | 0.15613300  | -3.20167200 | 6 | 1.98766200  | 2.63003000  | -0.27781200 | 8   | 0.88926100  | -2.97149500 | -1.26066700 |
| 6 | -2.69616700 | -0.00259700 | -2.43957700 | 6 | 3.13540100  | 2.26546400  | -1.00303200 | 1   | 1.91490900  | -2.55031800 | -0.77573600 |
| 1 | -2.24251600 | 0.52734600  | -3.28381800 | 6 | 2.09968200  | 3.65377700  | 0.68345800  |     |             |             |             |
| 6 | -2.37288800 | -1.05585400 | -0.39382400 | 6 | 4.35229200  | 2.90203300  | -0.77782600 |     |             |             |             |
| 6 | 0.83195400  | -1.12185300 | 1.29238500  | 6 | 3.31836900  | 4.28582300  | 0.90667000  | TS7 |             |             |             |
| 6 | 2.25338300  | -0.94305900 | 0.75343000  | 6 | 4.45048700  | 3.91409400  | 0.17800600  | 8   | -0.82927700 | 3.10424500  | 1.27128900  |
| 1 | 2.23099800  | -0.12445000 | 0.01827200  | 6 | -1.80017100 | 2.06142400  | 0.42478900  | 7   | 0.44747100  | 1.50936600  | 0.10153800  |
| 1 | 2.89167000  | -0.64276600 | 1.59540100  | 6 | -2.88118400 | 2.64139400  | -0.27074800 | 7   | 2.35314400  | 0.24723200  | -1.19198300 |
| 6 | 3.96844000  | -1.73756300 | -0.80094500 | 6 | -2.03864900 | 1.53493900  | 1.71349700  | 7   | -2.99051200 | 2.21886000  | 0.74897300  |
| 1 | 3.56552900  | -1.00246700 | -1.51842300 | 6 | -4.14720300 | 2.69693200  | 0.30350200  | 6   | 1.71531700  | 2.03161000  | 0.27011200  |
| 1 | 4.23688500  | -2.63146500 | -1.38734700 | 6 | -3.31034800 | 1.58939400  | 2.27340800  | 6   | 2.09471500  | 3.12934100  | 1.04367400  |
| 6 | 5.17828900  | -1.18534100 | -0.08624000 | 6 | -4.37214400 | 2.16841300  | 1.57513800  | 1   | 1.32995400  | 3.69000700  | 1.57796800  |

|   |             |             |             |    |             |             |             |     |             |             |             |
|---|-------------|-------------|-------------|----|-------------|-------------|-------------|-----|-------------|-------------|-------------|
| 6 | 3.44685700  | 3.50622200  | 1.14117400  | 6  | -3.32390400 | 1.34458100  | 3.05274700  | 1   | 0.12344500  | -4.52873300 | -0.13814700 |
| 1 | 3.70718000  | 4.37083900  | 1.75686500  | 1  | -2.56772800 | 0.55181400  | 2.97528800  | 1   | 2.32381800  | -1.09175400 | 1.23942200  |
| 6 | 4.44388000  | 2.80936900  | 0.48920100  | 1  | -4.08786300 | 0.98935200  | 3.75493100  | 1   | 1.62524700  | -6.01499100 | 1.16578900  |
| 1 | 5.49175500  | 3.10430700  | 0.58053000  | 1  | -2.84068200 | 2.22459000  | 3.49906500  | 1   | 3.80968600  | -2.57537800 | 2.57025300  |
| 6 | 4.10923900  | 1.68947200  | -0.30849600 | 1  | -2.11742300 | 2.98127600  | 1.23173700  | 1   | 3.47331700  | -5.04615100 | 2.52996200  |
| 6 | 5.06465500  | 0.90193600  | -0.99647700 | 27 | 0.33221300  | -0.15856200 | -1.28978700 |     |             |             |             |
| 1 | 6.12391300  | 1.16110700  | -0.92086200 | 1  | -0.72885800 | 0.58334600  | -2.27236800 |     |             |             |             |
| 6 | 4.65013500  | -0.18035400 | -1.74157500 | 6  | -0.89760200 | -1.56618400 | -0.82341800 | TS8 |             |             |             |
| 1 | 5.36395300  | -0.81056400 | -2.27409700 | 6  | 0.25687800  | -1.84216100 | -0.30329200 | 8   | 0.98452000  | -2.87874700 | 1.14647700  |
| 6 | 3.27757500  | -0.47230700 | -1.81484000 | 6  | -2.31826100 | -1.82593200 | -0.83225200 | 7   | -0.38118400 | -1.45358200 | -0.05797400 |
| 1 | 2.91665700  | -1.32685200 | -2.39553200 | 6  | -3.18402800 | -1.16808600 | -1.72610500 | 7   | -2.51923900 | -0.38910600 | -1.19596700 |
| 6 | 2.73899200  | 1.31123900  | -0.42934700 | 6  | -2.88486800 | -2.70307700 | 0.11644900  | 7   | 3.23865600  | -1.19344300 | 0.20933500  |
| 6 | -0.63988600 | 2.02700600  | 0.60163300  | 6  | -4.55865800 | -1.37947100 | -1.67510400 | 6   | -1.54724300 | -2.19675800 | 0.04577700  |
| 6 | -1.93032500 | 1.27342900  | 0.34461400  | 6  | -4.26104800 | -2.90352500 | 0.17105900  | 6   | -1.73523500 | -3.43351500 | 0.67019100  |
| 1 | -1.98763800 | 0.96341700  | -0.71025300 | 6  | -5.10655500 | -2.24352700 | -0.72386800 | 1   | -0.88829800 | -3.92667200 | 1.13711100  |
| 1 | -1.97095200 | 0.35147000  | 0.94142900  | 6  | 1.11299400  | -2.70264400 | 0.46499600  | 6   | -3.00250300 | -4.04392800 | 0.71110000  |
| 6 | -3.65930300 | 2.83918900  | -0.41942700 | 6  | 0.93427900  | -4.10338000 | 0.45937800  | 1   | -3.09964200 | -5.01048900 | 1.21187800  |
| 1 | -4.38594400 | 3.56374500  | -0.01976800 | 6  | 2.17335600  | -2.17502100 | 1.23113800  | 6   | -4.11363400 | -3.45206200 | 0.15018000  |
| 1 | -4.24146500 | 2.05520100  | -0.93562700 | 6  | 1.77858500  | -4.93285700 | 1.18928400  | 1   | -5.09626000 | -3.92684900 | 0.19947200  |
| 6 | -2.69321200 | 3.51144600  | -1.36443300 | 6  | 3.00230900  | -3.00857800 | 1.97427500  | 6   | -3.98147300 | -2.20238300 | -0.49861800 |
| 1 | -2.11332000 | 4.29732600  | -0.86171100 | 6  | 2.81441200  | -4.39187800 | 1.95441400  | 6   | -5.07127800 | -1.51275400 | -1.08310000 |
| 1 | -3.24864600 | 3.97933600  | -2.18650300 | 1  | -2.73566700 | -0.48123000 | -2.45203300 | 1   | -6.06819500 | -1.95897700 | -1.03852300 |
| 1 | -1.98372600 | 2.80133500  | -1.81687900 | 1  | -2.22367600 | -3.21680900 | 0.81998000  | 6   | -4.86567200 | -0.29298900 | -1.68890300 |
| 6 | -3.95627200 | 1.67161900  | 1.72301400  | 1  | -5.21289000 | -0.86629900 | -2.38565600 | 1   | -5.68743300 | 0.26589400  | -2.13883100 |
| 1 | -4.44021600 | 0.78462500  | 1.27558500  | 1  | -4.67968900 | -3.58377500 | 0.91751400  | 6   | -3.56406600 | 0.23268100  | -1.72678800 |
| 1 | -4.74401400 | 2.42977500  | 1.84903700  | 1  | -6.18632800 | -2.40618500 | -0.68285100 | 1   | -3.36260200 | 1.19865700  | -2.20040100 |

|    |             |             |             |   |             |             |             |     |             |             |             |
|----|-------------|-------------|-------------|---|-------------|-------------|-------------|-----|-------------|-------------|-------------|
| 6  | -2.69532300 | -1.58577500 | -0.56682700 | 6 | 3.77508600  | 2.77843800  | -1.93070100 |     |             |             |             |
| 6  | 0.76268300  | -1.79811600 | 0.48757500  | 6 | 3.42826700  | 3.83588200  | 0.21009600  |     |             |             |             |
| 6  | 1.83563900  | -0.73491100 | 0.34364100  | 6 | 4.25803400  | 3.56243000  | -0.87986400 | TS9 |             |             |             |
| 1  | 1.57021600  | -0.12019200 | -0.53317700 | 6 | -1.81153200 | 2.53288300  | 0.76155100  | 27  | -0.38699900 | 0.30987600  | -1.04465200 |
| 1  | 1.76480800  | -0.07729800 | 1.22337600  | 6 | -1.90091500 | 3.93369700  | 0.91392100  | 7   | -1.42399000 | -1.47813800 | -0.00587600 |
| 6  | 3.53630400  | -1.58605200 | -1.19196900 | 6 | -2.71596600 | 1.72985700  | 1.48662400  | 1   | -0.97120800 | -2.35459600 | -0.29047300 |
| 1  | 4.54831000  | -2.02420900 | -1.18248600 | 6 | -2.85333700 | 4.50001800  | 1.75395200  | 7   | -2.25811700 | 0.90605900  | -0.98703500 |
| 1  | 3.59305900  | -0.66170100 | -1.79606900 | 6 | -3.65457400 | 2.30145000  | 2.33926800  | 7   | 0.69566200  | -2.91984500 | 0.82455200  |
| 6  | 2.53066100  | -2.53450700 | -1.79454800 | 6 | -3.73325200 | 3.68870500  | 2.47419400  | 6   | -2.80773700 | -1.30646800 | -0.26321100 |
| 1  | 2.35912800  | -3.41698000 | -1.16193200 | 1 | 2.09617900  | 1.62161700  | -2.68721500 | 6   | -3.73935900 | -2.30732500 | -0.05005400 |
| 1  | 2.89713300  | -2.88724000 | -2.76681100 | 1 | 1.47730200  | 3.55693500  | 1.09818100  | 1   | -3.40358200 | -3.29010800 | 0.28996500  |
| 1  | 1.56695100  | -2.03310000 | -1.97606600 | 1 | 4.41706500  | 2.56322700  | -2.78942600 | 6   | -5.10946400 | -2.04886000 | -0.23941900 |
| 6  | 4.18480300  | -0.13081200 | 0.63364400  | 1 | 3.79737900  | 4.44739000  | 1.03784500  | 1   | -5.83341000 | -2.84907500 | -0.07213500 |
| 1  | 3.95888700  | 0.78771100  | 0.06247200  | 1 | 5.27510900  | 3.96069800  | -0.91063500 | 6   | -5.54480300 | -0.78761400 | -0.59265300 |
| 1  | 5.18335800  | -0.46242900 | 0.30918400  | 1 | -1.21072600 | 4.56930500  | 0.35261300  | 1   | -6.61186900 | -0.57783300 | -0.69900200 |
| 6  | 4.18282700  | 0.13146000  | 2.11933500  | 1 | -2.65621100 | 0.64356200  | 1.37490500  | 6   | -4.61836600 | 0.25968100  | -0.81660300 |
| 1  | 3.24087000  | 0.57387200  | 2.47070000  | 1 | -2.90838100 | 5.58729900  | 1.85310500  | 6   | -4.98777200 | 1.58406500  | -1.15670900 |
| 1  | 4.97472800  | 0.85037500  | 2.36493300  | 1 | -4.33748700 | 1.65828600  | 2.90017700  | 1   | -6.04511300 | 1.84287300  | -1.24727200 |
| 1  | 4.36230000  | -0.78581300 | 2.69664200  | 1 | -4.47777900 | 4.13663700  | 3.13643000  | 6   | -3.99755000 | 2.52830700  | -1.35720400 |
| 27 | -0.62304400 | 0.38030200  | -1.27556800 | 1 | 3.41184300  | -2.19724400 | 0.99953600  | 1   | -4.24519400 | 3.56205200  | -1.60329400 |
| 1  | 0.54135700  | -0.01276000 | -2.32697700 | 6 | 3.86809300  | -4.31439900 | 1.46599600  | 6   | -2.65245300 | 2.15052500  | -1.28305600 |
| 6  | 0.30022700  | 1.98335700  | -0.72781600 | 1 | 4.96618900  | -4.24127600 | 1.50878800  | 1   | -1.85416900 | 2.86894100  | -1.48953300 |
| 6  | -0.84383700 | 1.94344200  | -0.12274500 | 1 | 3.59154100  | -4.65623800 | 0.45105400  | 6   | -3.22537800 | -0.02316000 | -0.69092000 |
| 6  | 1.62965400  | 2.54033000  | -0.80400800 | 1 | 3.56422300  | -5.10105000 | 2.17310300  | 6   | -0.91480900 | -1.07651600 | 1.24692000  |
| 6  | 2.48319200  | 2.26201500  | -1.88858100 | 8 | 3.27921000  | -3.09012200 | 1.81235400  | 6   | 0.44643500  | -1.69025900 | 1.53984300  |
| 6  | 2.12795200  | 3.33969000  | 0.24626300  | 1 | 2.09830000  | -3.04947700 | 1.57595600  | 1   | 1.19710600  | -0.92458700 | 1.27888700  |



|   |             |             |             |      |             |             |             |   |             |             |             |
|---|-------------|-------------|-------------|------|-------------|-------------|-------------|---|-------------|-------------|-------------|
| 1 | 0.51068400  | -1.79226000 | 2.63808800  | 6    | 1.93515300  | 3.59793900  | 0.55379300  | 6 | -4.69845000 | -2.14777100 | 0.81897400  |
| 6 | 1.87639000  | -2.95025300 | -0.02975800 | 6    | 0.14534300  | 2.66931500  | 1.89494500  | 1 | -5.40382200 | -2.97957900 | 0.76644300  |
| 1 | 1.72175600  | -2.19197400 | -0.81763700 | 6    | 2.02673300  | 4.67481100  | 1.42864700  | 6 | -4.79467300 | -1.21846500 | 1.83322200  |
| 1 | 1.87543100  | -3.92188500 | -0.55096200 | 6    | 0.26096800  | 3.73716100  | 2.77831200  | 1 | -5.57672900 | -1.30223000 | 2.59208800  |
| 6 | 3.22417400  | -2.70331800 | 0.62433500  | 6    | 1.19814000  | 4.74659900  | 2.55094500  | 6 | -3.88373400 | -0.13726600 | 1.91998100  |
| 1 | 3.23288400  | -1.75969400 | 1.19076200  | 1    | 2.34267200  | -0.93827400 | -2.99288200 | 6 | -3.94961200 | 0.84039800  | 2.94352400  |
| 1 | 4.00747500  | -2.61254400 | -0.14233800 | 1    | 3.74106700  | 1.39959400  | 0.33729100  | 1 | -4.73714600 | 0.77755900  | 3.69790400  |
| 1 | 3.52292000  | -3.50490800 | 1.31336500  | 1    | 4.69005600  | -1.52474500 | -3.57124900 | 6 | -3.02058200 | 1.86264000  | 2.95488800  |
| 6 | 0.33548200  | -4.12724000 | 1.54850900  | 1    | 6.08378800  | 0.80537800  | -0.22450300 | 1 | -3.05060300 | 2.64747500  | 3.71251600  |
| 1 | 0.27397600  | -4.95443100 | 0.82092500  | 1    | 6.57206500  | -0.65816400 | -2.18439600 | 6 | -2.01584000 | 1.89357300  | 1.98257200  |
| 1 | -0.69699600 | -3.98841900 | 1.91966200  | 1    | 2.58658300  | 3.54589000  | -0.32335000 | 1 | -1.26250300 | 2.68625400  | 1.98503200  |
| 6 | 1.23018200  | -4.53281300 | 2.70870500  | 1    | -0.59881900 | 1.88586000  | 2.06396600  | 6 | -2.84558300 | -0.02011200 | 0.94479300  |
| 1 | 2.21551200  | -4.87924400 | 2.36941200  | 1    | 2.75746900  | 5.46550100  | 1.23802500  | 6 | -1.89952500 | 0.29935000  | -1.97688100 |
| 1 | 0.77780800  | -5.35348800 | 3.28263400  | 1    | -0.39696800 | 3.78890400  | 3.64973600  | 6 | -0.57814300 | 0.64575800  | -2.63412000 |
| 1 | 1.39453800  | -3.69964700 | 3.40811800  | 1    | 1.27926600  | 5.59002700  | 3.24092400  | 1 | 0.05656500  | -0.24683500 | -2.75275700 |
| 1 | 0.74668400  | -0.39988700 | -1.81828100 |      |             |             |             | 1 | -0.76941900 | 1.06235200  | -3.63866300 |
| 8 | -1.50042400 | -0.32878000 | 1.99610500  |      |             |             |             | 6 | 1.56777300  | 1.64611900  | -2.03674800 |
| 6 | 1.51679800  | 0.64441700  | -0.93744900 | TS10 |             |             |             | 1 | 1.95249700  | 0.61562600  | -1.96824600 |
| 6 | 0.85912800  | 1.45395800  | -0.13154800 | 27   | -0.03236400 | 0.61043700  | 0.29108600  | 1 | 2.03795900  | 2.18538700  | -1.19875100 |
| 6 | 2.87777700  | 0.27724000  | -1.29566100 | 7    | -1.83613700 | -0.78625500 | -1.13292000 | 6 | 1.97687000  | 2.26316500  | -3.35797900 |
| 6 | 3.17240000  | -0.55365700 | -2.39056900 | 1    | -0.98234200 | -1.34370100 | -1.09588100 | 1 | 1.46808200  | 1.79623800  | -4.21451300 |
| 6 | 3.95401500  | 0.76161600  | -0.52514900 | 7    | -1.88643000 | 0.97066200  | 1.01375300  | 1 | 3.05597100  | 2.12776500  | -3.51239300 |
| 6 | 4.48577800  | -0.88320900 | -2.71006600 | 7    | 0.12566000  | 1.57386300  | -1.73895200 | 1 | 1.78180900  | 3.34340700  | -3.39635100 |
| 6 | 5.26550000  | 0.42435000  | -0.84080100 | 6    | -2.80559700 | -0.96435600 | -0.11772300 | 6 | -0.52853000 | 2.89857500  | -1.60235300 |
| 6 | 5.54050600  | -0.39783000 | -1.93608300 | 6    | -3.70828000 | -2.01072500 | -0.16894400 | 1 | 0.20920300  | 3.54151300  | -1.09647100 |
| 6 | 0.99430100  | 2.56650400  | 0.77209600  | 1    | -3.64909000 | -2.71421900 | -1.00169400 | 1 | -1.36412600 | 2.78401300  | -0.89366500 |

|   |             |             |             |      |             |             |             |    |             |             |             |
|---|-------------|-------------|-------------|------|-------------|-------------|-------------|----|-------------|-------------|-------------|
| 6 | -1.05883200 | 3.55130300  | -2.86357500 | 1    | -0.03667400 | -5.36973700 | -0.19103700 | 6  | -1.58849000 | 0.61159200  | -2.24891500 |
| 1 | -1.42903000 | 4.55712600  | -2.62312900 | 1    | 3.39199400  | -3.97637900 | -2.39673300 | 6  | -0.63935400 | 1.79715100  | -2.09283000 |
| 1 | -1.91025000 | 2.98819100  | -3.26749500 | 1    | 1.81871700  | -5.81728100 | -1.79771700 | 1  | 0.39952200  | 1.46924200  | -2.26903400 |
| 1 | -0.30652300 | 3.66077700  | -3.65536000 | 8    | -2.89437900 | 0.98584900  | -2.09624200 | 1  | -0.89754300 | 2.53909300  | -2.86736100 |
| 1 | 1.02364100  | 1.54808800  | 0.98497500  |      |             |             |             | 6  | 0.30528600  | 3.39876600  | -0.50295700 |
| 6 | 1.76393400  | 0.11845800  | 0.82258100  |      |             |             |             | 1  | 1.26787000  | 2.97114400  | -0.81846100 |
| 6 | 1.15694400  | -0.91511400 | 0.26916000  | TS11 |             |             |             | 1  | 0.39341600  | 3.53689900  | 0.58727700  |
| 6 | 3.06433200  | 0.45583700  | 1.37767600  | 7    | -1.35637600 | -0.33717600 | -1.29033400 | 6  | 0.09240200  | 4.73759300  | -1.18039500 |
| 6 | 3.42900400  | 1.77499400  | 1.69305600  | 1    | -0.21195400 | -0.41455700 | -0.82514700 | 1  | -0.06843900 | 4.64502500  | -2.26413700 |
| 6 | 4.01762300  | -0.56284900 | 1.58330300  | 7    | -1.76286000 | -0.78443700 | 1.34442100  | 1  | 0.98383800  | 5.36405000  | -1.04075300 |
| 6 | 4.69759000  | 2.07276800  | 2.18067100  | 7    | -0.69840300 | 2.34363100  | -0.72538500 | 1  | -0.75462200 | 5.29428200  | -0.75651200 |
| 6 | 5.28222200  | -0.26430400 | 2.07571600  | 6    | -2.25567500 | -1.34231700 | -0.95348200 | 6  | -2.07503300 | 2.72331100  | -0.31660000 |
| 6 | 5.63196200  | 1.05523100  | 2.37348000  | 6    | -2.97174500 | -2.09961900 | -1.87149800 | 1  | -1.97249400 | 3.30462200  | 0.61439300  |
| 6 | 1.37381000  | -2.24641800 | -0.23426600 | 1    | -2.83230300 | -1.90512800 | -2.93408300 | 1  | -2.59649300 | 1.78950200  | -0.03335200 |
| 6 | 0.48578100  | -3.30032300 | 0.07901600  | 6    | -3.87614000 | -3.08393400 | -1.43565000 | 6  | -2.93843300 | 3.45679100  | -1.32601600 |
| 6 | 2.42610800  | -2.52570000 | -1.13685300 | 1    | -4.42692900 | -3.66436700 | -2.17939200 | 1  | -2.51194400 | 4.41276200  | -1.65268200 |
| 6 | 0.65629000  | -4.56962500 | -0.46475600 | 6    | -4.08110900 | -3.31951100 | -0.09230700 | 1  | -3.91652800 | 3.67236200  | -0.87546000 |
| 6 | 2.57322400  | -3.79050700 | -1.69633300 | 1    | -4.78907800 | -4.08049000 | 0.24412600  | 1  | -3.12518700 | 2.84382300  | -2.21769800 |
| 6 | 1.69511700  | -4.82342100 | -1.36206100 | 6    | -3.38298200 | -2.56035800 | 0.87670900  | 27 | -0.39725000 | 0.57890900  | 0.57826600  |
| 1 | 2.68883400  | 2.56809700  | 1.54388000  | 6    | -3.57743600 | -2.72048400 | 2.27002800  | 6  | 1.92876700  | -1.21179200 | -0.97895800 |
| 1 | 3.74627000  | -1.59663300 | 1.35248300  | 1    | -4.27878800 | -3.47831900 | 2.62828000  | 6  | 1.22514200  | -0.41490400 | -0.14082200 |
| 1 | 4.96041600  | 3.10767800  | 2.41415900  | 6    | -2.89232800 | -1.91234300 | 3.14958100  | 1  | 1.39661500  | -1.63486100 | -1.84559600 |
| 1 | 6.00588100  | -1.06875400 | 2.22985400  | 1    | -3.02660200 | -2.00254900 | 4.22860800  | 6  | 1.68108900  | 0.43318400  | 0.95815600  |
| 1 | 6.62856100  | 1.28698600  | 2.75667200  | 6    | -1.99547500 | -0.95867600 | 2.64303500  | 6  | 2.61850900  | 1.49458100  | 0.78217700  |
| 1 | -0.33639800 | -3.10639400 | 0.77560400  | 1    | -1.43355600 | -0.31316700 | 3.32554200  | 6  | 1.08367300  | 0.29637000  | 2.25722200  |
| 1 | 3.12824000  | -1.72653100 | -1.39342500 | 6    | -2.45347000 | -1.56235200 | 0.44623800  | 6  | 2.87636100  | 2.40026900  | 1.79344800  |

|      |             |             |             |   |             |             |             |    |             |             |             |
|------|-------------|-------------|-------------|---|-------------|-------------|-------------|----|-------------|-------------|-------------|
| 1    | 3.13324100  | 1.57625200  | -0.18036800 | 6 | -3.24815800 | 3.11738000  | 0.71604800  | 1  | -1.71259300 | -2.63384900 | -1.94321100 |
| 6    | 1.36118800  | 1.23964200  | 3.26661900  | 1 | -4.09047500 | 2.80577000  | 1.33485300  | 1  | -2.47529200 | -1.04788800 | -1.84589600 |
| 1    | 0.61440800  | -0.65306900 | 2.52829300  | 6 | -3.14017200 | 4.44561700  | 0.26797800  | 6  | -3.86617900 | -2.65022600 | -1.63507100 |
| 6    | 2.22466400  | 2.30049500  | 3.03785600  | 1 | -3.91099000 | 5.16847000  | 0.54288100  | 1  | -3.98588200 | -3.65058700 | -1.20024800 |
| 1    | 3.59977700  | 3.20351900  | 1.62560700  | 6 | -2.06171400 | 4.84192100  | -0.49594300 | 1  | -4.04915700 | -2.73754000 | -2.71421100 |
| 1    | 0.91400400  | 1.10602200  | 4.25673300  | 1 | -1.96336900 | 5.87900600  | -0.82580800 | 1  | -4.64987800 | -1.99729100 | -1.22826300 |
| 1    | 2.43081700  | 3.02675700  | 3.82716500  | 6 | -1.06280800 | 3.91305800  | -0.87335000 | 27 | -0.63401500 | -0.27757600 | -0.25861600 |
| 6    | 3.33441900  | -1.61498800 | -0.91490400 | 6 | 0.06757200  | 4.26264100  | -1.65336700 | 6  | 2.14035500  | 0.43673500  | 1.02312500  |
| 6    | 3.92936600  | -2.19161000 | -2.05431400 | 1 | 0.19814500  | 5.29763400  | -1.97730900 | 6  | 1.25749200  | -0.54135800 | 0.68095600  |
| 6    | 4.13752900  | -1.47583200 | 0.23520300  | 6 | 0.98647400  | 3.28542200  | -1.98055500 | 1  | 1.72172900  | 1.24947200  | 1.63712900  |
| 6    | 5.26505900  | -2.58072800 | -2.06071300 | 1 | 1.87949900  | 3.51732500  | -2.56292200 | 6  | 1.55747700  | -1.75604400 | -0.09071500 |
| 1    | 3.31980500  | -2.32659700 | -2.95310800 | 6 | 0.76800200  | 1.96652300  | -1.56524300 | 6  | 2.05392700  | -2.92801300 | 0.51345300  |
| 6    | 5.47189300  | -1.86763500 | 0.22893300  | 1 | 1.49002900  | 1.18302700  | -1.81749000 | 6  | 1.21248300  | -1.82638100 | -1.45844400 |
| 1    | 3.70338900  | -1.07162700 | 1.15197400  | 6 | -1.19094100 | 2.55304500  | -0.45374100 | 6  | 2.19332300  | -4.10657900 | -0.21369300 |
| 6    | 6.04830100  | -2.41588500 | -0.91866200 | 6 | -3.37618900 | -0.00255300 | 0.53602300  | 1  | 2.32684200  | -2.89747400 | 1.57220400  |
| 1    | 5.69804200  | -3.01934400 | -2.96368500 | 6 | -3.04238900 | -1.43309700 | 0.91870600  | 6  | 1.34075000  | -3.01127100 | -2.18292300 |
| 1    | 6.07007200  | -1.75195600 | 1.13660500  | 1 | -2.60078500 | -1.45265800 | 1.92662900  | 1  | 0.84166900  | -0.92085100 | -1.96263400 |
| 1    | 7.09703800  | -2.72203900 | -0.91816100 | 1 | -3.96474400 | -2.03474200 | 0.90457600  | 6  | 1.83370000  | -4.16018300 | -1.56358700 |
| 8    | -2.48325500 | 0.59467400  | -3.07635000 | 6 | -1.35504600 | -3.15667400 | 0.53661100  | 1  | 2.58822900  | -4.99952600 | 0.27830600  |
|      |             |             |             | 1 | -0.81501300 | -2.81923300 | 1.43709000  | 1  | 1.06434200  | -3.03309100 | -3.24063200 |
|      |             |             |             | 1 | -0.58902200 | -3.45704200 | -0.19337600 | 1  | 1.94417300  | -5.08815200 | -2.12867100 |
|      |             |             |             | 6 | -2.23865900 | -4.34032000 | 0.87171100  | 6  | 3.54282100  | 0.64868800  | 0.68456100  |
| TS12 |             |             |             | 1 | -3.04968800 | -4.07990000 | 1.56683300  | 6  | 4.18183600  | 1.79645800  | 1.19998700  |
| 7    | -2.32559000 | 0.84627900  | 0.83381300  | 1 | -1.63480900 | -5.11466700 | 1.36381800  | 6  | 4.30854600  | -0.19841700 | -0.14591600 |
| 7    | -0.29134800 | 1.58239400  | -0.84239900 | 1 | -2.68728500 | -4.80526200 | -0.01661700 | 6  | 5.51059200  | 2.08564500  | 0.91158600  |
| 7    | -2.00892300 | -1.94608600 | -0.00338900 | 6 | -2.48755100 | -2.06464400 | -1.40482500 | 1  | 3.60641600  | 2.46925500  | 1.84293300  |
| 6    | -2.28057100 | 2.18564500  | 0.38205000  |   |             |             |             |    |             |             |             |

|      |             |             |             |   |             |             |             |    |             |             |             |
|------|-------------|-------------|-------------|---|-------------|-------------|-------------|----|-------------|-------------|-------------|
| 6    | 5.63818600  | 0.09263800  | -0.43285100 | 6 | -3.57842100 | -3.22917900 | -0.88175200 | 1  | -3.28057000 | 4.77728000  | 0.03573400  |
| 1    | 3.85946300  | -1.09513000 | -0.57455000 | 1 | -4.24131800 | -4.05878200 | -0.62316600 | 1  | -2.90996100 | 3.98432200  | -1.49297500 |
| 6    | 6.25025500  | 1.23264900  | 0.09169300  | 6 | -3.39291100 | -2.18984100 | 0.06259700  | 27 | -0.39571800 | 0.70363800  | 0.49593300  |
| 1    | 5.97412000  | 2.98291500  | 1.32943800  | 6 | -4.02203100 | -2.16387500 | 1.33223900  | 8  | 0.18104200  | 1.64234500  | 2.35516700  |
| 1    | 6.20668500  | -0.58195300 | -1.07822300 | 1 | -4.70548800 | -2.96911000 | 1.61122500  | 6  | 0.17827100  | 1.13984200  | 3.64501100  |
| 1    | 7.29495500  | 1.45426000  | -0.13833200 | 6 | -3.76334400 | -1.10921400 | 2.19162300  | 1  | 1.01096200  | 0.42865400  | 3.83300500  |
| 8    | -4.37937300 | 0.32303900  | -0.06606200 | 1 | -4.24644300 | -1.04566700 | 3.16814300  | 1  | 0.28819900  | 1.94312300  | 4.39836000  |
| 1    | -1.67727200 | 0.53042100  | 1.62395400  | 6 | -2.86017300 | -0.11307600 | 1.80962800  | 1  | -0.75608300 | 0.59528100  | 3.90240800  |
| 6    | -0.12218400 | -0.12926100 | 3.75389300  | 1 | -2.62114200 | 0.71931800  | 2.47963900  | 6  | 2.93086300  | 0.65757400  | 0.39892600  |
| 1    | -0.10844300 | 0.95374900  | 4.00173800  | 6 | -2.51088900 | -1.11635200 | -0.26248600 | 6  | 1.66969900  | 0.22485400  | 0.67262800  |
| 1    | -0.68336800 | -0.62891500 | 4.56839600  | 6 | -1.63598700 | 1.28620500  | -1.97610200 | 1  | 1.02528000  | 1.04881400  | 1.61730100  |
| 1    | 0.92813700  | -0.47648800 | 3.84371800  | 6 | -0.64243200 | 2.42372900  | -1.85701100 | 1  | 3.10412500  | 1.74220400  | 0.46508800  |
| 8    | -0.65231300 | -0.40459000 | 2.50636100  | 1 | 0.35332300  | 2.12967500  | -2.22597100 | 6  | 1.18394900  | -1.15566300 | 0.51964700  |
| 1    | 0.24916800  | -0.52449600 | 1.58903400  | 1 | -0.98977000 | 3.27847300  | -2.46398500 | 6  | 0.39862600  | -1.75063500 | 1.53537200  |
|      |             |             |             | 6 | 0.72689400  | 3.46083600  | -0.11330900 | 6  | 1.37026400  | -1.89932500 | -0.67349200 |
|      |             |             |             | 1 | 1.54843000  | 2.86263800  | -0.53717900 | 6  | -0.17605800 | -3.00962500 | 1.36089100  |
|      |             |             |             | 1 | 0.84902600  | 3.40820400  | 0.97941500  | 1  | 0.25557100  | -1.21813000 | 2.47995100  |
| TS13 |             |             |             | 6 | 0.82632800  | 4.89189300  | -0.60074600 | 6  | 0.79015100  | -3.14875500 | -0.84116500 |
| 7    | -1.07253300 | 0.02381100  | -1.83439300 | 1 | 0.62219300  | 4.98919200  | -1.67783000 | 1  | 1.99352500  | -1.47091300 | -1.46651200 |
| 1    | -0.09543700 | -0.13003100 | -2.07111500 | 1 | 1.84376600  | 5.27034700  | -0.43162900 | 6  | 0.00667900  | -3.71364300 | 0.17283500  |
| 7    | -2.21729700 | -0.11260800 | 0.63160000  | 1 | 0.14491700  | 5.56642600  | -0.06496300 | 1  | -0.77972900 | -3.43989000 | 2.16466400  |
| 7    | -0.51207400 | 2.72507600  | -0.42610800 | 6 | -1.72940100 | 3.30498600  | 0.19432600  | 1  | 0.94378400  | -3.69456600 | -1.77637900 |
| 6    | -1.89299900 | -1.09520500 | -1.53942200 | 1 | -1.41103200 | 3.64774000  | 1.19040100  | 1  | -0.45562100 | -4.69314000 | 0.03186400  |
| 6    | -2.10595400 | -2.11835200 | -2.44504300 | 1 | -2.43520100 | 2.47906800  | 0.37603700  | 6  | 4.14469600  | -0.08909200 | 0.06472100  |
| 1    | -1.62280200 | -2.07467800 | -3.42338500 | 6 | -2.45680500 | 4.38768600  | -0.57740700 | 6  | 5.19118600  | 0.57824500  | -0.60166700 |
| 6    | -2.93837600 | -3.19882500 | -2.10446500 | 1 | -1.82302800 | 5.24091100  | -0.85107700 | 6  | 4.35064000  | -1.43985600 | 0.41115000  |
| 1    | -3.09076600 | -4.00734400 | -2.82244800 |   |             |             |             |    |             |             |             |

|      |             |             |             |   |             |             |             |      |             |             |             |
|------|-------------|-------------|-------------|---|-------------|-------------|-------------|------|-------------|-------------|-------------|
| 6    | 6.36933700  | -0.07728500 | -0.94573100 | 6 | -3.24805600 | -2.51607800 | 0.86857700  | 1    | 1.08508100  | 1.16843500  | 1.86141500  |
| 1    | 5.06373900  | 1.63515000  | -0.85533700 | 1 | -3.62418300 | -3.44846700 | 1.29342700  | 6    | -0.18317600 | 0.24266700  | 3.09238800  |
| 6    | 5.53208700  | -2.09189600 | 0.07610900  | 6 | -1.87177500 | -2.27286800 | 0.87266300  | 1    | 0.07509500  | 0.78632200  | 4.01722600  |
| 1    | 3.58233100  | -1.97478100 | 0.97253700  | 1 | -1.18139600 | -3.00289700 | 1.30688400  | 1    | -1.06724300 | 0.73460600  | 2.64447600  |
| 6    | 6.54467000  | -1.42032400 | -0.61282300 | 6 | -2.15334700 | -0.20282400 | -0.17536300 | 1    | -0.48113100 | -0.77686000 | 3.37825400  |
| 1    | 7.15980600  | 0.46519300  | -1.47043900 | 6 | 0.59247100  | 0.66078000  | -1.75391000 | 8    | 0.90392000  | 0.18981200  | 2.20721600  |
| 1    | 5.66999500  | -3.13695100 | 0.36472500  | 6 | 2.08535700  | 0.76970500  | -1.44975400 | 6    | 0.81402400  | 3.59212100  | 1.53394400  |
| 1    | 7.47041100  | -1.93786800 | -0.87462900 | 1 | 2.66219800  | 0.75527500  | -2.38929600 | 1    | 0.93545400  | 4.40559900  | 0.78893200  |
| 8    | -2.83337100 | 1.46173900  | -2.03264800 | 1 | 2.28863800  | 1.69805800  | -0.89727300 | 1    | -0.24393800 | 3.65033300  | 1.87796900  |
|      |             |             |             | 6 | 2.66305600  | -1.59406600 | -1.36076700 | 1    | 1.43344600  | 3.88646800  | 2.40526500  |
|      |             |             |             | 1 | 3.61797600  | -1.52459000 | -1.91608300 |      |             |             |             |
|      |             |             |             | 1 | 1.87385600  | -1.62341000 | -2.12943800 |      |             |             |             |
| TS14 |             |             |             | 6 | 2.61471700  | -2.84176600 | -0.51329900 | TS15 |             |             |             |
| 27   | 0.56298900  | -0.70530500 | 0.35790400  | 1 | 3.41392100  | -2.87642800 | 0.24033500  | 27   | -0.73208100 | 0.81400900  | 0.00070400  |
| 7    | -0.17120000 | 1.11455200  | -0.69483600 | 1 | 2.70712700  | -3.74311600 | -1.13281200 | 7    | 0.01766200  | -1.17282700 | 0.60948500  |
| 7    | -1.31345800 | -1.15453200 | 0.37905300  | 1 | 1.64709100  | -2.90726600 | 0.01993300  | 7    | 1.14848900  | 1.17470300  | -0.20173900 |
| 7    | 2.43227200  | -0.37129200 | -0.56659600 | 6 | 3.51626200  | -0.04122500 | 0.38297300  | 7    | -2.49878100 | -0.25063900 | -0.52383900 |
| 6    | -1.57732300 | 0.97485400  | -0.72647400 | 1 | 3.55524700  | -0.84111400 | 1.13869000  | 6    | 1.40109100  | -1.17337200 | 0.35138700  |
| 6    | -2.39911300 | 1.95325600  | -1.26415800 | 1 | 3.17857900  | 0.85868000  | 0.91915100  | 6    | 2.19722200  | -2.30704500 | 0.44362200  |
| 1    | -1.93917800 | 2.84830200  | -1.68779500 | 6 | 4.87651900  | 0.18354700  | -0.23930700 | 1    | 1.73022600  | -3.25790000 | 0.70047100  |
| 6    | -3.79481500 | 1.79265900  | -1.27420600 | 1 | 5.29148300  | -0.72410800 | -0.70091400 | 6    | 3.57915500  | -2.22358000 | 0.20967200  |
| 1    | -4.42306400 | 2.57634000  | -1.70311600 | 1 | 5.59248000  | 0.50876100  | 0.52666400  | 1    | 4.19119100  | -3.12467000 | 0.29125200  |
| 6    | -4.37174400 | 0.64983400  | -0.75745900 | 1 | 4.84915700  | 0.96917900  | -1.00851600 | 6    | 4.16860200  | -1.01652900 | -0.11163300 |
| 1    | -5.45625300 | 0.51649900  | -0.77226900 | 8 | 0.16168700  | 0.14080700  | -2.77113900 | 1    | 5.24564700  | -0.94984500 | -0.28422800 |
| 6    | -3.57038700 | -0.37421300 | -0.19968700 | 1 | 0.35534700  | 1.81365300  | 0.07207300  | 6    | 3.38841100  | 0.15680900  | -0.24204800 |
| 6    | -4.10836600 | -1.57067000 | 0.34186100  | 8 | 1.17235600  | 2.35767000  | 1.03359800  | 6    | 3.93896800  | 1.41455100  | -0.60404700 |
| 1    | -5.18933400 | -1.72670900 | 0.33452500  |   |             |             |             |      |             |             |             |

|   |             |             |             |      |             |             |             |   |             |             |             |
|---|-------------|-------------|-------------|------|-------------|-------------|-------------|---|-------------|-------------|-------------|
| 1 | 5.01543600  | 1.50437700  | -0.76514800 | 1    | 0.86143200  | 1.36911300  | 2.70962900  | 1 | -1.06186600 | 3.05610800  | -0.09183000 |
| 6 | 3.09368800  | 2.49993700  | -0.75481500 | 1    | -0.27982200 | 0.85619400  | 3.97371200  | 6 | -2.16948600 | -0.04537300 | -0.15080300 |
| 1 | 3.47984000  | 3.48254600  | -1.03220900 | 1    | -0.57105500 | 2.35236100  | 3.07025400  | 6 | 0.50973200  | -2.29614200 | -0.41657100 |
| 6 | 1.72130700  | 2.34116800  | -0.55674400 | 8    | -0.96538000 | 0.60416600  | 2.03316700  | 6 | 1.92739700  | -1.83345100 | -0.68312400 |
| 1 | 1.04082500  | 3.18860800  | -0.68464500 | 1    | -0.38228600 | -0.47332800 | 1.49323500  | 1 | 2.61596100  | -2.63248800 | -0.36107100 |
| 6 | 1.97993500  | 0.07425700  | -0.02409500 |      |             |             |             | 1 | 2.09093000  | -1.66211400 | -1.76087500 |
| 6 | -0.86503800 | -2.03125500 | 0.00292200  |      |             |             |             | 6 | 3.44474000  | 0.04685500  | -0.39227100 |
| 6 | -2.30602900 | -1.54300700 | 0.17649000  | TS16 |             |             |             | 1 | 3.50041800  | 1.02598600  | 0.10259900  |
| 1 | -2.99959900 | -2.31394700 | -0.20355500 | 27   | 0.66563600  | 0.91128300  | -0.85941100 | 1 | 3.35270100  | 0.26595600  | -1.47019800 |
| 1 | -2.50642400 | -1.37564500 | 1.24425800  | 8    | 0.23072900  | -3.20704200 | 0.33501900  | 6 | 4.71014100  | -0.74817900 | -0.13960600 |
| 6 | -2.33982100 | -0.42409900 | -1.98487100 | 7    | -0.42792000 | -1.47981400 | -1.00690700 | 1 | 5.55903800  | -0.23736100 | -0.61343700 |
| 1 | -3.22722500 | -0.94377400 | -2.39765900 | 7    | -1.27557600 | 1.00499300  | -0.20928400 | 1 | 4.67200800  | -1.76099900 | -0.56547300 |
| 1 | -1.49167200 | -1.10576200 | -2.15120100 | 7    | 2.15454900  | -0.55559700 | 0.00607300  | 1 | 4.95143500  | -0.83982300 | 0.92738900  |
| 6 | -2.09959800 | 0.88519400  | -2.70092400 | 6    | -1.74743400 | -1.34570800 | -0.53702900 | 6 | 1.90973800  | -0.61661100 | 1.46466200  |
| 1 | -2.96819500 | 1.55691300  | -2.67244100 | 6    | -2.59427500 | -2.43662200 | -0.41916900 | 1 | 0.81391100  | -0.63423000 | 1.60873600  |
| 1 | -1.85922300 | 0.71199600  | -3.75781500 | 1    | -2.22640300 | -3.42306000 | -0.69974100 | 1 | 2.24451600  | 0.35241800  | 1.86404800  |
| 1 | -1.24347900 | 1.42895400  | -2.25802000 | 6    | -3.90438900 | -2.26202800 | 0.05488800  | 6 | 2.51833800  | -1.77063800 | 2.23719400  |
| 6 | -3.81365700 | 0.35519600  | -0.22166300 | 1    | -4.56220900 | -3.12894200 | 0.14426400  | 1 | 2.25179700  | -1.67675200 | 3.29846100  |
| 1 | -4.60993000 | -0.25397400 | -0.69844900 | 6    | -4.36658100 | -1.00465600 | 0.38345700  | 1 | 3.61346800  | -1.80112200 | 2.17932900  |
| 1 | -3.83326900 | 1.33002100  | -0.73224300 | 1    | -5.39434100 | -0.85965500 | 0.72494000  | 1 | 2.12457000  | -2.73754900 | 1.89668400  |
| 6 | -4.09303100 | 0.54685000  | 1.24931400  | 6    | -3.52318000 | 0.12821600  | 0.28335300  | 1 | 0.77288600  | 3.71753500  | -1.28568500 |
| 1 | -4.37278000 | -0.39114900 | 1.74775700  | 6    | -3.96010300 | 1.43694300  | 0.59819900  | 5 | 1.55407800  | 2.81839400  | -1.05951200 |
| 1 | -4.93275900 | 1.24077200  | 1.38308800  | 1    | -4.98929800 | 1.59741300  | 0.92672700  | 1 | 2.59223300  | 2.69934100  | -1.66393900 |
| 1 | -3.20911400 | 0.94515500  | 1.76807000  | 6    | -3.07198900 | 2.48622200  | 0.45835200  | 1 | 0.66320800  | 1.10634200  | -2.44041400 |
| 8 | -0.58208000 | -3.00288600 | -0.67441400 | 1    | -3.37312800 | 3.51604500  | 0.65734000  | 8 | 1.60653400  | 2.36841400  | 0.31835100  |
| 6 | -0.21845100 | 1.30756800  | 2.96401700  | 6    | -1.75959500 | 2.22921300  | 0.05636900  | 6 | 1.02457900  | 3.08017300  | 1.38095100  |

|      |             |             |             |   |             |             |             |      |             |             |             |
|------|-------------|-------------|-------------|---|-------------|-------------|-------------|------|-------------|-------------|-------------|
| 1    | 0.34047200  | 2.43433400  | 1.95452900  | 6 | 3.01362700  | -1.38013800 | 0.36607100  | 6    | -3.12841000 | 1.43580900  | 0.62676200  |
| 1    | 1.81735700  | 3.42854200  | 2.06155100  | 6 | 1.58014500  | 1.81906100  | -0.52764800 | 6    | -1.89728700 | 0.82909000  | 2.61827300  |
| 1    | 0.47051100  | 3.96568400  | 1.03142000  | 6 | 0.12263200  | 2.15105600  | -0.86773500 | 6    | -3.79213300 | 2.42643000  | 1.34456700  |
| 1    | -0.12402200 | -0.83556000 | -1.75295600 | 1 | -0.27123600 | 1.56478000  | -1.71048400 | 1    | -3.35686100 | 1.27676800  | -0.43280200 |
|      |             |             |             | 1 | -0.52816900 | 1.93425400  | -0.01273400 | 6    | -2.58218600 | 1.80683600  | 3.32980700  |
|      |             |             |             | 6 | -0.02727300 | 3.91751200  | -2.61724500 | 1    | -1.14620900 | 0.21089600  | 3.11652700  |
| TS17 |             |             |             | 1 | -0.05247600 | 5.01354300  | -2.70732900 | 6    | -3.53233800 | 2.62144900  | 2.70378900  |
| 27   | 0.26130600  | -0.86421800 | -0.36582700 | 1 | -1.00925800 | 3.54497200  | -2.94785200 | 1    | -4.53885700 | 3.04610000  | 0.83782000  |
| 8    | 2.34810700  | 2.80420200  | -0.43551600 | 6 | -0.90067000 | 4.37337000  | -0.33848200 | 1    | -2.36685800 | 1.94237700  | 4.39344700  |
| 7    | 1.79897100  | 0.52621800  | -0.34908300 | 1 | -1.90093200 | 3.98488900  | -0.58725500 | 1    | -4.06382400 | 3.39113900  | 3.26768000  |
| 7    | 1.80543100  | -2.01637000 | 0.28646200  | 1 | -0.85327800 | 5.41509000  | -0.68928400 | 6    | -0.61991800 | 4.27667900  | 1.13771400  |
| 7    | 0.08608300  | 3.61467000  | -1.16263400 | 1 | -0.39100800 | -1.90527600 | -1.30988200 | 6    | 1.10456800  | 3.33132500  | -3.42054200 |
| 6    | 3.03429100  | 0.01431500  | 0.03998700  | 6 | -1.42547100 | -0.35232700 | 0.47225000  | 1    | 0.41087100  | 4.57422000  | 1.37629300  |
| 6    | 4.24729700  | 0.69647600  | 0.13552200  | 6 | -1.55854400 | -1.40477000 | -0.31930000 | 1    | -1.29983300 | 4.94358700  | 1.68087500  |
| 1    | 4.28077200  | 1.75791100  | -0.09876500 | 6 | -2.61059500 | -2.34968100 | -0.67045200 | 1    | -0.79321800 | 3.26664600  | 1.53552500  |
| 6    | 5.41731100  | 0.01947200  | 0.52924700  | 6 | -3.87714800 | -2.23633900 | -0.06353000 | 1    | 1.12307900  | 2.23425400  | -3.38009400 |
| 1    | 6.35221400  | 0.58289600  | 0.58848600  | 6 | -2.40994000 | -3.39048500 | -1.59139600 | 1    | 0.99305000  | 3.61680800  | -4.47330000 |
| 6    | 5.41266200  | -1.32536100 | 0.83674100  | 6 | -4.89821700 | -3.12690000 | -0.37428200 | 1    | 2.08000900  | 3.69258500  | -3.07020700 |
| 1    | 6.32870700  | -1.83817400 | 1.13988300  | 1 | -4.04369100 | -1.43709900 | 0.66383200  | 1    | 1.07948300  | 3.84945200  | -0.85445800 |
| 6    | 4.20316500  | -2.05797900 | 0.76390500  | 6 | -3.43404000 | -4.27984000 | -1.90465500 |      |             |             |             |
| 6    | 4.09615700  | -3.43685500 | 1.07047900  | 1 | -1.42526000 | -3.48535700 | -2.06079600 |      |             |             |             |
| 1    | 4.98759700  | -3.98912200 | 1.37808100  | 6 | -4.68374100 | -4.15291900 | -1.29812700 | TS18 |             |             |             |
| 6    | 2.86647200  | -4.05924000 | 0.97386200  | 1 | -5.87292600 | -3.02246000 | 0.10917800  | 27   | 0.67473200  | -0.29721300 | 0.30815800  |
| 1    | 2.75042700  | -5.12005900 | 1.20392700  | 1 | -3.25528600 | -5.08148500 | -2.62591700 | 7    | 2.05774000  | 0.97808500  | -0.59910200 |
| 6    | 1.74745200  | -3.31419100 | 0.57642000  | 1 | -5.48740300 | -4.85239300 | -1.54052500 | 7    | 2.23784100  | -1.45099600 | 0.50946000  |
| 1    | 0.76025100  | -3.78021000 | 0.48782900  | 6 | -2.16176800 | 0.59766200  | 1.24476000  | 7    | -0.25551600 | 2.55300500  | 0.24287000  |

|   |             |             |             |   |             |             |             |      |             |             |             |
|---|-------------|-------------|-------------|---|-------------|-------------|-------------|------|-------------|-------------|-------------|
| 1 | -0.47218900 | 1.33341100  | 0.23069600  | 1 | 0.27124800  | 0.97709100  | 2.49497000  | 1    | -2.51705600 | -0.04589600 | -3.65573500 |
| 6 | 3.30259100  | 0.35600500  | -0.66229400 | 6 | -1.56972600 | 3.24771400  | 0.30711600  | 6    | -4.70925300 | -2.49839100 | -1.61552800 |
| 6 | 4.47994700  | 0.85588900  | -1.23413500 | 1 | -1.37141800 | 4.31339800  | 0.52170900  | 1    | -3.33173300 | -2.17635300 | 0.00214200  |
| 1 | 4.45197800  | 1.82521200  | -1.72231700 | 1 | -2.09092200 | 2.83869400  | 1.18565000  | 6    | -5.05343900 | -2.20034300 | -2.93629100 |
| 6 | 5.67979600  | 0.12423800  | -1.19492200 | 6 | -2.43328300 | 3.10992200  | -0.92195600 | 1    | -4.50614500 | -1.08546300 | -4.70482100 |
| 1 | 6.56867400  | 0.56322700  | -1.65562300 | 1 | -2.04531200 | 3.67843800  | -1.77735700 | 1    | -5.31184400 | -3.20791000 | -1.04275100 |
| 6 | 5.76269400  | -1.11946800 | -0.60547900 | 1 | -3.43406700 | 3.50328800  | -0.70248800 | 1    | -5.92790700 | -2.66545900 | -3.39699700 |
| 1 | 6.69842200  | -1.68271600 | -0.58759900 | 1 | -2.55099800 | 2.06103500  | -1.22790400 | 8    | 2.62932700  | 2.83074500  | -1.89940400 |
| 6 | 4.60567000  | -1.67984100 | -0.01882800 | 1 | -0.92144400 | 0.02436800  | -1.94753800 |      |             |             |             |
| 6 | 4.59222100  | -2.95523900 | 0.59767300  | 6 | -1.25157300 | -0.10504300 | 0.13423500  |      |             |             |             |
| 1 | 5.51562700  | -3.53897500 | 0.63042500  | 6 | -1.61555100 | -0.33913700 | -1.17245400 | TS19 |             |             |             |
| 6 | 3.42254500  | -3.44450600 | 1.13974900  | 6 | -2.16251500 | -0.26736700 | 1.28126900  | 27   | -0.86443400 | -0.27376600 | 1.02529100  |
| 1 | 3.38139600  | -4.42584600 | 1.61490500  | 6 | -3.44759300 | 0.31124700  | 1.30471400  | 7    | -0.93895500 | 1.46471500  | -0.15245000 |
| 6 | 2.26355600  | -2.65937500 | 1.07359000  | 6 | -1.72856800 | -0.91844800 | 2.45111800  | 7    | -2.82181700 | -0.20417900 | 0.67064900  |
| 1 | 1.31776900  | -3.02308000 | 1.48785800  | 6 | -4.25145000 | 0.24033000  | 2.43890900  | 7    | 2.29052900  | 3.02005400  | 0.15614400  |
| 6 | 3.38354200  | -0.94144900 | -0.04665700 | 1 | -3.81770600 | 0.81637200  | 0.40648100  | 6    | -2.15149600 | 1.54545900  | -0.82746500 |
| 6 | 1.86360000  | 2.18460600  | -1.18887900 | 6 | -2.53925900 | -1.01269700 | 3.57914100  | 6    | -2.47932600 | 2.40459000  | -1.87943800 |
| 6 | 0.48354600  | 2.83188900  | -1.00268400 | 1 | -0.72115100 | -1.35484600 | 2.46081400  | 1    | -1.73398500 | 3.11319400  | -2.23290900 |
| 1 | 0.62853400  | 3.91868400  | -1.11063800 | 6 | -3.80539100 | -0.42602400 | 3.58249600  | 6    | -3.75267700 | 2.35887400  | -2.47407500 |
| 1 | -0.15011700 | 2.50945400  | -1.84219700 | 1 | -5.24233600 | 0.70211700  | 2.42901300  | 1    | -3.97103300 | 3.04260400  | -3.29860400 |
| 6 | 0.54694900  | 2.85392300  | 1.45752700  | 1 | -2.17645200 | -1.53766500 | 4.46652600  | 6    | -4.72299000 | 1.47647100  | -2.04436200 |
| 1 | 0.49016600  | 3.94053800  | 1.64172000  | 1 | -4.43895000 | -0.48417600 | 4.47036300  | 1    | -5.70908100 | 1.44727600  | -2.51429900 |
| 1 | 1.59432400  | 2.62494600  | 1.22094600  | 6 | -2.79286100 | -0.99699400 | -1.73515400 | 6    | -4.44257700 | 0.59130500  | -0.97717800 |
| 6 | 0.10999900  | 2.05517300  | 2.66154700  | 6 | -3.14198100 | -0.73244400 | -3.07548100 | 6    | -5.38285300 | -0.34294200 | -0.47084700 |
| 1 | -0.95215200 | 2.18561100  | 2.91365900  | 6 | -3.59778300 | -1.91052700 | -1.02275500 | 1    | -6.37850400 | -0.39568700 | -0.91843900 |
| 1 | 0.69768800  | 2.34841300  | 3.54030700  | 6 | -4.25788600 | -1.31661000 | -3.66589300 | 6    | -5.02552000 | -1.16617900 | 0.57555800  |



|   |             |             |             |   |             |             |             |      |             |             |             |
|---|-------------|-------------|-------------|---|-------------|-------------|-------------|------|-------------|-------------|-------------|
| 1 | -5.72595300 | -1.89335200 | 0.99046600  | 1 | 0.09921400  | -0.07329700 | 4.89194600  | 1    | 3.37429200  | -4.44368900 | -2.32755200 |
| 6 | -3.73418700 | -1.06759500 | 1.11589800  | 6 | 2.41961100  | -1.14715400 | 0.86040900  | 1    | 5.75531900  | -3.72227300 | -2.49096400 |
| 1 | -3.42570500 | -1.71136600 | 1.94636200  | 6 | 1.08452700  | -1.21070700 | 1.09397500  | 8    | 0.10754200  | 3.36838900  | -1.03992600 |
| 6 | -3.15399600 | 0.62871600  | -0.36899400 | 1 | 0.66138500  | -0.37205500 | 2.19008900  |      |             |             |             |
| 6 | 0.01259700  | 2.37243700  | -0.28250400 | 1 | 2.98111400  | -0.40486800 | 1.45553600  |      |             |             |             |
| 6 | 1.17954000  | 2.17439500  | 0.68387800  | 1 | 1.71522300  | 3.61151300  | -0.51924900 | TS22 |             |             |             |
| 1 | 0.90713700  | 2.49901100  | 1.69750600  | 6 | 0.06774600  | -2.03241300 | 0.41625900  | 27   | 0.15889200  | 1.30999500  | -0.46674300 |
| 1 | 1.49081200  | 1.12705200  | 0.76494600  | 6 | -0.63936600 | -3.06566500 | 1.09744200  | 8    | 1.09623400  | -2.43143800 | 1.50875700  |
| 6 | 2.91276200  | 3.88191400  | 1.19595000  | 6 | -0.36454700 | -1.70580600 | -0.90572300 | 7    | 0.08649300  | -0.63975100 | 0.38950800  |
| 1 | 3.37727900  | 3.21325100  | 1.93677100  | 6 | -1.72018600 | -3.70250400 | 0.50489400  | 7    | -1.80787200 | 0.93861700  | -0.61915100 |
| 1 | 2.07705400  | 4.38321200  | 1.70307700  | 1 | -0.31242300 | -3.34997800 | 2.10200100  | 7    | 2.84391200  | -0.37163600 | -0.60441800 |
| 6 | 3.89053300  | 4.89031400  | 0.65056800  | 6 | -1.46625000 | -2.34869000 | -1.47606600 | 6    | -1.19680800 | -1.16970400 | 0.34344300  |
| 1 | 4.81844400  | 4.43587900  | 0.28132000  | 1 | 0.20168100  | -0.97139400 | -1.48497700 | 6    | -1.61477300 | -2.44002700 | 0.75918000  |
| 1 | 4.17355300  | 5.59008500  | 1.44606500  | 6 | -2.15842200 | -3.33500500 | -0.77636000 | 1    | -0.88210600 | -3.11527000 | 1.19193900  |
| 1 | 3.44981200  | 5.48460600  | -0.16233800 | 1 | -2.24582700 | -4.48907000 | 1.05366200  | 6    | -2.95892100 | -2.83934800 | 0.64455800  |
| 6 | 3.27660700  | 2.22316800  | -0.63947500 | 1 | -1.78878700 | -2.06335400 | -2.48129100 | 1    | -3.23171300 | -3.84275200 | 0.98235400  |
| 1 | 3.81064800  | 1.57716400  | 0.07592400  | 1 | -3.02500500 | -3.82530100 | -1.22497800 | 6    | -3.93357400 | -2.00297700 | 0.14264300  |
| 1 | 4.00438200  | 2.93574600  | -1.05126400 | 6 | 3.28784000  | -1.89640100 | -0.04485100 | 1    | -4.97761800 | -2.31764900 | 0.07709200  |
| 6 | 2.63256800  | 1.41739300  | -1.73748100 | 6 | 4.64445700  | -1.52202900 | -0.14031500 | 6    | -3.57245500 | -0.70378000 | -0.28311700 |
| 1 | 1.95593500  | 0.64792500  | -1.34034700 | 6 | 2.85677300  | -2.97031900 | -0.85162100 | 6    | -4.50489800 | 0.24146600  | -0.77468500 |
| 1 | 3.41271500  | 0.89288200  | -2.30280000 | 6 | 5.52266200  | -2.16282000 | -1.00862600 | 1    | -5.55920200 | -0.03906900 | -0.84409200 |
| 1 | 2.06699800  | 2.05267100  | -2.43180800 | 1 | 5.00939900  | -0.70891500 | 0.49724600  | 6    | -4.07978900 | 1.50001600  | -1.14408300 |
| 8 | 0.03295000  | 0.42971000  | 2.87157000  | 6 | 3.73610300  | -3.61318900 | -1.71602300 | 1    | -4.78007100 | 2.25229400  | -1.51062000 |
| 6 | -0.52235600 | -0.19038700 | 3.98187600  | 1 | 1.82149600  | -3.30963600 | -0.79309200 | 6    | -2.71332300 | 1.80712300  | -1.05424500 |
| 1 | -1.52028700 | 0.22264200  | 4.22267200  | 6 | 5.07132700  | -3.21292400 | -1.80834200 | 1    | -2.33781100 | 2.79245400  | -1.34881900 |
| 1 | -0.66145400 | -1.28641500 | 3.83807700  | 1 | 6.56821800  | -1.84711000 | -1.05692400 | 6    | -2.20457700 | -0.29975500 | -0.20339600 |

|   |             |             |             |      |             |             |             |   |             |             |             |
|---|-------------|-------------|-------------|------|-------------|-------------|-------------|---|-------------|-------------|-------------|
| 6 | 1.10340300  | -1.33717300 | 0.94098300  | 1    | -1.05225900 | 1.34558400  | 2.45685300  | 1 | 1.73521100  | -0.56345300 | 2.23345900  |
| 6 | 2.46140400  | -0.63433400 | 0.81297100  | 1    | 2.17849100  | 0.44827800  | -0.87972200 | 1 | 0.10138500  | -0.79600900 | 1.56371500  |
| 1 | 2.43792200  | 0.35031200  | 1.30595300  |      |             |             |             | 6 | 3.05902600  | -1.19819800 | -0.06913100 |
| 1 | 3.23369200  | -1.25854100 | 1.28210900  |      |             |             |             | 1 | 3.22423000  | -0.28288800 | -0.66051200 |
| 6 | 2.54132500  | -1.50313900 | -1.53077200 | TS23 |             |             |             | 1 | 3.29648800  | -2.03072700 | -0.74964800 |
| 1 | 2.86704400  | -1.17140900 | -2.52765700 | 27   | 0.64743000  | -0.01406900 | -1.35690300 | 6 | 3.98272400  | -1.18842700 | 1.13066000  |
| 1 | 1.44551100  | -1.57900300 | -1.56357400 | 7    | 0.01582800  | 1.51806500  | 0.29742600  | 1 | 3.86306000  | -0.26445700 | 1.71174600  |
| 6 | 3.17232700  | -2.81322500 | -1.13324400 | 7    | -1.19648500 | -0.59846000 | -1.02451500 | 1 | 5.02594100  | -1.21324000 | 0.78819000  |
| 1 | 2.80559900  | -3.15753400 | -0.15680200 | 7    | 1.60462100  | -1.30002800 | 0.20003500  | 1 | 3.83890700  | -2.04281200 | 1.80655700  |
| 1 | 4.26994600  | -2.76749700 | -1.10677200 | 6    | -1.29491000 | 1.12000900  | 0.64121200  | 6 | 1.07898600  | -2.66861300 | 0.20358300  |
| 1 | 2.90308700  | -3.58081600 | -1.86917900 | 6    | -2.00346600 | 1.81527600  | 1.61884100  | 1 | 1.26435300  | -3.08695100 | -0.80039800 |
| 6 | 4.24323400  | 0.11572600  | -0.76193200 | 1    | -1.50700200 | 2.63255200  | 2.14687400  | 1 | -0.01607600 | -2.58845000 | 0.29234300  |
| 1 | 4.36588800  | 0.32530600  | -1.83518600 | 6    | -3.33143500 | 1.47632600  | 1.91684100  | 6 | 1.62156300  | -3.60148900 | 1.26625400  |
| 1 | 4.91554600  | -0.72172500 | -0.51880300 | 1    | -3.86665300 | 2.03377800  | 2.68903900  | 1 | 2.68863300  | -3.82065500 | 1.12166000  |
| 6 | 4.56039600  | 1.33808100  | 0.05809800  | 6    | -3.96397400 | 0.44743800  | 1.24275900  | 1 | 1.08853400  | -4.56163400 | 1.23949500  |
| 1 | 3.84438800  | 2.14882700  | -0.12865300 | 1    | -5.00026700 | 0.18554500  | 1.47051400  | 1 | 1.49614500  | -3.18892900 | 2.27861500  |
| 1 | 5.56162900  | 1.69918300  | -0.20715900 | 6    | -3.28242400 | -0.28194300 | 0.24105500  | 1 | 1.65532000  | 0.53136800  | -2.50891700 |
| 1 | 4.56434500  | 1.13358300  | 1.13648200  | 6    | -3.86938500 | -1.35178300 | -0.48438700 | 8 | 2.22870500  | 1.58473300  | 0.84547100  |
| 1 | 1.05747800  | 3.92405500  | -0.20936900 | 1    | -4.90188900 | -1.64184400 | -0.27770000 | 1 | 1.96160300  | 2.77096900  | 0.32528000  |
| 5 | 1.10473100  | 2.94269300  | 0.49509800  | 6    | -3.11388700 | -2.00495800 | -1.44657000 | 8 | 1.31408500  | 3.56319600  | -0.16943300 |
| 1 | 2.10795000  | 2.67986800  | 1.13369400  | 1    | -3.53250000 | -2.83033300 | -2.02581100 | 1 | 0.47229700  | 2.84617400  | -0.05134100 |
| 1 | 1.54153100  | 1.74652800  | -1.12109000 | 6    | -1.80042300 | -1.60504400 | -1.68917500 | 6 | 1.65068400  | 3.64299200  | -1.55639700 |
| 8 | -0.13705900 | 2.62735000  | 1.14284300  | 1    | -1.19493500 | -2.10378100 | -2.45288900 | 1 | 1.65452800  | 2.63486500  | -2.00638500 |
| 6 | -0.16096800 | 1.98669700  | 2.39275500  | 6    | -1.92978700 | 0.06578600  | -0.06272000 | 1 | 0.91665900  | 4.27839300  | -2.06702800 |
| 1 | 0.73066300  | 1.35685500  | 2.55631000  | 6    | 1.12283800  | 0.95197900  | 0.81495900  | 1 | 2.64139300  | 4.10268500  | -1.65619600 |
| 1 | -0.20681400 | 2.73300500  | 3.20194500  | 6    | 1.12453000  | -0.47614400 | 1.31668000  |   |             |             |             |

|      |             |             |             |      |             |             |             |   |             |             |             |
|------|-------------|-------------|-------------|------|-------------|-------------|-------------|---|-------------|-------------|-------------|
|      |             |             |             | 6    | 2.85882000  | -1.37511800 | -0.00701000 | 1 | 4.62636900  | 0.13566900  | -0.39868700 |
| TS24 |             |             |             | 1    | 3.15487300  | -1.02076800 | -1.00786200 | 6 | 5.02983100  | -1.80327600 | 0.47600600  |
| 27   | 0.79145400  | 0.22496600  | -1.59296200 | 1    | 2.44108800  | -2.38425100 | -0.15894500 | 1 | 6.10921200  | -1.63652700 | 0.48128200  |
| 7    | -0.04817700 | 1.81123100  | -0.49775600 | 6    | 4.08540100  | -1.43185300 | 0.88609300  | 6 | 4.51779000  | -3.00525100 | 0.91780300  |
| 1    | 0.46296300  | 2.97280500  | -0.82633900 | 1    | 4.51116400  | -0.43334600 | 1.06162700  | 1 | 5.18085100  | -3.78877500 | 1.29177600  |
| 7    | -0.99327600 | -0.58563800 | -1.22448500 | 1    | 4.87029100  | -2.01776200 | 0.38839000  | 6 | 3.12134000  | -3.24990100 | 0.87397100  |
| 7    | 1.73491200  | -0.51875000 | 0.40922900  | 1    | 3.90999900  | -1.89163200 | 1.86604900  | 6 | 2.51278600  | -4.46164100 | 1.28092300  |
| 6    | -1.17591000 | 1.32425800  | 0.18321200  | 6    | 0.82803100  | -1.10416500 | 1.39932900  | 1 | 3.13067100  | -5.27472800 | 1.66785700  |
| 6    | -1.84493300 | 2.03327500  | 1.17236200  | 1    | 0.30954000  | -1.95194500 | 0.91880100  | 6 | 1.13832800  | -4.59239200 | 1.16750900  |
| 1    | -1.44865700 | 2.99807900  | 1.49621000  | 1    | 0.04371000  | -0.35939800 | 1.60024800  | 1 | 0.63565700  | -5.51314000 | 1.46892200  |
| 6    | -3.02164700 | 1.51522800  | 1.74533700  | 6    | 1.42322800  | -1.54914700 | 2.72237100  | 6 | 0.37813900  | -3.54172800 | 0.64326300  |
| 1    | -3.52793600 | 2.08471400  | 2.52806100  | 1    | 2.04252500  | -2.45034100 | 2.62418400  | 1 | -0.70452500 | -3.63614100 | 0.51282300  |
| 6    | -3.54362800 | 0.30464500  | 1.33096900  | 1    | 0.62003700  | -1.78917200 | 3.43264800  | 6 | 2.26587700  | -2.22083800 | 0.38604100  |
| 1    | -4.45872100 | -0.08998800 | 1.77883900  | 1    | 2.04096200  | -0.76408400 | 3.18399000  | 6 | 1.95927400  | 1.23743300  | -0.29077100 |
| 6    | -2.89942800 | -0.44291700 | 0.31543600  | 1    | 2.13997700  | 0.32531800  | -2.46145200 | 6 | 0.92436700  | 2.16797000  | -0.83832700 |
| 6    | -3.35893500 | -1.69538000 | -0.16646000 | 8    | 1.74461300  | 2.97415800  | -0.55483900 | 1 | 0.37333900  | 1.62285600  | -1.63780500 |
| 1    | -4.27114900 | -2.13191700 | 0.24675400  |      |             |             |             | 1 | 0.18291000  | 2.29242700  | -0.03171300 |
| 6    | -2.63944900 | -2.34202400 | -1.15393700 |      |             |             |             | 6 | 1.88931600  | 3.49880500  | -2.60488000 |
| 1    | -2.96708400 | -3.30472500 | -1.55011900 | TS25 |             |             |             | 1 | 2.24004500  | 4.52445100  | -2.80351900 |
| 6    | -1.46646900 | -1.76034500 | -1.65471800 | 27   | -0.07662200 | -0.85484200 | -0.59504500 | 1 | 1.05551600  | 3.32031800  | -3.32441200 |
| 1    | -0.88117000 | -2.26243900 | -2.43122800 | 8    | 2.89154100  | 1.83303500  | 0.44185800  | 6 | 0.54321000  | 4.55864500  | -0.87085700 |
| 6    | -1.70602700 | 0.08133100  | -0.25776500 | 7    | 1.85527000  | -0.04421400 | -0.48378300 | 1 | -0.48073300 | 4.42554600  | -1.29029200 |
| 6    | 1.31981900  | 1.80308000  | -0.22105000 | 7    | 0.91038300  | -2.37584400 | 0.26181000  | 1 | 0.94412300  | 5.46208500  | -1.35732900 |
| 6    | 2.09375900  | 0.87799000  | 0.66802300  | 7    | 1.42556700  | 3.45878100  | -1.23052100 | 1 | -1.06559400 | -1.62868300 | -1.50661500 |
| 1    | 3.15266300  | 1.06465000  | 0.44341700  | 6    | 2.80170400  | -0.96528400 | -0.01735000 | 6 | -1.47841100 | 0.15469200  | 0.30272800  |
| 1    | 1.95875300  | 1.15781700  | 1.73334900  | 6    | 4.18439200  | -0.77878300 | 0.00572200  | 6 | -1.98968500 | -0.78488200 | -0.46611900 |

|   |             |             |             |      |             |            |             |   |             |             |             |
|---|-------------|-------------|-------------|------|-------------|------------|-------------|---|-------------|-------------|-------------|
| 6 | -3.27909900 | -1.39415500 | -0.75357000 | 1    | 0.02951900  | 3.92388400 | 1.15608000  | 1 | 3.49289500  | -0.35962800 | -1.00594300 |
| 6 | -4.42853200 | -0.92221100 | -0.08842100 | 1    | 2.68116700  | 1.47362500 | -2.80437200 | 6 | 1.92748600  | 2.49441900  | -0.45850900 |
| 6 | -3.42810500 | -2.45531700 | -1.66100600 | 1    | 3.39402400  | 2.65047800 | -3.90450600 | 6 | -1.42911300 | 1.66599700  | 0.09093500  |
| 6 | -5.67393200 | -1.48950900 | -0.33115300 | 1    | 3.84473900  | 2.67041400 | -2.18431500 | 6 | -2.54802300 | 0.87086600  | -0.56602900 |
| 1 | -4.32476800 | -0.10392400 | 0.62915300  | 1    | 3.45342500  | 1.15549100 | 0.85769400  | 1 | -2.39393200 | 0.92005300  | -1.66768700 |
| 6 | -4.67660700 | -3.01976300 | -1.90597600 |      |             |            |             | 1 | -2.41015900 | -0.18323300 | -0.28850600 |
| 1 | -2.53728200 | -2.82809600 | -2.17681900 |      |             |            |             | 6 | -4.36783300 | 2.44615700  | -0.82523700 |
| 6 | -5.80599900 | -2.53980600 | -1.24300600 | TS26 |             |            |             | 1 | -5.37784800 | 2.64736100  | -0.43203300 |
| 1 | -6.55283800 | -1.10993500 | 0.19592700  | 27   | 0.42919700  | 0.14861700 | -0.19606600 | 1 | -4.50376700 | 2.26354100  | -1.91849000 |
| 1 | -4.76968800 | -3.84262100 | -2.61922100 | 8    | -1.52142500 | 1.97532300 | 1.34047600  | 6 | -4.82979800 | 0.15016100  | -0.32809500 |
| 1 | -6.78620500 | -2.98319700 | -1.43331300 | 7    | -0.40144200 | 1.99636700 | -0.68426100 | 1 | -4.82914700 | -0.21628200 | -1.38259300 |
| 6 | -1.81062400 | 1.24826200  | 1.16931600  | 7    | 2.13291600  | 1.16108200 | -0.68226700 | 1 | -5.83411900 | 0.57634700  | -0.17347200 |
| 6 | -2.71324200 | 2.26032500  | 0.76309000  | 7    | -3.88214300 | 1.24778500 | -0.15746000 | 1 | 1.26083100  | -0.80250900 | 1.84992500  |
| 6 | -1.18309800 | 1.40193500  | 2.42696700  | 6    | 0.56897300  | 2.91865600 | -0.32633500 | 6 | -0.29405700 | -1.48610800 | 0.54299900  |
| 6 | -2.98474800 | 3.35034100  | 1.58351000  | 6    | 0.32643100  | 4.23856700 | 0.04118300  | 6 | 1.03723800  | -1.45673900 | 0.98463700  |
| 1 | -3.19693900 | 2.17323800  | -0.21431300 | 1    | -0.70322900 | 4.57158100 | 0.18172700  | 6 | 2.18312000  | -2.30382700 | 0.61691400  |
| 6 | -1.48074200 | 2.48107000  | 3.25201200  | 6    | 1.39262400  | 5.14207000 | 0.20526400  | 6 | 2.19835300  | -3.11998500 | -0.53061600 |
| 1 | -0.46335600 | 0.64304300  | 2.74793700  | 1    | 1.16656600  | 6.17387300 | 0.48475600  | 6 | 3.34998600  | -2.25559800 | 1.40126400  |
| 6 | -2.38131500 | 3.46578200  | 2.83812300  | 6    | 2.70677300  | 4.76187100 | 0.01143200  | 6 | 3.33112300  | -3.85344500 | -0.86885600 |
| 1 | -3.68504900 | 4.11781000  | 1.24237100  | 1    | 3.52353700  | 5.47675400 | 0.13122700  | 1 | 1.31564500  | -3.16381500 | -1.17261900 |
| 1 | -0.99506900 | 2.56245700  | 4.22810900  | 6    | 3.00385800  | 3.41866400 | -0.32114700 | 6 | 4.48323800  | -2.99001900 | 1.06274300  |
| 1 | -2.60344100 | 4.31907300  | 3.48265200  | 6    | 4.31110500  | 2.90629500 | -0.50688700 | 1 | 3.36037900  | -1.61945100 | 2.29198400  |
| 6 | 0.46778000  | 4.78091300  | 0.62251400  | 1    | 5.16667500  | 3.58186600 | -0.42585600 | 6 | 4.47988900  | -3.79481900 | -0.07620700 |
| 6 | 3.00966300  | 2.52119800  | -2.88407400 | 6    | 4.49252300  | 1.56586600 | -0.77668300 | 1 | 3.31953200  | -4.47683900 | -1.76635900 |
| 1 | 1.46913600  | 4.95550200  | 1.04063300  | 1    | 5.48971100  | 1.14814600 | -0.92309400 | 1 | 5.37529100  | -2.93334200 | 1.69166100  |
| 1 | -0.16524900 | 5.64697900  | 0.85887700  | 6    | 3.37376100  | 0.71589700 | -0.83888800 | 1 | 5.36686500  | -4.37192800 | -0.34743700 |

|   |             |             |             |      |             |             |             |  |   |             |             |             |
|---|-------------|-------------|-------------|------|-------------|-------------|-------------|--|---|-------------|-------------|-------------|
| 6 | -0.95062600 | -2.56705700 | -0.18824900 |      |             |             |             |  | 1 | 2.65678000  | 0.26519300  | 0.49362100  |
| 6 | -1.51936800 | -2.36475200 | -1.46260900 |      |             |             |             |  | 6 | 3.96010600  | 3.29849300  | 0.16831100  |
| 6 | -1.13007800 | -3.83164900 | 0.40973300  | TS27 |             |             |             |  | 1 | 4.81103800  | 3.62391700  | -0.45235300 |
| 6 | -2.23242500 | -3.37164400 | -2.10697000 | 27   | -0.05469000 | 0.04190400  | 0.74540700  |  | 1 | 4.31498900  | 3.37184400  | 1.22445800  |
| 1 | -1.38082100 | -1.39678100 | -1.95807600 | 8    | 1.09610000  | 1.56695500  | -1.44200300 |  | 6 | 4.85036000  | 1.07967700  | -0.19479500 |
| 6 | -1.85251900 | -4.83310900 | -0.23079600 | 7    | 0.21232400  | 2.08239300  | 0.65200600  |  | 1 | 5.20537000  | 0.86671900  | 0.84084600  |
| 1 | -0.69508500 | -4.01367400 | 1.39699700  | 7    | -2.00852800 | 0.60516500  | 1.00490100  |  | 1 | 5.65642800  | 1.66992100  | -0.65976600 |
| 6 | -2.41127000 | -4.61118000 | -1.49151400 | 7    | 3.66593400  | 1.92565200  | -0.19815500 |  | 1 | -0.95922300 | -0.23375800 | -1.59011900 |
| 1 | -2.65351000 | -3.18617800 | -3.09852400 | 6    | -0.98993700 | 2.58722200  | 0.16522400  |  | 6 | 0.79959100  | -1.10465100 | -0.78392700 |
| 1 | -1.98122900 | -5.80192500 | 0.25900700  | 6    | -1.11631100 | 3.80089400  | -0.49659300 |  | 6 | -0.55693800 | -1.11542400 | -1.05722900 |
| 1 | -2.97907700 | -5.39940200 | -1.99070300 | 1    | -0.21494500 | 4.35709100  | -0.76048300 |  | 6 | -1.60265000 | -2.14018200 | -0.86484900 |
| 6 | -4.63741800 | -1.01097600 | 0.62003800  | 6    | -2.38909800 | 4.31967500  | -0.80384800 |  | 6 | -1.42046500 | -3.34036700 | -0.14947300 |
| 6 | -3.50247700 | 3.66953300  | -0.63012600 | 1    | -2.45418200 | 5.27966100  | -1.32096200 |  | 6 | -2.89179200 | -1.86811500 | -1.36088100 |
| 1 | -4.66165300 | -0.67563700 | 1.66503400  | 6    | -3.54600300 | 3.65036800  | -0.45811200 |  | 6 | -2.48281100 | -4.21718900 | 0.05359200  |
| 1 | -5.43542900 | -1.75117200 | 0.47077100  | 1    | -4.52829600 | 4.06593100  | -0.69243900 |  | 1 | -0.43915600 | -3.58833800 | 0.25863600  |
| 1 | -3.68456100 | -1.54002700 | 0.47399300  | 6    | -3.46179600 | 2.39266500  | 0.18608700  |  | 6 | -3.95203300 | -2.74838300 | -1.16434600 |
| 1 | -2.54179500 | 3.58896100  | -1.15991300 | 6    | -4.58087300 | 1.60117100  | 0.54498100  |  | 1 | -3.05479400 | -0.93107200 | -1.90477400 |
| 1 | -4.00630100 | 4.55957900  | -1.03028000 | 1    | -5.58767900 | 1.98110600  | 0.35283500  |  | 6 | -3.75293700 | -3.93036000 | -0.45147100 |
| 1 | -3.29425000 | 3.84226400  | 0.43495300  | 6    | -4.39087400 | 0.36118400  | 1.11369400  |  | 1 | -2.31549900 | -5.14104000 | 0.61309400  |
| 1 | -1.88023100 | 1.03695000  | 1.86322000  | 1    | -5.23430300 | -0.27430400 | 1.38750500  |  | 1 | -4.94018800 | -2.50854900 | -1.56608700 |
| 6 | -1.58515100 | -0.54896400 | 3.52908000  | 6    | -3.07953500 | -0.11274200 | 1.30901800  |  | 1 | -4.58024500 | -4.62576100 | -0.29129600 |
| 1 | -0.77195900 | 0.08973400  | 3.92250200  | 1    | -2.90508000 | -1.11884600 | 1.70365000  |  | 6 | 1.54497000  | -2.21931800 | -0.23180200 |
| 1 | -2.45098000 | -0.43935300 | 4.20077500  | 6    | -2.17456900 | 1.85510300  | 0.47356500  |  | 6 | 1.96051000  | -2.21964200 | 1.12108800  |
| 1 | -1.24584700 | -1.59652500 | 3.59404600  | 6    | 1.19833400  | 1.66801900  | -0.12483300 |  | 6 | 1.99045400  | -3.29746800 | -1.03245800 |
| 8 | -1.94063000 | -0.23056300 | 2.21439400  | 6    | 2.54194200  | 1.36120900  | 0.51229800  |  | 6 | 2.73678600  | -3.24481000 | 1.65483900  |
| 1 | -1.21814100 | -0.74757900 | 1.45693000  | 1    | 2.49700300  | 1.65904400  | 1.58319800  |  | 1 | 1.64745300  | -1.38792800 | 1.77502700  |

|      |             |             |             |   |             |             |             |      |             |             |             |
|------|-------------|-------------|-------------|---|-------------|-------------|-------------|------|-------------|-------------|-------------|
| 6    | 2.78364100  | -4.30752400 | -0.50259900 | 1 | 4.17818200  | -2.20047500 | 2.77585700  | 1    | -1.13822900 | 4.40243500  | 1.03049200  |
| 1    | 1.69575100  | -3.32543400 | -2.08520100 | 6 | 4.34277300  | -1.06206000 | 0.96307500  | 1    | 0.58713300  | 4.72840000  | 0.82666500  |
| 6    | 3.16319500  | -4.29695500 | 0.84410700  | 1 | 5.43295800  | -0.99794200 | 0.99671300  | 1    | 0.04552900  | 3.66270800  | 2.13081400  |
| 1    | 3.02075000  | -3.21444200 | 2.71027000  | 6 | 3.65207700  | -0.44615100 | -0.10567900 | 8    | -1.95733500 | -0.91905000 | 1.57465500  |
| 1    | 3.11054500  | -5.12576500 | -1.15049700 | 6 | 4.29345700  | 0.28173400  | -1.14390600 | 1    | -2.39635900 | -1.80671300 | 0.88070900  |
| 1    | 3.78889100  | -5.09340300 | 1.25196600  | 1 | 5.38240700  | 0.36868100  | -1.14773400 | 8    | -2.07509200 | -0.93264900 | -1.64324200 |
| 6    | 4.67665000  | -0.21335400 | -0.95945800 | 6 | 3.52231200  | 0.86920100  | -2.13042700 | 6    | -2.83997700 | -0.51029200 | -2.72121700 |
| 6    | 2.79847300  | 4.24498700  | -0.03663400 | 1 | 3.98312900  | 1.43553300  | -2.94230100 | 1    | -2.21555900 | -0.16080700 | -3.56450800 |
| 1    | 4.31152100  | -0.01789500 | -1.97783400 | 6 | 2.13027900  | 0.74184700  | -2.09472900 | 1    | -3.46823200 | -1.32794500 | -3.12129900 |
| 1    | 5.63331100  | -0.74765200 | -1.03414700 | 1 | 1.50820200  | 1.20434500  | -2.86771000 | 1    | -3.52727700 | 0.32347100  | -2.46494500 |
| 1    | 3.96820600  | -0.90695600 | -0.48355600 | 6 | 2.22867300  | -0.53907800 | -0.14510200 | 6    | -4.34333000 | -2.24740900 | 0.15294200  |
| 1    | 1.98856300  | 4.07419100  | 0.68725300  | 6 | -0.72982900 | -0.60519100 | 1.34249100  | 1    | -4.88759400 | -2.72471600 | -0.67663200 |
| 1    | 3.12253800  | 5.28692600  | 0.08848900  | 6 | -0.38735000 | 0.84547800  | 1.63911400  | 1    | -4.62196900 | -1.17660300 | 0.17401700  |
| 1    | 2.38213700  | 4.13522100  | -1.04902400 | 1 | -0.86227900 | 1.20069300  | 2.57021300  | 1    | -4.69791100 | -2.70251200 | 1.08926700  |
| 1    | 1.32371700  | 0.57976900  | -1.59453200 | 1 | 0.69953300  | 0.97636300  | 1.74373100  | 8    | -2.96033800 | -2.44104700 | 0.01404500  |
|      |             |             |             | 6 | -2.28023200 | 1.81733000  | 0.33875500  | 1    | -2.58119800 | -1.80770100 | -0.85655400 |
|      |             |             |             | 1 | -2.73756300 | 0.89470000  | -0.05336100 |      |             |             |             |
|      |             |             |             | 1 | -2.41294400 | 2.57713700  | -0.44894700 |      |             |             |             |
| TS29 |             |             |             | 6 | -3.00555400 | 2.21716800  | 1.60632500  | TS30 |             |             |             |
| 27   | -0.43695000 | -0.14384000 | -0.95059600 | 1 | -3.03790900 | 1.38152500  | 2.31835900  | 7    | 0.77279000  | -0.72038400 | -0.96567200 |
| 7    | 0.13622000  | -1.41374100 | 0.75734800  | 1 | -4.04656800 | 2.47632500  | 1.36970000  | 7    | 0.66436000  | 0.88685300  | 1.30360500  |
| 7    | 1.47796800  | 0.06272900  | -1.13461300 | 1 | -2.55664600 | 3.08390800  | 2.11071300  | 7    | 3.49134200  | -2.76544500 | 0.02525500  |
| 6    | 1.51468300  | -1.24497800 | 0.86481600  | 6 | 0.00170700  | 2.76543000  | 0.14498800  | 6    | 1.52020500  | 0.46691200  | -0.88812200 |
| 6    | 2.24034600  | -1.82543000 | 1.90537800  | 1 | -0.22971700 | 3.07327600  | -0.88919700 | 6    | 2.28717600  | 0.89338900  | -1.96426400 |
| 1    | 1.69559800  | -2.37489600 | 2.67605200  | 1 | 1.04925500  | 2.42398700  | 0.12122400  | 1    | 2.32674200  | 0.26623200  | -2.85837500 |
| 6    | 3.63951600  | -1.73003300 | 1.94944200  | 6 | -0.13987400 | 3.94590100  | 1.08385200  | 6    | 2.99782500  | 2.10798400  | -1.91996000 |

|   |             |             |             |    |             |             |             |      |             |             |             |
|---|-------------|-------------|-------------|----|-------------|-------------|-------------|------|-------------|-------------|-------------|
| 1 | 3.58778700  | 2.41123300  | -2.78786700 | 1  | 5.41549000  | -1.93440800 | 1.98965400  | 6    | -1.04986700 | 4.81792200  | -0.84512100 |
| 6 | 2.96359100  | 2.90657600  | -0.79696300 | 1  | 5.19303900  | -3.39058600 | 2.97444300  | 1    | -3.04499000 | -2.82634400 | 1.22731600  |
| 1 | 3.52066300  | 3.84529300  | -0.75676500 | 1  | 3.86465600  | -2.24215000 | 2.78695400  | 1    | -4.99372400 | 0.64643100  | -0.38242400 |
| 6 | 2.19612500  | 2.51443900  | 0.32559900  | 8  | 0.84859800  | -2.97956400 | -1.11636300 | 1    | -5.20495700 | -4.09528500 | 1.10558100  |
| 6 | 2.11430200  | 3.27314000  | 1.51801800  | 1  | 0.03373200  | -2.60167700 | -2.04578500 | 1    | -7.14345900 | -0.60126900 | -0.51023300 |
| 1 | 2.66859600  | 4.21184900  | 1.59360000  | 8  | -0.61557000 | -1.85438900 | -2.63669600 | 1    | -7.25242300 | -2.97636700 | 0.23370000  |
| 6 | 1.33366300  | 2.82228900  | 2.55965600  | 1  | -0.10843700 | -1.06014200 | -1.98321400 | 1    | -2.37230300 | 3.05599300  | 1.76128300  |
| 1 | 1.24809000  | 3.38420000  | 3.49069200  | 6  | -1.96925500 | -2.05343100 | -2.25095800 | 1    | -1.08885700 | 1.64949100  | -2.10929500 |
| 6 | 0.60728200  | 1.63050600  | 2.40118000  | 1  | -2.03800700 | -2.34620100 | -1.19090800 | 1    | -1.73304200 | 5.36778300  | 1.12881200  |
| 1 | -0.06272200 | 1.27684100  | 3.19174000  | 1  | -2.54307200 | -1.12777500 | -2.39555800 | 1    | -0.45817900 | 3.96064700  | -2.74030700 |
| 6 | 1.45373900  | 1.29583300  | 0.26913300  | 1  | -2.41147400 | -2.84096200 | -2.87518200 | 1    | -0.76433000 | 5.83553800  | -1.12054400 |
| 6 | 1.27731000  | -1.91674200 | -0.59159000 | 27 | -0.77608100 | -0.52623400 | 0.90768800  |      |             |             |             |
| 6 | 2.34153900  | -2.03652000 | 0.47768300  | 1  | -0.84571300 | -2.07898700 | 1.27246200  |      |             |             |             |
| 1 | 2.56285500  | -1.03052200 | 0.89586100  | 6  | -2.63855500 | -0.28221900 | 0.49496100  | TS31 |             |             |             |
| 1 | 1.85518700  | -2.59960900 | 1.29187800  | 6  | -2.04193200 | 0.83584500  | 0.26029600  | 7    | -0.67814300 | 1.30732000  | 0.88391900  |
| 6 | 4.26008800  | -2.11464500 | -1.01307600 | 6  | -3.88396400 | -1.01757000 | 0.43425700  | 1    | -0.44117200 | 0.32370900  | 1.74117500  |
| 1 | 3.55409300  | -1.83842900 | -1.81918300 | 6  | -3.95886500 | -2.35642100 | 0.85093800  | 7    | 1.26766200  | 1.76007900  | -0.94856700 |
| 1 | 4.92511200  | -2.86865900 | -1.46718000 | 6  | -5.04790800 | -0.39590800 | -0.05679900 | 7    | -4.29768000 | 0.39340300  | 1.04449800  |
| 6 | 5.07156600  | -0.88657800 | -0.62038800 | 6  | -5.16127100 | -3.05367500 | 0.77796500  | 6    | -0.41506600 | 2.62406900  | 0.52002500  |
| 1 | 4.46259000  | -0.14655400 | -0.07758200 | 6  | -6.24775500 | -1.09633300 | -0.12681600 | 6    | -1.08792100 | 3.71923500  | 1.04998300  |
| 1 | 5.47164400  | -0.37890500 | -1.51028900 | 6  | -6.30918100 | -2.42772100 | 0.28999000  | 1    | -1.89577900 | 3.55131400  | 1.76617200  |
| 1 | 5.92866900  | -1.14447100 | 0.01780400  | 6  | -1.78606200 | 2.18720900  | -0.13130600 | 6    | -0.71494800 | 5.03115100  | 0.70493800  |
| 6 | 4.20778000  | -3.50511600 | 1.04283200  | 6  | -1.95411700 | 3.25837900  | 0.77181900  | 1    | -1.26411300 | 5.87050300  | 1.13693800  |
| 1 | 5.05667500  | -4.00393300 | 0.54711100  | 6  | -1.23793100 | 2.47074500  | -1.40205000 | 6    | 0.34827200  | 5.26672300  | -0.14186200 |
| 1 | 3.55259700  | -4.32285900 | 1.39461200  | 6  | -1.59133300 | 4.55335800  | 0.41346500  | 1    | 0.65269100  | 6.28603400  | -0.38934300 |
| 6 | 4.69837200  | -2.72354800 | 2.25417400  | 6  | -0.88123600 | 3.76812300  | -1.75092600 | 6    | 1.06310000  | 4.18129200  | -0.70287600 |

|   |             |             |             |    |             |             |             |                    |             |             |             |
|---|-------------|-------------|-------------|----|-------------|-------------|-------------|--------------------|-------------|-------------|-------------|
| 6 | 2.16589400  | 4.33915800  | -1.57794900 | 27 | 0.41717600  | -0.09175400 | -0.79619900 |                    |             |             |             |
| 1 | 2.50852100  | 5.34555700  | -1.83068000 | 1  | -1.01472400 | -0.34580700 | -1.48312200 |                    |             |             |             |
| 6 | 2.79091100  | 3.22472500  | -2.09290800 | 6  | 0.80822400  | -1.92102700 | -0.44230500 |                    |             |             |             |
| 1 | 3.64843500  | 3.31275300  | -2.76130000 | 6  | 1.80467400  | -1.19387000 | -0.03456500 | Cat.A <sup>S</sup> |             |             |             |
| 6 | 2.30448800  | 1.94969800  | -1.75851000 | 6  | 0.20736400  | -3.23072300 | -0.54212400 | 6                  | -1.73471700 | 1.00936400  | -0.63170800 |
| 1 | 2.77226600  | 1.04670600  | -2.16228400 | 6  | -0.87752200 | -3.47498100 | -1.40050200 | 6                  | -1.27435900 | 1.59743000  | 0.68863700  |
| 6 | 0.65868500  | 2.84840800  | -0.39077600 | 6  | 0.71500300  | -4.29999100 | 0.22248700  | 8                  | -2.01684800 | 2.17371300  | 1.45635500  |
| 6 | -1.84595600 | 0.68670800  | 1.10237600  | 6  | -1.43142500 | -4.74748600 | -1.49841000 | 7                  | 0.02436800  | 1.21127500  | 1.06975800  |
| 6 | -3.13792700 | 0.96712600  | 0.42389300  | 6  | 0.15017400  | -5.56760400 | 0.13085500  | 6                  | 1.20864300  | 1.27118300  | 0.25289900  |
| 1 | -3.26136600 | 2.06121400  | 0.36187000  | 6  | -0.92324400 | -5.79757400 | -0.73219100 | 6                  | 1.62575300  | 2.42415400  | -0.39969400 |
| 1 | -2.93751700 | 0.65110300  | -0.63084100 | 6  | 3.13148200  | -1.09091700 | 0.51695600  | 6                  | 3.24109500  | 0.08306800  | -0.43203500 |
| 6 | -5.53881600 | 1.02916800  | 0.64321800  | 6  | 4.06941000  | -2.13273600 | 0.35927100  | 6                  | 2.85013600  | 2.40598800  | -1.09050300 |
| 1 | -5.42274600 | 2.11607000  | 0.79962700  | 6  | 3.53740800  | 0.06701600  | 1.20924900  | 1                  | 1.01565300  | 3.32921800  | -0.35406400 |
| 1 | -6.32093000 | 0.71754300  | 1.35576000  | 6  | 5.35557500  | -2.01643900 | 0.87569000  | 6                  | 3.64597600  | 1.27446500  | -1.08954800 |
| 6 | -6.01528700 | 0.76924000  | -0.77801300 | 6  | 4.81926500  | 0.17143200  | 1.73950700  | 1                  | 3.18386200  | 3.30499700  | -1.61334700 |
| 1 | -5.25861400 | 1.05450300  | -1.52453400 | 6  | 5.73633300  | -0.86730300 | 1.57182600  | 1                  | 4.60363500  | 1.27738900  | -1.61628600 |
| 1 | -6.92651100 | 1.34211400  | -1.00141300 | 6  | -1.27093100 | -2.63530000 | -1.98042900 | 27                 | -0.41037700 | -0.85349000 | 0.77093500  |
| 1 | -6.25235200 | -0.29242300 | -0.93892900 | 1  | 1.55342800  | -4.11603100 | 0.89957600  | 1                  | 0.19250900  | 1.47659200  | 2.04300100  |
| 6 | -4.33755900 | -1.07049300 | 1.12061600  | 1  | -2.27258200 | -4.92206100 | -2.17437000 | 6                  | 1.97924500  | 0.09011200  | 0.23066900  |
| 1 | -5.39052200 | -1.34455200 | 1.29365000  | 1  | 0.54963500  | -6.38461600 | 0.73687600  | 6                  | 3.98357500  | -1.12395100 | -0.41585100 |
| 1 | -3.79313600 | -1.39809700 | 2.02054100  | 1  | -1.36385100 | -6.79484100 | -0.80519800 | 6                  | 3.43165600  | -2.23277600 | 0.21356200  |
| 6 | -3.78739200 | -1.82220200 | -0.07718400 | 1  | 3.77133400  | -3.03364300 | -0.18338500 | 6                  | 2.16628400  | -2.17389500 | 0.79322200  |
| 1 | -4.29277600 | -1.55837800 | -1.01860800 | 1  | 2.81690900  | 0.88168600  | 1.33055400  | 1                  | 4.96122400  | -1.16905000 | -0.89903000 |
| 1 | -3.89689600 | -2.90567800 | 0.06933700  | 1  | 6.06877400  | -2.83336000 | 0.73931800  | 1                  | 3.97818500  | -3.17760000 | 0.25149900  |
| 1 | -2.71165800 | -1.63338400 | -0.21786000 | 1  | 5.10904400  | 1.07335600  | 2.28442900  | 1                  | 1.70280800  | -3.04731400 | 1.25236900  |
| 8 | -1.60425800 | -0.28163500 | 1.88737200  | 1  | 6.74539000  | -0.78198800 | 1.98164000  | 7                  | 1.41558400  | -1.04442900 | 0.79788600  |
|   |             |             |             |    |             |             |             | 7                  | -2.03720900 | -0.40646800 | -0.35248700 |



|                    |             |             |             |   |             |             |             |                    |             |             |             |
|--------------------|-------------|-------------|-------------|---|-------------|-------------|-------------|--------------------|-------------|-------------|-------------|
| 1                  | -2.59767200 | 1.58353100  | -1.01029900 | 6 | -1.61300300 | 2.31975200  | -0.40954500 | 1                  | 2.76506400  | -0.67239600 | 2.27314400  |
| 1                  | -0.93637900 | 1.04352700  | -1.38854200 | 1 | -0.92943200 | 3.10715300  | -0.71286800 | 1                  | 1.28693600  | 0.08157100  | 1.66711400  |
| 6                  | -2.02703500 | -1.25042500 | -1.56459200 | 6 | -2.93687800 | 2.62484100  | -0.04023500 | 6                  | 2.93774000  | 1.46267300  | 1.89062300  |
| 1                  | -2.03867500 | -2.29093200 | -1.21114000 | 1 | -3.25395400 | 3.67065400  | -0.07051900 | 1                  | 4.03073900  | 1.51768300  | 1.80182300  |
| 1                  | -1.03418600 | -1.11177700 | -2.02141200 | 6 | -3.84016900 | 1.65446100  | 0.34953800  | 1                  | 2.68175100  | 1.72395200  | 2.92527100  |
| 6                  | -3.21597800 | -0.61414400 | 0.53289100  | 1 | -4.86430200 | 1.91563300  | 0.62644600  | 1                  | 2.50055200  | 2.23529900  | 1.24403000  |
| 1                  | -3.44034600 | -1.68895000 | 0.47486100  | 6 | -3.43876600 | 0.29790600  | 0.38085800  | 1                  | 1.42529700  | -1.74215700 | -1.54383300 |
| 1                  | -2.88206100 | -0.44496300 | 1.57115900  | 6 | -4.28074500 | -0.78472800 | 0.74641500  | 8                  | 1.16435800  | 2.53569200  | -0.84764200 |
| 6                  | -3.12063100 | -0.99648700 | -2.57962700 | 1 | -5.31498400 | -0.59026600 | 1.03905000  |                    |             |             |             |
| 1                  | -3.17202200 | 0.05807400  | -2.88928000 | 6 | -3.77539000 | -2.07225200 | 0.71504600  |                    |             |             |             |
| 1                  | -2.93004600 | -1.58763800 | -3.48523300 | 1 | -4.39828100 | -2.92725300 | 0.98509200  | Cat.C <sup>S</sup> |             |             |             |
| 1                  | -4.11282100 | -1.29020400 | -2.21076600 | 6 | -2.44651700 | -2.29349500 | 0.33703500  | 27                 | 0.61417900  | -0.19373300 | -1.37910600 |
| 6                  | -4.43848300 | 0.23904600  | 0.26663400  | 1 | -2.02898800 | -3.30512500 | 0.31472300  | 7                  | -0.31243900 | -1.76541600 | -0.62421700 |
| 1                  | -4.80370200 | 0.16845600  | -0.76629600 | 6 | -2.10324600 | -0.00911900 | 0.00765900  | 7                  | -0.99554200 | 0.79203800  | -0.78244600 |
| 1                  | -5.25545200 | -0.08434300 | 0.92518800  | 6 | 1.16103700  | 1.30533700  | -0.80918700 | 7                  | 2.02437800  | 0.57299900  | 0.11996400  |
| 1                  | -4.24527500 | 1.29559100  | 0.49497800  | 6 | 2.50994600  | 0.59253100  | -0.87178100 | 6                  | -1.46947000 | -1.36497800 | 0.03782100  |
| 1                  | -0.72043200 | -2.33152600 | 0.73073100  | 1 | 2.60564800  | 0.03774500  | -1.81710000 | 6                  | -2.26644000 | -2.20307800 | 0.81569100  |
|                    |             |             |             | 1 | 3.30088000  | 1.34873500  | -0.80306000 | 1                  | -1.95190900 | -3.23727100 | 0.97070900  |
|                    |             |             |             | 6 | 3.88078800  | -1.25355300 | 0.05845600  | 6                  | -3.48059700 | -1.73601300 | 1.34908500  |
| Cat.B <sup>S</sup> |             |             |             | 1 | 3.79915500  | -1.69823400 | -0.94614500 | 1                  | -4.09815000 | -2.42168600 | 1.93476700  |
| 27                 | 0.07533100  | -1.42164900 | -0.78905100 | 1 | 3.76912200  | -2.08469400 | 0.77130600  | 6                  | -3.92943700 | -0.44466700 | 1.11915500  |
| 7                  | 0.09471600  | 0.47766400  | -0.67965800 | 6 | 5.19359700  | -0.54158300 | 0.25541700  | 1                  | -4.89370200 | -0.10983400 | 1.50823600  |
| 1                  | 1.83697100  | -1.10946200 | -0.05348400 | 1 | 5.30837000  | 0.32205900  | -0.41335700 | 6                  | -3.13633500 | 0.45233200  | 0.36844500  |
| 7                  | -1.61380700 | -1.29529400 | -0.00263100 | 1 | 6.01965600  | -1.22977100 | 0.03551800  | 6                  | -3.48385200 | 1.79510400  | 0.06159800  |
| 7                  | 2.66538800  | -0.41690800 | 0.20500900  | 1 | 5.33113500  | -0.19582300 | 1.28865400  | 1                  | -4.44906600 | 2.19173400  | 0.38593900  |
| 6                  | -1.17494400 | 0.99316700  | -0.38779400 | 6 | 2.38584700  | 0.09330300  | 1.57993800  | 6                  | -2.59264900 | 2.58325800  | -0.64031000 |

|   |             |             |             |                  |             |             |             |  |   |             |             |             |
|---|-------------|-------------|-------------|------------------|-------------|-------------|-------------|--|---|-------------|-------------|-------------|
| 1 | -2.83070100 | 3.62067200  | -0.88240000 |                  |             |             |             |  | 1 | 1.85376100  | -1.12659600 | -1.69408100 |
| 6 | -1.34241000 | 2.06224900  | -1.01225400 | IM1 <sup>S</sup> |             |             |             |  | 1 | 1.68610200  | -2.33151400 | -2.96298000 |
| 1 | -0.58921700 | 2.69643700  | -1.49172200 | 27               | -0.34729300 | 0.40849000  | -0.18068500 |  | 6 | 3.28908400  | -2.72280700 | -1.55737300 |
| 6 | -1.89067500 | -0.01936400 | -0.13354900 | 7                | -1.21629700 | -1.61833600 | 0.16016100  |  | 1 | 3.53340000  | -2.57361900 | -0.49438300 |
| 6 | 0.93253800  | -1.51483100 | -0.08658200 | 7                | -2.24186800 | 0.80848300  | -0.35304400 |  | 1 | 4.04400300  | -2.16442900 | -2.12870300 |
| 6 | 1.31124900  | -0.46653500 | 0.92777000  | 7                | 0.78219400  | -2.82195800 | -1.16708800 |  | 1 | 3.42512500  | -3.78945800 | -1.78337300 |
| 1 | 1.92500300  | -0.85047200 | 1.76647100  | 6                | -2.59764800 | -1.42871400 | 0.40125300  |  | 6 | 0.18764600  | -4.02298300 | -1.73176700 |
| 1 | 0.41573900  | -0.00237100 | 1.36669900  | 6                | -3.42835200 | -2.40844900 | 0.91574800  |  | 1 | -0.16039100 | -3.78331500 | -2.75118000 |
| 6 | 3.42267300  | 0.22363200  | -0.22380300 | 1                | -3.01222300 | -3.37574500 | 1.19834300  |  | 1 | -0.73183500 | -4.23290600 | -1.15437700 |
| 1 | 3.38301700  | -0.47500600 | -1.07138400 | 6                | -4.80353700 | -2.15084900 | 1.07542600  |  | 6 | 1.05072000  | -5.27318800 | -1.77154200 |
| 1 | 3.87889700  | 1.14824800  | -0.61239400 | 1                | -5.44493400 | -2.93369700 | 1.48543300  |  | 1 | 1.88039300  | -5.17427700 | -2.48478000 |
| 6 | 4.28040300  | -0.38284600 | 0.86943100  | 6                | -5.34829500 | -0.93813200 | 0.70748300  |  | 1 | 0.45929100  | -6.14543900 | -2.08284900 |
| 1 | 3.94396200  | -1.39750400 | 1.12108000  | 1                | -6.41889000 | -0.75078000 | 0.81795800  |  | 1 | 1.48314200  | -5.50727000 | -0.78750100 |
| 1 | 5.31450200  | -0.47490400 | 0.50992000  | 6                | -4.52402700 | 0.09024100  | 0.19022200  |  | 1 | -0.25932300 | 0.10126300  | -1.61756100 |
| 1 | 4.30808400  | 0.20759900  | 1.79514200  | 6                | -4.99915100 | 1.36568600  | -0.20223200 |  | 8 | -0.66392400 | -2.70465600 | 2.11367100  |
| 6 | 1.85239200  | 1.93440200  | 0.63431600  | 1                | -6.06583200 | 1.58947800  | -0.12894800 |  | 6 | 1.39631500  | 0.76057100  | 0.34714700  |
| 1 | 2.18508400  | 2.62719900  | -0.15711500 | 6                | -4.10107500 | 2.30193600  | -0.67091900 |  | 6 | 0.74085400  | 1.85457000  | -0.02087200 |
| 1 | 0.76819400  | 2.10009300  | 0.74067400  | 1                | -4.43198700 | 3.29113700  | -0.99123800 |  | 6 | 2.69909000  | 0.32175600  | 0.80133200  |
| 6 | 2.54851600  | 2.27257900  | 1.93836400  | 6                | -2.73342600 | 1.99108600  | -0.72686800 |  | 6 | 3.86040700  | 0.62539200  | 0.06229800  |
| 1 | 3.64234600  | 2.28457700  | 1.83735100  | 1                | -2.00137300 | 2.72586700  | -1.07247300 |  | 6 | 2.84768500  | -0.45180900 | 1.97031700  |
| 1 | 2.24670600  | 3.27142900  | 2.28274700  | 6                | -3.12510900 | -0.15546900 | 0.06706900  |  | 6 | 5.11114700  | 0.17522000  | 0.47436400  |
| 1 | 2.29096700  | 1.56161000  | 2.73730200  | 6                | -0.39754900 | -2.41214400 | 0.97121600  |  | 6 | 4.10220900  | -0.88844900 | 2.38703100  |
| 1 | 1.60487600  | -0.92436900 | -2.25027400 | 6                | 0.88574900  | -2.82154200 | 0.27010400  |  | 6 | 5.24046000  | -0.58169000 | 1.63985700  |
| 8 | 1.89137300  | -2.48738000 | -0.18210600 | 1                | 1.65426800  | -2.09922000 | 0.58631000  |  | 6 | 0.81704500  | 3.29149100  | -0.17055700 |
| 1 | 1.64134600  | -3.03115000 | -0.94320900 | 1                | 1.19493900  | -3.78720000 | 0.71556600  |  | 6 | 1.80849400  | 3.89295800  | -0.96928800 |
|   |             |             |             | 6                | 1.89630200  | -2.21359300 | -1.88744200 |  | 6 | -0.11762900 | 4.12978300  | 0.46790300  |

|                  |             |             |             |   |             |             |             |                  |             |             |             |
|------------------|-------------|-------------|-------------|---|-------------|-------------|-------------|------------------|-------------|-------------|-------------|
| 6                | 1.86143700  | 5.27569700  | -1.11964300 | 1 | -2.34454300 | 4.01179700  | 0.53861900  | 1                | 3.71952400  | 0.41976000  | -2.76447300 |
| 6                | -0.05195200 | 5.51237800  | 0.32769100  | 6 | -3.52674800 | 2.26955100  | 0.13796900  | 1                | 5.47437400  | 0.56686700  | -2.84856200 |
| 6                | 0.93512900  | 6.09268500  | -0.47063000 | 1 | -4.47641800 | 2.81005800  | 0.15403400  | 1                | 4.52764700  | 1.78470200  | -1.97239300 |
| 1                | 3.76302300  | 1.21227300  | -0.85490700 | 6 | -3.53689000 | 0.87231000  | -0.09383100 | 1                | 0.77102900  | -2.39391900 | 0.90576500  |
| 1                | 1.95811400  | -0.69946000 | 2.55738300  | 6 | -4.70656800 | 0.09573700  | -0.30308100 | 1                | 2.63684200  | 1.63990500  | -0.08968200 |
| 1                | 5.99608600  | 0.42110600  | -0.11836300 | 1 | -5.68626100 | 0.57703300  | -0.30912900 |                  |             |             |             |
| 1                | 4.19165900  | -1.47675300 | 3.30372200  | 6 | -4.56999800 | -1.27112400 | -0.49113700 |                  |             |             |             |
| 1                | 6.22350400  | -0.93001600 | 1.96469100  | 1 | -5.44509600 | -1.90212200 | -0.65961400 | IM3 <sup>S</sup> |             |             |             |
| 1                | 2.53496400  | 3.25693800  | -1.48045400 | 6 | -3.30782200 | -1.86658000 | -0.47479300 | 27               | -0.74403900 | 0.12230500  | -0.15117100 |
| 1                | -0.89071900 | 3.67529900  | 1.09432500  | 1 | -3.19180800 | -2.94372900 | -0.62630400 | 8                | 1.45444100  | -3.47506300 | 0.16512400  |
| 1                | 2.63802600  | 5.72143700  | -1.74626500 | 6 | -2.28748200 | 0.19858300  | -0.09958400 | 7                | -0.23423700 | -1.84244000 | 0.12416800  |
| 1                | -0.77765400 | 6.14461300  | 0.84559500  | 6 | 1.27459000  | 0.43748100  | -0.13448100 | 7                | -2.53439600 | -0.63077200 | -0.02114600 |
| 1                | 0.98273200  | 7.17794300  | -0.58559800 | 6 | 2.39898500  | -0.51104400 | -0.42972200 | 7                | 3.33043200  | -1.89447700 | -0.45042600 |
| 1                | -0.89940100 | -1.67473800 | -0.82438500 | 1 | 2.15856800  | -1.49867400 | 0.00837600  | 6                | -1.33788400 | -2.67152600 | 0.27136300  |
|                  |             |             |             | 1 | 2.42263000  | -0.66129200 | -1.52189200 | 6                | -1.35828400 | -4.05183000 | 0.48230700  |
|                  |             |             |             | 6 | 3.99822200  | -0.34424900 | 1.37495700  | 1                | -0.41746200 | -4.59374500 | 0.54219200  |
| IM2 <sup>S</sup> |             |             |             | 1 | 4.89423900  | 0.22156600  | 1.67925100  | 6                | -2.58203400 | -4.73234200 | 0.62215500  |
| 27               | -0.47351200 | -1.77365700 | 0.16582200  | 1 | 4.29623900  | -1.41435400 | 1.37096200  | 1                | -2.56262400 | -5.81266000 | 0.78822100  |
| 8                | 1.64248700  | 1.71088400  | -0.10087700 | 6 | 2.87940600  | -0.13423200 | 2.36921600  | 6                | -3.79448400 | -4.07540800 | 0.56388300  |
| 7                | 0.05215800  | 0.02803000  | 0.02733400  | 1 | 2.56920700  | 0.91994000  | 2.41627500  | 1                | -4.73655900 | -4.61543200 | 0.68433400  |
| 7                | -2.16853200 | -1.16733100 | -0.27701200 | 1 | 3.20872500  | -0.42603300 | 3.37461700  | 6                | -3.82329500 | -2.67639200 | 0.35193800  |
| 7                | 3.65519200  | 0.08482300  | 0.01422900  | 1 | 1.99255800  | -0.74493100 | 2.13380400  | 6                | -5.01371800 | -1.91078700 | 0.29256600  |
| 6                | -1.07098400 | 0.89243100  | 0.10323600  | 6 | 4.76600900  | -0.09344000 | -0.91734100 | 1                | -5.97910100 | -2.40985700 | 0.40827800  |
| 6                | -1.09758000 | 2.26568600  | 0.33291900  | 1 | 4.92159500  | -1.16778000 | -1.15154100 | 6                | -4.93281000 | -0.54866800 | 0.09435300  |
| 1                | -0.17959600 | 2.82116100  | 0.50120600  | 1 | 5.67887400  | 0.22736900  | -0.39150800 | 1                | -5.82977900 | 0.07146300  | 0.04955700  |
| 6                | -2.33526600 | 2.93538300  | 0.35168400  | 6 | 4.60960500  | 0.70945500  | -2.18764900 | 6                | -3.67566100 | 0.05582800  | -0.06399400 |

|   |             |             |             |                  |             |             |             |   |             |             |             |
|---|-------------|-------------|-------------|------------------|-------------|-------------|-------------|---|-------------|-------------|-------------|
| 1 | -3.58412900 | 1.13252300  | -0.23012900 | 6                | 1.89120000  | 1.88426400  | 0.28948000  | 7 | -3.44058500 | -1.85785700 | 0.34879300  |
| 6 | -2.58865300 | -1.98236900 | 0.19708900  | 6                | 2.72170600  | 2.02431300  | -0.84537700 | 6 | 1.25206800  | -2.69344500 | -0.29179100 |
| 6 | 1.00471500  | -2.30910000 | 0.06794700  | 6                | 2.49505000  | 2.04719200  | 1.55505700  | 6 | 1.23118800  | -4.04539400 | -0.62577400 |
| 6 | 2.03615300  | -1.21285800 | -0.15977200 | 6                | 4.07583600  | 2.32332100  | -0.71853200 | 1 | 0.28517900  | -4.55359000 | -0.79017300 |
| 1 | 1.74276300  | -0.54005300 | -0.97542600 | 1                | 2.27405200  | 1.90377100  | -1.83695300 | 6 | 2.43430600  | -4.76609300 | -0.75426500 |
| 1 | 2.14284500  | -0.58124300 | 0.72999600  | 6                | 3.85106800  | 2.34311900  | 1.67723500  | 1 | 2.38424900  | -5.82446200 | -1.02036200 |
| 6 | 3.66267700  | -1.87009600 | -1.90514600 | 1                | 1.87583600  | 1.93665900  | 2.45027900  | 6 | 3.65973300  | -4.16946500 | -0.54931500 |
| 1 | 4.61927000  | -2.40204800 | -2.01621800 | 6                | 4.65513800  | 2.48184300  | 0.54368200  | 1 | 4.58627200  | -4.74022400 | -0.64617300 |
| 1 | 3.84269400  | -0.81528600 | -2.16658700 | 1                | 4.68729100  | 2.44455700  | -1.61785600 | 6 | 3.72921900  | -2.79733700 | -0.20878800 |
| 6 | 4.46069400  | -1.42111800 | 0.39881100  | 1                | 4.28525100  | 2.47339700  | 2.67265300  | 6 | 4.94258400  | -2.10603300 | 0.02976600  |
| 1 | 4.55806600  | -0.33645100 | 0.22897000  | 1                | 5.71615000  | 2.72297700  | 0.64146900  | 1 | 5.89133000  | -2.64196600 | -0.04883500 |
| 1 | 5.36942600  | -1.89987000 | 0.00527800  | 6                | 4.26237700  | -1.75020300 | 1.85491000  | 6 | 4.89932800  | -0.76925900 | 0.36570900  |
| 1 | -0.68131500 | -0.10602000 | -1.59866700 | 6                | 2.58671800  | -2.49456800 | -2.75535300 | 1 | 5.81234500  | -0.20730200 | 0.56948800  |
| 6 | 0.51395900  | 1.47396300  | 0.15143200  | 1                | 4.13126200  | -2.82915200 | 2.01692200  | 6 | 3.66100900  | -0.11410900 | 0.44980500  |
| 6 | -0.71769900 | 1.94798000  | -0.04350600 | 1                | 5.14188700  | -1.42850200 | 2.42542700  | 1 | 3.59825200  | 0.94320700  | 0.72000600  |
| 6 | -1.39391600 | 3.22586000  | -0.12192700 | 1                | 3.39520300  | -1.23438400 | 2.28682900  | 6 | 2.51650400  | -2.05992100 | -0.09503300 |
| 6 | -1.05858400 | 4.29176100  | 0.73738900  | 1                | 1.63663800  | -1.94586300 | -2.70061700 | 6 | -1.07844300 | -2.19920100 | -0.11092700 |
| 6 | -2.41544400 | 3.43860900  | -1.06824700 | 1                | 2.90448700  | -2.49238700 | -3.80484500 | 6 | -2.15819800 | -1.19219300 | 0.15643700  |
| 6 | -1.72296200 | 5.51113200  | 0.65675200  | 1                | 2.38912100  | -3.53358800 | -2.46091900 | 1 | -1.84547200 | -0.55320800 | 1.00069600  |
| 1 | -0.26644400 | 4.14359000  | 1.47664800  | 1                | 3.04985900  | -2.88534800 | -0.18794400 | 1 | -2.19491900 | -0.49751100 | -0.69669600 |
| 6 | -3.06692700 | 4.66547700  | -1.15802100 |                  |             |             |             | 6 | -3.81448200 | -1.92720500 | 1.76434600  |
| 1 | -2.67026200 | 2.62306800  | -1.75171700 |                  |             |             |             | 1 | -4.79638300 | -2.42387000 | 1.81922600  |
| 6 | -2.72960000 | 5.70622800  | -0.29170500 | IM4 <sup>s</sup> |             |             |             | 1 | -3.96515200 | -0.90364600 | 2.16898200  |
| 1 | -1.45043700 | 6.32233100  | 1.33713700  | 8                | -1.52439800 | -3.42131900 | -0.34299100 | 6 | -2.81003800 | -2.67659000 | 2.60868400  |
| 1 | -3.84774100 | 4.81165000  | -1.90908800 | 7                | 0.16199700  | -1.83155500 | -0.10754100 | 1 | -2.67863300 | -3.71240800 | 2.26430200  |
| 1 | -3.24732900 | 6.66623100  | -0.35537500 | 7                | 2.49971800  | -0.72524600 | 0.21452200  | 1 | -3.14200100 | -2.71516400 | 3.65400000  |

|    |             |             |             |                  |             |             |             |   |             |             |             |
|----|-------------|-------------|-------------|------------------|-------------|-------------|-------------|---|-------------|-------------|-------------|
| 1  | -1.82001800 | -2.19617500 | 2.60918900  | 1                | -1.70271600 | 2.08950700  | -2.39164000 | 1 | -5.26608500 | -1.28459500 | -1.33907700 |
| 6  | -4.51282500 | -1.29559600 | -0.47929100 | 1                | -4.63028100 | 2.64018800  | 1.58831800  | 6 | -3.30912000 | -1.68318700 | -2.16325400 |
| 1  | -4.63384600 | -0.21146900 | -0.27592600 | 1                | -4.06498600 | 2.78776500  | -2.68041600 | 1 | -3.66580900 | -1.99174400 | -3.14725600 |
| 1  | -5.45073700 | -1.77386000 | -0.15600500 | 1                | -5.54878300 | 3.06430100  | -0.69370700 | 6 | -1.92836600 | -1.63704800 | -1.92007300 |
| 6  | -4.30393600 | -1.53256200 | -1.95597100 | 1                | 0.01938000  | 4.23273700  | 1.20033800  | 1 | -1.21474800 | -1.87336100 | -2.71379400 |
| 1  | -3.39684300 | -1.04096500 | -2.33605600 | 1                | 3.19055000  | 2.46065200  | -1.10693500 | 6 | -2.25870800 | -0.97416400 | 0.27966200  |
| 1  | -5.14408100 | -1.12490900 | -2.53314500 | 1                | 1.25726300  | 6.38666100  | 1.25029700  | 6 | 0.22566600  | -2.10609700 | 1.62101300  |
| 1  | -4.22668700 | -2.60542400 | -2.18672600 | 1                | 4.42185200  | 4.61835000  | -1.07847400 | 6 | 1.69887300  | -2.11963700 | 1.25887600  |
| 1  | -2.51229800 | -3.31197200 | -0.20165000 | 1                | 3.46541300  | 6.58795500  | 0.11203100  | 1 | 2.22099800  | -1.22594200 | 1.63593200  |
| 27 | 0.74414100  | 0.10988700  | 0.22389300  |                  |             |             |             | 1 | 2.17705600  | -3.00923200 | 1.70462700  |
| 1  | 0.58875000  | -0.12343800 | 1.66364800  |                  |             |             |             | 6 | 3.10569200  | -1.67361400 | -0.69443300 |
| 6  | -0.45386000 | 1.49548600  | -0.05817600 |                  |             |             |             | 1 | 3.32476400  | -0.71224300 | -0.20813800 |
| 6  | 0.80036800  | 1.93387200  | 0.04003800  | IM5 <sup>S</sup> |             |             |             | 1 | 2.98924100  | -1.43985700 | -1.76365900 |
| 6  | -1.81097100 | 1.96566600  | -0.23748200 | 27               | 0.42002700  | -0.45166200 | -0.63999900 | 6 | 4.25804800  | -2.63320300 | -0.48075000 |
| 6  | -2.66706200 | 2.12248000  | 0.87253900  | 7                | -0.32702800 | -0.84341700 | 1.74825000  | 1 | 4.34986500  | -2.95653800 | 0.56686100  |
| 6  | -2.34803300 | 2.20962800  | -1.51709800 | 1                | 0.27821400  | -0.02454400 | 1.78928900  | 1 | 5.20042800  | -2.13342600 | -0.74338000 |
| 6  | -3.99199100 | 2.51699400  | 0.70881400  | 7                | -1.39599700 | -1.25996300 | -0.75482400 | 1 | 4.18756700  | -3.53164900 | -1.10866600 |
| 6  | -3.67629400 | 2.59943100  | -1.67585500 | 7                | 1.77121800  | -2.08759700 | -0.21253900 | 6 | 1.26118000  | -3.31914000 | -0.86769300 |
| 6  | -4.50869400 | 2.75554500  | -0.56655000 | 6                | -1.72318000 | -0.66352900 | 1.56075600  | 1 | 1.57585700  | -3.24159400 | -1.92024300 |
| 6  | 1.52262100  | 3.19030800  | 0.05337800  | 6                | -2.54922600 | -0.24363600 | 2.58237200  | 1 | 0.16295400  | -3.26124100 | -0.87671000 |
| 6  | 0.99106700  | 4.31999500  | 0.70690000  | 1                | -2.11359900 | -0.01674000 | 3.55709700  | 6 | 1.65969600  | -4.65218900 | -0.26533900 |
| 6  | 2.77275400  | 3.32366300  | -0.58037200 | 6                | -3.93866900 | -0.13371200 | 2.37520600  | 1 | 1.28823300  | -5.46182400 | -0.90798700 |
| 6  | 1.68646300  | 5.52474700  | 0.73276000  | 1                | -4.57762800 | 0.21312000  | 3.18951000  | 1 | 1.19534600  | -4.79409500 | 0.71930600  |
| 6  | 3.45892100  | 4.53463500  | -0.56781800 | 6                | -4.49099500 | -0.49444900 | 1.16679700  | 1 | 2.74323000  | -4.79027500 | -0.16204800 |
| 6  | 2.92291300  | 5.63975200  | 0.09485500  | 1                | -5.57109700 | -0.44054300 | 1.01033200  | 1 | 0.71455200  | -0.52115300 | -2.07307500 |
| 1  | -2.26883800 | 1.92964400  | 1.87364700  | 6                | -3.67202400 | -0.93243900 | 0.09618700  | 6 | 1.29798000  | 1.18323600  | -0.30510000 |
|    |             |             |             | 6                | -4.18705800 | -1.30324700 | -1.16976600 |   |             |             |             |

|   |             |             |             |                  |             |             |             |    |             |             |             |
|---|-------------|-------------|-------------|------------------|-------------|-------------|-------------|----|-------------|-------------|-------------|
| 6 | 0.00722300  | 1.36092900  | -0.51333400 | IM6 <sup>S</sup> |             |             |             | 1  | 0.36857600  | 3.15935800  | 1.89700500  |
| 6 | 2.54341500  | 1.86397500  | -0.03061900 | 7                | -0.57529100 | 0.14975800  | -1.69864400 | 6  | 0.55034700  | 4.87410400  | 0.59927000  |
| 6 | 3.63026000  | 1.80048100  | -0.92693600 | 1                | 0.39044400  | 0.10928000  | -2.02666000 | 1  | 0.58227400  | 5.13521600  | -0.46920000 |
| 6 | 2.72460800  | 2.58677100  | 1.16728500  | 7                | -2.06950900 | -0.45515300 | 0.41837300  | 1  | 1.46782000  | 5.27194800  | 1.05390300  |
| 6 | 4.83039400  | 2.44541700  | -0.64540700 | 7                | -0.60962000 | 2.65477100  | 0.13685800  | 1  | -0.29176000 | 5.41426500  | 1.05343600  |
| 6 | 3.93221900  | 3.21858800  | 1.45086900  | 6                | -1.36081900 | -1.03064800 | -1.79047200 | 6  | -1.97135400 | 3.04152300  | 0.56814900  |
| 6 | 4.99275800  | 3.15438400  | 0.54646600  | 6                | -1.36200800 | -1.87837000 | -2.87757300 | 1  | -1.89213300 | 3.25231700  | 1.64674300  |
| 6 | -1.04454400 | 2.34695300  | -0.58193500 | 1                | -0.70630600 | -1.67380000 | -3.72641800 | 1  | -2.62011800 | 2.15599400  | 0.48258500  |
| 6 | -2.26821700 | 2.05940300  | -1.21897100 | 6                | -2.22575200 | -2.99370400 | -2.89291500 | 6  | -2.63472100 | 4.18897200  | -0.16858300 |
| 6 | -0.89718600 | 3.61632300  | 0.01761600  | 1                | -2.21130700 | -3.66825600 | -3.75119200 | 1  | -2.03242700 | 5.10654000  | -0.18961800 |
| 6 | -3.29985000 | 2.99169800  | -1.24852200 | 6                | -3.10219500 | -3.21799200 | -1.85330800 | 1  | -3.58839100 | 4.43342900  | 0.31830800  |
| 6 | -1.93103500 | 4.54551600  | -0.01212000 | 1                | -3.78778200 | -4.06830700 | -1.87930500 | 1  | -2.87241600 | 3.90686500  | -1.20293800 |
| 6 | -3.14014100 | 4.23823700  | -0.64107600 | 6                | -3.12244700 | -2.36060800 | -0.72368900 | 27 | -0.29694000 | 0.46328800  | 0.40993500  |
| 1 | 3.50586500  | 1.24731200  | -1.86181400 | 6                | -3.98372100 | -2.53620300 | 0.38853400  | 6  | 2.60102100  | 0.45321000  | -0.54439100 |
| 1 | 1.89659900  | 2.64529500  | 1.88086100  | 1                | -4.70407100 | -3.35721500 | 0.39131700  | 6  | 1.53329400  | 0.24138400  | 0.25929900  |
| 1 | 5.65147400  | 2.39450000  | -1.36536900 | 6                | -3.89012600 | -1.65823300 | 1.44715200  | 1  | 2.50819800  | 1.21627000  | -1.33596200 |
| 1 | 4.04501500  | 3.77145700  | 2.38716100  | 1                | -4.54581100 | -1.74765400 | 2.31490000  | 6  | 1.06175200  | -0.66864100 | 1.25901900  |
| 1 | 5.93851200  | 3.65386300  | 0.76785800  | 6                | -2.91971100 | -0.64299200 | 1.42759200  | 6  | 0.34460500  | 0.04787700  | 2.31017500  |
| 1 | -2.39173700 | 1.08842300  | -1.70595400 | 1                | -2.81100100 | 0.03498700  | 2.27785400  | 6  | 0.98052900  | -2.10085900 | 1.19565000  |
| 1 | 0.04869700  | 3.86215300  | 0.50796600  | 6                | -2.20784100 | -1.27408800 | -0.67987900 | 6  | -0.38455500 | -0.73548300 | 3.26200600  |
| 1 | -4.23917100 | 2.74334500  | -1.75036400 | 6                | -1.25426500 | 1.39555200  | -1.77483100 | 1  | 0.74857200  | 1.00863600  | 2.66016900  |
| 1 | -1.79417500 | 5.52239200  | 0.45906300  | 6                | -0.43012000 | 2.58187200  | -1.31717700 | 6  | 0.21669900  | -2.79084100 | 2.10275200  |
| 1 | -3.95197800 | 4.96914200  | -0.65967100 | 1                | 0.64225600  | 2.43289800  | -1.51520800 | 1  | 1.52441200  | -2.62585000 | 0.40374100  |
| 8 | -0.44558400 | -3.11555300 | 1.66480400  | 1                | -0.75895600 | 3.48812100  | -1.85954500 | 6  | -0.47544200 | -2.09939500 | 3.14281500  |
|   |             |             |             | 6                | 0.47313700  | 3.37714000  | 0.82192800  | 1  | -0.86976300 | -0.23382100 | 4.10604400  |
|   |             |             |             | 1                | 1.41363300  | 2.89226500  | 0.51665800  | 1  | 0.14547400  | -3.87981100 | 2.04224600  |

|                  |             |             |             |   |             |             |             |   |             |             |             |
|------------------|-------------|-------------|-------------|---|-------------|-------------|-------------|---|-------------|-------------|-------------|
| 1                | -1.05276300 | -2.67478000 | 3.87186200  | 6 | -3.38374300 | -2.69787700 | -1.36480700 | 1 | 2.01887500  | 4.62118900  | 2.11568700  |
| 6                | 3.92388700  | -0.16241000 | -0.48477900 | 1 | -3.75066800 | -3.68607800 | -1.65031900 | 1 | 1.56362300  | 2.92261700  | 2.24048000  |
| 6                | 4.88266500  | 0.16010600  | -1.46596100 | 6 | -2.00116400 | -2.41662300 | -1.46968300 | 1 | 0.43176600  | 1.29363300  | 2.07113900  |
| 6                | 4.30887600  | -1.06911300 | 0.52404600  | 6 | -1.03221000 | -3.32645000 | -1.95646800 | 6 | 1.88432900  | 0.69843400  | 0.58614300  |
| 6                | 6.15577300  | -0.40116200 | -1.45185000 | 1 | -1.34541600 | -4.32523400 | -2.27184900 | 6 | 0.73321000  | 0.45163900  | 1.43060200  |
| 1                | 4.61095200  | 0.86895100  | -2.25468800 | 6 | 0.28783500  | -2.93901900 | -2.03933200 | 6 | 3.01267000  | -0.20216100 | 0.25981400  |
| 6                | 5.58183800  | -1.62744100 | 0.53776400  | 1 | 1.05492000  | -3.61175000 | -2.42565400 | 6 | 3.49284600  | -1.18631200 | 1.14157300  |
| 1                | 3.59706600  | -1.32559100 | 1.31234500  | 6 | 0.66625400  | -1.66415100 | -1.58487200 | 6 | 3.71904700  | -0.02189900 | -0.94564900 |
| 6                | 6.51533500  | -1.30259100 | -0.44995900 | 1 | 1.71620900  | -1.36031700 | -1.57910400 | 6 | 4.59435300  | -1.97679400 | 0.81613500  |
| 1                | 6.87508700  | -0.13139700 | -2.22967200 | 6 | -1.54097400 | -1.12779800 | -1.07814600 | 1 | 2.99962000  | -1.31851000 | 2.10783300  |
| 1                | 5.85295900  | -2.32539800 | 1.33435800  | 6 | -2.41749900 | 2.16408200  | 0.17173900  | 6 | 4.82379400  | -0.80297000 | -1.27104100 |
| 1                | 7.51401700  | -1.74490000 | -0.43471400 | 6 | -1.38477800 | 3.22371600  | 0.54681100  | 1 | 3.37286200  | 0.74810000  | -1.64397200 |
| 8                | -2.44081200 | 1.46865300  | -2.01217700 | 1 | -1.79171600 | 4.23465100  | 0.35992800  | 6 | 5.26338000  | -1.79655800 | -0.39386400 |
|                  |             |             |             | 1 | -1.23080500 | 3.14372900  | 1.63335200  | 1 | 4.94124500  | -2.73428100 | 1.52397800  |
|                  |             |             |             | 6 | -0.24132300 | 3.30748300  | -1.58558100 | 1 | 5.34517500  | -0.63855300 | -2.21777400 |
|                  |             |             |             | 1 | -0.19074300 | 4.39983300  | -1.75454600 | 1 | 6.12655800  | -2.41621500 | -0.64721300 |
| IM7 <sup>s</sup> |             |             |             | 1 | -1.24999500 | 2.98972000  | -1.88248300 | 6 | 0.06205800  | -0.77977000 | 1.87642900  |
| 27               | 0.12663400  | 0.97281800  | -0.34905400 | 6 | 0.78534600  | 2.57791100  | -2.42031800 | 6 | -1.12046600 | -0.62063200 | 2.62960900  |
| 7                | -1.81546900 | 1.07944400  | -0.37620500 | 1 | 1.81901000  | 2.83474000  | -2.15272100 | 6 | 0.42007900  | -2.09750800 | 1.52814200  |
| 7                | -0.21061800 | -0.79192600 | -1.09687300 | 1 | 0.64969800  | 2.81646200  | -3.48407500 | 6 | -1.91116900 | -1.70283200 | 2.99737800  |
| 7                | -0.08865600 | 3.02914700  | -0.12969700 | 1 | 0.68290600  | 1.47645000  | -2.33926300 | 1 | -1.43533200 | 0.39230300  | 2.90204800  |
| 1                | 2.28402100  | 1.71699100  | 0.70966300  | 6 | 0.95537100  | 3.93962700  | 0.40062700  | 6 | -0.37134000 | -3.18237800 | 1.89365400  |
| 6                | -2.44761700 | -0.10961500 | -0.65341400 | 1 | 0.67226500  | 4.97178800  | 0.11406700  | 1 | 1.31677700  | -2.27944100 | 0.93595900  |
| 6                | -3.80567000 | -0.42503800 | -0.57210900 | 1 | 1.88244400  | 3.71874100  | -0.15068100 | 6 | -1.54339600 | -2.99675800 | 2.62704500  |
| 1                | -4.50571500 | 0.34011400  | -0.24203000 | 6 | 1.22182100  | 3.90196700  | 1.88572200  | 1 | -2.82731400 | -1.53345000 | 3.56825400  |
| 6                | -4.24720800 | -1.71594600 | -0.91541100 | 1 | 0.35099300  | 4.20035500  | 2.48399000  | 1 | -0.06783200 | -4.18910500 | 1.59331500  |
| 1                | -5.31449700 | -1.93848400 | -0.83648900 |   |             |             |             |   |             |             |             |

|                  |             |             |             |                  |             |             |             |    |             |             |             |
|------------------|-------------|-------------|-------------|------------------|-------------|-------------|-------------|----|-------------|-------------|-------------|
| 1                | -2.16487200 | -3.85091300 | 2.90511700  | 6                | -1.99732000 | 2.03399700  | -0.43161800 | 6  | -1.47433100 | -1.57389700 | 0.55514100  |
| 8                | -3.60162500 | 2.34044500  | 0.42661200  | 1                | -2.63598200 | 2.84362100  | -0.03482600 | 6  | -1.01348000 | -1.84870300 | -0.86101100 |
|                  |             |             |             | 1                | -2.19649600 | 1.97423500  | -1.51080200 | 8  | -1.69884100 | -2.38550300 | -1.70353400 |
|                  |             |             |             | 6                | -2.48210100 | 0.94693900  | 1.64917600  | 7  | 0.20338400  | -1.20120500 | -1.20139300 |
| IM8 <sup>s</sup> |             |             |             | 1                | -3.39098500 | 1.55556300  | 1.83186000  | 6  | 1.45147100  | -1.33715500 | -0.48788400 |
| 27               | -0.62818400 | -0.39603300 | -0.00450600 | 1                | -1.62592700 | 1.56226400  | 1.96470600  | 6  | 2.03437500  | -2.55790600 | -0.17952400 |
| 7                | 0.21221500  | 1.26476400  | -0.12606400 | 6                | -2.51017100 | -0.31971600 | 2.47021600  | 6  | 3.36820900  | -0.11799400 | 0.42802700  |
| 7                | 1.08531700  | -1.10055700 | 0.02259900  | 1                | -3.34981800 | -0.98333800 | 2.21189900  | 6  | 3.29311800  | -2.56306600 | 0.44685400  |
| 7                | -2.32986600 | 0.73276900  | 0.19116300  | 1                | -2.62316500 | -0.07751100 | 3.53562300  | 1  | 1.52424500  | -3.49040800 | -0.43173800 |
| 1                | -2.11467400 | -2.48861100 | 0.80256100  | 1                | -1.56106500 | -0.86846700 | 2.34620700  | 6  | 3.94805900  | -1.37792800 | 0.73029800  |
| 6                | 1.59305400  | 1.21275400  | -0.10607900 | 6                | -3.55323200 | 0.15211300  | -0.39282300 | 1  | 3.76062200  | -3.51663000 | 0.70173200  |
| 6                | 2.51547700  | 2.25832600  | -0.16170900 | 1                | -4.40796600 | 0.83985800  | -0.23416600 | 1  | 4.92636700  | -1.39615900 | 1.21715200  |
| 1                | 2.15538200  | 3.28336500  | -0.22709200 | 1                | -3.78809700 | -0.75827100 | 0.17849600  | 27 | -0.44689200 | 0.66718600  | -0.57373900 |
| 6                | 3.89092200  | 1.96491900  | -0.12990500 | 6                | -3.39418800 | -0.19801500 | -1.85462500 | 1  | 0.33507600  | -1.26748600 | -2.21456800 |
| 1                | 4.60276300  | 2.79360600  | -0.17412000 | 1                | -3.46470000 | 0.67466100  | -2.51661500 | 6  | 2.08455200  | -0.11556000 | -0.19112700 |
| 6                | 4.36615700  | 0.66851400  | -0.03864300 | 1                | -4.16869300 | -0.90638800 | -2.17778400 | 6  | 3.95057700  | 1.13540300  | 0.73548800  |
| 1                | 5.43919600  | 0.46488800  | -0.00680000 | 1                | -2.40170700 | -0.65388400 | -2.01324100 | 6  | 3.22196400  | 2.28636000  | 0.45818300  |
| 6                | 3.45801200  | -0.41678700 | 0.02146300  | 8                | -0.14561400 | 3.55549800  | -0.35414600 | 6  | 1.95345900  | 2.21519600  | -0.11201900 |
| 6                | 3.83865800  | -1.77950800 | 0.13260300  | 8                | -1.56120600 | -2.21027400 | 0.06375200  | 1  | 4.93719900  | 1.18094900  | 1.19978100  |
| 1                | 4.89666000  | -2.04847400 | 0.16813200  | 6                | -1.66853200 | -3.10944800 | -1.02563800 | 1  | 3.63212200  | 3.27151900  | 0.69009200  |
| 6                | 2.84840000  | -2.74163100 | 0.20491600  | 1                | -1.41397200 | -4.13806800 | -0.72706600 | 1  | 1.35311500  | 3.10830800  | -0.29084900 |
| 1                | 3.10053200  | -3.79965300 | 0.30432100  | 1                | -2.67713400 | -3.10106400 | -1.46906000 | 7  | 1.36842500  | 1.04305600  | -0.45596000 |
| 6                | 1.49828300  | -2.37602300 | 0.15100100  | 1                | -0.94867700 | -2.77111000 | -1.78018100 | 7  | -1.92731200 | -0.17585800 | 0.55399300  |
| 1                | 0.71593600  | -3.13405900 | 0.22001400  |                  |             |             |             | 1  | -2.25280100 | -2.30137400 | 0.84061100  |
| 6                | 2.06992600  | -0.12443700 | -0.02390100 |                  |             |             |             | 1  | -0.64133100 | -1.66153000 | 1.26944700  |
| 6                | -0.52326600 | 2.39285600  | -0.27462200 | IM9 <sup>s</sup> |             |             |             | 6  | -1.91323300 | 0.46063000  | 1.88660800  |



|                   |             |             |             |   |             |             |             |                   |             |             |             |
|-------------------|-------------|-------------|-------------|---|-------------|-------------|-------------|-------------------|-------------|-------------|-------------|
| 1                 | -1.97770500 | 1.54134100  | 1.69452700  | 6 | -1.81267300 | -1.15634300 | -0.82452400 | 6                 | 2.34909600  | -0.21092000 | 1.57040800  |
| 1                 | -0.90310900 | 0.28929900  | 2.29255900  | 6 | -2.73785300 | -2.08454200 | -1.25978300 | 1                 | 1.30707100  | 0.06684200  | 1.80768900  |
| 6                 | -3.16076700 | 0.07542400  | -0.23816100 | 1 | -2.42622800 | -2.93164700 | -1.87474100 | 1                 | 2.93590300  | 0.70992200  | 1.71108800  |
| 1                 | -3.45662000 | 1.10450900  | 0.01008700  | 6 | -4.08412000 | -1.92313000 | -0.88244700 | 6                 | 2.78963900  | -1.30022300 | 2.52969100  |
| 1                 | -2.86974400 | 0.11269400  | -1.30377000 | 1 | -4.82798700 | -2.64189200 | -1.23193600 | 1                 | 2.76502100  | -0.92029900 | 3.55992600  |
| 6                 | -2.96636900 | -0.00626900 | 2.86749100  | 6 | -4.46670600 | -0.88076400 | -0.05908700 | 1                 | 3.80785800  | -1.66422000 | 2.33678200  |
| 1                 | -2.96476800 | -1.09809100 | 3.00756200  | 1 | -5.51151300 | -0.77540600 | 0.24322000  | 1                 | 2.10488200  | -2.15881100 | 2.49404100  |
| 1                 | -2.78059500 | 0.44412900  | 3.85177300  | 6 | -3.52766400 | 0.07253000  | 0.40917700  | 1                 | 0.78577500  | 2.48402200  | -2.77114000 |
| 1                 | -3.97949100 | 0.29566800  | 2.56807400  | 6 | -3.83723100 | 1.16257900  | 1.26154800  | 5                 | 1.55163700  | 1.87152700  | -2.04740700 |
| 6                 | -4.29224100 | -0.91762800 | -0.08010700 | 1 | -4.85972000 | 1.31292100  | 1.61174200  | 1                 | 2.72505300  | 1.91083400  | -2.37339400 |
| 1                 | -4.60569300 | -1.05711500 | 0.96274500  | 6 | -2.80497900 | 2.00402400  | 1.64485400  | 1                 | 1.27269700  | 0.60453600  | -2.09918300 |
| 1                 | -5.16770800 | -0.56469800 | -0.64106300 | 1 | -2.98820400 | 2.83559800  | 2.32825700  | 8                 | 1.35532800  | 2.23274600  | -0.59013300 |
| 1                 | -4.02455600 | -1.89937800 | -0.49424100 | 6 | -1.50641700 | 1.81289200  | 1.16911800  | 6                 | 0.82516700  | 3.50710900  | -0.34074300 |
| 8                 | -1.09592400 | 2.35156700  | -0.15615300 | 1 | -0.69773500 | 2.47386300  | 1.48184800  | 1                 | 0.82100700  | 3.70181500  | 0.74177100  |
| 6                 | -1.19453000 | 3.13007800  | -1.28149700 | 6 | -2.18008000 | -0.06987400 | -0.01766200 | 1                 | 1.45652200  | 4.27291800  | -0.81675300 |
| 1                 | -1.97617400 | 2.80414600  | -2.01143100 | 6 | 0.38864400  | -1.77127300 | 0.03178400  | 1                 | -0.20040800 | 3.61563100  | -0.73574300 |
| 1                 | -1.45478100 | 4.17677000  | -1.01821800 | 6 | 1.87634000  | -1.80910500 | -0.25081400 | 1                 | -0.14321200 | -1.58584300 | -1.98624300 |
| 1                 | -0.24592300 | 3.19714100  | -1.86883500 | 1 | 2.31286600  | -2.67831200 | 0.28013200  |                   |             |             |             |
|                   |             |             |             | 1 | 2.07162300  | -1.95058000 | -1.32653100 |                   |             |             |             |
|                   |             |             |             | 6 | 3.68204700  | -0.17017400 | -0.52096600 | IM11 <sup>s</sup> |             |             |             |
| IM10 <sup>s</sup> |             |             |             | 1 | 3.82250700  | 0.91385300  | -0.38730700 | 27                | 0.35291700  | -0.12521300 | -0.42863700 |
| 27                | 0.42001800  | 0.54616600  | -0.63143700 | 1 | 3.52609300  | -0.30277700 | -1.60325500 | 7                 | 2.04980300  | 0.89756900  | -0.58083300 |
| 8                 | -0.11886900 | -2.12113900 | 1.07270400  | 6 | 4.91822700  | -0.92738700 | -0.07385900 | 7                 | 1.51372500  | -1.53504900 | 0.08928700  |
| 7                 | -0.40160900 | -1.23022900 | -1.06613600 | 1 | 5.77514900  | -0.66541400 | -0.70972700 | 7                 | 0.02542200  | 2.98443500  | -0.62174700 |
| 7                 | -1.17005600 | 0.82689600  | 0.30599000  | 1 | 4.78655100  | -2.01813100 | -0.14076800 | 1                 | -0.21349700 | 1.99753700  | -0.25316400 |
| 7                 | 2.42265800  | -0.51821300 | 0.13229000  | 1 | 5.20251000  | -0.68795000 | 0.96030800  | 6                 | 3.13207900  | 0.19525700  | -0.04536400 |

|   |             |             |             |   |             |             |             |                   |             |             |             |
|---|-------------|-------------|-------------|---|-------------|-------------|-------------|-------------------|-------------|-------------|-------------|
| 6 | 4.43742000  | 0.63519000  | 0.16696300  | 1 | -1.07798400 | 4.65876900  | -1.24198000 | 1                 | -2.16081600 | -1.92258200 | 1.20249700  |
| 1 | 4.72042100  | 1.64074800  | -0.13378200 | 1 | -1.90350400 | 3.57864800  | -0.10101000 | 6                 | -3.26997200 | -4.59998100 | -0.59495300 |
| 6 | 5.38889400  | -0.22664000 | 0.75038700  | 6 | -1.98501700 | 2.91905500  | -2.15578500 | 1                 | -3.11973600 | -4.79047100 | -2.74176300 |
| 1 | 6.40206300  | 0.15093400  | 0.91068300  | 1 | -1.47673000 | 3.08090400  | -3.11532700 | 1                 | -3.26593800 | -4.11523000 | 1.51082000  |
| 6 | 5.08402100  | -1.52299900 | 1.10930300  | 1 | -2.99618800 | 3.33464300  | -2.24873100 | 1                 | -3.74851700 | -5.57225800 | -0.45662400 |
| 1 | 5.83731400  | -2.17929100 | 1.55119300  | 1 | -2.08859900 | 1.83838900  | -1.98908400 | 8                 | 3.28461700  | 2.63373000  | -1.52638600 |
| 6 | 3.77407000  | -2.01797600 | 0.89494300  | 1 | -1.25274000 | -0.53702200 | -2.23048500 |                   |             |             |             |
| 6 | 3.35687200  | -3.33642600 | 1.19945900  | 6 | -1.34790900 | 0.24968600  | -0.16466300 |                   |             |             |             |
| 1 | 4.07067000  | -4.03958500 | 1.63549800  | 6 | -1.37480900 | -0.78027600 | -1.15649600 | IM12 <sup>s</sup> |             |             |             |
| 6 | 2.05633600  | -3.71554600 | 0.92836900  | 6 | -2.40668200 | 0.71265400  | 0.70445500  | 6                 | -3.77847200 | -0.33982200 | 0.26761200  |
| 1 | 1.70652300  | -4.72748700 | 1.13881700  | 6 | -3.73272300 | 0.82269900  | 0.22259700  | 6                 | -2.39835200 | -0.11595500 | 0.02978000  |
| 6 | 1.16148300  | -2.79151000 | 0.37054600  | 6 | -2.17002900 | 1.11406400  | 2.03758400  | 6                 | -1.49823000 | -1.15632700 | -0.31047500 |
| 1 | 0.12754900  | -3.06705900 | 0.14525400  | 6 | -4.74590000 | 1.35786500  | 1.01062300  | 6                 | -2.00363200 | -2.45539900 | -0.40574000 |
| 6 | 2.80810800  | -1.14198200 | 0.32916500  | 1 | -3.94863200 | 0.47693500  | -0.79311800 | 6                 | -3.37314200 | -2.68443900 | -0.17168500 |
| 6 | 2.23632000  | 2.04629300  | -1.27204500 | 6 | -3.18884100 | 1.63132900  | 2.83043700  | 6                 | -4.25207200 | -1.66899000 | 0.15736100  |
| 6 | 0.92436400  | 2.66943600  | -1.76648900 | 1 | -1.16573300 | 0.98255700  | 2.44977500  | 1                 | -1.34115200 | -3.27855700 | -0.65674400 |
| 1 | 1.14482300  | 3.59295500  | -2.31802100 | 6 | -4.48114500 | 1.77315400  | 2.31788400  | 1                 | -3.74716700 | -3.70839700 | -0.25541200 |
| 1 | 0.37990000  | 1.96293500  | -2.40968200 | 1 | -5.75901400 | 1.43927500  | 0.60770400  | 1                 | -5.31043300 | -1.87594000 | 0.33334200  |
| 6 | 0.71278500  | 3.79844500  | 0.43442100  | 1 | -2.97765900 | 1.92155500  | 3.86352200  | 6                 | -4.57716800 | 0.78711200  | 0.59572700  |
| 1 | 0.51560400  | 4.85537400  | 0.19898500  | 1 | -5.27972100 | 2.18458000  | 2.93934600  | 6                 | -3.97877000 | 2.03369200  | 0.66841500  |
| 1 | 1.79332100  | 3.65071400  | 0.31317900  | 6 | -2.02907600 | -2.07876800 | -0.95100400 | 6                 | -2.60920800 | 2.17660700  | 0.42580900  |
| 6 | 0.27596200  | 3.43366200  | 1.82582000  | 6 | -2.30870100 | -2.92035600 | -2.04444900 | 1                 | -5.64519600 | 0.65981600  | 0.78465400  |
| 1 | -0.80570200 | 3.54821800  | 1.97922100  | 6 | -2.38768900 | -2.54438800 | 0.33128700  | 1                 | -4.56265300 | 2.92201800  | 0.91779500  |
| 1 | 0.78574200  | 4.07776300  | 2.55285500  | 6 | -2.91788600 | -4.16001200 | -1.87161500 | 1                 | -2.11962100 | 3.15334500  | 0.48457700  |
| 1 | 0.54709600  | 2.39339400  | 2.05220900  | 1 | -2.03543700 | -2.58447600 | -3.04989400 | 7                 | -0.19617400 | -0.68343500 | -0.52321400 |
| 6 | -1.28354500 | 3.60161100  | -1.01090800 | 6 | -2.99932700 | -3.78173000 | 0.50426800  | 7                 | -1.81930100 | 1.13142000  | 0.10982100  |

|    |             |             |             |                   |             |             |             |   |             |             |             |
|----|-------------|-------------|-------------|-------------------|-------------|-------------|-------------|---|-------------|-------------|-------------|
| 27 | -0.05089200 | 1.21059200  | -0.28900900 | 1                 | 1.30640700  | 3.26965600  | -2.14539200 | 1 | -2.69837000 | -0.43581200 | -1.50300300 |
| 6  | 0.82721500  | -1.55487600 | -0.69357600 |                   |             |             |             | 1 | -3.16275300 | -1.99605400 | -0.77032900 |
| 6  | 2.18877300  | -0.91845600 | -0.98232800 |                   |             |             |             | 6 | -2.04298700 | -1.27670900 | 1.73713500  |
| 7  | 2.81461800  | -0.13983500 | 0.13765900  | IM13 <sup>s</sup> |             |             |             | 1 | -2.30257400 | -0.70390700 | 2.63936400  |
| 6  | 2.33457100  | -0.53927200 | 1.49110700  | 27                | -0.18290100 | 1.09581300  | -0.35554000 | 1 | -0.94796600 | -1.23996200 | 1.64094500  |
| 6  | 4.29397100  | -0.07643400 | -0.00817900 | 8                 | -0.93517800 | -2.91055400 | -1.26051100 | 6 | -2.55349200 | -2.69257800 | 1.79013900  |
| 6  | 2.93880700  | 0.30016000  | 2.58538400  | 7                 | -0.05508200 | -0.82032100 | -0.71806000 | 1 | -2.20439900 | -3.28351500 | 0.93257600  |
| 6  | 5.01310700  | -1.34953200 | 0.35822600  | 7                 | 1.49793200  | 0.87988300  | 0.39854400  | 1 | -3.65060900 | -2.75028100 | 1.83556500  |
| 1  | 1.24457600  | -0.37680500 | 1.45317400  | 7                 | -2.57302100 | -0.47455900 | 0.58537400  | 1 | -2.17054400 | -3.17761300 | 2.69633400  |
| 1  | 2.50720700  | -1.61877300 | 1.62271500  | 6                 | 1.27298900  | -1.24438000 | -0.61549100 | 6 | -3.94333500 | 0.05290200  | 0.87265900  |
| 1  | 4.01467200  | 0.12897300  | 2.72912900  | 6                 | 1.84535200  | -2.45143300 | -1.02106300 | 1 | -3.80797300 | 0.79691600  | 1.67157600  |
| 1  | 2.78120900  | 1.37114000  | 2.39126300  | 1                 | 1.23289800  | -3.19317500 | -1.52590300 | 1 | -4.52231200 | -0.78152500 | 1.29902900  |
| 1  | 2.44605700  | 0.06739200  | 3.53716100  | 6                 | 3.20865400  | -2.70159200 | -0.76866100 | 6 | -4.66061700 | 0.65382500  | -0.30729900 |
| 1  | 4.48095000  | 0.20430200  | -1.05536800 | 1                 | 3.63146900  | -3.65184800 | -1.10529800 | 1 | -4.07597600 | 1.45055300  | -0.78478400 |
| 1  | 4.64204300  | 0.77025600  | 0.60142200  | 6                 | 4.01781000  | -1.79674100 | -0.11006600 | 1 | -5.59547500 | 1.10672500  | 0.04548500  |
| 1  | 6.08554500  | -1.24204100 | 0.15454800  | 1                 | 5.07033000  | -2.01668800 | 0.08323900  | 1 | -4.93009000 | -0.09522200 | -1.06276800 |
| 1  | 4.90723500  | -1.59467000 | 1.42351200  | 6                 | 3.47760700  | -0.56126300 | 0.32164800  | 1 | -2.46225500 | 2.45591300  | 0.43544600  |
| 1  | 4.65756200  | -2.21331200 | -0.21931800 | 6                 | 4.20234200  | 0.43651800  | 1.02087600  | 5 | -1.72814900 | 2.58091900  | -0.53522500 |
| 1  | 2.85673600  | -1.74746900 | -1.24586000 | 1                 | 5.25592600  | 0.27163400  | 1.25820300  | 1 | -2.20117400 | 3.23280300  | -1.45100900 |
| 1  | 2.12750400  | -0.22320600 | -1.83286900 | 6                 | 3.55924900  | 1.60217700  | 1.39511300  | 1 | -1.58603100 | 1.40370900  | -1.15013400 |
| 8  | 0.78787700  | -2.78473100 | -0.65951400 | 1                 | 4.08752500  | 2.38368000  | 1.94452100  | 8 | -0.37341700 | 3.02361900  | -0.11509000 |
| 1  | 2.43632800  | 0.87373300  | -0.03856100 | 6                 | 2.21150900  | 1.79662100  | 1.06798500  | 6 | 0.35862400  | 3.80645100  | -1.03483400 |
| 8  | 1.63593700  | 2.02284000  | -0.51005800 | 1                 | 1.67605300  | 2.70656300  | 1.34969000  | 1 | 0.25500600  | 3.44329300  | -2.07103700 |
| 6  | 2.08232900  | 2.64146600  | -1.66992900 | 6                 | 2.11006900  | -0.29734500 | 0.04006000  | 1 | 0.01028500  | 4.85046300  | -1.00028800 |
| 1  | 2.94452600  | 3.30723200  | -1.46631400 | 6                 | -1.03503700 | -1.72351300 | -0.94904500 | 1 | 1.42376700  | 3.78073800  | -0.76200900 |
| 1  | 2.41886600  | 1.92618100  | -2.45254900 | 6                 | -2.44213900 | -1.16949100 | -0.72694400 | 1 | -1.88529300 | 0.35083000  | 0.50081500  |

|                   |             |             |             |   |             |             |             |                   |             |             |             |
|-------------------|-------------|-------------|-------------|---|-------------|-------------|-------------|-------------------|-------------|-------------|-------------|
|                   |             |             |             | 1 | 0.05090800  | -2.52827100 | -0.18337300 | 6                 | -2.34697900 | -2.77783900 | -2.49650700 |
|                   |             |             |             | 6 | 2.04429700  | -3.50943900 | 2.28209700  | 1                 | -1.00740300 | -1.07972100 | -2.46314500 |
| IM14 <sup>S</sup> |             |             |             | 1 | 2.44054100  | -4.51176700 | 2.51256600  | 6                 | -3.26441200 | -3.54531200 | -1.77690500 |
| 27                | 0.10060700  | 0.83350800  | 0.38330900  | 1 | 1.28757300  | -3.29541600 | 3.07370200  | 1                 | -4.28826200 | -3.78674500 | 0.11045600  |
| 8                 | 2.70954000  | -2.05013200 | -0.89815100 | 6 | 0.51408600  | -4.70753800 | 0.83492900  | 1                 | -2.09585100 | -3.04886800 | -3.52520400 |
| 7                 | 1.77893300  | -0.12290400 | 0.04362600  | 1 | -0.43759000 | -4.53675700 | 1.38994900  | 1                 | -3.73318600 | -4.41843500 | -2.23640000 |
| 7                 | 1.15343700  | 2.36424300  | 0.08066300  | 1 | 0.99193800  | -5.56691100 | 1.33178100  | 6                 | 0.21804600  | -5.06327700 | -0.60396100 |
| 7                 | 1.42799300  | -3.58323700 | 0.96847400  | 1 | -1.13201600 | 1.56862900  | 1.25267400  | 6                 | 3.16303400  | -2.49571700 | 2.37327400  |
| 6                 | 2.82912000  | 0.74184700  | -0.31634400 | 6 | -1.41070100 | -0.14620700 | 0.02236600  | 1                 | 1.14866200  | -5.25289400 | -1.15721600 |
| 6                 | 4.17134300  | 0.42077100  | -0.55395000 | 6 | -1.89552900 | 0.98778700  | 0.59418600  | 1                 | -0.41025300 | -5.96248500 | -0.66209800 |
| 1                 | 4.55270800  | -0.59193700 | -0.41301700 | 6 | -3.14980200 | 1.71964600  | 0.55675400  | 1                 | -0.32861300 | -4.26811700 | -1.13190400 |
| 6                 | 5.08404300  | 1.43528600  | -0.89672100 | 6 | -4.24443400 | 1.27523800  | -0.21435500 | 1                 | 2.80208200  | -1.46046500 | 2.28002700  |
| 1                 | 6.12455700  | 1.16214900  | -1.08579400 | 6 | -3.31011000 | 2.90577300  | 1.30176700  | 1                 | 3.66623200  | -2.56323500 | 3.34695500  |
| 6                 | 4.69242700  | 2.75573700  | -0.99413600 | 6 | -5.43615400 | 1.98963400  | -0.23497200 | 1                 | 3.91573500  | -2.66747300 | 1.59041400  |
| 1                 | 5.40791300  | 3.52873100  | -1.28356700 | 1 | -4.14558300 | 0.36488900  | -0.81014000 | 1                 | 3.21568400  | -1.39556600 | -1.40772200 |
| 6                 | 3.36147900  | 3.13204600  | -0.68641800 | 6 | -4.50408800 | 3.61792200  | 1.27726400  |                   |             |             |             |
| 6                 | 2.88228700  | 4.46548700  | -0.69877600 | 1 | -2.47773100 | 3.26108600  | 1.91837700  |                   |             |             |             |
| 1                 | 3.55045600  | 5.28062100  | -0.98289500 | 6 | -5.57724100 | 3.16394700  | 0.50900600  | IM15 <sup>S</sup> |             |             |             |
| 6                 | 1.56761000  | 4.70319500  | -0.32972100 | 1 | -6.26819800 | 1.62800700  | -0.84448600 | 27                | 0.00155800  | 0.20237500  | -0.32810100 |
| 1                 | 1.16343300  | 5.71713900  | -0.32028800 | 1 | -4.60061900 | 4.53374100  | 1.86586700  | 7                 | 0.84618100  | -1.30991200 | -1.24552800 |
| 6                 | 0.74371400  | 3.64926300  | 0.06689300  | 1 | -6.51672000 | 3.72065800  | 0.48926700  | 7                 | 1.91342900  | 0.76601100  | -0.01068500 |
| 1                 | -0.28490200 | 3.82787100  | 0.38953200  | 6 | -2.06080300 | -1.28353800 | -0.59064600 | 7                 | -0.09330700 | -1.19425000 | 1.41972900  |
| 6                 | 2.44546400  | 2.10649600  | -0.32185100 | 6 | -2.98997600 | -2.06951400 | 0.12152700  | 6                 | 2.21303500  | -1.28253700 | -1.14452100 |
| 6                 | 1.82896700  | -1.41853600 | -0.12709600 | 6 | -1.73826900 | -1.67383700 | -1.90617300 | 6                 | 3.07181000  | -2.30390100 | -1.56439600 |
| 6                 | 0.85319700  | -2.32885100 | 0.54424400  | 6 | -3.57401500 | -3.18965500 | -0.46239600 | 1                 | 2.64397200  | -3.21354300 | -1.99273500 |
| 1                 | 0.36086800  | -1.75117600 | 1.35686400  | 1 | -3.24720400 | -1.78252600 | 1.14506400  | 6                 | 4.46489100  | -2.14424700 | -1.47775200 |

|   |             |             |             |   |             |             |             |                   |             |             |             |
|---|-------------|-------------|-------------|---|-------------|-------------|-------------|-------------------|-------------|-------------|-------------|
| 1 | 5.10825500  | -2.95185400 | -1.83647900 | 1 | -0.22974100 | -1.48560700 | 4.30161600  | 6                 | -0.30322000 | 4.02724900  | 1.26914900  |
| 6 | 5.04093400  | -0.99485700 | -0.96411400 | 1 | 1.48363400  | -1.10756000 | 4.50417000  | 1                 | 0.63187100  | 5.24909700  | -0.26624300 |
| 1 | 6.12581000  | -0.88265800 | -0.91155200 | 1 | 1.00879600  | -2.56209900 | 3.61663800  | 1                 | -1.33575700 | 2.63548500  | 2.53471100  |
| 6 | 4.21066600  | 0.03904400  | -0.47060300 | 8 | -0.68716900 | -3.06484000 | -1.21343400 | 1                 | -0.15964900 | 4.76774100  | 2.05880200  |
| 6 | 4.67965000  | 1.22176400  | 0.15367600  | 6 | -1.62380100 | -0.05210800 | -1.56171400 |                   |             |             |             |
| 1 | 5.75526200  | 1.40496400  | 0.22076800  | 6 | -0.83306600 | 1.12406600  | -1.82761900 |                   |             |             |             |
| 6 | 3.77363100  | 2.11071100  | 0.69009800  | 1 | -0.29890500 | 1.27079400  | -2.77351600 |                   |             |             |             |
| 1 | 4.10529600  | 3.01890400  | 1.19642000  | 1 | -1.35915900 | -0.90623000 | -2.19586300 | IM16 <sup>s</sup> |             |             |             |
| 6 | 2.39520300  | 1.83883300  | 0.60651600  | 6 | -3.04235200 | -0.08687000 | -1.17648900 | 27                | -0.97669100 | -0.56934800 | -0.45048200 |
| 1 | 1.66605000  | 2.50489300  | 1.07160200  | 6 | -3.66053200 | -1.34212400 | -0.99216400 | 7                 | -0.34720300 | -0.75106900 | 1.33250600  |
| 6 | 2.79760600  | -0.12324300 | -0.55613200 | 6 | -3.83856200 | 1.06051700  | -0.99267300 | 7                 | 0.99533600  | -0.98313000 | -0.95750100 |
| 6 | 0.14964700  | -2.37898000 | -0.66782900 | 6 | -4.99256700 | -1.44350400 | -0.60559800 | 7                 | -0.97179700 | 1.38747700  | -0.34244000 |
| 6 | 0.41655300  | -2.45284600 | 0.83646100  | 6 | -4.99256700 | -1.44350400 | -0.60559800 | 6                 | 0.94159700  | -0.28766900 | 1.33126800  |
| 1 | -0.02885500 | -3.35150500 | 1.28603700  | 1 | -3.06382100 | -2.24479700 | -1.15754600 | 6                 | 1.58910300  | 0.32920000  | 2.40695600  |
| 1 | 1.50284100  | -2.49876600 | 1.00696700  | 6 | -5.17347000 | 0.95715400  | -0.60814500 | 1                 | 1.02688300  | 0.50833500  | 3.32656600  |
| 6 | -1.53419500 | -1.25346100 | 1.79568700  | 1 | -3.40639100 | 2.04762000  | -1.17578200 | 6                 | 2.94693500  | 0.68132900  | 2.32118500  |
| 1 | -2.12735400 | -0.99475200 | 0.90886900  | 6 | -5.75782400 | -0.29288900 | -0.40248000 | 1                 | 3.42352500  | 1.15426300  | 3.18413400  |
| 1 | -1.69360500 | -0.43202800 | 2.51261800  | 1 | -5.44272300 | -2.43071800 | -0.47082300 | 6                 | 3.69171400  | 0.44147100  | 1.18037300  |
| 6 | -2.07744300 | -2.55591300 | 2.34599100  | 1 | -5.76831800 | 1.86532900  | -0.47964200 | 1                 | 4.74529300  | 0.72451500  | 1.12564400  |
| 1 | -2.11888000 | -3.33450300 | 1.57130500  | 1 | -6.80598700 | -0.37037900 | -0.10434500 | 6                 | 3.07380100  | -0.14891900 | 0.05021000  |
| 1 | -3.11161900 | -2.39260200 | 2.67849500  | 6 | -0.73517400 | 2.15257300  | -0.82909600 | 6                 | 3.72985400  | -0.36220100 | -1.18999500 |
| 1 | -1.51289300 | -2.95412600 | 3.19993900  | 6 | -0.04001500 | 3.38108800  | -1.05718300 | 1                 | 4.78967300  | -0.11221700 | -1.28616200 |
| 6 | 0.75550100  | -0.69659300 | 2.51890400  | 6 | -1.18971900 | 1.88871100  | 0.50898100  | 6                 | 3.01769900  | -0.86388900 | -2.25878000 |
| 1 | 0.44767600  | 0.34344600  | 2.72083600  | 6 | 0.13996900  | 4.29739600  | -0.04830500 | 1                 | 3.49753400  | -1.03829200 | -3.22405600 |
| 1 | 1.78148000  | -0.63082200 | 2.12618800  | 1 | 0.30931400  | 3.59864400  | -2.06971600 | 6                 | 1.65078400  | -1.15650300 | -2.10260900 |
| 6 | 0.74578600  | -1.50905600 | 3.79644100  | 6 | -0.94651700 | 2.83482900  | 1.53162200  | 1                 | 1.06972600  | -1.55465600 | -2.94084600 |
|   |             |             |             | 1 | -1.95399600 | 1.13445200  | 0.69956100  | 6                 | 1.69526900  | -0.50256600 | 0.12280700  |

|   |             |             |             |                   |             |             |             |  |   |            |             |             |
|---|-------------|-------------|-------------|-------------------|-------------|-------------|-------------|--|---|------------|-------------|-------------|
| 6 | -1.52725500 | -0.01168200 | 1.46621000  |                   |             |             |             |  | 6 | 2.52800000 | -1.18393700 | -1.37876000 |
| 6 | -1.36559500 | 1.46229500  | 1.08666700  | IM17 <sup>s</sup> |             |             |             |  | 1 | 2.59426100 | -0.39600200 | -2.14424800 |
| 1 | -2.28712400 | 2.04147900  | 1.24354300  | 27                | 0.45746000  | 0.38030300  | -0.14989000 |  | 1 | 1.58929700 | -1.72066300 | -1.56789300 |
| 1 | -0.54815500 | 1.96310100  | 1.63159900  | 8                 | -0.31202200 | -1.36897000 | 2.20095800  |  | 6 | 3.69632900 | -2.14439000 | -1.48429600 |
| 6 | -2.02264600 | 1.04213400  | -1.30374000 | 7                 | -0.21839200 | -1.44296500 | -0.15900300 |  | 1 | 3.55316100 | -2.79111800 | -2.36047000 |
| 1 | -1.81706500 | -0.03012300 | -1.79510100 | 7                 | -1.38563000 | 0.90134900  | -0.06538200 |  | 1 | 3.77487400 | -2.80850200 | -0.61033600 |
| 1 | -1.83647500 | 1.63462900  | -2.22078000 | 7                 | 2.32643700  | -0.48491200 | -0.08713000 |  | 1 | 4.66411400 | -1.64539000 | -1.61562100 |
| 6 | -3.45928900 | 1.19440900  | -0.87091400 | 6                 | -1.61483000 | -1.43953100 | -0.15455200 |  | 6 | 3.41374100 | 0.43206300  | 0.31166900  |
| 1 | -3.67245400 | 0.63686300  | 0.05185100  | 6                 | -2.41605600 | -2.57003100 | -0.18610000 |  | 1 | 2.99856100 | 1.06002900  | 1.11205900  |
| 1 | -4.12037500 | 0.80848600  | -1.65730000 | 1                 | -1.94622500 | -3.55518100 | -0.19825400 |  | 1 | 3.58229200 | 1.11650000  | -0.53324800 |
| 1 | -3.71710100 | 2.25294000  | -0.71510700 | 6                 | -3.81954700 | -2.44050900 | -0.20631200 |  | 6 | 4.70547100 | -0.19909300 | 0.79624900  |
| 6 | 0.07443900  | 2.30860500  | -0.80217900 | 1                 | -4.43204300 | -3.34483000 | -0.23944200 |  | 1 | 5.32182800 | 0.56852500  | 1.28357700  |
| 1 | 0.41150300  | 1.95789700  | -1.79118500 | 6                 | -4.43614600 | -1.20374600 | -0.19231800 |  | 1 | 5.31489000 | -0.63583700 | -0.00208200 |
| 1 | 0.93634500  | 2.18386800  | -0.12669200 | 1                 | -5.52482800 | -1.11999700 | -0.21965400 |  | 1 | 4.52925900 | -0.98611900 | 1.54499100  |
| 6 | -0.37792500 | 3.75056800  | -0.84862100 | 6                 | -3.65283500 | -0.02486100 | -0.14797300 |  | 1 | 0.30628500 | 3.10377000  | -1.85334900 |
| 1 | -1.23075100 | 3.88851300  | -1.52998400 | 6                 | -4.16276300 | 1.29645100  | -0.12918100 |  | 5 | 1.12092700 | 2.25426900  | -1.50561800 |
| 1 | 0.43093100  | 4.40571900  | -1.19759500 | 1                 | -5.24286600 | 1.46029400  | -0.15968600 |  | 1 | 2.22636100 | 2.36897000  | -2.02882200 |
| 1 | -0.68422100 | 4.10792700  | 0.14495600  | 6                 | -3.28527700 | 2.35879100  | -0.07962600 |  | 1 | 0.64634700 | 1.11626700  | -1.82354800 |
| 8 | -2.60208300 | -0.50116500 | 1.90988000  | 1                 | -3.64632400 | 3.38826800  | -0.07108100 |  | 8 | 1.22515700 | 2.19752100  | 0.00405100  |
| 1 | -2.51083500 | -1.83348400 | 0.75977900  | 6                 | -1.89814900 | 2.12721400  | -0.04411000 |  | 6 | 1.26293500 | 3.35159600  | 0.76839100  |
| 8 | -2.16072700 | -2.17566400 | -0.11403400 | 1                 | -1.18627800 | 2.95332500  | -0.02389200 |  | 1 | 1.17204500 | 3.10197400  | 1.83788100  |
| 6 | -1.51546700 | -3.41706200 | 0.10310400  | 6                 | -2.23902300 | -0.16797300 | -0.12692800 |  | 1 | 2.21797000 | 3.89074100  | 0.62286700  |
| 1 | -1.04335600 | -3.72244500 | -0.83890600 | 6                 | 0.38789200  | -1.12985500 | 1.04046800  |  | 1 | 0.45467700 | 4.06376300  | 0.50953300  |
| 1 | -0.73879400 | -3.33104900 | 0.87809600  | 6                 | 1.87430100  | -1.36171500 | 1.02527400  |  | 1 | 0.14633100 | -0.93613800 | 2.93016300  |
| 1 | -2.24404200 | -4.18929300 | 0.39420100  | 1                 | 2.32840700  | -1.01846700 | 1.96747100  |  |   |            |             |             |
|   |             |             |             | 1                 | 2.17529900  | -2.41927000 | 0.88734000  |  |   |            |             |             |

|                  |             |             |             |                  |             |             |             |   |             |             |             |
|------------------|-------------|-------------|-------------|------------------|-------------|-------------|-------------|---|-------------|-------------|-------------|
| TS1 <sup>S</sup> |             |             |             | 1                | -2.15895500 | -1.98897600 | -0.51465300 | 6 | -2.22291000 | 2.95847400  | 0.45561900  |
| 27               | -0.00459200 | -1.54271500 | 0.76853400  | 1                | -3.00657100 | -1.31646700 | -1.93152300 | 1 | -2.18954900 | 4.03134800  | 0.66201300  |
| 7                | -0.21984900 | 0.38693500  | 0.54825500  | 6                | -4.26546600 | -1.65636200 | -0.19971200 | 6 | -3.44531500 | 2.33749900  | 0.28022900  |
| 1                | -1.12363300 | 0.02556200  | -0.35053700 | 1                | -4.16100300 | -1.81782300 | 0.88188800  | 1 | -4.37509900 | 2.90824600  | 0.34787300  |
| 7                | 1.66561600  | -1.26824800 | -0.01562900 | 1                | -4.61965400 | -2.60542400 | -0.62325000 | 6 | -3.51054100 | 0.94754700  | 0.01457700  |
| 7                | -2.42107000 | 0.06249500  | -0.49018100 | 1                | -5.05510300 | -0.90842400 | -0.35915300 | 6 | -4.71078700 | 0.21142900  | -0.17348600 |
| 6                | 1.02416000  | 0.98593200  | 0.26620600  | 6                | -2.69321400 | 1.12297800  | -1.47718800 | 1 | -5.67577500 | 0.71977200  | -0.12311100 |
| 6                | 1.30111800  | 2.34805900  | 0.25862500  | 1                | -2.22432000 | 0.81012200  | -2.42327700 | 6 | -4.62197000 | -1.15080500 | -0.41716200 |
| 1                | 0.54344300  | 3.06581800  | 0.57430000  | 1                | -2.13501800 | 2.01374700  | -1.14339200 | 1 | -5.52186900 | -1.75024200 | -0.57172800 |
| 6                | 2.57759400  | 2.78499400  | -0.13977500 | 6                | -4.15181500 | 1.45059900  | -1.69145800 | 6 | -3.37895700 | -1.78176400 | -0.47972600 |
| 1                | 2.79141400  | 3.85655200  | -0.13773600 | 1                | -4.70068700 | 0.60482300  | -2.12807100 | 1 | -3.30152800 | -2.85469500 | -0.68017400 |
| 6                | 3.56254600  | 1.89385200  | -0.52718600 | 1                | -4.25342400 | 2.29563300  | -2.38448900 | 6 | -2.28385500 | 0.23707400  | -0.06204100 |
| 1                | 4.54950300  | 2.25318700  | -0.82826200 | 1                | -4.65542000 | 1.73450500  | -0.75644600 | 6 | 1.29594400  | 0.39941900  | -0.07257500 |
| 6                | 3.31288200  | 0.49956900  | -0.51832700 | 1                | -1.32356600 | -1.87275800 | 1.55993900  | 6 | 2.38001400  | -0.57949000 | -0.48806000 |
| 6                | 4.26150100  | -0.49879500 | -0.86184800 | 8                | -1.01004100 | 1.85174300  | 2.19444800  | 1 | 2.18018100  | -1.59251800 | -0.10231400 |
| 1                | 5.26424200  | -0.21094100 | -1.18374800 |                  |             |             |             | 1 | 2.41557500  | -0.64706600 | -1.58525300 |
| 6                | 3.89006600  | -1.83043100 | -0.76316800 |                  |             |             |             | 6 | 4.05268300  | -0.55220500 | 1.30588000  |
| 1                | 4.59469000  | -2.62641000 | -1.01268300 | TS3 <sup>S</sup> |             |             |             | 1 | 4.91007800  | 0.04139400  | 1.65982600  |
| 6                | 2.60473800  | -2.18082100 | -0.34185600 | 27               | -0.51579200 | -1.81665300 | -0.05250800 | 1 | 4.43266700  | -1.56697300 | 1.09446100  |
| 1                | 2.30711300  | -3.23092000 | -0.26459600 | 8                | 1.77486800  | 1.55713000  | 0.19665700  | 6 | 2.95253300  | -0.58762100 | 2.33895100  |
| 6                | 2.02501100  | 0.06371300  | -0.10814800 | 7                | 0.04952900  | -0.00844400 | -0.03183200 | 1 | 2.59104700  | 0.42135600  | 2.58004400  |
| 6                | -1.17632900 | 1.01037100  | 1.34332400  | 7                | -2.21194900 | -1.12280500 | -0.30423400 | 1 | 3.33303300  | -1.03639500 | 3.26477500  |
| 6                | -2.56302700 | 0.52489300  | 0.90429700  | 7                | 3.61866600  | 0.05118000  | 0.02198800  | 1 | 2.08945300  | -1.19070800 | 2.01486500  |
| 1                | -2.88256200 | -0.29686700 | 1.55297700  | 6                | -1.03701100 | 0.88116700  | 0.11915700  | 6 | 4.71499000  | 0.17928900  | -0.95757900 |
| 1                | -3.28262800 | 1.35069100  | 1.00464300  | 6                | -1.00940900 | 2.24997900  | 0.37784500  | 1 | 4.95680400  | -0.82105300 | -1.35667100 |
| 6                | -2.94917200 | -1.27930900 | -0.83296000 | 1                | -0.06149500 | 2.76288400  | 0.51854100  | 1 | 5.60250000  | 0.51105100  | -0.39781000 |

|                  |             |             |             |   |             |             |             |                  |            |             |             |
|------------------|-------------|-------------|-------------|---|-------------|-------------|-------------|------------------|------------|-------------|-------------|
| 6                | 4.39526900  | 1.15786700  | -2.05970000 | 6 | -3.76086600 | -1.83619000 | -0.20265100 | 1                | 4.11156200 | 3.67732100  | 0.17449000  |
| 1                | 3.52072700  | 0.85656300  | -2.65202700 | 1 | -3.67875900 | -2.92707400 | -0.22326500 | 8                | 3.67594100 | 1.74991100  | -0.42093300 |
| 1                | 5.24193800  | 1.23596900  | -2.75249600 | 6 | -2.66604400 | 0.22535000  | -0.12979900 | 1                | 2.48665800 | 1.78510800  | -0.51077100 |
| 1                | 4.19274200  | 2.16120700  | -1.66128600 | 6 | 0.91200400  | 0.37635100  | -0.33955600 |                  |            |             |             |
| 1                | 0.76505800  | -2.59126400 | 0.48543400  | 6 | 1.89542100  | -0.73393700 | -0.63483800 |                  |            |             |             |
| 1                | 3.00316100  | 1.10703600  | 0.20646600  | 1 | 1.40952400  | -1.69907000 | -0.40171600 |                  |            |             |             |
|                  |             |             |             | 1 | 2.10147200  | -0.68560100 | -1.71479900 | TS5 <sup>S</sup> |            |             |             |
|                  |             |             |             | 6 | 3.11940600  | -1.00768700 | 1.50092700  | 27               | 0.16920800 | 0.49187300  | 0.14024900  |
|                  |             |             |             | 1 | 4.12509000  | -0.82751800 | 1.91543700  | 7                | 1.59982100 | -1.01198000 | -0.38777400 |
| TS4 <sup>S</sup> |             |             |             | 1 | 2.93409800  | -2.09448400 | 1.56368500  | 7                | 1.80210100 | 1.52837600  | 0.38148600  |
| 27               | -0.90733300 | -1.78593200 | 0.26823000  | 6 | 2.06395400  | -0.26398200 | 2.27738600  | 7                | 0.45474700 | -2.69627700 | 0.96167100  |
| 8                | 1.28365900  | 1.60117300  | -0.43738400 | 1 | 2.10932400  | 0.82191900  | 2.11280900  | 6                | 2.84415200 | -0.39757100 | -0.54668100 |
| 7                | -0.32794900 | -0.01033400 | -0.09480100 | 1 | 2.20612000  | -0.44607700 | 3.35009600  | 6                | 3.97160700 | -1.00792400 | -1.08617700 |
| 7                | -2.59794600 | -1.15316600 | -0.14252500 | 1 | 1.06025600  | -0.62845400 | 2.01342100  | 1                | 3.89546900 | -2.01765000 | -1.49172100 |
| 7                | 3.20575300  | -0.63977400 | 0.06311600  | 6 | 4.22366900  | -1.48887500 | -0.60128600 | 6                | 5.20133900 | -0.32676300 | -1.11968600 |
| 6                | -1.41555200 | 0.89221500  | -0.07125000 | 1 | 3.85231000  | -2.52898700 | -0.62288600 | 1                | 6.06950300 | -0.83005700 | -1.55225700 |
| 6                | -1.40185000 | 2.28632900  | -0.01547700 | 1 | 5.10102000  | -1.48875300 | 0.06343100  | 6                | 5.33518600 | 0.95002200  | -0.61043100 |
| 1                | -0.46183800 | 2.82571800  | 0.03903500  | 6 | 4.62058800  | -1.01234700 | -1.97794600 | 1                | 6.29872300 | 1.46446300  | -0.62818100 |
| 6                | -2.61941100 | 2.99218500  | -0.02860400 | 1 | 3.82822600  | -1.15151500 | -2.72491100 | 6                | 4.21034400 | 1.61219700  | -0.06352800 |
| 1                | -2.58910100 | 4.08358500  | 0.02102300  | 1 | 5.48831400  | -1.58399900 | -2.32994800 | 6                | 4.24256500 | 2.91814900  | 0.48606000  |
| 6                | -3.83929500 | 2.34831600  | -0.10381800 | 1 | 4.89424900  | 0.05127800  | -1.97100000 | 1                | 5.18652000 | 3.46819300  | 0.51123200  |
| 1                | -4.77226300 | 2.91741400  | -0.11391200 | 1 | 0.35308800  | -2.46133900 | 0.96131900  | 6                | 3.08099600 | 3.47060700  | 0.98378800  |
| 6                | -3.89544600 | 0.93457700  | -0.15655400 | 1 | 3.58317200  | 0.56621400  | -0.07723200 | 1                | 3.07453700 | 4.46866400  | 1.42549700  |
| 6                | -5.09411100 | 0.17619700  | -0.21825300 | 6 | 4.17057800  | 2.64171900  | 0.54218500  | 6                | 1.87859000 | 2.74881700  | 0.90961700  |
| 1                | -6.05917100 | 0.68607000  | -0.24401500 | 1 | 5.22968800  | 2.42938600  | 0.75648800  | 1                | 0.94121700 | 3.16984200  | 1.28207800  |
| 6                | -5.00645900 | -1.20678600 | -0.24023300 | 1 | 3.61550900  | 2.59661900  | 1.49725300  | 6                | 2.95399100 | 0.93733900  | -0.06497400 |
| 1                | -5.90588600 | -1.82395800 | -0.29165100 |   |             |             |             | 6                | 1.19355000 | -2.02818000 | -1.22840200 |



|   |             |             |             |                  |             |             |             |   |             |             |             |
|---|-------------|-------------|-------------|------------------|-------------|-------------|-------------|---|-------------|-------------|-------------|
| 6 | 0.20289500  | -2.91554700 | -0.47244000 | 6                | -4.77130000 | -2.57819800 | -1.07451600 | 6 | -0.58613000 | -4.16286400 | 0.57710100  |
| 1 | -0.82663500 | -2.62447800 | -0.72064900 | 6                | -2.00219000 | 2.77564900  | 0.05516300  | 1 | 0.43612300  | -4.50610300 | 0.71792500  |
| 1 | 0.33460800  | -3.96285300 | -0.78178300 | 6                | -3.35004400 | 2.92364000  | 0.43983900  | 6 | -1.65847600 | -5.06661200 | 0.70268600  |
| 6 | -0.74724200 | -2.58201700 | 1.82180200  | 6                | -1.28536900 | 3.93806900  | -0.28826400 | 1 | -1.43858600 | -6.10872700 | 0.94745700  |
| 1 | -1.13726200 | -1.56479600 | 1.65769600  | 6                | -3.94561500 | 4.18014100  | 0.48964900  | 6 | -2.96746100 | -4.67064900 | 0.52146200  |
| 1 | -0.38858200 | -2.61160100 | 2.86214400  | 6                | -1.88479500 | 5.19216600  | -0.24756900 | 1 | -3.78990900 | -5.38359000 | 0.61635400  |
| 6 | -1.83509900 | -3.60414300 | 1.58126600  | 6                | -3.21709800 | 5.32050500  | 0.14865300  | 6 | -3.25828300 | -3.32170100 | 0.20549700  |
| 1 | -2.27818000 | -3.50507700 | 0.57958800  | 1                | -3.76354200 | -0.27541600 | 1.23074900  | 6 | -4.56693100 | -2.82480200 | -0.01296800 |
| 1 | -2.65373000 | -3.43553200 | 2.29351300  | 1                | -1.89673400 | -1.39844000 | -2.48504800 | 1 | -5.41985300 | -3.50335500 | 0.06523300  |
| 1 | -1.49906800 | -4.64241700 | 1.70492000  | 1                | -5.58609700 | -1.90612500 | 0.81068700  | 6 | -4.73813600 | -1.49347100 | -0.32978600 |
| 6 | 1.54318100  | -3.54379400 | 1.49262400  | 1                | -3.72166400 | -3.02455100 | -2.90937300 | 1 | -5.73061100 | -1.07987400 | -0.51696500 |
| 1 | 1.89346800  | -3.06618100 | 2.42113400  | 1                | -5.57087900 | -3.29949700 | -1.25834500 | 6 | -3.61919500 | -0.65005400 | -0.41615600 |
| 1 | 2.37684800  | -3.45714100 | 0.77629700  | 1                | -3.92789900 | 2.03304600  | 0.69885100  | 1 | -3.72650000 | 0.40702400  | -0.67314300 |
| 6 | 1.20222900  | -4.99334000 | 1.74002400  | 1                | -0.24611900 | 3.83514400  | -0.61292100 | 6 | -2.17884700 | -2.39937100 | 0.09309500  |
| 1 | 0.48566200  | -5.11500400 | 2.56318900  | 1                | -4.99187100 | 4.27141600  | 0.79299700  | 6 | 1.39690400  | -2.00388300 | 0.08077000  |
| 1 | 2.10810800  | -5.54793100 | 2.01682200  | 1                | -1.31019200 | 6.07841200  | -0.52896300 | 6 | 2.28099900  | -0.80237700 | -0.18341600 |
| 1 | 0.78303900  | -5.48193900 | 0.84890900  | 1                | -3.68768800 | 6.30587900  | 0.18744600  | 1 | 1.94031100  | -0.23865400 | -1.06301000 |
| 1 | 0.19092700  | 0.20303400  | 1.57869300  | 1                | 1.05659000  | -1.58268500 | 0.69330100  | 1 | 2.23859400  | -0.09635400 | 0.65516100  |
| 8 | 1.53917300  | -2.25667300 | -2.36851600 |                  |             |             |             | 6 | 4.11450100  | -1.35270100 | -1.73340200 |
| 6 | -1.61683100 | 0.20099900  | -0.29836900 |                  |             |             |             | 1 | 5.12736100  | -1.78351900 | -1.72924100 |
| 6 | -1.36956800 | 1.47350500  | -0.00474300 | TS7 <sup>s</sup> |             |             |             | 1 | 4.21917100  | -0.29972700 | -2.05011900 |
| 6 | -2.70016900 | -0.71014200 | -0.59955900 | 8                | 2.07273000  | -3.08126900 | 0.23712000  | 6 | 3.21400300  | -2.12279600 | -2.66774800 |
| 6 | -3.76194100 | -0.87516900 | 0.31539800  | 7                | 0.10555400  | -1.80171500 | 0.10245200  | 1 | 3.12289100  | -3.17586500 | -2.37007400 |
| 6 | -2.70936900 | -1.51074100 | -1.76043300 | 7                | -2.37469200 | -1.07517800 | -0.19997000 | 1 | 3.62354200  | -2.09556800 | -3.68481800 |
| 6 | -4.77796600 | -1.79671800 | 0.08219300  | 7                | 3.63844700  | -1.36743900 | -0.33183000 | 1 | 2.20007400  | -1.70155400 | -2.71791900 |
| 6 | -3.73399200 | -2.42435400 | -1.99576600 | 6                | -0.82714000 | -2.82484500 | 0.27072400  | 6 | 4.63203200  | -0.79951000 | 0.60647300  |

|    |             |             |             |                  |             |             |             |    |             |             |             |
|----|-------------|-------------|-------------|------------------|-------------|-------------|-------------|----|-------------|-------------|-------------|
| 1  | 4.71362300  | 0.28523400  | 0.41543700  | 1                | 3.63523300  | 3.27186500  | 2.69155100  | 6  | -3.10197300 | -2.13789800 | -0.60031800 |
| 1  | 5.60359500  | -1.24397000 | 0.34244600  | 1                | 5.08931400  | 3.73092000  | 0.71554400  | 1  | -3.62804600 | -1.24053200 | -0.93682000 |
| 6  | 4.30098300  | -1.07780400 | 2.05123600  | 1                | -0.66936800 | 4.21141200  | -1.22167200 | 6  | -1.11023300 | -3.05635700 | 0.17329600  |
| 1  | 3.36494200  | -0.59830700 | 2.36782700  | 1                | -3.51479700 | 1.98829000  | 1.11875000  | 6  | 1.95987500  | -1.16865300 | 0.32212800  |
| 1  | 5.09362500  | -0.68042100 | 2.69699400  | 1                | -2.21409000 | 6.15727900  | -1.25443600 | 6  | 2.18661400  | 0.31747300  | 0.14024600  |
| 1  | 4.21365000  | -2.15493300 | 2.25003600  | 1                | -5.05338900 | 3.93918800  | 1.10840900  | 1  | 1.27520500  | 0.73472900  | -0.31360300 |
| 1  | 3.19994800  | -2.49494300 | -0.01021800 | 1                | -4.41409100 | 6.02928000  | -0.09009000 | 1  | 2.26292000  | 0.76537900  | 1.14298200  |
| 27 | -0.76271000 | 0.01922000  | -0.22752700 |                  |             |             |             | 6  | 3.09939000  | 0.66076600  | -2.10076400 |
| 1  | -0.58376100 | -0.19475200 | -1.66752600 |                  |             |             |             | 1  | 4.05021500  | 0.89397100  | -2.60771700 |
| 6  | 0.21755400  | 1.57480600  | 0.04361800  | TS8 <sup>S</sup> |             |             |             | 1  | 2.39550200  | 1.47414600  | -2.35712200 |
| 6  | -1.08889200 | 1.81963000  | -0.05129600 | 8                | 2.94658400  | -1.96669100 | 0.50767700  | 6  | 2.54936400  | -0.66714400 | -2.55804300 |
| 6  | 1.49447000  | 2.22746700  | 0.22873700  | 7                | 0.68895500  | -1.51673600 | 0.31910600  | 1  | 3.16733100  | -1.51101700 | -2.22043900 |
| 6  | 2.33159200  | 2.49845700  | -0.87504200 | 7                | -1.83365300 | -1.96629600 | -0.22920600 | 1  | 2.51762700  | -0.69468600 | -3.65434700 |
| 6  | 1.99815100  | 2.51873000  | 1.51333100  | 7                | 3.37234600  | 0.73643800  | -0.64405600 | 1  | 1.52133800  | -0.82914500 | -2.20124300 |
| 6  | 3.60534800  | 3.03296700  | -0.70066600 | 6                | 0.26701800  | -2.83821000 | 0.49773000  | 6  | 3.76577500  | 2.12317300  | -0.28209900 |
| 6  | 3.27462700  | 3.05105900  | 1.68296100  | 6                | 1.00955700  | -3.93122700 | 0.94801800  | 1  | 2.87117300  | 2.76969200  | -0.34879800 |
| 6  | 4.09073800  | 3.30910300  | 0.58001200  | 1                | 2.05327700  | -3.80093600 | 1.21529700  | 1  | 4.45985800  | 2.46313400  | -1.06597600 |
| 6  | -1.98656900 | 2.95750100  | -0.05767100 | 6                | 0.42019000  | -5.20470600 | 1.05977700  | 6  | 4.41880500  | 2.23149100  | 1.07332900  |
| 6  | -1.63721400 | 4.15342800  | -0.71624100 | 1                | 1.03408600  | -6.03284600 | 1.42258200  | 1  | 3.73476900  | 1.96932600  | 1.89231800  |
| 6  | -3.23580200 | 2.90428100  | 0.58988900  | 6                | -0.89542400 | -5.43011200 | 0.71652400  | 1  | 4.72772700  | 3.26987700  | 1.24827600  |
| 6  | -2.50428300 | 5.24153800  | -0.73257800 | 1                | -1.33819100 | -6.42586800 | 0.79485100  | 1  | 5.30589700  | 1.58878900  | 1.15418000  |
| 6  | -4.09442900 | 3.99973700  | 0.58702400  | 6                | -1.69234500 | -4.35482100 | 0.25776500  | 27 | -0.91518000 | -0.26104700 | -0.10559300 |
| 6  | -3.73655400 | 5.17222200  | -0.08011900 | 6                | -3.04922300 | -4.49264600 | -0.12476200 | 1  | -0.56367700 | -0.29165600 | -1.53045800 |
| 1  | 1.95928700  | 2.27780600  | -1.88060000 | 1                | -3.52340400 | -5.47574600 | -0.07226700 | 6  | -0.83430700 | 1.56941500  | 0.25100200  |
| 1  | 1.36788600  | 2.31600600  | 2.38363200  | 6                | -3.74382900 | -3.38509600 | -0.56283300 | 6  | -2.07558200 | 1.15860100  | 0.00513100  |
| 1  | 4.22659400  | 3.24253700  | -1.57638400 | 1                | -4.78637100 | -3.45722000 | -0.87733100 | 6  | -0.04771800 | 2.75720400  | 0.49942600  |

|   |             |             |             |                  |             |             |             |   |             |             |             |
|---|-------------|-------------|-------------|------------------|-------------|-------------|-------------|---|-------------|-------------|-------------|
| 6 | 0.12686100  | 3.73187100  | -0.50667800 | 8                | 5.06297400  | -0.89455000 | 0.16196300  | 6 | -0.39170900 | -2.47418000 | 0.70932600  |
| 6 | 0.64166800  | 2.94997900  | 1.71505300  | 1                | 4.06821300  | -1.50609700 | 0.40996600  | 1 | -0.83904500 | -2.53432500 | -0.29776400 |
| 6 | 0.93832000  | 4.84492800  | -0.30049600 |                  |             |             |             | 1 | -0.12318500 | -3.52302900 | 0.99358600  |
| 6 | 1.43938600  | 4.07198000  | 1.92360400  |                  |             |             |             | 6 | -2.71354600 | -2.37513500 | 1.38794200  |
| 6 | 1.59843000  | 5.02627900  | 0.91671900  | TS9 <sup>S</sup> |             |             |             | 1 | -2.92125500 | -2.36601100 | 0.30419300  |
| 6 | -3.43062400 | 1.66410600  | -0.07923700 | 27               | 0.47258600  | 0.31928600  | -0.25320400 | 1 | -3.41268400 | -1.63902900 | 1.82184200  |
| 6 | -3.72747600 | 2.85405500  | -0.77307100 | 7                | 1.37760200  | -1.46554600 | -0.73903700 | 6 | -3.02907000 | -3.75873100 | 1.94060800  |
| 6 | -4.49859800 | 0.97365400  | 0.52684800  | 1                | 0.91739300  | -2.04057200 | -1.44017800 | 1 | -2.31226300 | -4.51607300 | 1.58794600  |
| 6 | -5.03398800 | 3.32531000  | -0.86160600 | 7                | 2.30868700  | 0.87388100  | -0.00718100 | 1 | -4.02892400 | -4.08510800 | 1.61994400  |
| 6 | -5.80181300 | 1.45542600  | 0.45142800  | 7                | -1.36876800 | -1.86522400 | 1.57082800  | 1 | -3.02018900 | -3.78138400 | 3.03940800  |
| 6 | -6.07815900 | 2.63073900  | -0.24911300 | 6                | 2.76595100  | -1.25523000 | -0.94471100 | 6 | -0.95970200 | -1.56411600 | 2.93393400  |
| 1 | -0.38376200 | 3.59528000  | -1.46430700 | 6                | 3.63100000  | -2.17326500 | -1.50628000 | 1 | -1.85042600 | -1.15931600 | 3.44195100  |
| 1 | 0.52440000  | 2.20437000  | 2.50731600  | 1                | 3.25499100  | -3.13885500 | -1.85188800 | 1 | -0.23299500 | -0.73430500 | 2.90405900  |
| 1 | 1.05075100  | 5.58491900  | -1.09766600 | 6                | 5.00100500  | -1.85991500 | -1.61842900 | 6 | -0.35783600 | -2.69982300 | 3.74792300  |
| 1 | 1.94613000  | 4.20288000  | 2.88410200  | 1                | 5.67750700  | -2.58718400 | -2.07195200 | 1 | -0.09333800 | -2.34696600 | 4.75488500  |
| 1 | 2.22582400  | 5.90557200  | 1.08067800  | 6                | 5.49638000  | -0.66042500 | -1.14892700 | 1 | 0.57153700  | -3.06265500 | 3.28834400  |
| 1 | -2.91185400 | 3.40517500  | -1.24773700 | 1                | 6.56121900  | -0.43037700 | -1.23021500 | 1 | -1.03893200 | -3.55371100 | 3.86731200  |
| 1 | -4.28260800 | 0.05461200  | 1.07941800  | 6                | 4.63145900  | 0.29964400  | -0.56713400 | 1 | 0.16284000  | 0.78131700  | 1.09521500  |
| 1 | -5.24004300 | 4.24894600  | -1.40886400 | 6                | 5.04297100  | 1.56593500  | -0.08311700 | 6 | -1.27310500 | 0.37531100  | -0.92188100 |
| 1 | -6.61142500 | 0.90895400  | 0.94228500  | 1                | 6.09887800  | 1.84283800  | -0.11787200 | 6 | -0.92861700 | 1.49544300  | -0.30771400 |
| 1 | -7.10246700 | 3.00494500  | -0.31550100 | 6                | 4.09134800  | 2.43013500  | 0.42017700  | 6 | -2.41633900 | -0.30266700 | -1.48366500 |
| 1 | 4.35486400  | -0.03912200 | -0.33049300 | 1                | 4.37051600  | 3.41372900  | 0.80127500  | 6 | -2.26400900 | -1.39259500 | -2.36294000 |
| 6 | 5.92251800  | -1.56468600 | -0.72139900 | 6                | 2.73916600  | 2.05515200  | 0.43987500  | 6 | -3.72838300 | 0.07906400  | -1.13282500 |
| 1 | 6.72144400  | -0.89019500 | -1.06630400 | 1                | 1.97070000  | 2.73482000  | 0.81596100  | 6 | -3.36735500 | -2.07588700 | -2.86520900 |
| 1 | 5.40325300  | -1.96010000 | -1.61382300 | 6                | 3.24590000  | -0.00843200 | -0.48599900 | 6 | -4.83016300 | -0.61129600 | -1.62541200 |
| 1 | 6.40503500  | -2.41453600 | -0.21606900 | 6                | 0.94245800  | -1.74897600 | 0.64203400  | 6 | -4.65675500 | -1.69267600 | -2.49287500 |

|                   |             |             |             |   |             |             |             |   |             |             |             |
|-------------------|-------------|-------------|-------------|---|-------------|-------------|-------------|---|-------------|-------------|-------------|
| 6                 | -1.35103100 | 2.81563600  | 0.09787400  | 6 | -2.86420100 | -0.33336900 | 2.38816700  | 1 | 1.71570200  | -3.19845500 | -1.84032000 |
| 6                 | -0.85257500 | 3.42280200  | 1.26533600  | 1 | -2.58343300 | -0.23305900 | 3.43811200  | 1 | 0.17075900  | -3.21793300 | -0.99774700 |
| 6                 | -2.27021800 | 3.54051100  | -0.68801300 | 6 | -4.18556100 | -0.07804500 | 1.96950000  | 6 | 1.49613900  | -4.74050200 | -0.32168900 |
| 6                 | -1.26233000 | 4.69862500  | 1.63928200  | 1 | -4.92522400 | 0.26008600  | 2.69793400  | 1 | 1.16731100  | -5.46750200 | -1.07674500 |
| 6                 | -2.66542400 | 4.82171600  | -0.31875800 | 6 | -4.54869900 | -0.28586800 | 0.65891800  | 1 | 0.89601900  | -4.92900300 | 0.57817700  |
| 6                 | -2.16631100 | 5.40726600  | 0.84675800  | 1 | -5.57928700 | -0.12335000 | 0.33337300  | 1 | 2.54685600  | -4.96095900 | -0.09554200 |
| 1                 | -1.25315100 | -1.68892500 | -2.66026600 | 6 | -3.59533100 | -0.71442100 | -0.29907700 | 1 | 1.69247100  | 0.18131100  | -1.32456000 |
| 1                 | -3.86471800 | 0.91730000  | -0.44400600 | 6 | -3.92372300 | -0.96086400 | -1.65302000 | 6 | 1.43434600  | 1.19514400  | -0.30653500 |
| 1                 | -3.22328500 | -2.91479600 | -3.55071800 | 1 | -4.95704100 | -0.84011500 | -1.98718200 | 6 | 0.10493500  | 1.34339700  | -0.32773500 |
| 1                 | -5.83723800 | -0.30576100 | -1.33022200 | 6 | -2.92935100 | -1.36173000 | -2.52184900 | 6 | 2.65374700  | 1.96370400  | -0.14236500 |
| 1                 | -5.52412700 | -2.23227500 | -2.87991400 | 1 | -3.14487100 | -1.58670700 | -3.56768300 | 6 | 3.85214300  | 1.59260300  | -0.78496800 |
| 1                 | -0.15461400 | 2.85689200  | 1.89001800  | 6 | -1.60814100 | -1.44782600 | -2.06219600 | 6 | 2.67923800  | 3.11313400  | 0.67413500  |
| 1                 | -2.66091600 | 3.08337000  | -1.60114400 | 1 | -0.79956300 | -1.71178700 | -2.75038600 | 6 | 5.01882500  | 2.32925000  | -0.61711700 |
| 1                 | -0.87334800 | 5.14559200  | 2.55756900  | 6 | -2.23762500 | -0.89127900 | 0.10384400  | 6 | 3.84852000  | 3.84541400  | 0.84395500  |
| 1                 | -3.37337300 | 5.37020800  | -0.94517300 | 6 | -0.07272500 | -2.29327200 | 1.60267200  | 6 | 5.02723400  | 3.45904300  | 0.20262300  |
| 1                 | -2.48293300 | 6.41169600  | 1.13670800  | 6 | 1.43203900  | -2.34005200 | 1.41247800  | 6 | -1.00112300 | 2.26393900  | -0.31000300 |
| 8                 | 1.74174000  | -1.68287100 | 1.55778000  | 1 | 1.93452300  | -1.51256300 | 1.93674500  | 6 | -2.02331100 | 2.13696700  | -1.27604500 |
|                   |             |             |             | 1 | 1.81589100  | -3.28669100 | 1.83178700  | 6 | -1.15541700 | 3.26684800  | 0.67209500  |
|                   |             |             |             | 6 | 3.14553700  | -1.85559900 | -0.24768600 | 6 | -3.12596700 | 2.98122300  | -1.27647100 |
|                   |             |             |             | 1 | 3.31998600  | -0.91253700 | 0.29420500  | 6 | -2.26833900 | 4.10272100  | 0.67490300  |
| TS10 <sup>s</sup> |             |             |             | 1 | 3.24215900  | -1.60604900 | -1.31568000 | 6 | -3.25914500 | 3.97021500  | -0.29942200 |
| 27                | 0.57993700  | -0.44325900 | -0.51500500 | 6 | 4.19336700  | -2.87583200 | 0.14582400  | 1 | 3.84484200  | 0.72143300  | -1.44673600 |
| 7                 | -0.58377200 | -1.04567100 | 1.89589800  | 1 | 4.07580400  | -3.23002300 | 1.18020000  | 1 | 1.76201400  | 3.42138700  | 1.18118600  |
| 1                 | 0.07887300  | -0.26906700 | 1.87602900  | 1 | 5.18817000  | -2.41452000 | 0.07967200  | 1 | 5.93124400  | 2.02377200  | -1.13598100 |
| 7                 | -1.24215100 | -1.17400900 | -0.80424500 | 1 | 4.20569100  | -3.75306100 | -0.51439200 | 1 | 3.84092800  | 4.73080600  | 1.48482000  |
| 7                 | 1.72102900  | -2.19398500 | -0.02767900 | 6 | 1.25296800  | -3.34041000 | -0.85038500 | 1 | 5.94430500  | 4.03688200  | 0.33782800  |
| 6                 | -1.90844700 | -0.74066900 | 1.48208400  |   |             |             |             |   |             |             |             |

|                   |             |             |             |    |             |             |             |                   |             |             |             |
|-------------------|-------------|-------------|-------------|----|-------------|-------------|-------------|-------------------|-------------|-------------|-------------|
| 1                 | -1.92431300 | 1.36306600  | -2.04267200 | 1  | 1.21541800  | -0.24832400 | -3.28190700 | 6                 | -0.69217400 | 1.49222700  | -1.72910600 |
| 1                 | -0.39724300 | 3.37085700  | 1.45306800  | 6  | 1.36393100  | -2.15798900 | -0.59862900 | 6                 | -1.64467300 | 3.80586300  | -0.38937700 |
| 1                 | -3.89506900 | 2.86261000  | -2.04505900 | 6  | 1.81510100  | -0.04612500 | 2.17578500  | 1                 | -2.38325700 | 2.48441300  | 1.13772900  |
| 1                 | -2.36435000 | 4.86790400  | 1.44977700  | 6  | 1.78591300  | 1.45682600  | 1.94795800  | 6                 | -0.50997400 | 2.79743200  | -2.28313600 |
| 1                 | -4.12983000 | 4.62993000  | -0.29423500 | 1  | 0.78819100  | 1.86254000  | 2.18992800  | 1                 | -0.75195900 | 0.65372500  | -2.43198100 |
| 8                 | -0.77362000 | -3.27202400 | 1.44143900  | 1  | 2.51599500  | 1.92893900  | 2.62795800  | 6                 | -0.95802800 | 3.92047600  | -1.63310500 |
|                   |             |             |             | 6  | 1.82826600  | 3.13065400  | 0.15817800  | 1                 | -2.02959900 | 4.70628300  | 0.09664000  |
|                   |             |             |             | 1  | 0.79239100  | 3.36643200  | 0.44596700  | 1                 | -0.05047200 | 2.89268100  | -3.27214500 |
|                   |             |             |             | 1  | 1.84626000  | 3.17946900  | -0.94098100 | 1                 | -0.82689300 | 4.90649500  | -2.08586500 |
| TS11 <sup>s</sup> |             |             |             | 6  | 2.76976600  | 4.16871800  | 0.73646700  | 6                 | -3.74888000 | -0.74295300 | 0.54323300  |
| 7                 | 1.01851100  | -0.68674800 | 1.24047800  | 1  | 2.85572900  | 4.10162200  | 1.83075800  | 6                 | -4.50856400 | -1.74347600 | 1.18430300  |
| 1                 | -0.20191000 | -0.23915900 | 1.02229900  | 1  | 2.38922100  | 5.17341500  | 0.50699400  | 6                 | -4.45506600 | 0.29769600  | -0.09620600 |
| 7                 | 1.20848200  | -1.03108500 | -1.37123500 | 1  | 3.78127600  | 4.10841200  | 0.31286200  | 6                 | -5.89865200 | -1.70470500 | 1.19605500  |
| 7                 | 2.04057200  | 1.72250200  | 0.52150000  | 6  | 3.33387700  | 1.15972300  | 0.06655700  | 1                 | -3.98317400 | -2.56456800 | 1.68093700  |
| 6                 | 1.27661300  | -2.00033800 | 0.81420800  | 1  | 3.49882600  | 1.55290600  | -0.94906600 | 6                 | -5.84449500 | 0.33257500  | -0.08513600 |
| 6                 | 1.48267500  | -3.08860500 | 1.64893900  | 1  | 3.19044700  | 0.07393200  | -0.06151500 | 1                 | -3.90413900 | 1.08193300  | -0.62019000 |
| 1                 | 1.44042600  | -2.94997400 | 2.72856000  | 6  | 4.54802500  | 1.38029300  | 0.95010900  | 6                 | -6.57863200 | -0.66387600 | 0.56289600  |
| 6                 | 1.75184200  | -4.35276500 | 1.09167200  | 1  | 4.77003100  | 2.43712300  | 1.14222700  | 1                 | -6.45754800 | -2.49493200 | 1.70394000  |
| 1                 | 1.90501400  | -5.20325600 | 1.75977900  | 1  | 5.43140600  | 0.94473100  | 0.46420200  | 1                 | -6.36468600 | 1.14897600  | -0.59293800 |
| 6                 | 1.81430700  | -4.53684800 | -0.27547400 | 1  | 4.44069300  | 0.87378800  | 1.91926300  | 1                 | -7.67040500 | -0.63021000 | 0.57016600  |
| 1                 | 2.00797400  | -5.52616400 | -0.69669100 | 27 | 0.39717800  | 0.47183500  | -0.26347700 | 8                 | 2.52981900  | -0.59995300 | 2.98561500  |
| 6                 | 1.62989700  | -3.44283500 | -1.15556300 | 6  | -2.29722200 | -0.84824100 | 0.55200800  |                   |             |             |             |
| 6                 | 1.69948800  | -3.53786500 | -2.56814100 | 6  | -1.38510000 | 0.04325100  | 0.08461800  |                   |             |             |             |
| 1                 | 1.88703800  | -4.50774700 | -3.03472000 | 1  | -1.91191900 | -1.77551700 | 0.99643400  | TS12 <sup>s</sup> |             |             |             |
| 6                 | 1.53957100  | -2.39736400 | -3.32776200 | 6  | -1.36852500 | 1.38596600  | -0.44899400 | 7                 | 2.48221400  | 0.24013400  | 0.87261900  |
| 1                 | 1.60340800  | -2.43174400 | -4.41684800 | 6  | -1.83783800 | 2.57837900  | 0.19381200  | 7                 | 1.19302400  | -1.30858100 | -0.83441800 |
| 6                 | 1.31203300  | -1.16589300 | -2.69250700 |    |             |             |             |                   |             |             |             |

|   |             |             |             |    |             |             |             |                   |             |             |             |
|---|-------------|-------------|-------------|----|-------------|-------------|-------------|-------------------|-------------|-------------|-------------|
| 7 | 0.85746900  | 2.47571600  | 0.05119400  | 1  | 0.33699200  | 5.31225500  | 0.10305900  | 6                 | -4.17484200 | -3.90583300 | 1.04814600  |
| 6 | 3.11296900  | -0.98287500 | 0.54166600  | 6  | 1.09751600  | 2.72952500  | -1.39371000 | 1                 | -2.11520600 | -3.56455900 | 1.57367400  |
| 6 | 4.34586600  | -1.38727200 | 1.01846400  | 1  | 0.10912900  | 2.91770000  | -1.83966500 | 6                 | -5.19021700 | -2.23581900 | -0.35739300 |
| 1 | 4.89989800  | -0.73551500 | 1.69557200  | 1  | 1.44716900  | 1.76331200  | -1.82915700 | 1                 | -3.95899600 | -0.58930900 | -0.95451400 |
| 6 | 4.87722200  | -2.62565500 | 0.61308800  | 6  | 2.09034500  | 3.80963700  | -1.76793900 | 6                 | -5.29030900 | -3.43230600 | 0.35520600  |
| 1 | 5.85148100  | -2.93890100 | 0.99359500  | 1  | 1.81747500  | 4.79314100  | -1.36274100 | 1                 | -4.23236100 | -4.84441400 | 1.60510600  |
| 6 | 4.18785200  | -3.43993700 | -0.26584400 | 1  | 2.12557500  | 3.90578800  | -2.86097500 | 1                 | -6.05152800 | -1.86277500 | -0.91742300 |
| 1 | 4.61019300  | -4.39618600 | -0.58351800 | 1  | 3.10597300  | 3.56353300  | -1.43043200 | 1                 | -6.22689200 | -3.99451900 | 0.36317100  |
| 6 | 2.93350700  | -3.04394200 | -0.78698500 | 27 | 0.70784400  | 0.41292800  | -0.25419000 | 8                 | 4.08127800  | 1.61110600  | -0.08693900 |
| 6 | 2.18129600  | -3.79779900 | -1.72413900 | 6  | -1.57457400 | -1.29558700 | 0.37012700  | 1                 | 1.73490800  | 0.25583500  | 1.66759800  |
| 1 | 2.56050700  | -4.76149500 | -2.07138100 | 6  | -1.17874400 | -0.01266600 | 0.03550200  | 6                 | -0.14453700 | -0.33389400 | 3.33845000  |
| 6 | 0.98386000  | -3.29215300 | -2.18417200 | 1  | -0.78088500 | -1.94347800 | 0.76570600  | 1                 | -0.18329900 | 0.12961600  | 4.34671800  |
| 1 | 0.37938100  | -3.84410500 | -2.90559700 | 6  | -2.19609600 | 1.00694300  | -0.30400800 | 1                 | -1.18283600 | -0.67537800 | 3.12201000  |
| 6 | 0.51229600  | -2.05601700 | -1.71442000 | 6  | -3.04688800 | 1.53336100  | 0.68293100  | 1                 | 0.45571900  | -1.26614700 | 3.45001200  |
| 1 | -0.44842700 | -1.65474300 | -2.04101300 | 6  | -2.30697000 | 1.50881100  | -1.61066700 | 8                 | 0.33464100  | 0.52460500  | 2.37375900  |
| 6 | 2.39658700  | -1.79407600 | -0.36718100 | 6  | -3.96617500 | 2.53268500  | 0.37473300  | 1                 | -0.35009900 | 0.26849400  | 1.08200500  |
| 6 | 3.02862200  | 1.46514600  | 0.50349300  | 1  | -2.96836200 | 1.14823700  | 1.70448000  |                   |             |             |             |
| 6 | 2.07618800  | 2.58469900  | 0.87454000  | 6  | -3.23952200 | 2.49554100  | -1.92510200 |                   |             |             |             |
| 1 | 1.75713500  | 2.46227800  | 1.92139200  | 1  | -1.64327200 | 1.10709000  | -2.38481300 | TS13 <sup>S</sup> |             |             |             |
| 1 | 2.58274000  | 3.55493500  | 0.76070400  | 6  | -4.06863400 | 3.01894500  | -0.93036600 | 7                 | -1.51308000 | -0.18453500 | -2.00161800 |
| 6 | -0.24212800 | 3.27140500  | 0.64682300  | 1  | -4.61470900 | 2.93393000  | 1.15802100  | 1                 | -0.55817500 | -0.52079700 | -1.86584600 |
| 1 | -0.54772900 | 2.71656600  | 1.54828900  | 1  | -3.31823200 | 2.86342100  | -2.95162700 | 7                 | -2.05439200 | 0.09679900  | 0.71206000  |
| 1 | -1.08243100 | 3.23568100  | -0.05578800 | 1  | -4.79255400 | 3.80059600  | -1.17207000 | 7                 | -0.11412100 | 2.31983100  | -0.55985900 |
| 6 | 0.07005000  | 4.71346800  | 0.98507200  | 6  | -2.86605200 | -1.96177100 | 0.33424400  | 6                 | -2.52822500 | -0.97492400 | -1.40839700 |
| 1 | 0.87602900  | 4.81846100  | 1.72454900  | 6  | -2.98670400 | -3.18675200 | 1.03016800  | 6                 | -3.25322400 | -1.88714500 | -2.14107900 |
| 1 | -0.82382200 | 5.17672300  | 1.42385300  | 6  | -4.00457700 | -1.50943000 | -0.37172200 | 1                 | -3.00789800 | -2.02272500 | -3.19581900 |

|   |             |             |             |    |             |             |             |                   |             |             |             |
|---|-------------|-------------|-------------|----|-------------|-------------|-------------|-------------------|-------------|-------------|-------------|
| 6 | -4.30560400 | -2.61523600 | -1.54587500 | 6  | -1.73985100 | 4.32321800  | -0.62733300 | 6                 | 5.52457200  | 0.29103500  | -0.18928000 |
| 1 | -4.85982700 | -3.34414900 | -2.14059200 | 1  | -1.01062800 | 5.07798300  | -0.94215500 | 6                 | 4.32627900  | -1.77880000 | 0.11427500  |
| 6 | -4.66208400 | -2.37428300 | -0.23965000 | 1  | -2.45923000 | 4.82850300  | 0.03172200  | 6                 | 6.68406600  | -0.41754600 | -0.48584400 |
| 1 | -5.50775100 | -2.89683900 | 0.21413300  | 1  | -2.30405300 | 3.99114200  | -1.50790300 | 1                 | 5.54230900  | 1.38496500  | -0.18482300 |
| 6 | -3.95571800 | -1.42164800 | 0.53933100  | 27 | -0.06976300 | 0.38811000  | 0.54844200  | 6                 | 5.48757100  | -2.48499300 | -0.17673600 |
| 6 | -4.32180500 | -1.09041300 | 1.86225000  | 8  | 0.45313400  | 1.56511600  | 2.30293500  | 1                 | 3.41784700  | -2.32435500 | 0.37734900  |
| 1 | -5.18098800 | -1.58610900 | 2.32091500  | 6  | 0.61194900  | 0.96809500  | 3.53870200  | 6                 | 6.67223500  | -1.81236800 | -0.48601600 |
| 6 | -3.59689400 | -0.13559200 | 2.54633400  | 1  | 1.46715400  | 0.25800600  | 3.58170900  | 1                 | 7.60602000  | 0.12292900  | -0.71431800 |
| 1 | -3.86519000 | 0.16936600  | 3.55852000  | 1  | 0.80375700  | 1.72105200  | 4.32764400  | 1                 | 5.47147700  | -3.57751900 | -0.15375300 |
| 6 | -2.46233700 | 0.42040700  | 1.93864300  | 1  | -0.28088000 | 0.38873900  | 3.87340400  | 1                 | 7.58167200  | -2.37269100 | -0.71432400 |
| 1 | -1.81705500 | 1.13154500  | 2.46797200  | 6  | 3.13379300  | 0.43484700  | 0.39515600  | 8                 | -2.81338900 | 1.67910900  | -1.98023000 |
| 6 | -2.82935600 | -0.75356800 | -0.03327800 | 6  | 1.83709800  | 0.03682300  | 0.48588600  |                   |             |             |             |
| 6 | -1.70601200 | 1.17808800  | -2.00669700 | 1  | 1.25596000  | 0.84607400  | 1.41318900  |                   |             |             |             |
| 6 | -0.43913800 | 2.00583400  | -1.96300600 | 1  | 3.35390300  | 1.48910900  | 0.60401200  | TS15 <sup>S</sup> |             |             |             |
| 1 | 0.41675200  | 1.45404900  | -2.38299200 | 6  | 1.13674000  | -1.18597800 | 0.17538400  | 27                | 0.80017200  | -0.75821600 | -0.14976600 |
| 1 | -0.59174800 | 2.91269700  | -2.57519800 | 6  | 0.21127800  | -1.57163900 | 1.21882500  | 7                 | 0.03331300  | 1.26302900  | 0.60679300  |
| 6 | 1.23383000  | 2.92636200  | -0.46502300 | 6  | 1.20115400  | -1.93139600 | -1.04169800 | 7                 | -1.05018100 | -1.12917200 | -0.15608600 |
| 1 | 1.91329200  | 2.23055800  | -0.97509900 | 6  | -0.66061800 | -2.67330100 | 0.94991400  | 7                 | 2.47579300  | 0.27219300  | -0.51713800 |
| 1 | 1.50278100  | 2.90617800  | 0.60213400  | 1  | 0.46089400  | -1.37307300 | 2.26967700  | 6                 | -1.34480500 | 1.22481400  | 0.37571700  |
| 6 | 1.44203300  | 4.32042900  | -1.02291700 | 6  | 0.33807700  | -2.98646600 | -1.24734300 | 6                 | -2.17488400 | 2.33305700  | 0.45427100  |
| 1 | 1.07500200  | 4.43424900  | -2.05337000 | 1  | 1.93905000  | -1.64844900 | -1.79985900 | 1                 | -1.72890600 | 3.30492000  | 0.66650200  |
| 1 | 2.51959300  | 4.53448200  | -1.04502300 | 6  | -0.60836600 | -3.34744500 | -0.24686400 | 6                 | -3.56253000 | 2.20147000  | 0.26911100  |
| 1 | 0.97887400  | 5.10152200  | -0.40682500 | 1  | -1.36467300 | -2.99733100 | 1.72362400  | 1                 | -4.19761400 | 3.08707900  | 0.34318300  |
| 6 | -1.14901300 | 3.14559700  | 0.12520700  | 1  | 0.37739000  | -3.55167400 | -2.18202700 | 6                 | -4.12655400 | 0.96994100  | 0.00743900  |
| 1 | -0.68886100 | 3.44722300  | 1.07781300  | 1  | -1.28647400 | -4.18528800 | -0.43014000 | 1                 | -5.20595200 | 0.86452500  | -0.12478800 |
| 1 | -1.97812600 | 2.47850700  | 0.39202600  | 6  | 4.31334100  | -0.36888200 | 0.10222400  | 6                 | -3.31208600 | -0.18082300 | -0.12007400 |

|   |             |             |             |                   |             |             |             |   |             |             |             |
|---|-------------|-------------|-------------|-------------------|-------------|-------------|-------------|---|-------------|-------------|-------------|
| 6 | -3.83387800 | -1.45998800 | -0.44153000 | 6                 | 0.27149600  | -1.38430000 | 2.73023900  | 6 | -1.35042300 | 1.76807400  | 1.48821700  |
| 1 | -4.91266500 | -1.58410400 | -0.56017300 | 1                 | 0.45991100  | -1.10849400 | 3.78595500  | 1 | -0.52568500 | 2.35851400  | 1.90029600  |
| 6 | -2.96790700 | -2.51878100 | -0.61048800 | 1                 | 0.51892400  | -2.45929000 | 2.63360700  | 6 | -2.02054800 | 0.01607600  | 0.12698500  |
| 1 | -3.33347200 | -3.51671600 | -0.85838600 | 1                 | -0.82452400 | -1.30085600 | 2.57190200  | 6 | 0.52658200  | -2.10851600 | -0.66054500 |
| 6 | -1.58890700 | -2.31416200 | -0.46560100 | 8                 | 1.01919100  | -0.60527800 | 1.86187500  | 6 | 1.97904000  | -1.67222000 | -0.61712600 |
| 1 | -0.88155300 | -3.13652100 | -0.60144700 | 1                 | 0.46141700  | 0.48721600  | 1.41562700  | 1 | 2.59832200  | -2.53498200 | -0.31778000 |
| 6 | -1.90023000 | -0.04989600 | 0.04473000  |                   |             |             |             | 1 | 2.31353000  | -1.33249700 | -1.61240700 |
| 6 | 0.90114300  | 2.10405700  | -0.03360300 |                   |             |             |             | 6 | 3.37412600  | 0.16229300  | 0.22615700  |
| 6 | 2.34320900  | 1.60424800  | 0.11201400  | TS16 <sup>S</sup> |             |             |             | 1 | 3.26252700  | 1.10268200  | 0.78558900  |
| 1 | 3.03296000  | 2.33441900  | -0.34425300 | 27                | 0.55984900  | 0.75224300  | -0.68728500 | 1 | 3.50510600  | 0.47090700  | -0.82176200 |
| 1 | 2.59395400  | 1.49365600  | 1.17709800  | 8                 | 0.09586000  | -3.14196900 | -0.21077000 | 6 | 4.59606400  | -0.59474400 | 0.70458000  |
| 6 | 2.09876100  | 0.27053700  | -1.95823400 | 7                 | -0.29083700 | -1.06496700 | -1.13157200 | 1 | 5.50076900  | -0.03276600 | 0.43537800  |
| 1 | 3.01039300  | 0.36074800  | -2.58383700 | 7                 | -1.00889400 | 0.81759700  | 0.60953400  | 1 | 4.68973900  | -1.58814600 | 0.24133900  |
| 1 | 1.49537200  | 1.16541800  | -2.16225300 | 7                 | 2.07035900  | -0.52247700 | 0.29478200  | 1 | 4.61903800  | -0.72709800 | 1.79460900  |
| 6 | 1.29249600  | -0.99713800 | -2.21316800 | 6                 | -1.67625300 | -0.99695500 | -0.80505500 | 6 | 1.62449600  | -0.85374300 | 1.66878500  |
| 1 | 1.84701900  | -1.71258100 | -2.84501800 | 6                 | -2.63107500 | -1.86281800 | -1.30792900 | 1 | 0.52296500  | -0.88988000 | 1.65677300  |
| 1 | 0.33194000  | -0.82469000 | -2.71556000 | 1                 | -2.33265200 | -2.65001300 | -2.00183200 | 1 | 1.87710500  | 0.02126400  | 2.28839800  |
| 1 | 1.24216100  | -1.78926400 | -1.28295600 | 6                 | -3.97190000 | -1.71711000 | -0.91194200 | 6 | 2.14094600  | -2.13803600 | 2.29000300  |
| 6 | 3.78981500  | -0.36178800 | -0.30502700 | 1                 | -4.72593100 | -2.39584500 | -1.31613000 | 1 | 1.76358900  | -2.21641000 | 3.31854800  |
| 1 | 4.56478300  | 0.23471200  | -0.82846500 | 6                 | -4.34358100 | -0.72342700 | -0.02660100 | 1 | 3.23481600  | -2.20095800 | 2.33937200  |
| 1 | 3.74659300  | -1.33156300 | -0.82693400 | 1                 | -5.39152200 | -0.60264400 | 0.25968100  | 1 | 1.77108400  | -3.02253300 | 1.75340500  |
| 6 | 4.14852100  | -0.57122500 | 1.14454700  | 6                 | -3.38394900 | 0.16413600  | 0.52046700  | 1 | 1.08546800  | 2.59779300  | -2.92830000 |
| 1 | 4.42717600  | 0.36617900  | 1.64538400  | 6                 | -3.69246800 | 1.20951500  | 1.42837400  | 5 | 1.54091300  | 1.83587000  | -2.10142500 |
| 1 | 5.01186500  | -1.24424700 | 1.22437100  | 1                 | -4.72648900 | 1.36407000  | 1.74462600  | 1 | 2.52898300  | 1.19423700  | -2.42818300 |
| 1 | 3.29950200  | -1.00371300 | 1.69079100  | 6                 | -2.66736500 | 2.00713800  | 1.90140400  | 1 | -0.22359700 | 1.41532400  | -1.77096000 |
| 8 | 0.60851500  | 3.07059400  | -0.71859000 | 1                 | -2.86294900 | 2.80651200  | 2.61909400  | 8 | 1.62489700  | 2.37461600  | -0.72586600 |



|                   |             |             |             |   |             |             |             |                   |             |             |             |
|-------------------|-------------|-------------|-------------|---|-------------|-------------|-------------|-------------------|-------------|-------------|-------------|
| 6                 | 0.99162000  | 3.60836500  | -0.46708700 | 1 | 3.31501200  | 1.35932700  | -0.96006100 | 6                 | 1.19446200  | 3.16265400  | 0.10595100  |
| 1                 | 0.91394600  | 3.75386000  | 0.61973900  | 6 | 2.69656200  | -1.79312200 | -0.20110200 | 6                 | 0.68778500  | 4.37603800  | -0.40608300 |
| 1                 | 1.59192200  | 4.43030900  | -0.88477700 | 6 | -0.82724800 | -2.47337400 | 0.12833200  | 6                 | 2.35390700  | 3.21925200  | 0.90538300  |
| 1                 | -0.01769600 | 3.64765900  | -0.90909100 | 6 | -2.04410900 | -1.69982300 | -0.35914100 | 6                 | 1.31994200  | 5.58512500  | -0.13671100 |
| 1                 | 0.07479900  | -0.53969000 | -1.97005200 | 1 | -1.87980000 | -0.62239500 | -0.37648200 | 1                 | -0.20899600 | 4.35023400  | -1.03146100 |
|                   |             |             |             | 1 | -2.31092700 | -2.02387600 | -1.37480800 | 6                 | 2.97506300  | 4.43181000  | 1.18565500  |
|                   |             |             |             | 6 | -3.31632100 | -0.98106800 | 1.62595600  | 1                 | 2.75136800  | 2.28567400  | 1.31402500  |
|                   |             |             |             | 1 | -4.09448800 | -1.34741300 | 2.31262700  | 6                 | 2.46537300  | 5.62106200  | 0.66148100  |
| TS17 <sup>s</sup> |             |             |             | 1 | -3.71767500 | -0.09266800 | 1.11076000  | 1                 | 0.91481000  | 6.51224100  | -0.55112300 |
| 27                | 0.62611700  | 0.07732400  | -0.50212800 | 6 | -4.44326400 | -2.37830100 | -0.08394300 | 1                 | 3.86830900  | 4.45081400  | 1.81559200  |
| 8                 | -1.09065100 | -3.52516100 | 0.75446100  | 1 | -4.71566200 | -1.51888000 | -0.71585000 | 1                 | 2.95898100  | 6.57268200  | 0.87317400  |
| 7                 | 0.33883100  | -1.91107200 | -0.17136000 | 1 | -5.19724600 | -2.43939400 | 0.71412700  | 6                 | -4.36927300 | -3.66942900 | -0.85594800 |
| 7                 | 2.47035600  | -0.46932600 | -0.49230100 | 1 | -0.36253600 | 0.17818100  | -1.61665000 | 6                 | -2.03060000 | -0.67645800 | 2.34877100  |
| 7                 | -3.15352000 | -2.03861500 | 0.57685000  | 6 | 0.55386100  | 1.89861100  | -0.17689400 | 1                 | -4.07492000 | -4.50930300 | -0.21203200 |
| 6                 | 1.53978400  | -2.59572600 | 0.01815800  | 6 | -0.65819000 | 1.41777200  | -0.46321800 | 1                 | -5.35151000 | -3.90288100 | -1.28382500 |
| 6                 | 1.71937400  | -3.94350100 | 0.33726500  | 6 | -2.05632000 | 1.78207100  | -0.50190900 | 1                 | -3.65442900 | -3.62420000 | -1.68731000 |
| 1                 | 0.85253100  | -4.57278400 | 0.52242400  | 6 | -2.59735300 | 2.60308100  | 0.51362900  | 1                 | -1.26149200 | -0.26271700 | 1.67581600  |
| 6                 | 3.01449700  | -4.48477400 | 0.41961000  | 6 | -2.94593400 | 1.28648200  | -1.47991600 | 1                 | -2.22271200 | 0.07827900  | 3.12119500  |
| 1                 | 3.12315200  | -5.54417400 | 0.66680000  | 6 | -3.95838000 | 2.88492900  | 0.56029900  | 1                 | -1.61554200 | -1.56844900 | 2.83856300  |
| 6                 | 4.14104800  | -3.71948600 | 0.19267100  | 1 | -1.92410600 | 3.00315900  | 1.27742600  | 1                 | -2.73632200 | -2.91008200 | 1.01124900  |
| 1                 | 5.14101700  | -4.15602000 | 0.25366600  | 6 | -4.30630100 | 1.57800900  | -1.43294200 |                   |             |             |             |
| 6                 | 4.00646500  | -2.34757000 | -0.12791800 | 1 | -2.53994300 | 0.66932400  | -2.28832200 |                   |             |             |             |
| 6                 | 5.09885500  | -1.48465400 | -0.39376900 | 6 | -4.82701800 | 2.36992300  | -0.40700700 | TS18 <sup>s</sup> |             |             |             |
| 1                 | 6.11823100  | -1.87590100 | -0.35174500 | 1 | -4.34896600 | 3.51922400  | 1.36083200  | 27                | 0.17911500  | 0.17576600  | -0.35473700 |
| 6                 | 4.84892300  | -0.16168700 | -0.70449000 | 1 | -4.96900200 | 1.19163900  | -2.21327500 | 7                 | 1.19791000  | 0.36428400  | 1.29737400  |
| 1                 | 5.66419400  | 0.53155200  | -0.92056600 | 1 | -5.89450200 | 2.59879100  | -0.37077300 | 7                 | 1.55938000  | -0.98012300 | -0.85047100 |
| 6                 | 3.53167100  | 0.31159300  | -0.73626200 |   |             |             |             |                   |             |             |             |

|   |             |             |             |   |             |             |             |                   |             |             |             |
|---|-------------|-------------|-------------|---|-------------|-------------|-------------|-------------------|-------------|-------------|-------------|
| 7 | -1.60246200 | 0.73563700  | 2.01823900  | 1 | -1.79647900 | -2.57391700 | 2.95474000  | 6                 | 1.67163600  | 2.99922400  | -3.05835800 |
| 1 | -1.45362000 | 0.44514300  | 0.77049600  | 1 | -1.21084000 | -1.95720600 | 1.39287700  | 1                 | 0.98068100  | 1.07968600  | -3.74969100 |
| 6 | 2.39442400  | -0.34608100 | 1.27060800  | 6 | -2.97096400 | 1.29350800  | 2.13416600  | 6                 | 0.49530600  | 3.94912900  | -1.18418100 |
| 6 | 3.40011000  | -0.42916400 | 2.23697500  | 1 | -3.13185100 | 1.58802800  | 3.18746700  | 1                 | -1.18444200 | 2.81261600  | -0.45403800 |
| 1 | 3.31145400  | 0.14934400  | 3.15219400  | 1 | -3.66029300 | 0.45802700  | 1.93275600  | 6                 | 1.51666700  | 4.03493100  | -2.13014200 |
| 6 | 4.52183800  | -1.25258400 | 2.01767000  | 6 | -3.26795700 | 2.44608600  | 1.20867300  | 1                 | 2.45665300  | 3.06132700  | -3.81632000 |
| 1 | 5.28979000  | -1.29551900 | 2.79440100  | 1 | -2.66687100 | 3.33763000  | 1.43391200  | 1                 | 0.33642700  | 4.76718500  | -0.47614500 |
| 6 | 4.68354000  | -1.99706600 | 0.86595200  | 1 | -4.32097400 | 2.73666700  | 1.31505100  | 1                 | 2.17496300  | 4.90548700  | -2.15753500 |
| 1 | 5.56282100  | -2.62784300 | 0.71791000  | 1 | -3.10558000 | 2.18032900  | 0.15497300  | 8                 | 1.55344300  | 1.42178400  | 3.33348100  |
| 6 | 3.69404600  | -1.93789200 | -0.14414200 | 1 | -1.01030600 | -0.07272600 | -2.87847600 |                   |             |             |             |
| 6 | 3.74818600  | -2.65111100 | -1.36672900 | 6 | -1.59149600 | 0.03904900  | -0.78626800 |                   |             |             |             |
| 1 | 4.60027100  | -3.30327500 | -1.57219700 | 6 | -0.95672500 | 0.53244700  | -1.95579000 |                   |             |             |             |
| 6 | 2.72156100  | -2.51220900 | -2.28100700 | 6 | -2.66581000 | -0.95938500 | -0.86202300 | TS19 <sup>s</sup> |             |             |             |
| 1 | 2.73407500  | -3.04996400 | -3.23047200 | 6 | -2.34481600 | -2.32086600 | -1.01140800 | 27                | -0.62918800 | -0.46632900 | 0.62449800  |
| 6 | 1.64041600  | -1.66944100 | -1.99187300 | 6 | -4.02554500 | -0.61020800 | -0.78363300 | 7                 | -1.32473900 | 1.43399800  | 0.02309500  |
| 1 | 0.81196700  | -1.53809300 | -2.69451400 | 6 | -3.34006500 | -3.29286300 | -1.06515300 | 7                 | -2.54191700 | -0.81819800 | 0.58551900  |
| 6 | 2.56365100  | -1.10447400 | 0.07628800  | 1 | -1.28853100 | -2.60350100 | -1.06797800 | 7                 | 1.62417200  | 3.48469100  | 0.00647400  |
| 6 | 0.86601300  | 1.15201000  | 2.35404400  | 6 | -5.02067300 | -1.58512600 | -0.82467900 | 6                 | -2.64561100 | 1.36389700  | -0.38207500 |
| 6 | -0.54794500 | 1.73811000  | 2.29531200  | 1 | -4.30503700 | 0.44388100  | -0.69488200 | 6                 | -3.40399700 | 2.34327500  | -1.02718900 |
| 1 | -0.73958000 | 2.22068400  | 3.26609400  | 6 | -4.68401600 | -2.93211300 | -0.96224100 | 1                 | -2.92779900 | 3.28166700  | -1.30394600 |
| 1 | -0.59377400 | 2.50959000  | 1.51237300  | 1 | -3.06321700 | -4.34372300 | -1.18246400 | 6                 | -4.76252600 | 2.12085100  | -1.32022200 |
| 6 | -1.47156100 | -0.45605500 | 2.90602200  | 1 | -6.07057700 | -1.28841000 | -0.75773300 | 1                 | -5.32301100 | 2.90946800  | -1.82910000 |
| 1 | -2.06475200 | -0.26069800 | 3.81638300  | 1 | -5.46485600 | -3.69511100 | -0.99552200 | 6                 | -5.39813600 | 0.94076200  | -0.99018500 |
| 1 | -0.42724900 | -0.52264800 | 3.23594300  | 6 | -0.17383200 | 1.75806000  | -2.04600400 | 1                 | -6.45242900 | 0.78033800  | -1.22735900 |
| 6 | -1.87698200 | -1.74417200 | 2.24101000  | 6 | 0.84090100  | 1.88835700  | -3.02594100 | 6                 | -4.67260900 | -0.08398700 | -0.33758900 |
| 1 | -2.91007900 | -1.72940100 | 1.86452900  | 6 | -0.34284800 | 2.83787700  | -1.14715800 | 6                 | -5.23001300 | -1.33213300 | 0.03780600  |
|   |             |             |             |   |             |             |             | 1                 | -6.28210500 | -1.53365400 | -0.18019500 |

|   |             |             |             |   |             |             |             |                   |             |             |             |
|---|-------------|-------------|-------------|---|-------------|-------------|-------------|-------------------|-------------|-------------|-------------|
| 6 | -4.44311500 | -2.27211500 | 0.66420500  | 1 | 0.00766600  | -1.93828200 | 3.21530100  | 1                 | 7.14467700  | -1.24636300 | 0.33461800  |
| 1 | -4.84433700 | -3.24238600 | 0.96131700  | 1 | -0.24600600 | -0.71945500 | 4.48530600  | 1                 | 4.62686500  | -3.68256100 | -2.17363000 |
| 6 | -3.09074200 | -1.97804100 | 0.91762800  | 6 | 2.57812200  | -0.68100100 | 0.76098700  | 1                 | 6.90733700  | -2.99214400 | -1.43472800 |
| 1 | -2.43086100 | -2.71078700 | 1.39319600  | 6 | 1.24533500  | -0.89025300 | 0.55675800  | 8                 | -0.75690500 | 3.54537200  | -0.83085400 |
| 6 | -3.29726900 | 0.13420700  | -0.03733700 | 1 | 0.67261600  | -0.35780300 | 1.62804300  |                   |             |             |             |
| 6 | -0.57592000 | 2.50816600  | -0.14794900 | 1 | 2.85413500  | 0.11746700  | 1.46735500  |                   |             |             |             |
| 6 | 0.72511700  | 2.48785700  | 0.65776200  | 1 | 0.88403700  | 4.00047200  | -0.56030500 | TS20 <sup>s</sup> |             |             |             |
| 1 | 0.52435900  | 2.79897300  | 1.69213500  | 6 | 0.46051300  | -1.91515300 | -0.12856600 | 27                | -0.03580400 | -1.33607900 | -0.19464000 |
| 1 | 1.20034000  | 1.50275800  | 0.69127300  | 6 | 0.38616400  | -3.30639200 | 0.20610700  | 7                 | -0.07225700 | 0.55080100  | -0.52213900 |
| 6 | 2.26838700  | 4.41433000  | 0.97249200  | 6 | -0.35468200 | -1.38717700 | -1.21393300 | 1                 | 2.32909100  | -1.05833000 | -0.15545500 |
| 1 | 2.91141100  | 3.80649700  | 1.62744900  | 6 | -0.55632400 | -4.10373400 | -0.39494800 | 7                 | -1.77076500 | -1.16046100 | 0.30172700  |
| 1 | 1.45300800  | 4.80229600  | 1.59849400  | 1 | 1.06537800  | -3.70833100 | 0.96480100  | 7                 | 2.79125700  | -0.06880000 | 0.29168700  |
| 6 | 3.02809200  | 5.54185200  | 0.32340800  | 6 | -1.31773400 | -2.26680400 | -1.80086400 | 6                 | -1.38797100 | 1.04418400  | -0.44213500 |
| 1 | 3.94587100  | 5.21034900  | -0.17810600 | 1 | 0.01738400  | -0.56388900 | -1.83589500 | 6                 | -1.88249300 | 2.31863700  | -0.73898400 |
| 1 | 3.32772700  | 6.26705200  | 1.08944600  | 6 | -1.44198300 | -3.56778300 | -1.37937000 | 1                 | -1.21483300 | 3.08052500  | -1.12705400 |
| 1 | 2.40923300  | 6.08008400  | -0.40833300 | 1 | -0.63817200 | -5.15781800 | -0.11640800 | 6                 | -3.24609800 | 2.60635100  | -0.53905600 |
| 6 | 2.58696700  | 2.83218900  | -0.93779200 | 1 | -1.95794400 | -1.89293300 | -2.60691800 | 1                 | -3.60089300 | 3.61148000  | -0.78232500 |
| 1 | 3.30726300  | 2.27513400  | -0.31680900 | 1 | -2.19172200 | -4.21995900 | -1.83548000 | 6                 | -4.14056000 | 1.67125700  | -0.05611800 |
| 1 | 3.13548600  | 3.63986900  | -1.44135600 | 6 | 3.71938100  | -1.35945600 | 0.16956600  | 1                 | -5.19520200 | 1.91853000  | 0.08678600  |
| 6 | 1.90806100  | 1.93347100  | -1.93745900 | 6 | 5.02014500  | -0.98170000 | 0.56693100  | 6                 | -3.68678700 | 0.36714200  | 0.25041000  |
| 1 | 1.40337100  | 1.08590200  | -1.45217400 | 6 | 3.60956100  | -2.34839300 | -0.83234000 | 6                 | -4.51125300 | -0.67851400 | 0.74304600  |
| 1 | 2.66364600  | 1.51271800  | -2.61212700 | 6 | 6.15169900  | -1.55796100 | -0.00010500 | 1                 | -5.57446400 | -0.49525900 | 0.91213300  |
| 1 | 1.16998200  | 2.47841000  | -2.54119900 | 1 | 5.13079300  | -0.21986800 | 1.34565300  | 6                 | -3.94687600 | -1.91574000 | 0.99765500  |
| 8 | -0.26092000 | 0.03256200  | 2.56779300  | 6 | 4.74264200  | -2.92023000 | -1.39886200 | 1                 | -4.55121700 | -2.74162400 | 1.37810200  |
| 6 | -0.53557100 | -0.99741500 | 3.45239300  | 1 | 2.62105800  | -2.66557900 | -1.17112900 | 6                 | -2.58352000 | -2.12676200 | 0.77142900  |
| 1 | -1.61437600 | -1.25512200 | 3.48532500  | 6 | 6.02157500  | -2.53422100 | -0.98877000 | 1                 | -2.12050400 | -3.09834600 | 0.96850000  |

|   |             |             |             |                   |             |             |             |  |   |             |             |             |
|---|-------------|-------------|-------------|-------------------|-------------|-------------|-------------|--|---|-------------|-------------|-------------|
| 6 | -2.31159700 | 0.08052300  | 0.04518300  |                   |             |             |             |  | 6 | -3.74307800 | -1.79540400 | 0.46919900  |
| 6 | 0.93725200  | 1.40752100  | -0.82434100 | TS21 <sup>s</sup> |             |             |             |  | 1 | -4.52971900 | -1.53140500 | -0.25684500 |
| 6 | 2.39849300  | 0.94877000  | -0.70906800 | 27                | 0.16391700  | 1.28055600  | -0.32940200 |  | 1 | -4.18446600 | -1.63595800 | 1.46669500  |
| 6 | 4.25314000  | -0.31514100 | 0.29777900  | 7                 | 0.39583500  | -0.58311900 | -0.72871400 |  | 6 | -3.32267600 | -3.23368800 | 0.27041400  |
| 1 | 4.53666100  | -0.49324200 | -0.75142800 | 1                 | -3.21183400 | 0.34188000  | 0.23893800  |  | 1 | -2.75326000 | -3.36637100 | -0.65978600 |
| 1 | 4.40357900  | -1.27239600 | 0.82100800  | 7                 | 1.88497800  | 1.18737300  | 0.25245100  |  | 1 | -4.21398300 | -3.87323700 | 0.22383400  |
| 6 | 5.11408600  | 0.76417000  | 0.90718700  | 7                 | -2.68685300 | -0.76903100 | 0.30989100  |  | 1 | -2.68929500 | -3.61019200 | 1.08183000  |
| 1 | 4.94964700  | 1.74662600  | 0.44408400  | 6                 | 1.70866300  | -1.01922500 | -0.53933600 |  | 6 | -1.80824000 | -0.55716600 | 1.49203300  |
| 1 | 6.17325100  | 0.51398300  | 0.76558200  | 6                 | 2.28711900  | -2.26204500 | -0.80719900 |  | 1 | -2.45304700 | -0.11437200 | 2.26876000  |
| 1 | 4.94966400  | 0.86349000  | 1.98828500  | 1                 | 1.68557800  | -3.05797700 | -1.23773500 |  | 1 | -1.09553700 | 0.24056300  | 1.17694900  |
| 6 | 2.18627700  | 0.12271300  | 1.64138600  | 6                 | 3.65057400  | -2.46730600 | -0.51822800 |  | 6 | -1.05720800 | -1.74468800 | 2.04490500  |
| 1 | 2.76417700  | -0.51105600 | 2.33145800  | 1                 | 4.08430300  | -3.44596800 | -0.74077700 |  | 1 | -1.70158700 | -2.40488100 | 2.64214900  |
| 1 | 1.17160100  | -0.32540000 | 1.56252900  | 6                 | 4.45100600  | -1.48415000 | 0.03244900  |  | 1 | -0.26037000 | -1.38403700 | 2.71027700  |
| 6 | 2.09550100  | 1.54669400  | 2.13316000  | 1                 | 5.50587600  | -1.67180300 | 0.24691900  |  | 1 | -0.57822100 | -2.35230600 | 1.26684500  |
| 1 | 3.06935700  | 2.04871600  | 2.20814700  | 6                 | 3.90130700  | -0.21160500 | 0.32171500  |  | 8 | -1.37504400 | 2.35733100  | -0.74321300 |
| 1 | 1.64877200  | 1.55010700  | 3.13573600  | 6                 | 4.61442800  | 0.87660800  | 0.88910800  |  | 6 | -1.54086800 | 3.01708200  | -1.97080900 |
| 1 | 1.44874400  | 2.16694300  | 1.49811700  | 1                 | 5.67221900  | 0.76306200  | 1.13639100  |  | 1 | -2.25909400 | 3.84980000  | -1.87666100 |
| 8 | 1.64927000  | -2.02803600 | -0.72212100 | 6                 | 3.94881000  | 2.06831600  | 1.11757600  |  | 1 | -0.58584100 | 3.43528000  | -2.32278300 |
| 6 | 1.95924400  | -2.25626400 | -2.06317300 | 1                 | 4.46625000  | 2.92456100  | 1.55498300  |  | 1 | -1.92036300 | 2.34178400  | -2.75986800 |
| 1 | 3.01202400  | -2.57793600 | -2.18306000 | 6                 | 2.59411200  | 2.19563700  | 0.79317200  |  | 8 | -0.48858600 | -2.67262100 | -1.21859700 |
| 1 | 1.33399600  | -3.05814000 | -2.49193100 | 1                 | 2.05311800  | 3.13054600  | 0.96744500  |  | 6 | -4.00567300 | 2.22342700  | 1.20548500  |
| 8 | 0.82796300  | 2.57320700  | -1.20389600 | 6                 | 2.53061600  | -0.00809900 | 0.02134700  |  | 1 | -4.48001400 | 3.18109800  | 0.93246100  |
| 1 | 2.72680200  | 0.56774100  | -1.68955700 | 6                 | -0.60016600 | -1.46236700 | -1.01091600 |  | 1 | -3.23083000 | 2.44398400  | 1.96496300  |
| 1 | 2.95930300  | 1.87752000  | -0.53572400 | 6                 | -1.98430900 | -0.82689800 | -1.01267400 |  | 1 | -4.78210800 | 1.61120400  | 1.69575300  |
| 1 | 1.81062900  | -1.36519700 | -2.70562000 | 1                 | -1.91522700 | 0.20427200  | -1.38438100 |  | 8 | -3.49636800 | 1.57300500  | 0.07929400  |
|   |             |             |             | 1                 | -2.62650900 | -1.39152500 | -1.70027100 |  | 1 | -2.44604400 | 2.03812700  | -0.30695600 |

|                   |             |             |             |   |             |             |             |                   |             |             |             |
|-------------------|-------------|-------------|-------------|---|-------------|-------------|-------------|-------------------|-------------|-------------|-------------|
|                   |             |             |             | 1 | -3.14925400 | 1.67621200  | 1.23272300  |                   |             |             |             |
|                   |             |             |             | 6 | -2.50527600 | 1.31520900  | -1.56300200 | TS23 <sup>S</sup> |             |             |             |
| TS22 <sup>S</sup> |             |             |             | 1 | -2.90704100 | 0.82939000  | -2.46426700 | 27                | -0.62588500 | 0.07658100  | 1.14105800  |
| 27                | -0.09782900 | -1.11772600 | -0.05800600 | 1 | -1.41074100 | 1.29466700  | -1.65891900 | 7                 | 0.21167600  | 1.48930400  | 0.01575100  |
| 8                 | -0.96649800 | 2.70431400  | 1.36139200  | 6 | -3.02722000 | 2.71889800  | -1.39205100 | 7                 | 1.10742900  | -0.85295800 | 0.85405300  |
| 7                 | -0.02970600 | 0.78111500  | 0.43916700  | 1 | -2.57360700 | 3.22151300  | -0.52702400 | 7                 | -1.83101400 | -1.22786600 | -0.02494300 |
| 7                 | 1.84145100  | -0.95270300 | -0.13910700 | 1 | -4.12064500 | 2.75925200  | -1.28665700 | 6                 | 1.46641300  | 1.07566700  | -0.45881600 |
| 7                 | -2.82825200 | 0.39561500  | -0.42918600 | 1 | -2.77113900 | 3.30885800  | -2.28084400 | 6                 | 2.26049100  | 1.81583700  | -1.32545000 |
| 6                 | 1.26828500  | 1.30185700  | 0.35038700  | 6 | -4.24167800 | -0.07929600 | -0.50491100 | 1                 | 1.88344100  | 2.76426400  | -1.71479800 |
| 6                 | 1.68105500  | 2.62676900  | 0.51712600  | 1 | -4.30024400 | -0.67236700 | -1.42950600 | 6                 | 3.54984000  | 1.36242300  | -1.66357500 |
| 1                 | 0.95062000  | 3.38315300  | 0.78689400  | 1 | -4.87380500 | 0.81103200  | -0.64927900 | 1                 | 4.16369500  | 1.96576200  | -2.33636300 |
| 6                 | 3.03238600  | 2.98470800  | 0.34951500  | 6 | -4.71029000 | -0.88468300 | 0.67711900  | 6                 | 4.06340100  | 0.18970900  | -1.13822300 |
| 1                 | 3.30958500  | 4.03357400  | 0.48437500  | 1 | -4.05430400 | -1.74356000 | 0.86890400  | 1                 | 5.07784000  | -0.13381900 | -1.38246500 |
| 6                 | 4.00297900  | 2.06125000  | 0.02442800  | 1 | -5.71491500 | -1.27137400 | 0.46484800  | 6                 | 3.28283400  | -0.59532700 | -0.25689600 |
| 1                 | 5.04734800  | 2.35484600  | -0.10527900 | 1 | -4.78288500 | -0.28364300 | 1.59302100  | 6                 | 3.72271100  | -1.78675200 | 0.37793200  |
| 6                 | 3.63648300  | 0.70634600  | -0.15099600 | 1 | -2.51349200 | -2.63073500 | -0.83596400 | 1                 | 4.73393400  | -2.15692600 | 0.19349500  |
| 6                 | 4.55058300  | -0.31759800 | -0.50105000 | 5 | -1.66285000 | -2.37653200 | -0.00336100 | 6                 | 2.86344300  | -2.45597600 | 1.22722700  |
| 1                 | 5.60605900  | -0.06993700 | -0.63903800 | 1 | -2.03091400 | -2.34510500 | 1.17180900  | 1                 | 3.17324700  | -3.37275000 | 1.73192100  |
| 6                 | 4.09275700  | -1.60867100 | -0.66798100 | 1 | -0.89878000 | -1.04383100 | -1.29624100 | 6                 | 1.55674900  | -1.97754400 | 1.41827500  |
| 1                 | 4.76953700  | -2.41850300 | -0.94652100 | 8 | -0.36087000 | -3.06176400 | -0.16910800 | 1                 | 0.84091000  | -2.53497600 | 2.03132100  |
| 6                 | 2.73248300  | -1.88709400 | -0.47614200 | 6 | 0.11649400  | -3.82779700 | 0.91101300  | 6                 | 1.96796700  | -0.14830600 | 0.04988700  |
| 1                 | 2.34186400  | -2.89809700 | -0.61797000 | 1 | -0.00636800 | -3.31027000 | 1.87839400  | 6                 | -1.01925100 | 0.93500300  | -0.51702800 |
| 6                 | 2.27047600  | 0.33914200  | 0.01801400  | 1 | -0.42988200 | -4.78226800 | 0.96807100  | 6                 | -1.15763500 | -0.44678100 | -1.11617400 |
| 6                 | -1.03629200 | 1.56083700  | 0.91144000  | 1 | 1.18257300  | -4.05207900 | 0.76500800  | 1                 | -1.74479300 | -0.44083800 | -2.05488400 |
| 6                 | -2.42591800 | 0.92019400  | 0.90045000  | 1 | -2.14623600 | -0.44332600 | -0.53931000 | 1                 | -0.19126000 | -0.92232000 | -1.33688100 |
| 1                 | -2.45704600 | 0.06485800  | 1.59120800  |   |             |             |             | 6                 | -3.27897200 | -0.91984700 | 0.12020900  |

|                   |             |             |             |   |             |             |             |                   |             |             |             |
|-------------------|-------------|-------------|-------------|---|-------------|-------------|-------------|-------------------|-------------|-------------|-------------|
| 1                 | -3.35134100 | 0.01739500  | 0.68767000  | 7 | -0.23119300 | 1.93320700  | -0.06251400 | 6                 | 3.76694100  | 0.38995500  | -0.46334600 |
| 1                 | -3.68950300 | -1.70763000 | 0.77190300  | 1 | 0.46729600  | 2.94028300  | 0.33981100  | 1                 | 3.45746200  | 1.34106200  | -0.01217500 |
| 6                 | -4.09100300 | -0.77970700 | -1.15141700 | 7 | -0.58724400 | -0.51317100 | -0.94327800 | 1                 | 4.18230400  | 0.62126400  | -1.45272500 |
| 1                 | -3.81237400 | 0.13448100  | -1.69219800 | 7 | 1.92477900  | -0.87070300 | 0.62918200  | 1                 | 4.56422900  | -0.04599500 | 0.15654500  |
| 1                 | -5.15334300 | -0.68105000 | -0.88954500 | 6 | -1.46225100 | 1.34722900  | 0.22334100  | 6                 | 1.51272300  | -2.21266000 | 0.96780600  |
| 1                 | -4.00212900 | -1.63083200 | -1.83973200 | 6 | -2.50770700 | 1.96009600  | 0.90056200  | 1                 | 1.91279700  | -2.89762400 | 0.20291900  |
| 6                 | -1.53150800 | -2.66397400 | -0.06167800 | 1 | -2.38916300 | 2.98911000  | 1.24555200  | 1                 | 0.40593700  | -2.31164000 | 0.91070200  |
| 1                 | -1.84566300 | -3.08706300 | 0.90728400  | 6 | -3.70957600 | 1.26102800  | 1.12845000  | 6                 | 1.97581000  | -2.64989600 | 2.34397000  |
| 1                 | -0.43509900 | -2.76061300 | -0.09277700 | 1 | -4.51938100 | 1.76528100  | 1.66109300  | 1                 | 3.07171300  | -2.62574500 | 2.42278400  |
| 6                 | -2.14086000 | -3.46633800 | -1.19431300 | 6 | -3.88891400 | -0.03722400 | 0.69049000  | 1                 | 1.63680400  | -3.67011300 | 2.57196500  |
| 1                 | -3.23392600 | -3.53844800 | -1.11524000 | 1 | -4.83112800 | -0.56178100 | 0.86493000  | 1                 | 1.57526600  | -1.99115900 | 3.12792700  |
| 1                 | -1.74918600 | -4.49280600 | -1.18239100 | 6 | -2.85234100 | -0.69400100 | -0.01671500 | 1                 | 1.73049900  | 1.94461700  | -1.76698700 |
| 1                 | -1.90030900 | -3.03774000 | -2.17832000 | 6 | -2.94191600 | -2.00158600 | -0.55727100 | 8                 | 1.58932400  | 2.58072900  | 0.89934000  |
| 1                 | -1.73951200 | 0.87058000  | 1.76861400  | 1 | -3.85469400 | -2.58483600 | -0.41223100 |                   |             |             |             |
| 8                 | -1.97314200 | 1.77744500  | -0.79894500 | 6 | -1.87760700 | -2.51484500 | -1.26978400 |                   |             |             |             |
| 1                 | -1.59517800 | 2.85015500  | -0.40507100 | 1 | -1.91943100 | -3.51650900 | -1.70112100 | TS25 <sup>S</sup> |             |             |             |
| 8                 | -0.83795400 | 3.69735500  | 0.05982900  | 6 | -0.71472800 | -1.74301200 | -1.43754600 | 27                | 0.63940000  | -0.48965400 | -0.34432300 |
| 1                 | -0.07588100 | 2.71362100  | 0.10716200  | 1 | 0.15029500  | -2.14557400 | -1.97494200 | 8                 | 0.32746900  | 3.38768200  | 1.07796700  |
| 6                 | -1.23689900 | 4.03527600  | 1.36078400  | 6 | -1.63977000 | 0.01396000  | -0.24300700 | 7                 | 1.06017200  | 1.49482500  | -0.07938000 |
| 1                 | -0.45692700 | 4.62669700  | 1.86802400  | 6 | 1.04341400  | 1.44888500  | 0.53684600  | 7                 | 2.50061500  | -0.64797200 | -0.03188400 |
| 1                 | -2.15162500 | 4.65038100  | 1.34272500  | 6 | 1.28824200  | 0.20501300  | 1.37359200  | 7                 | -1.93979100 | 3.46656500  | -0.43761500 |
| 1                 | -1.44031800 | 3.13885800  | 1.97642600  | 1 | 1.88127500  | 0.51848900  | 2.25212900  | 6                 | 2.42043500  | 1.70628500  | 0.19127200  |
|                   |             |             |             | 1 | 0.31954200  | -0.16674500 | 1.76409900  | 6                 | 3.08069000  | 2.93246100  | 0.31458300  |
|                   |             |             |             | 6 | 2.62104000  | -0.59390700 | -0.58185800 | 1                 | 2.55330700  | 3.87499500  | 0.15274500  |
|                   |             |             |             | 1 | 1.99688700  | -0.36296700 | -1.56902600 | 6                 | 4.46465300  | 2.96579400  | 0.57197000  |
| TS24 <sup>S</sup> |             |             |             | 1 | 3.01534200  | -1.56157400 | -0.94274900 | 1                 | 4.95876800  | 3.93517200  | 0.66680700  |
| 27                | 0.85211100  | 0.84284400  | -1.25259800 |   |             |             |             |                   |             |             |             |

|   |             |             |             |   |             |             |             |                   |             |             |             |
|---|-------------|-------------|-------------|---|-------------|-------------|-------------|-------------------|-------------|-------------|-------------|
| 6 | 5.19819100  | 1.80457000  | 0.70344300  | 6 | -1.32639600 | -5.59223100 | 0.38441500  | 1                 | 0.22312800  | 4.97356200  | -1.18297800 |
| 1 | 6.26696900  | 1.84241500  | 0.92561900  | 1 | -2.01231100 | -3.66331400 | 1.06975500  | 1                 | 1.22816800  | 3.34987300  | 1.44378900  |
| 6 | 4.57854600  | 0.54274500  | 0.52371900  | 6 | 0.49463500  | -5.57116000 | -1.19611300 |                   |             |             |             |
| 6 | 5.25836700  | -0.69760000 | 0.59590900  | 1 | 1.23436800  | -3.62003300 | -1.75688300 |                   |             |             |             |
| 1 | 6.32660800  | -0.71955400 | 0.82028500  | 6 | -0.42755000 | -6.28464600 | -0.42972200 | TS26 <sup>s</sup> |             |             |             |
| 6 | 4.54380700  | -1.86021700 | 0.36631200  | 1 | -2.05563000 | -6.14290100 | 0.98382200  | 27                | 0.46084500  | 0.19786900  | -0.05086800 |
| 1 | 5.03014600  | -2.83623100 | 0.41191700  | 1 | 1.19447600  | -6.10321600 | -1.84538200 | 8                 | -1.95480200 | 1.89896800  | 1.30242700  |
| 6 | 3.18589600  | -1.80216600 | 0.04019500  | 1 | -0.44883600 | -7.37609600 | -0.46930700 | 7                 | -0.59607900 | 1.87645100  | -0.57011500 |
| 1 | 2.61790800  | -2.70967300 | -0.17692900 | 6 | -2.57361100 | -0.76575600 | 0.22215100  | 7                 | 1.95901800  | 1.30222800  | -0.61590900 |
| 6 | 3.18513700  | 0.51308700  | 0.23799000  | 6 | -3.45013300 | -0.26129500 | -0.76041700 | 7                 | -4.06581500 | 0.81151000  | -0.26102500 |
| 6 | 0.14186900  | 2.35659100  | 0.26280300  | 6 | -3.11103000 | -1.03531000 | 1.49937600  | 6                 | 0.25802200  | 2.90372300  | -0.21932700 |
| 6 | -1.26178000 | 2.21190400  | -0.22355000 | 6 | -4.80154100 | -0.07019200 | -0.48734100 | 6                 | -0.10120100 | 4.19715000  | 0.15353100  |
| 1 | -1.23513000 | 1.53682300  | -1.10612600 | 1 | -3.05467100 | -0.03611100 | -1.75523700 | 1                 | -1.15303800 | 4.43346400  | 0.32297800  |
| 1 | -1.79406700 | 1.63541700  | 0.54884600  | 6 | -4.46218300 | -0.83473200 | 1.76909500  | 6                 | 0.88250400  | 5.19595700  | 0.28156400  |
| 6 | -1.65373600 | 4.04660200  | -1.73877100 | 1 | -2.44511000 | -1.40988000 | 2.28217300  | 1                 | 0.56939900  | 6.20380200  | 0.56594400  |
| 1 | -2.22912500 | 4.98420500  | -1.80913500 | 6 | -5.31883700 | -0.35459900 | 0.77745100  | 6                 | 2.22074300  | 4.94537600  | 0.04193900  |
| 1 | -2.04020600 | 3.39640000  | -2.55976800 | 1 | -5.46025700 | 0.30778000  | -1.27413600 | 1                 | 2.96678800  | 5.73806700  | 0.12843700  |
| 6 | -3.37237000 | 3.41614900  | -0.18044900 | 1 | -4.85073500 | -1.05813200 | 2.76619700  | 6                 | 2.63537400  | 3.63540300  | -0.30362800 |
| 1 | -3.89746600 | 2.74603100  | -0.90005200 | 1 | -6.37930400 | -0.20073600 | 0.98906300  | 6                 | 3.97200300  | 3.24614000  | -0.56041500 |
| 1 | -3.75905900 | 4.42763200  | -0.38744600 | 6 | -3.72813600 | 3.02544600  | 1.23490000  | 1                 | 4.76674500  | 3.99556500  | -0.52181100 |
| 1 | 0.72556500  | -1.49460000 | -1.40799000 | 6 | -0.18994100 | 4.33943900  | -1.98003400 | 6                 | 4.25612500  | 1.92728900  | -0.85443100 |
| 6 | -1.17023800 | -0.98835600 | -0.05030300 | 1 | -3.16275400 | 3.62823900  | 1.96043500  | 1                 | 5.27649900  | 1.60257000  | -1.06383400 |
| 6 | -0.35199300 | -2.02069800 | -0.24790100 | 1 | -4.79953100 | 3.18269500  | 1.41767500  | 6                 | 3.22504900  | 0.97331800  | -0.85591400 |
| 6 | -0.37228900 | -3.46796300 | -0.32388400 | 1 | -3.53649700 | 1.96288800  | 1.44735000  | 1                 | 3.43307600  | -0.08446900 | -1.03700900 |
| 6 | -1.30406600 | -4.20274800 | 0.43578100  | 1 | 0.41860400  | 3.42435600  | -2.04228100 | 6                 | 1.64627900  | 2.61665000  | -0.38911400 |
| 6 | 0.52500300  | -4.18101500 | -1.14001900 | 1 | -0.05623300 | 4.86493000  | -2.93485100 | 6                 | -1.71120900 | 1.57340500  | 0.10645300  |

|   |             |             |             |                   |             |             |             |    |             |             |             |
|---|-------------|-------------|-------------|-------------------|-------------|-------------|-------------|----|-------------|-------------|-------------|
| 6 | -2.68053600 | 0.66074900  | -0.64052300 | 6                 | -2.18620000 | -3.72345400 | -1.77732900 | 27 | 0.14311100  | 0.01679500  | 0.51787100  |
| 1 | -2.50325700 | 0.78350000  | -1.73227700 | 1                 | -1.48358300 | -1.68893100 | -1.95520900 | 8  | -1.44225200 | -0.71422000 | -1.57944700 |
| 1 | -2.37962700 | -0.37419800 | -0.42058900 | 6                 | -1.35036700 | -4.96821500 | 0.11590200  | 7  | -0.66069600 | -1.70937100 | 0.41816900  |
| 6 | -4.70673200 | 1.93606100  | -0.92678500 | 1                 | 0.01952800  | -3.91278300 | 1.41259000  | 7  | 1.78330200  | -1.08170200 | 0.94536100  |
| 1 | -5.74304000 | 1.99020200  | -0.55415100 | 6                 | -2.14302500 | -4.90407500 | -1.03205600 | 7  | -3.86316400 | -1.46449500 | 0.07450100  |
| 1 | -4.79195100 | 1.74890400  | -2.02451500 | 1                 | -2.78890300 | -3.67366100 | -2.68779700 | 6  | 0.28476200  | -2.58231200 | -0.08655800 |
| 6 | -4.82721800 | -0.41622600 | -0.45441300 | 1                 | -1.30156100 | -5.89456300 | 0.69367700  | 6  | 0.05136900  | -3.72023400 | -0.84838100 |
| 1 | -4.69990900 | -0.81515800 | -1.48906800 | 1                 | -2.71684200 | -5.77686400 | -1.35205300 | 1  | -0.95829300 | -3.92930300 | -1.20706700 |
| 1 | -5.89315800 | -0.14758900 | -0.37995600 | 6                 | -4.52211200 | -1.49822300 | 0.55708300  | 6  | 1.11885700  | -4.59192400 | -1.13980000 |
| 1 | 1.33183500  | -0.98663600 | 1.99298000  | 6                 | -4.02340200 | 3.26524800  | -0.70379600 | 1  | 0.91651200  | -5.48718200 | -1.73259900 |
| 6 | 0.02922600  | -1.47287400 | 0.27889700  | 1                 | -4.70225300 | -1.13989500 | 1.58015700  | 6  | 2.40797500  | -4.34752900 | -0.70130100 |
| 6 | 1.28976100  | -1.31116800 | 0.93743700  | 1                 | -5.15734400 | -2.37762900 | 0.38225800  | 1  | 3.22135300  | -5.03353900 | -0.94706000 |
| 6 | 2.51908000  | -1.98785900 | 0.50408100  | 1                 | -3.48119100 | -1.84992700 | 0.51090000  | 6  | 2.69133700  | -3.17210500 | 0.03805600  |
| 6 | 2.63110100  | -2.60129400 | -0.75988300 | 1                 | -3.02868800 | 3.30705700  | -1.17404600 | 6  | 3.97726600  | -2.76736600 | 0.47697800  |
| 6 | 3.65455500  | -2.00084000 | 1.33457700  | 1                 | -4.61401700 | 4.07544200  | -1.15199000 | 1  | 4.83951100  | -3.41187000 | 0.28813700  |
| 6 | 3.82095600  | -3.19649800 | -1.16709700 | 1                 | -3.89931400 | 3.47561800  | 0.36689800  | 6  | 4.12669100  | -1.55696800 | 1.12137600  |
| 1 | 1.77125000  | -2.58827500 | -1.43619900 | 1                 | -2.06795200 | 0.64636600  | 1.88644100  | 1  | 5.10586000  | -1.21585200 | 1.46149600  |
| 6 | 4.84716900  | -2.59101800 | 0.92478700  | 6                 | -1.18479400 | -0.49694600 | 3.39628100  | 6  | 3.00499400  | -0.73356200 | 1.33311500  |
| 1 | 3.59369800  | -1.52526900 | 2.31864000  | 1                 | -0.39078200 | 0.25295200  | 3.52533800  | 1  | 3.11179100  | 0.24342600  | 1.81497100  |
| 6 | 4.93942600  | -3.19370700 | -0.33016600 | 1                 | -1.95211200 | -0.35354800 | 4.16527300  | 6  | 1.61590800  | -2.29131300 | 0.32595600  |
| 1 | 3.87947200  | -3.66419700 | -2.15344600 | 1                 | -0.76160200 | -1.50372600 | 3.49449100  | 6  | -1.52777800 | -0.93248700 | -0.28895600 |
| 1 | 5.71378200  | -2.58026100 | 1.59113100  | 8                 | -1.79645600 | -0.38732200 | 2.11506600  | 6  | -2.80213900 | -0.52804200 | 0.42022700  |
| 1 | 5.87387900  | -3.65730100 | -0.65443200 | 1                 | -1.05162500 | -0.59925700 | 1.31217300  | 1  | -2.63514600 | -0.50040800 | 1.51173600  |
| 6 | -0.67008800 | -2.64837200 | -0.19823600 |                   |             |             |             | 1  | -3.06839500 | 0.49699400  | 0.11401900  |
| 6 | -1.46504200 | -2.60920700 | -1.36418900 |                   |             |             |             | 6  | -4.30654700 | -2.29183500 | 1.18299800  |
| 6 | -0.61324700 | -3.86088400 | 0.52158700  | TS27 <sup>s</sup> |             |             |             | 1  | -5.16683200 | -2.87947900 | 0.82372800  |



|   |             |             |             |                   |             |             |             |   |             |             |             |
|---|-------------|-------------|-------------|-------------------|-------------|-------------|-------------|---|-------------|-------------|-------------|
| 1 | -4.70226800 | -1.66935100 | 2.02018700  | 1                 | -2.87018900 | 4.11015200  | 2.36585000  | 6 | 3.09170700  | -0.20739200 | 0.02205900  |
| 6 | -4.96142100 | -0.87160400 | -0.67337900 | 1                 | -1.31379800 | 5.94621600  | -1.20809000 | 6 | 3.73341700  | -0.38845100 | -1.23058300 |
| 1 | -5.48143900 | -0.08878800 | -0.07246900 | 1                 | -2.58326400 | 6.13403100  | 0.93242500  | 1 | 4.79881000  | -0.16187300 | -1.32451000 |
| 1 | -5.70864400 | -1.66691300 | -0.82846400 | 6                 | -4.55850500 | -0.29977000 | -2.01246800 | 6 | 3.00420600  | -0.83134900 | -2.31208300 |
| 1 | 0.88975500  | 0.28433300  | -1.82278800 | 6                 | -3.24398800 | -3.22947000 | 1.70750600  | 1 | 3.47333800  | -0.97789000 | -3.28715400 |
| 6 | -0.51114100 | 1.41769000  | -0.61236600 | 1                 | -4.04752200 | -1.05229200 | -2.62716200 | 6 | 1.62966000  | -1.09085800 | -2.15913000 |
| 6 | 0.79867100  | 1.06021700  | -1.04501300 | 1                 | -5.44505900 | 0.05581900  | -2.55496300 | 1 | 1.02994200  | -1.42967600 | -3.00976200 |
| 6 | 2.05841500  | 1.74832700  | -0.74610600 | 1                 | -3.87416700 | 0.55482800  | -1.91640400 | 6 | 1.70678500  | -0.53561900 | 0.09321200  |
| 6 | 2.15960800  | 2.71143300  | 0.27953300  | 1                 | -2.37032400 | -2.69148300 | 2.10106000  | 6 | -1.49696900 | -0.07696800 | 1.40223800  |
| 6 | 3.24291500  | 1.35352700  | -1.39777100 | 1                 | -3.64381900 | -3.85205600 | 2.51963000  | 6 | -1.34890900 | 1.40903600  | 1.13853100  |
| 6 | 3.39406800  | 3.24647100  | 0.63631500  | 1                 | -2.88014800 | -3.89641000 | 0.91282000  | 1 | -2.27779800 | 1.97100500  | 1.31344800  |
| 1 | 1.25586900  | 3.03817100  | 0.80200400  | 1                 | -1.26274600 | 0.44969700  | -1.46709800 | 1 | -0.54700900 | 1.88494000  | 1.72763600  |
| 6 | 4.47474100  | 1.89160300  | -1.04279100 |                   |             |             |             | 6 | -1.96817700 | 1.14311100  | -1.28149700 |
| 1 | 3.18169700  | 0.59482900  | -2.18432300 |                   |             |             |             | 1 | -1.82936700 | 0.08096600  | -1.76156200 |
| 6 | 4.55708200  | 2.84185000  | -0.02214100 | TS28 <sup>s</sup> |             |             |             | 1 | -1.73426100 | 1.74956300  | -2.17593800 |
| 1 | 3.44939400  | 3.99160600  | 1.43370300  | 27                | -0.96925500 | -0.58228400 | -0.42786100 | 6 | -3.40428500 | 1.34642100  | -0.87007900 |
| 1 | 5.38037600  | 1.56602100  | -1.56080500 | 7                 | -0.32146900 | -0.81566800 | 1.32188400  | 1 | -3.67027100 | 0.72598800  | -0.00336000 |
| 1 | 5.52370200  | 3.26746400  | 0.25714100  | 7                 | 0.98812300  | -0.94793100 | -1.00384100 | 1 | -4.06653200 | 1.06267400  | -1.69767100 |
| 6 | -1.05755200 | 2.68897000  | -0.17444400 | 7                 | -0.92306700 | 1.41883000  | -0.28697100 | 1 | -3.60423200 | 2.40161000  | -0.63148600 |
| 6 | -1.78145800 | 2.82068800  | 1.03108800  | 6                 | 0.97224400  | -0.36228200 | 1.32041800  | 6 | 0.12403300  | 2.36939900  | -0.67242300 |
| 6 | -0.91186900 | 3.84798500  | -0.97192200 | 6                 | 1.64016200  | 0.19975300  | 2.41180300  | 1 | 0.50305100  | 2.06238800  | -1.66105700 |
| 6 | -2.32003500 | 4.04158400  | 1.42361700  | 1                 | 1.09176100  | 0.34840800  | 3.34502200  | 1 | 0.96319700  | 2.23000700  | 0.02809800  |
| 1 | -1.90229600 | 1.93904700  | 1.66990000  | 6                 | 3.00323800  | 0.53276500  | 2.32498300  | 6 | -0.34147300 | 3.80827000  | -0.67887600 |
| 6 | -1.44804200 | 5.06670700  | -0.57252400 | 1                 | 3.49651900  | 0.96258400  | 3.20106100  | 1 | -1.16815700 | 3.96644100  | -1.38751000 |
| 1 | -0.35987200 | 3.77290000  | -1.91297900 | 6                 | 3.73181700  | 0.32469900  | 1.16853000  | 1 | 0.47268000  | 4.48580500  | -0.96825500 |
| 6 | -2.15812900 | 5.17591200  | 0.62587100  | 1                 | 4.79072900  | 0.58721300  | 1.11491900  | 1 | -0.69155600 | 4.12110400  | 0.31547600  |

|                   |             |             |             |   |             |             |             |    |             |             |             |
|-------------------|-------------|-------------|-------------|---|-------------|-------------|-------------|----|-------------|-------------|-------------|
| 8                 | -2.61446200 | -0.63553500 | 1.78329200  | 1 | 0.33484900  | -3.57013500 | 0.58874300  | 1  | -0.92697100 | 3.07655300  | 2.18495500  |
| 1                 | -2.61504400 | -1.51142100 | 0.93631900  | 6 | 2.30951200  | -1.04441700 | 1.35975900  | 1  | -0.18778900 | 4.67899000  | 1.95816900  |
| 8                 | -2.26187000 | -2.01311600 | -0.14038000 | 6 | 0.81084200  | 0.79039300  | -0.74497100 | 27 | -0.22810900 | -0.49583300 | 0.36621100  |
| 6                 | -1.80895800 | -3.32669300 | -0.00397200 | 6 | 1.73110400  | 0.04381700  | -1.70418600 | 1  | -1.18302800 | -1.69095800 | -0.29784100 |
| 1                 | -1.32812300 | -3.67069700 | -0.93563700 | 1 | 2.32729900  | -0.71203300 | -1.14903900 | 6  | -2.13534300 | -1.04357600 | -0.09371300 |
| 1                 | -1.07280400 | -3.43547400 | 0.81366900  | 1 | 1.07481600  | -0.53666300 | -2.37511800 | 6  | -1.91398700 | 0.22982400  | 0.26949400  |
| 1                 | -2.65041700 | -4.01246000 | 0.20091000  | 6 | 3.45274800  | 1.77728900  | -1.82617400 | 6  | -3.29599700 | -1.88026500 | -0.35898500 |
|                   |             |             |             | 1 | 2.91495100  | 2.24421000  | -0.98075000 | 6  | -3.14304600 | -3.22259100 | -0.75220700 |
|                   |             |             |             | 1 | 3.70884700  | 2.62195200  | -2.48907800 | 6  | -4.60248900 | -1.36700800 | -0.23639200 |
| TS30 <sup>s</sup> |             |             |             | 6 | 4.73329900  | 1.11886600  | -1.32687100 | 6  | -4.24897900 | -4.02599400 | -1.00900100 |
| 7                 | 1.08597800  | 0.90147700  | 0.67367400  | 1 | 4.52637700  | 0.19517300  | -0.76333900 | 6  | -5.70429400 | -2.17326900 | -0.49512400 |
| 7                 | 1.21377000  | -1.71915400 | 0.88008400  | 1 | 5.29147800  | 1.78820000  | -0.65525300 | 6  | -5.53682000 | -3.50551000 | -0.88104300 |
| 7                 | 2.51377800  | 0.92927500  | -2.52166300 | 1 | 5.40792900  | 0.85623300  | -2.15500000 | 6  | -2.74868000 | 1.40736700  | 0.37092500  |
| 6                 | 2.25142900  | 0.36430500  | 1.24323300  | 6 | 2.87977200  | 0.42792400  | -3.82593600 | 6  | -2.95315300 | 2.21828000  | -0.76141000 |
| 6                 | 3.29544700  | 1.12882700  | 1.74128100  | 1 | 3.45708500  | 1.21934600  | -4.33230600 | 6  | -3.36186400 | 1.77300400  | 1.58227700  |
| 1                 | 3.24403900  | 2.21786700  | 1.66733600  | 1 | 1.95642200  | 0.31287000  | -4.42469900 | 6  | -3.75776800 | 3.35114700  | -0.67938500 |
| 6                 | 4.40654400  | 0.49632100  | 2.33333700  | 6 | 3.65063700  | -0.88594800 | -3.87458200 | 6  | -4.16916800 | 2.90483500  | 1.65392900  |
| 1                 | 5.22121600  | 1.11236600  | 2.72092000  | 1 | 4.61834400  | -0.82892900 | -3.35735000 | 6  | -4.37035300 | 3.70030800  | 0.52524900  |
| 6                 | 4.48558000  | -0.87985100 | 2.43252500  | 1 | 3.84820600  | -1.18676400 | -4.91364500 | 1  | -2.13464000 | -3.63454600 | -0.86218100 |
| 1                 | 5.35089600  | -1.35675500 | 2.89819900  | 1 | 3.08079400  | -1.70395300 | -3.40853300 | 1  | -4.74417700 | -0.32685200 | 0.06576800  |
| 6                 | 3.42944500  | -1.69054400 | 1.94833300  | 8 | 0.17944300  | 1.79935500  | -1.26029800 | 1  | -4.10562100 | -5.06547100 | -1.31355500 |
| 6                 | 3.38758100  | -3.10578300 | 2.02541300  | 1 | 0.12446900  | 2.66761400  | -0.41516600 | 1  | -6.70957000 | -1.75718100 | -0.39448200 |
| 1                 | 4.22411100  | -3.65025600 | 2.46941400  | 8 | 0.43631200  | 3.24381600  | 0.61407300  | 1  | -6.40702800 | -4.13393700 | -1.08255100 |
| 6                 | 2.27990400  | -3.77255600 | 1.54143100  | 1 | 0.80020000  | 2.08879800  | 0.92135700  | 1  | -2.46151500 | 1.95009000  | -1.69871300 |
| 1                 | 2.21429400  | -4.86077600 | 1.58701300  | 6 | -0.56558900 | 3.79155400  | 1.42312500  | 1  | -3.20181400 | 1.15305300  | 2.46856800  |
| 6                 | 1.21553700  | -3.05075100 | 0.97653900  | 1 | -1.44380900 | 4.10801200  | 0.83586600  | 1  | -3.90737200 | 3.96956400  | -1.56789100 |

|                   |             |             |             |    |             |             |             |                                    |             |             |             |
|-------------------|-------------|-------------|-------------|----|-------------|-------------|-------------|------------------------------------|-------------|-------------|-------------|
| 1                 | -4.64412600 | 3.16978000  | 2.60190000  | 1  | -1.64745200 | -2.89545300 | 2.00536200  | 6                                  | 6.11501000  | -2.16766000 | -0.53842700 |
| 1                 | -5.00205600 | 4.58951000  | 0.58450200  | 1  | -2.74328000 | -1.61296200 | 2.50280100  | 6                                  | 1.39563600  | 2.32530900  | 0.58979900  |
|                   |             |             |             | 6  | -2.19703200 | -2.81316600 | -0.57205200 | 6                                  | 1.15183600  | 2.98762800  | 1.81087900  |
|                   |             |             |             | 1  | -1.09827800 | -2.76308600 | -0.49153900 | 6                                  | 1.03750300  | 2.97808300  | -0.60987200 |
| TS31 <sup>s</sup> |             |             |             | 1  | -2.43790400 | -2.40088300 | -1.57022300 | 6                                  | 0.57499900  | 4.25247000  | 1.82539300  |
| 7                 | -1.03391200 | 0.46994200  | 1.40614600  | 6  | -2.64958300 | -4.26376800 | -0.49943900 | 6                                  | 0.45762800  | 4.24216100  | -0.58289400 |
| 1                 | -0.34644000 | 0.44689800  | 2.47715700  | 1  | -2.48727400 | -4.68882600 | 0.50278400  | 6                                  | 0.22111600  | 4.88607600  | 0.63215700  |
| 7                 | -0.24202100 | -0.24641000 | -1.03700400 | 1  | -2.08939500 | -4.88620000 | -1.21176300 | 1                                  | 2.84730400  | -2.78953000 | 0.23194900  |
| 7                 | -2.72609700 | -1.91595300 | 0.43265400  | 1  | -3.71606000 | -4.37932200 | -0.74061100 | 1                                  | 4.86776700  | 0.98375300  | -0.16568900 |
| 6                 | -1.72654800 | 1.02821100  | 0.32523300  | 6  | -4.14200300 | -1.62625900 | 0.43410700  | 1                                  | 4.97203300  | -3.98450100 | -0.30387900 |
| 6                 | -2.73211300 | 1.97067700  | 0.43687300  | 1  | -4.46746200 | -1.58823600 | -0.62000800 | 1                                  | 6.98858900  | -0.19650500 | -0.69759000 |
| 1                 | -3.02624500 | 2.31863300  | 1.42895600  | 1  | -4.28826600 | -0.59647500 | 0.81480600  | 1                                  | 7.04718500  | -2.68790400 | -0.77083600 |
| 6                 | -3.36875200 | 2.46749300  | -0.72084700 | 6  | -5.04280000 | -2.56753700 | 1.22230000  | 1                                  | 1.41842300  | 2.48864800  | 2.74594500  |
| 1                 | -4.16244300 | 3.20998100  | -0.61114800 | 1  | -5.02662900 | -3.59376400 | 0.83188700  | 1                                  | 1.21523600  | 2.47033100  | -1.56196700 |
| 6                 | -3.01542000 | 2.02924500  | -1.97985300 | 1  | -6.08611500 | -2.22120100 | 1.20159000  | 1                                  | 0.39698100  | 4.75080400  | 2.78154800  |
| 1                 | -3.51860300 | 2.41720200  | -2.86839400 | 1  | -4.74463300 | -2.61761400 | 2.28028200  | 1                                  | 0.18402900  | 4.72828100  | -1.52289100 |
| 6                 | -1.96711000 | 1.08656500  | -2.14026100 | 8  | -0.00997000 | -0.79935500 | 2.71957100  | 1                                  | -0.23584800 | 5.87792100  | 0.65016900  |
| 6                 | -1.49055600 | 0.61747400  | -3.38890400 | 27 | 0.54392400  | -0.54267700 | 0.65194800  |                                    |             |             |             |
| 1                 | -1.96582600 | 0.96083200  | -4.31093300 | 1  | 0.94246900  | -1.95122400 | 0.30899400  |                                    |             |             |             |
| 6                 | -0.41985700 | -0.25204300 | -3.42326800 | 6  | 2.50031400  | -0.10775700 | 0.35799600  | BH <sub>2</sub> OMeNH <sub>3</sub> |             |             |             |
| 1                 | -0.02412600 | -0.62327300 | -4.36970800 | 6  | 1.89741200  | 0.98992500  | 0.54875100  | 1                                  | -0.39822500 | 0.73770500  | 1.50336900  |
| 6                 | 0.18767300  | -0.66233900 | -2.22428300 | 6  | 3.71426900  | -0.82918800 | 0.06237100  | 1                                  | -1.06784200 | 1.75600700  | -0.16628500 |
| 1                 | 1.04647500  | -1.33782800 | -2.21460400 | 6  | 3.76340100  | -2.23226400 | 0.02038900  | 1                                  | -1.29235300 | -1.37829200 | 0.28564300  |
| 6                 | -1.31298700 | 0.61117400  | -0.97264900 | 6  | 4.89721600  | -0.10807400 | -0.19954300 | 1                                  | -2.51633700 | -0.28307700 | 0.37003300  |
| 6                 | -0.91014900 | -0.93027800 | 1.70893500  | 6  | 4.95216400  | -2.89224200 | -0.27815500 | 1                                  | -1.73957800 | -0.54820100 | -1.05944100 |
| 6                 | -2.04053700 | -1.90534400 | 1.70123500  | 6  | 6.08157000  | -0.77197600 | -0.49666900 | 5                                  | -0.48932800 | 0.77994100  | 0.27971500  |

|      |             |             |             |   |             |             |             |                   |             |             |             |
|------|-------------|-------------|-------------|---|-------------|-------------|-------------|-------------------|-------------|-------------|-------------|
| 7    | -1.60703500 | -0.46850400 | -0.05122300 | 1 | 2.37840500  | -0.61754600 | -2.04205600 | 6                 | 2.40441800  | -2.44764800 | 0.55495600  |
| 8    | 0.68386200  | 0.44806200  | -0.45409300 | 6 | 0.21154200  | 1.67968000  | -1.09105600 | 6                 | 2.47201000  | -3.14921800 | -0.66022700 |
| 6    | 1.59997000  | -0.41223600 | 0.12920000  | 6 | -2.70808400 | 0.33332200  | 0.60660500  | 6                 | 3.58726200  | -2.30655600 | 1.29978400  |
| 1    | 1.90840000  | -0.08774200 | 1.14152800  | 6 | -3.00627000 | -1.12230600 | 0.95868700  | 6                 | 3.67896000  | -3.66730900 | -1.12544500 |
| 1    | 1.22494400  | -1.45500400 | 0.23655500  | 1 | -2.15520200 | -1.79025200 | 0.75147500  | 1                 | 1.55239200  | -3.26818300 | -1.24373400 |
| 1    | 2.50615900  | -0.47265000 | -0.49386900 | 1 | -3.32331900 | -1.22869400 | 2.00384300  | 6                 | 4.79520300  | -2.82153400 | 0.83442200  |
|      |             |             |             | 6 | -3.73648400 | -1.52062200 | -1.36943800 | 1                 | 3.54991000  | -1.77740000 | 2.25609700  |
|      |             |             |             | 1 | -2.66006000 | -1.78746000 | -1.40701600 | 6                 | 4.84836800  | -3.50134500 | -0.38268400 |
| IM18 |             |             |             | 1 | -3.81684500 | -0.45319500 | -1.61692700 | 1                 | 3.70701500  | -4.20350800 | -2.07771200 |
| 27   | -0.11512100 | -1.06029200 | -0.27516400 | 6 | -4.57346700 | -2.39034600 | -2.26512500 | 1                 | 5.70284400  | -2.69417100 | 1.43016400  |
| 7    | -1.50150900 | 0.49039200  | 0.05592200  | 1 | -4.52866300 | -3.44893200 | -1.96794100 | 1                 | 5.79644100  | -3.90311000 | -0.74841000 |
| 7    | 0.79261000  | 0.45553700  | -1.27463300 | 1 | -4.17088300 | -2.33734700 | -3.28380900 | 6                 | 1.51109600  | 0.57069500  | 1.67278100  |
| 7    | -4.12901600 | -1.63052500 | 0.08579400  | 1 | -5.62821600 | -2.08852200 | -2.32156100 | 6                 | 0.86819600  | 1.66627000  | 2.29189300  |
| 6    | -1.03477000 | 1.72386900  | -0.37896600 | 6 | -5.48669000 | -1.03068700 | 0.35438400  | 6                 | 2.76051200  | 0.82955300  | 1.06524500  |
| 6    | -1.64085000 | 2.96907000  | -0.19319300 | 1 | -6.19321400 | -1.63435500 | -0.23248700 | 6                 | 1.42638500  | 2.93879200  | 2.30195200  |
| 1    | -2.58852100 | 3.01857000  | 0.33732000  | 1 | -5.45458600 | -0.01710600 | -0.06208200 | 1                 | -0.11303700 | 1.50468300  | 2.75029800  |
| 6    | -1.03181600 | 4.14252000  | -0.67206900 | 6 | -5.85248400 | -0.99726200 | 1.81165200  | 6                 | 3.31770400  | 2.10420100  | 1.07747400  |
| 1    | -1.53011700 | 5.09974000  | -0.49648600 | 1 | -5.73817000 | -1.97470000 | 2.30347100  | 1                 | 3.29311100  | 0.02926700  | 0.55110800  |
| 6    | 0.16834900  | 4.11396700  | -1.35167500 | 1 | -6.90581600 | -0.70798100 | 1.90998500  | 6                 | 2.66097400  | 3.17030400  | 1.69353800  |
| 1    | 0.63232800  | 5.03201500  | -1.72054800 | 1 | -5.25578800 | -0.24656000 | 2.34404600  | 1                 | 0.88602200  | 3.76070000  | 2.77909800  |
| 6    | 0.81407300  | 2.87640700  | -1.58020100 | 1 | -0.81815100 | -2.31245400 | -1.11978200 | 1                 | 4.28106500  | 2.26729300  | 0.58599600  |
| 6    | 2.04302800  | 2.75533000  | -2.27513500 | 8 | -3.62285600 | 1.14865300  | 0.81374800  | 1                 | 3.10186300  | 4.16989600  | 1.69333300  |
| 1    | 2.53030200  | 3.65553200  | -2.65881000 | 6 | 1.10319500  | -1.95777700 | 1.07509500  | 1                 | -4.20369200 | -2.63214600 | 0.29254600  |
| 6    | 2.60270400  | 1.50883100  | -2.45439000 | 6 | 0.79882700  | -0.70072900 | 1.64823600  |                   |             |             |             |
| 1    | 3.54872400  | 1.38074900  | -2.98360400 | 1 | -0.07474200 | -0.70127600 | 2.31383200  |                   |             |             |             |
| 6    | 1.94615800  | 0.38341100  | -1.93165400 | 1 | 0.46683400  | -2.78002600 | 1.43752300  | IM18 <sup>S</sup> |             |             |             |

|    |             |             |             |   |             |             |             |      |             |             |             |
|----|-------------|-------------|-------------|---|-------------|-------------|-------------|------|-------------|-------------|-------------|
| 27 | -0.38839700 | -0.48311100 | 0.41320200  | 6 | 3.64610100  | -1.06862400 | 3.59802900  | 1    | -5.63384500 | -2.07963800 | -1.85701200 |
| 7  | 1.31443400  | 0.51365100  | -0.18428900 | 1 | 3.38626900  | -2.10723100 | 3.85171100  | 1    | -7.11126700 | -1.20957200 | -0.04430300 |
| 7  | -0.97203100 | 1.36305600  | 0.78142200  | 1 | 3.19995200  | -0.43665100 | 4.37520500  | 6    | -0.57652300 | -1.69899200 | -1.30349900 |
| 7  | 3.58297100  | -1.54321000 | 1.13532900  | 1 | 4.73565000  | -0.95397500 | 3.68009400  | 6    | 0.48962400  | -2.11271300 | -2.16890600 |
| 6  | 1.08248700  | 1.87286700  | -0.32283800 | 6 | 5.03030500  | -1.27648700 | 0.80600200  | 6    | -1.24945100 | -0.46803100 | -1.63936600 |
| 6  | 1.90756000  | 2.83239300  | -0.91816500 | 1 | 5.58937200  | -1.52267500 | 1.72004100  | 6    | 0.94885000  | -1.29810000 | -3.17741700 |
| 1  | 2.84561900  | 2.51563500  | -1.36586100 | 1 | 5.10156900  | -0.19754500 | 0.62546500  | 1    | 0.94651300  | -3.09277600 | -1.99725700 |
| 6  | 1.53028400  | 4.18773900  | -0.94056500 | 6 | 5.52860500  | -2.04798200 | -0.38356200 | 6    | -0.74541800 | 0.33928100  | -2.67961900 |
| 1  | 2.20076000  | 4.90663300  | -1.41916300 | 1 | 5.31872900  | -3.12559400 | -0.31319200 | 1    | -2.23247800 | -0.23110800 | -1.23244400 |
| 6  | 0.35018000  | 4.63011200  | -0.37899900 | 1 | 6.61724000  | -1.93460700 | -0.45389800 | 6    | 0.35863600  | -0.03645500 | -3.41969900 |
| 1  | 0.07289600  | 5.68672600  | -0.39916300 | 1 | 5.09722800  | -1.65219700 | -1.31111600 | 1    | 1.77694900  | -1.63403300 | -3.80917000 |
| 6  | -0.52414000 | 3.69726000  | 0.22733500  | 1 | 0.21880400  | -0.83128800 | 1.75366300  | 1    | -1.25658000 | 1.27999700  | -2.90607600 |
| 6  | -1.76131400 | 4.04902100  | 0.82097900  | 8 | 3.53161600  | 0.50221000  | -0.93859000 | 1    | 0.74375400  | 0.60697500  | -4.21321200 |
| 1  | -2.07159800 | 5.09719900  | 0.82894000  | 6 | -1.82392300 | -1.83247600 | 0.87044700  | 1    | 3.53144400  | -2.50983500 | 1.47264700  |
| 6  | -2.55560200 | 3.06645600  | 1.36953000  | 6 | -0.81427500 | -2.34327500 | -0.04129500 |      |             |             |             |
| 1  | -3.51720600 | 3.30276800  | 1.82819400  | 1 | -0.19956900 | -3.22248300 | 0.19983500  |      |             |             |             |
| 6  | -2.12819800 | 1.72817300  | 1.32284300  | 1 | -1.67912200 | -2.16624700 | 1.90572100  | IM19 |             |             |             |
| 1  | -2.75495600 | 0.92397500  | 1.71750800  | 6 | -3.25629000 | -1.67504300 | 0.57716800  | 27   | -0.66126600 | -0.41521800 | -0.23561700 |
| 6  | -0.15719700 | 2.31969000  | 0.24267200  | 6 | -4.12091100 | -1.21680500 | 1.59383300  | 7    | -0.47088900 | 1.65998100  | -0.56530000 |
| 6  | 2.50557700  | -0.02516000 | -0.47711600 | 6 | -3.84572300 | -1.99179500 | -0.66347700 | 7    | -2.48226500 | 0.18718000  | 0.26795800  |
| 6  | 2.62425600  | -1.47711200 | -0.03640700 | 6 | -5.48455700 | -1.04746800 | 1.37720600  | 7    | 2.69198700  | 1.31316700  | 0.36033000  |
| 1  | 1.66281300  | -1.86371000 | 0.33361900  | 1 | -3.69876100 | -1.00463500 | 2.58223900  | 6    | -1.66462400 | 2.34386800  | -0.36099900 |
| 1  | 3.02787900  | -2.11772300 | -0.82847100 | 6 | -5.21039300 | -1.82063300 | -0.88265500 | 6    | -1.90974900 | 3.70727900  | -0.54496600 |
| 6  | 3.09442300  | -0.66237700 | 2.25970600  | 1 | -3.21800500 | -2.39944900 | -1.45990800 | 1    | -1.09437600 | 4.35226100  | -0.86304200 |
| 1  | 1.98970100  | -0.70695500 | 2.21695800  | 6 | -6.04073300 | -1.33965400 | 0.13033600  | 6    | -3.19242300 | 4.24100300  | -0.32209000 |
| 1  | 3.37570000  | 0.36150800  | 1.97710500  | 1 | -6.12271400 | -0.69251200 | 2.19131400  | 1    | -3.34887100 | 5.31090900  | -0.48364400 |

|   |             |             |             |   |             |             |             |                   |             |             |             |
|---|-------------|-------------|-------------|---|-------------|-------------|-------------|-------------------|-------------|-------------|-------------|
| 6 | -4.24744700 | 3.45326100  | 0.09102200  | 1 | 4.83709200  | 3.94786100  | -0.19526000 | 6                 | -3.39935900 | -4.25489900 | -0.19576800 |
| 1 | -5.23895800 | 3.87968100  | 0.26209800  | 1 | 3.47811700  | 3.56190100  | -1.26110400 | 1                 | -3.80152400 | -3.46473600 | -2.17076200 |
| 6 | -4.04743600 | 2.06763600  | 0.30019600  | 1 | 1.66780500  | -3.79211400 | 0.11773200  | 1                 | -2.67189500 | -4.90109200 | 1.73102000  |
| 6 | -5.06970900 | 1.18259300  | 0.72624300  | 8 | 0.94763200  | 3.52547100  | -0.71793700 | 1                 | -4.35841500 | -4.76945700 | -0.10637800 |
| 1 | -6.07571500 | 1.57150800  | 0.90329500  | 6 | 1.54337300  | -2.69171900 | 0.24687900  | 1                 | 3.39846800  | 0.57682200  | 0.20484300  |
| 6 | -4.77565200 | -0.15447000 | 0.90965500  | 6 | 0.37892100  | -2.17331400 | -0.57530800 |                   |             |             |             |
| 1 | -5.53804700 | -0.86418500 | 1.23622500  | 1 | 0.64061600  | -2.15373000 | -1.64740000 |                   |             |             |             |
| 6 | -3.47245000 | -0.61310900 | 0.67539500  | 1 | 1.34902700  | -2.58403300 | 1.33025900  | IM19 <sup>s</sup> |             |             |             |
| 1 | -3.21566400 | -1.66772500 | 0.81930000  | 6 | 2.88114900  | -2.06058300 | -0.03015900 | 27                | -0.44094900 | -0.31841200 | -0.33600400 |
| 6 | -2.75188200 | 1.51862500  | 0.07415000  | 6 | 3.83743100  | -1.94721400 | 0.99265600  | 7                 | 0.33295300  | 1.53490000  | -0.09313200 |
| 6 | 0.69240200  | 2.31165400  | -0.73907300 | 6 | 3.24238600  | -1.58267600 | -1.30064500 | 7                 | -1.93498900 | 0.63584600  | -0.94387300 |
| 6 | 1.86185100  | 1.35109600  | -0.89983000 | 6 | 5.08415000  | -1.35822900 | 0.77356100  | 7                 | 3.65650100  | 0.55045700  | 0.56413900  |
| 1 | 1.50298500  | 0.31965400  | -1.05125900 | 1 | 3.58749700  | -2.32519200 | 1.98936400  | 6                 | -0.71533600 | 2.44752300  | 0.00853700  |
| 1 | 2.52890700  | 1.65186000  | -1.71693600 | 6 | 4.48764900  | -0.99369600 | -1.53012900 | 6                 | -0.68179400 | 3.75842600  | 0.48767200  |
| 6 | 1.84915300  | 0.86575100  | 1.52256700  | 1 | 2.52998300  | -1.66183300 | -2.12456800 | 1                 | 0.25181800  | 4.15933500  | 0.87429500  |
| 1 | 1.36761300  | -0.07097600 | 1.17638000  | 6 | 5.41421700  | -0.86838300 | -0.49216100 | 6                 | -1.84732900 | 4.54742800  | 0.46200200  |
| 1 | 1.04301500  | 1.60673500  | 1.61915900  | 1 | 5.80214700  | -1.28360400 | 1.59493400  | 1                 | -1.79684500 | 5.56778200  | 0.85139300  |
| 6 | 2.61171200  | 0.70492700  | 2.80941300  | 1 | 4.73604800  | -0.62893000 | -2.53061600 | 6                 | -3.04031000 | 4.07104000  | -0.04294600 |
| 1 | 3.52047500  | 0.10006300  | 2.68599800  | 1 | 6.38904300  | -0.40829800 | -0.67157500 | 1                 | -3.93531200 | 4.69780400  | -0.06063300 |
| 1 | 1.97309600  | 0.18659100  | 3.53588700  | 6 | -0.88844000 | -2.91296700 | -0.42973900 | 6                 | -3.11677600 | 2.74976000  | -0.54820700 |
| 1 | 2.89273100  | 1.66591000  | 3.26035900  | 6 | -1.86268000 | -2.87614900 | -1.46346700 | 6                 | -4.28771900 | 2.17988800  | -1.10797600 |
| 6 | 3.43678800  | 2.58653100  | 0.65723400  | 6 | -1.22483800 | -3.67486300 | 0.71710800  | 1                 | -5.20548500 | 2.77055700  | -1.15636100 |
| 1 | 4.12179100  | 2.34113300  | 1.48106700  | 6 | -3.08331600 | -3.52397500 | -1.34816500 | 6                 | -4.23839200 | 0.88721400  | -1.59347500 |
| 1 | 2.68799300  | 3.30251800  | 1.02204200  | 1 | -1.63544100 | -2.31483300 | -2.37738600 | 1                 | -5.11499900 | 0.41921400  | -2.04553500 |
| 6 | 4.17685100  | 3.13829200  | -0.52957600 | 6 | -2.45371200 | -4.32338400 | 0.82784000  | 6                 | -3.05214200 | 0.15059300  | -1.50507800 |
| 1 | 4.80834200  | 2.38001100  | -1.01614300 | 1 | -0.50850500 | -3.75719200 | 1.53929400  | 1                 | -3.00170900 | -0.87439200 | -1.87559900 |

|   |             |             |             |      |             |             |             |   |             |             |             |
|---|-------------|-------------|-------------|------|-------------|-------------|-------------|---|-------------|-------------|-------------|
| 6 | -1.94866500 | 1.94005400  | -0.49717600 | 6    | 2.61773700  | -2.59537600 | 0.24890700  | 7 | -0.06116400 | 1.45203300  | -0.23224300 |
| 6 | 1.60667400  | 1.91206500  | 0.06810500  | 6    | 1.43717800  | -2.17084800 | -1.81399800 | 7 | -2.15031000 | 0.30505700  | 0.94471700  |
| 6 | 2.57411800  | 0.85460500  | -0.43821600 | 6    | 3.83518100  | -2.60218400 | -0.44216500 | 7 | 3.39781500  | 1.10919800  | -0.01056600 |
| 1 | 2.05507800  | -0.08454700 | -0.65385400 | 1    | 2.59914800  | -2.78483200 | 1.32797500  | 6 | -1.22942900 | 2.18837000  | -0.21731400 |
| 1 | 3.06798800  | 1.19756100  | -1.35756300 | 6    | 2.65090100  | -2.16933100 | -2.49933800 | 6 | -1.43555100 | 3.46404800  | -0.75246200 |
| 6 | 3.06521300  | 0.35171800  | 1.93029900  | 1    | 0.50573300  | -2.00730200 | -2.35861500 | 1 | -0.58746300 | 3.99748500  | -1.17614300 |
| 1 | 2.11871400  | -0.18614400 | 1.76264300  | 6    | 3.85996400  | -2.36438700 | -1.81942200 | 6 | -2.71322000 | 4.05173300  | -0.75013200 |
| 1 | 2.80237300  | 1.35359800  | 2.29539400  | 1    | 4.76503800  | -2.82266400 | 0.09380700  | 1 | -2.83062400 | 5.04646800  | -1.18835400 |
| 6 | 3.98102300  | -0.40049300 | 2.85698600  | 1    | 2.65609600  | -2.01304300 | -3.58077700 | 6 | -3.81190900 | 3.41044100  | -0.21555700 |
| 1 | 4.27040500  | -1.37751600 | 2.44289400  | 1    | 4.80637700  | -2.37135200 | -2.36579200 | 1 | -4.80024300 | 3.87591200  | -0.22172900 |
| 1 | 3.46293400  | -0.59141400 | 3.80448600  | 6    | -2.37605700 | -2.33094400 | 0.41994000  | 6 | -3.65486400 | 2.12826800  | 0.36142000  |
| 1 | 4.89687100  | 0.15326900  | 3.10320700  | 6    | -3.50253700 | -2.94768600 | -0.15777900 | 6 | -4.72087500 | 1.39333600  | 0.93391400  |
| 6 | 4.77110100  | 1.55757800  | 0.54135100  | 6    | -2.52684700 | -1.81255900 | 1.72297700  | 1 | -5.72655300 | 1.82219700  | 0.92680500  |
| 1 | 5.32060900  | 1.44882500  | 1.48582900  | 6    | -4.71778600 | -3.02853400 | 0.51744200  | 6 | -4.48120700 | 0.15606900  | 1.49038700  |
| 1 | 4.26843200  | 2.53542100  | 0.54566000  | 1    | -3.41287300 | -3.36695900 | -1.16556200 | 1 | -5.28374000 | -0.43611700 | 1.93294400  |
| 6 | 5.68216100  | 1.35176100  | -0.63890700 | 6    | -3.73821500 | -1.89945600 | 2.40131600  | 6 | -3.17028600 | -0.34703200 | 1.48553100  |
| 1 | 6.48695400  | 2.09617200  | -0.61856400 | 1    | -1.68183100 | -1.30392200 | 2.19822200  | 1 | -2.94563900 | -1.32187900 | 1.92968600  |
| 1 | 5.16171900  | 1.46943500  | -1.59873800 | 6    | -4.84663400 | -2.50294600 | 1.80295000  | 6 | -2.35993300 | 1.52565200  | 0.37464000  |
| 1 | 6.15348100  | 0.35754600  | -0.62967100 | 1    | -5.57302200 | -3.51042400 | 0.03562500  | 6 | 1.10893400  | 1.97465600  | -0.63008600 |
| 1 | 0.19416500  | -2.65043200 | 1.35397100  | 1    | -3.82310800 | -1.48034000 | 3.40760900  | 6 | 2.14805300  | 0.87781700  | -0.81147000 |
| 8 | 2.08450200  | 2.96766700  | 0.51965700  | 1    | -5.79922500 | -2.56250900 | 2.33428100  | 1 | 1.74141200  | -0.07553000 | -0.47168200 |
| 6 | 0.15547500  | -2.13864800 | 0.37234600  | 1    | 4.03468000  | -0.36640500 | 0.27624600  | 1 | 2.44065700  | 0.78794100  | -1.86665100 |
| 6 | -1.13682500 | -2.16436200 | -0.34169700 |      |             |             |             | 6 | 3.04743700  | 1.49705800  | 1.40349200  |
| 1 | -1.13389500 | -2.71599600 | -1.29378200 |      |             |             |             | 1 | 2.14388200  | 0.90612400  | 1.65902400  |
| 1 | 0.27083700  | -1.00142000 | 0.91733100  | IM20 |             |             |             | 1 | 2.75428700  | 2.55497600  | 1.35590500  |
| 6 | 1.39950600  | -2.35649000 | -0.41527000 | 27   | -0.21596300 | -0.38539100 | 0.90094300  | 6 | 4.17071400  | 1.23070300  | 2.36562000  |

|   |             |             |             |                   |             |             |             |   |             |             |             |
|---|-------------|-------------|-------------|-------------------|-------------|-------------|-------------|---|-------------|-------------|-------------|
| 1 | 4.44914500  | 0.16652600  | 2.37119300  | 1                 | 5.80104800  | -2.31833900 | -0.34685700 | 1 | -3.43010100 | 5.04120900  | 0.32636000  |
| 1 | 3.83700100  | 1.47765600  | 3.38071500  | 6                 | -1.86010900 | -2.18045300 | -0.81288000 | 6 | -2.76894400 | 3.07708700  | -0.31550000 |
| 1 | 5.07424500  | 1.82604800  | 2.17046200  | 6                 | -2.71068100 | -1.47807700 | -1.69242100 | 6 | -3.97899300 | 2.65835700  | -0.91985100 |
| 6 | 4.33548500  | 2.08108500  | -0.66721700 | 6                 | -2.43274800 | -3.22187200 | -0.05664500 | 1 | -4.83827700 | 3.33380400  | -0.92048700 |
| 1 | 5.03531400  | 2.41857900  | 0.10903300  | 6                 | -4.06037800 | -1.78754000 | -1.79896200 | 6 | -4.05333200 | 1.41050500  | -1.50004200 |
| 1 | 3.70274200  | 2.93302400  | -0.95541600 | 1                 | -2.29207000 | -0.65388400 | -2.27930400 | 1 | -4.96786300 | 1.06033300  | -1.98155900 |
| 6 | 5.07163500  | 1.46557600  | -1.82664200 | 6                 | -3.78699500 | -3.53294600 | -0.16564000 | 6 | -2.93196600 | 0.56753400  | -1.46109800 |
| 1 | 5.66763000  | 0.59330000  | -1.51947300 | 1                 | -1.80114900 | -3.80905800 | 0.61588000  | 1 | -2.97220500 | -0.43205000 | -1.90210000 |
| 1 | 5.76146500  | 2.20103300  | -2.25765100 | 6                 | -4.61273600 | -2.81880100 | -1.03322500 | 6 | -1.67530600 | 2.16256600  | -0.33202100 |
| 1 | 4.39828900  | 1.14702400  | -2.63360100 | 1                 | -4.69287500 | -1.21592800 | -2.48345500 | 6 | 1.84476000  | 1.77743200  | 0.44858600  |
| 1 | 0.05101000  | -2.86599500 | 1.11620600  | 1                 | -4.19960100 | -4.35248900 | 0.42925100  | 6 | 2.82514100  | 0.77523500  | -0.12757000 |
| 8 | 1.43715100  | 3.14678500  | -0.86623100 | 1                 | -5.67359900 | -3.06517300 | -1.11779900 | 1 | 2.34315500  | 0.09502500  | -0.82905300 |
| 6 | 0.43951700  | -2.22928500 | 0.30865900  | 1                 | 3.86945200  | 0.19182600  | 0.03895400  | 1 | 3.64238700  | 1.29952700  | -0.63901500 |
| 6 | -0.46482500 | -1.77675700 | -0.68442600 |                   |             |             |             | 6 | 2.40129500  | -0.50242300 | 1.95518700  |
| 1 | -0.04998800 | -1.27379900 | -1.56786700 |                   |             |             |             | 1 | 1.47659000  | -0.66756200 | 1.36978600  |
| 1 | 0.77384300  | -0.31346500 | 2.18879100  |                   |             |             |             | 1 | 2.21734200  | 0.37329400  | 2.59284600  |
| 6 | 1.89532300  | -2.32549800 | 0.11522400  | IM20 <sup>S</sup> |             |             |             | 6 | 2.81059000  | -1.72109600 | 2.73408800  |
| 6 | 2.76677100  | -2.37429300 | 1.22343900  | 27                | -0.31691000 | -0.29535600 | -0.40271100 | 1 | 3.01237900  | -2.57948500 | 2.07692000  |
| 6 | 2.48342600  | -2.32410900 | -1.16539000 | 7                 | 0.58838500  | 1.55861000  | 0.02787800  | 1 | 1.98566600  | -2.01573400 | 3.39470300  |
| 6 | 4.14770700  | -2.37690800 | 1.06159200  | 7                 | -1.78454600 | 0.91831000  | -0.88688300 | 1 | 3.69066600  | -1.56210000 | 3.37360000  |
| 1 | 2.33029100  | -2.36441800 | 2.22625100  | 7                 | 3.44325400  | -0.06929900 | 0.95781700  | 6 | 4.62391500  | 0.59789300  | 1.59819300  |
| 6 | 3.86868200  | -2.30045100 | -1.32975600 | 6                 | -0.40166700 | 2.51129400  | 0.22117100  | 1 | 4.79917400  | 0.09030000  | 2.55633500  |
| 1 | 1.83463100  | -2.32835300 | -2.04547100 | 6                 | -0.28036300 | 3.76943500  | 0.82073200  | 1 | 4.28928300  | 1.62415000  | 1.80912900  |
| 6 | 4.71543700  | -2.31627900 | -0.21912300 | 1                 | 0.67017400  | 4.05304200  | 1.26436900  | 6 | 5.84794900  | 0.54044900  | 0.72414000  |
| 1 | 4.79459000  | -2.42158000 | 1.94260800  | 6                 | -1.36995000 | 4.65892300  | 0.85032400  | 1 | 6.68484800  | 1.04226100  | 1.22417100  |
| 1 | 4.29176700  | -2.28989700 | -2.33865300 | 1                 | -1.23352000 | 5.63183900  | 1.33002000  | 1 | 5.70122500  | 1.04546300  | -0.23993100 |
|   |             |             |             | 6                 | -2.59258100 | 4.34038300  | 0.29656100  |   |             |             |             |



|   |             |             |             |                    |             |             |             |                    |             |             |             |
|---|-------------|-------------|-------------|--------------------|-------------|-------------|-------------|--------------------|-------------|-------------|-------------|
| 1 | 6.16133400  | -0.49422300 | 0.52054900  | 1                  | -5.68787000 | -3.15410200 | 0.19866900  | 6                  | 2.05901700  | -0.00029700 | -0.08908200 |
| 1 | 0.42833500  | -2.77787100 | 0.66207600  | 1                  | -3.10731000 | -2.78060800 | 3.62669400  | 6                  | -0.66050200 | -2.06540900 | 0.25324600  |
| 8 | 2.29987000  | 2.64803300  | 1.20674300  | 1                  | -5.36549500 | -3.24298200 | 2.67276300  | 6                  | -0.81725800 | -1.19755500 | 1.48042500  |
| 6 | 0.13199500  | -2.23296900 | -0.24460200 | 1                  | 3.75519600  | -0.92595800 | 0.47513100  | 1                  | -1.34743200 | -1.77243800 | 2.25806400  |
| 6 | -1.25255400 | -2.03476700 | -0.59781000 |                    |             |             |             | 1                  | 0.18027100  | -0.94904300 | 1.87905200  |
| 1 | -1.51490800 | -2.20824700 | -1.65652300 |                    |             |             |             | 6                  | -2.92328200 | -0.10548600 | 0.79302600  |
| 1 | -0.62357100 | -0.27876200 | 1.03080500  |                    |             |             |             | 1                  | -3.02243200 | -0.51279800 | -0.22544800 |
| 6 | 1.14807300  | -1.95458200 | -1.21337700 | Pre_1 <sup>d</sup> |             |             |             | 1                  | -3.31442600 | 0.91983300  | 0.72364200  |
| 6 | 2.50511100  | -2.37348100 | -1.04217500 | 27                 | -0.57824100 | 0.35594800  | -0.99768900 | 6                  | -3.73178300 | -0.96130600 | 1.74681100  |
| 6 | 0.85922500  | -1.18395800 | -2.38763400 | 7                  | 0.26408000  | -1.49352200 | -0.71381400 | 1                  | -3.45960300 | -2.02408700 | 1.67293100  |
| 6 | 3.49740500  | -1.99717400 | -1.93546400 | 1                  | 0.15369200  | -2.01980100 | -1.58804300 | 1                  | -4.79296100 | -0.89616000 | 1.47269900  |
| 1 | 2.73592700  | -3.05898500 | -0.21913800 | 7                  | 1.15144800  | 1.00134000  | -0.33697500 | 1                  | -3.64821700 | -0.66258000 | 2.80050900  |
| 6 | 1.88252200  | -0.77933100 | -3.24519900 | 7                  | -1.47217800 | 0.04264100  | 1.08138100  | 6                  | -1.14313800 | 1.18283800  | 1.95139300  |
| 1 | -0.17774900 | -0.93916300 | -2.64188600 | 6                  | 1.63108500  | -1.33022300 | -0.29181800 | 1                  | -1.44092100 | 2.08780900  | 1.39911900  |
| 6 | 3.20600000  | -1.16931500 | -3.03308900 | 6                  | 2.49288600  | -2.38939000 | -0.08354300 | 1                  | -0.04328400 | 1.22109600  | 2.01888000  |
| 1 | 4.51787900  | -2.37162800 | -1.79739000 | 1                  | 2.14408000  | -3.41185600 | -0.24680900 | 6                  | -1.73868800 | 1.17421000  | 3.34345600  |
| 1 | 1.63245400  | -0.16631100 | -4.11513500 | 6                  | 3.81599600  | -2.13943700 | 0.33419200  | 1                  | -2.83030200 | 1.29431800  | 3.32823900  |
| 1 | 3.99099100  | -0.87780200 | -3.73321900 | 1                  | 4.49367600  | -2.98034000 | 0.49252900  | 1                  | -1.33496000 | 2.01215100  | 3.92803600  |
| 6 | -2.35210400 | -2.36836200 | 0.31175200  | 6                  | 4.25675300  | -0.84872200 | 0.54298000  | 1                  | -1.50696000 | 0.25171700  | 3.89769100  |
| 6 | -3.63357300 | -2.64217400 | -0.20170700 | 1                  | 5.28360700  | -0.65989500 | 0.86442400  | 8                  | -1.27461500 | -3.06552300 | 0.01219000  |
| 6 | -2.19534800 | -2.42678200 | 1.71082500  | 6                  | 3.39397900  | 0.25576400  | 0.33470600  | 17                 | -1.46197300 | 2.39282600  | -1.25176000 |
| 6 | -4.70586800 | -2.94796900 | 0.63267100  | 6                  | 3.77330700  | 1.61021000  | 0.50282500  | 17                 | -1.88191100 | -0.66665000 | -2.51898400 |
| 1 | -3.78106100 | -2.62806500 | -1.28684400 | 1                  | 4.78822400  | 1.85146400  | 0.82656200  |                    |             |             |             |
| 6 | -3.26186300 | -2.74282100 | 2.54494500  | 6                  | 2.84898300  | 2.60004100  | 0.24105500  |                    |             |             |             |
| 1 | -1.21717500 | -2.20317500 | 2.14599400  | 1                  | 3.10738900  | 3.65410200  | 0.35333100  |                    |             |             |             |
| 6 | -4.52789300 | -3.00129800 | 2.01445000  | 6                  | 1.55130200  | 2.26365800  | -0.18005800 | Pre_1 <sup>a</sup> |             |             |             |
|   |             |             |             | 1                  | 0.79062200  | 3.01850000  | -0.40449800 | 27                 | -0.76394000 | 0.82778500  | -0.72175400 |

|   |             |             |             |                    |             |             |             |   |             |             |             |
|---|-------------|-------------|-------------|--------------------|-------------|-------------|-------------|---|-------------|-------------|-------------|
| 7 | 0.40778900  | -1.49870800 | -1.06899100 | 6                  | -3.79581800 | -1.59558000 | 1.01764900  | 1 | 3.91959000  | 3.64906500  | 0.45408600  |
| 1 | 0.34005600  | -1.50147900 | -2.09002700 | 1                  | -3.46497100 | -2.54900300 | 0.58449900  | 6 | 4.28722700  | 1.63210600  | -0.15612900 |
| 7 | 1.23409800  | 1.03585300  | -0.19998200 | 1                  | -4.83376100 | -1.44488400 | 0.69358900  | 1 | 5.34322900  | 1.79416600  | -0.38219200 |
| 7 | -1.52640100 | -0.38975200 | 0.95923000  | 1                  | -3.80632300 | -1.69356000 | 2.11129700  | 6 | 3.72713100  | 0.34496000  | -0.33379000 |
| 6 | 1.69111500  | -1.31416700 | -0.49310700 | 6                  | -1.31190800 | 0.34888100  | 2.22366500  | 6 | 4.43770100  | -0.78354300 | -0.80905400 |
| 6 | 2.55884100  | -2.38242400 | -0.34611600 | 1                  | -1.68269300 | 1.37058600  | 2.05744500  | 1 | 5.49585200  | -0.67975900 | -1.06215700 |
| 1 | 2.22410200  | -3.37374200 | -0.65957400 | 1                  | -0.21859400 | 0.44440200  | 2.34200900  | 6 | 3.79217900  | -1.99409100 | -0.95517800 |
| 6 | 3.85464300  | -2.20476900 | 0.17744200  | 6                  | -1.91698900 | -0.25168100 | 3.47374500  | 1 | 4.31648700  | -2.87352800 | -1.33147400 |
| 1 | 4.51613700  | -3.06711300 | 0.27914800  | 1                  | -3.01416300 | -0.20879500 | 3.46446200  | 6 | 2.43585000  | -2.10052600 | -0.60749800 |
| 6 | 4.28724700  | -0.95015800 | 0.54275700  | 1                  | -1.58530200 | 0.31515400  | 4.35399400  | 1 | 1.87538100  | -3.03258100 | -0.71615900 |
| 1 | 5.29493100  | -0.79826700 | 0.93650400  | 1                  | -1.61869200 | -1.29864700 | 3.63338100  | 6 | 2.35317300  | 0.15777800  | -0.01483200 |
| 6 | 3.43086200  | 0.17012200  | 0.41412200  | 8                  | -1.48328800 | -2.77963400 | -1.07172400 | 6 | -0.78538800 | 1.81922700  | 0.66620700  |
| 6 | 3.82485900  | 1.48084000  | 0.77528900  | 17                 | -1.66448300 | 2.81279400  | -0.09946400 | 6 | -2.22954700 | 1.31916000  | 0.64009600  |
| 1 | 4.83328800  | 1.64775700  | 1.16190600  | 17                 | -1.30933600 | 0.28669200  | -2.83919900 | 1 | -2.48437100 | 0.87280200  | 1.61109600  |
| 6 | 2.93318000  | 2.51875200  | 0.63530700  |                    |             |             |             | 1 | -2.87449400 | 2.18449300  | 0.45202600  |
| 1 | 3.20234800  | 3.54162400  | 0.90119200  |                    |             |             |             | 6 | -3.86980300 | -0.33838100 | -0.25671000 |
| 6 | 1.64009100  | 2.25114000  | 0.15181300  | Pre_2 <sup>d</sup> |             |             |             | 1 | -3.92952200 | -0.66548800 | 0.79117200  |
| 1 | 0.88648000  | 3.04180400  | 0.06464500  | 27                 | 0.00421900  | -1.11341000 | 0.63613500  | 1 | -3.82755200 | -1.25557400 | -0.86172300 |
| 6 | 2.10767800  | -0.01098000 | -0.09700800 | 7                  | 0.18342200  | 0.86434200  | 0.60549800  | 6 | -5.01489600 | 0.55206100  | -0.65391500 |
| 6 | -0.67391500 | -2.12549600 | -0.45690400 | 1                  | -1.88732900 | -0.53206200 | -0.15091500 | 1 | -5.02972400 | 1.49923100  | -0.09736900 |
| 6 | -0.86676500 | -1.70595100 | 0.98397900  | 7                  | 1.75304300  | -1.06263900 | -0.13547600 | 1 | -5.95862000 | 0.03796600  | -0.43377200 |
| 1 | -1.44644200 | -2.47193400 | 1.52287000  | 7                  | -2.50885500 | 0.27392500  | -0.38458700 | 1 | -5.01950900 | 0.78000500  | -1.72817400 |
| 1 | 0.09849800  | -1.58949800 | 1.50020800  | 6                  | 1.51933400  | 1.22867900  | 0.42961500  | 6 | -2.10584400 | 0.65734600  | -1.78284400 |
| 6 | -2.95469000 | -0.44134800 | 0.51750900  | 6                  | 2.11910600  | 2.47853100  | 0.59650600  | 1 | -2.58643100 | -0.07639600 | -2.44479200 |
| 1 | -2.95607500 | -0.45797500 | -0.58704100 | 1                  | 1.52101000  | 3.31692800  | 0.94056900  | 1 | -1.02689500 | 0.44902000  | -1.83577300 |
| 1 | -3.38019600 | 0.53434800  | 0.79526900  | 6                  | 3.48738800  | 2.65610200  | 0.30747900  | 6 | -2.40860100 | 2.08199900  | -2.17007100 |

|                    |             |             |             |    |             |             |             |       |             |             |             |
|--------------------|-------------|-------------|-------------|----|-------------|-------------|-------------|-------|-------------|-------------|-------------|
| 1                  | -3.47429200 | 2.33444600  | -2.09886600 | 6  | 3.38792400  | -1.55515700 | -0.02634300 | Pre_3 |             |             |             |
| 1                  | -2.10960800 | 2.23127900  | -3.21507800 | 1  | 3.23033100  | -2.63776500 | -0.03463200 | 27    | -0.46244100 | -1.93148200 | 0.00001900  |
| 1                  | -1.84464700 | 2.80598900  | -1.56705400 | 6  | 2.41892900  | 0.55808700  | -0.04241800 | 8     | 1.70227300  | 1.65181200  | 0.00004000  |
| 8                  | -0.62235800 | 3.03437800  | 0.71534300  | 6  | -1.17990300 | 1.10312400  | -0.11792400 | 7     | 0.03745600  | 0.02630900  | 0.00001900  |
| 17                 | -0.88157400 | -2.47344500 | -0.96200900 | 6  | -2.26211300 | 0.02699300  | -0.24538200 | 7     | -2.34318600 | -1.16054400 | -0.00006300 |
| 17                 | -1.59001100 | -1.40013100 | 2.18441000  | 1  | -2.29965300 | -0.36315700 | -1.27291400 | 7     | 3.69148100  | 0.09674700  | 0.00008200  |
|                    |             |             |             | 1  | -2.07881600 | -0.83835400 | 0.41207400  | 1     | 3.34929400  | 1.09726700  | 0.00007500  |
|                    |             |             |             | 6  | -4.63282000 | 0.52621800  | -0.88544300 | 6     | -1.07735600 | 0.87679500  | -0.00001800 |
|                    |             |             |             | 1  | -5.53997700 | 0.95667300  | -0.43692900 | 6     | -1.08205400 | 2.26913500  | -0.00001700 |
| Pre_2 <sup>a</sup> |             |             |             | 1  | -4.81024700 | -0.55358400 | -0.99939200 | 1     | -0.13766500 | 2.80658400  | 0.00001400  |
| 27                 | 0.33483100  | -1.41708200 | -0.08071800 | 6  | -4.30439000 | 1.19397200  | -2.19487700 | 6     | -2.29533400 | 2.98746100  | -0.00005600 |
| 8                  | -1.57464200 | 2.28242200  | -0.02940800 | 1  | -4.10168700 | 2.26557800  | -2.06288600 | 1     | -2.25192400 | 4.07841100  | -0.00005300 |
| 7                  | 0.04528400  | 0.59625400  | -0.12395800 | 1  | -5.15263600 | 1.09599000  | -2.88233600 | 6     | -3.51779600 | 2.35378700  | -0.00009600 |
| 7                  | 2.29960700  | -0.80285100 | -0.04681500 | 1  | -3.43361900 | 0.74511300  | -2.68924700 | 1     | -4.45034500 | 2.92083000  | -0.00012500 |
| 7                  | -3.54635500 | 0.69009700  | 0.12021700  | 6  | -3.98287800 | 0.34390900  | 1.51053900  | 6     | -3.56551300 | 0.94016100  | -0.00009900 |
| 6                  | 1.21218000  | 1.33885000  | -0.07519200 | 1  | -4.24734700 | -0.72455000 | 1.50053300  | 6     | -4.76897400 | 0.19717000  | -0.00013800 |
| 6                  | 1.33017800  | 2.72691500  | -0.06360500 | 1  | -4.90838600 | 0.91136900  | 1.68998800  | 1     | -5.72213100 | 0.73154200  | -0.00016800 |
| 1                  | 0.42485300  | 3.33065400  | -0.08380700 | 6  | -2.92794200 | 0.65038100  | 2.54108000  | 6     | -4.73749100 | -1.18144200 | -0.00013800 |
| 6                  | 2.59714000  | 3.34204100  | -0.02625500 | 1  | -2.62148100 | 1.70456200  | 2.50648200  | 1     | -5.65302600 | -1.77302600 | -0.00016800 |
| 1                  | 2.64757900  | 4.43364700  | -0.01929500 | 1  | -2.03602500 | 0.01529500  | 2.42759300  | 6     | -3.49228700 | -1.82717900 | -0.00009900 |
| 6                  | 3.76266600  | 2.60696400  | 0.00043400  | 1  | -3.33484000 | 0.44994500  | 3.53938200  | 1     | -3.42926000 | -2.91967700 | -0.00009800 |
| 1                  | 4.73963300  | 3.09455100  | 0.02780900  | 1  | -3.21698900 | 1.69685800  | 0.11973000  | 6     | -2.34192800 | 0.20739400  | -0.00006000 |
| 6                  | 3.69562000  | 1.19252700  | -0.00769600 | 17 | -0.46784000 | -2.22136100 | 1.87537100  | 6     | 1.29230700  | 0.48238400  | 0.00004300  |
| 6                  | 4.83585100  | 0.35484900  | 0.01554100  | 17 | -0.38422000 | -2.39405600 | -1.95510500 | 6     | 2.37811200  | -0.60923900 | 0.00008000  |
| 1                  | 5.82958500  | 0.80968900  | 0.04145700  |    |             |             |             | 1     | 2.30387800  | -1.26519400 | 0.87739900  |
| 6                  | 4.68517700  | -1.01483500 | 0.00429400  |    |             |             |             | 1     | 2.30390100  | -1.26523600 | -0.87721000 |
| 1                  | 5.54796300  | -1.68210800 | 0.01991700  |    |             |             |             |       |             |             |             |

|                    |             |             |             |   |             |             |             |    |             |             |             |
|--------------------|-------------|-------------|-------------|---|-------------|-------------|-------------|----|-------------|-------------|-------------|
| 6                  | 4.49311000  | -0.12221900 | 1.24771700  | 6 | 0.46593200  | 0.93691900  | 3.49434100  | 6  | -5.04293600 | -3.58313600 | 1.27454600  |
| 1                  | 5.44675800  | 0.40047600  | 1.09142300  | 1 | 0.12175800  | 1.70546200  | 4.18907400  | 1  | -5.34921200 | -2.78238100 | 1.96143100  |
| 1                  | 4.71965500  | -1.19757000 | 1.30010400  | 6 | 1.76066100  | 0.47674000  | 3.56763400  | 1  | -4.05055200 | -3.94043900 | 1.57820100  |
| 6                  | 3.79118800  | 0.38488700  | 2.47867000  | 1 | 2.45780700  | 0.87440100  | 4.30747300  | 1  | -5.73542700 | -4.41964500 | 1.42320300  |
| 1                  | 3.55913700  | 1.45557600  | 2.40448800  | 6 | 2.19752300  | -0.53897400 | 2.68277200  | 27 | 0.08929700  | -0.33472800 | -1.20254100 |
| 1                  | 4.44140000  | 0.24718300  | 3.35018000  | 6 | 3.50267700  | -1.08437000 | 2.71499100  | 8  | 0.33133500  | 3.45152500  | 0.57039500  |
| 1                  | 2.85715100  | -0.15200000 | 2.69003600  | 1 | 4.22014900  | -0.70643400 | 3.44731900  | 7  | 0.72264300  | 1.45009000  | -0.55322400 |
| 6                  | 4.49311200  | -0.12222700 | -1.24755100 | 6 | 3.85290400  | -2.08988700 | 1.83919000  | 7  | 1.95129700  | -0.53941900 | -1.75941700 |
| 1                  | 4.71966600  | -1.19757700 | -1.29992400 | 1 | 4.84744900  | -2.53642200 | 1.85185100  | 7  | -2.09635500 | 3.68257200  | -0.10633700 |
| 1                  | 5.44675600  | 0.40047800  | -1.09126300 | 6 | 2.89364300  | -2.55419400 | 0.92638700  | 6  | 2.12163700  | 1.45944700  | -0.46206700 |
| 6                  | 3.79118500  | 0.38485800  | -2.47851000 | 1 | 3.13012400  | -3.36658000 | 0.23166700  | 6  | 2.93639600  | 2.38129700  | 0.19079100  |
| 1                  | 2.85715500  | -0.15204300 | -2.68987100 | 6 | 1.29086000  | -1.05018000 | 1.70847400  | 1  | 2.48521700  | 3.20358400  | 0.74004000  |
| 1                  | 4.44140000  | 0.24715300  | -3.35001800 | 6 | -2.16640500 | -1.09877800 | 0.57432400  | 6  | 4.34126700  | 2.26229900  | 0.13889700  |
| 1                  | 3.55912000  | 1.45554500  | -2.40433700 | 6 | -2.77616100 | -2.20122500 | -0.28869000 | 1  | 4.94447500  | 3.00744000  | 0.66142800  |
| 1                  | 0.64485600  | -3.05113100 | 0.00004600  | 1 | -2.30248100 | -2.31417900 | -1.27196800 | 6  | 4.96392100  | 1.25111100  | -0.55983700 |
|                    |             |             |             | 1 | -2.62923700 | -3.15869100 | 0.23062600  | 1  | 6.05222600  | 1.18191100  | -0.60598100 |
|                    |             |             |             | 6 | -4.56536900 | -1.29827400 | -1.75037400 | 6  | 4.17795700  | 0.28648500  | -1.23360300 |
|                    |             |             |             | 1 | -5.64831500 | -1.11486900 | -1.74784000 | 6  | 4.71487300  | -0.78845900 | -1.97862500 |
| Pre_4 <sup>q</sup> |             |             |             | 1 | -4.36681700 | -2.05342300 | -2.52448600 | 1  | 5.79961300  | -0.88954600 | -2.06409400 |
| 27                 | 0.26450800  | -2.59650700 | -0.50191800 | 6 | -3.79432600 | -0.02668700 | -1.98432700 | 6  | 3.87410400  | -1.69389800 | -2.59472300 |
| 8                  | -2.94107700 | -0.41374600 | 1.24543200  | 1 | -4.00445300 | 0.72149300  | -1.20639700 | 1  | 4.26472300  | -2.52370400 | -3.18447000 |
| 7                  | -0.80802500 | -1.07060800 | 0.55811200  | 1 | -4.08489000 | 0.40238900  | -2.95097100 | 6  | 2.48746000  | -1.54516300 | -2.44933700 |
| 7                  | 1.66505300  | -2.05410300 | 0.85611200  | 1 | -2.70469400 | -0.19669600 | -2.02332000 | 1  | 1.79122200  | -2.25703700 | -2.90244000 |
| 7                  | -4.23691000 | -1.94026200 | -0.43461200 | 6 | -5.10134800 | -3.14558600 | -0.16249300 | 6  | 2.75705900  | 0.39051000  | -1.16119900 |
| 6                  | -0.04020800 | -0.53010700 | 1.61909800  | 1 | -4.77546900 | -3.92859200 | -0.86244100 | 6  | -0.01799700 | 2.44413300  | -0.05916600 |
| 6                  | -0.43421900 | 0.43882000  | 2.52945900  | 1 | -6.12004900 | -2.85511600 | -0.45282100 | 6  | -1.52511700 | 2.32613300  | -0.33675300 |
| 1                  | -1.45179100 | 0.82193500  | 2.49984500  |   |             |             |             |    |             |             |             |

|                    |             |             |             |   |             |             |             |    |             |             |             |
|--------------------|-------------|-------------|-------------|---|-------------|-------------|-------------|----|-------------|-------------|-------------|
| 1                  | -1.74375100 | 2.00105700  | -1.36392100 | 7 | 1.95706000  | -2.11797400 | 0.29763100  | 1  | -4.73226600 | 0.12833500  | -2.54678200 |
| 1                  | -1.98944200 | 1.61328700  | 0.36253000  | 7 | -4.03086900 | -2.29815200 | -0.21722900 | 1  | -3.12451200 | -0.27364500 | -1.93205100 |
| 6                  | -2.23764500 | 4.47728800  | -1.37660200 | 6 | 0.29468400  | -0.81219200 | 1.44876800  | 6  | -4.66578500 | -3.60577000 | 0.18669900  |
| 1                  | -2.64962100 | 5.45083900  | -1.07756200 | 6 | -0.03226800 | 0.02905600  | 2.50249200  | 1  | -4.42492100 | -4.32924000 | -0.60561200 |
| 1                  | -3.01209800 | 3.97117900  | -1.97374900 | 1 | -1.05391200 | 0.39074700  | 2.60683700  | 1  | -5.75051700 | -3.43612300 | 0.15222300  |
| 6                  | -0.94392500 | 4.63892800  | -2.12712200 | 6 | 0.94451000  | 0.41613600  | 3.44300000  | 6  | -4.22322900 | -4.06003400 | 1.54945200  |
| 1                  | -0.18027600 | 5.14702500  | -1.52506200 | 1 | 0.65362500  | 1.07842700  | 4.26057400  | 1  | -4.45466100 | -3.31823500 | 2.32590400  |
| 1                  | -1.12369700 | 5.25052300  | -3.01897800 | 6 | 2.24415400  | -0.02966000 | 3.35279700  | 1  | -3.15124800 | -4.29090000 | 1.59985300  |
| 1                  | -0.52624400 | 3.68342500  | -2.47313700 | 1 | 2.99306000  | 0.26979600  | 4.08855700  | 1  | -4.75598900 | -4.98153300 | 1.81129100  |
| 6                  | -3.34788800 | 3.73492900  | 0.71691000  | 6 | 2.61958300  | -0.89826500 | 2.29930600  | 27 | 0.03507300  | -0.07925900 | -1.38183800 |
| 1                  | -4.15100900 | 3.28380200  | 0.11483100  | 6 | 3.92355600  | -1.42814800 | 2.15303600  | 8  | -0.26199000 | 3.48844600  | 0.79247100  |
| 1                  | -3.58836600 | 4.80272300  | 0.81089000  | 1 | 4.69426900  | -1.15615400 | 2.87851900  | 7  | 0.44238300  | 1.63734700  | -0.43086200 |
| 6                  | -3.20506300 | 3.08682800  | 2.06790600  | 6 | 4.20560900  | -2.29076000 | 1.11520000  | 7  | 2.06659700  | 0.02784800  | -1.76441600 |
| 1                  | -3.19447500 | 1.98978900  | 2.01797900  | 1 | 5.19678900  | -2.72776300 | 0.99043100  | 7  | -2.68632300 | 3.43361400  | 0.06418500  |
| 1                  | -4.06133900 | 3.36580700  | 2.69309900  | 6 | 3.18797300  | -2.60645600 | 0.20155200  | 6  | 1.81773000  | 1.76972900  | -0.15630800 |
| 1                  | -2.30007800 | 3.42998000  | 2.59026000  | 1 | 3.38473900  | -3.27924100 | -0.63936100 | 6  | 2.42539200  | 2.62272400  | 0.75971800  |
| 1                  | -0.29044200 | -4.01906800 | -0.88198700 | 6 | 1.64055100  | -1.28143900 | 1.33577000  | 1  | 1.81685900  | 3.28732000  | 1.36682800  |
| 1                  | -1.30109200 | 4.11002700  | 0.44151700  | 6 | -1.90592100 | -1.36084000 | 0.56851800  | 6  | 3.82972500  | 2.64480100  | 0.90447700  |
| 1                  | -4.40621500 | -1.24031500 | 0.32022400  | 6 | -2.55017100 | -2.37635900 | -0.37270500 | 1  | 4.26290100  | 3.32898300  | 1.63703300  |
| 1                  | -0.27354800 | -1.74940200 | -1.91733000 | 1 | -2.25921600 | -2.22069200 | -1.42173100 | 6  | 4.65747600  | 1.85943100  | 0.13327400  |
|                    |             |             |             | 1 | -2.20097600 | -3.38632100 | -0.11719000 | 1  | 5.74334200  | 1.91593700  | 0.23144200  |
|                    |             |             |             | 6 | -4.70256800 | -1.68083900 | -1.40673200 | 6  | 4.08775600  | 0.97763300  | -0.81693900 |
|                    |             |             |             | 1 | -5.78002500 | -1.68182700 | -1.19414000 | 6  | 4.84043200  | 0.14822000  | -1.68199400 |
| Pre_4 <sup>s</sup> |             |             |             | 1 | -4.53920700 | -2.36332200 | -2.25299300 | 1  | 5.93196000  | 0.18685800  | -1.64130800 |
| 27                 | 0.43367500  | -2.38581400 | -1.03993600 | 6 | -4.19813900 | -0.29027400 | -1.68517100 | 6  | 4.20026500  | -0.69245300 | -2.57052000 |
| 8                  | -2.64238300 | -0.76683200 | 1.36344600  | 1 | -4.36957100 | 0.37560700  | -0.82666100 | 1  | 4.76119300  | -1.32443700 | -3.26008400 |
| 7                  | -0.56391600 | -1.27430300 | 0.42836300  |   |             |             |             |    |             |             |             |

|   |             |             |             |                    |             |             |             |  |    |             |             |             |
|---|-------------|-------------|-------------|--------------------|-------------|-------------|-------------|--|----|-------------|-------------|-------------|
| 6 | 2.79775300  | -0.74034200 | -2.56153100 |                    |             |             |             |  | 6  | 2.58237700  | -4.00243600 | 0.65409300  |
| 1 | 2.24917300  | -1.42700200 | -3.21734200 | Pre_5 <sup>a</sup> |             |             |             |  | 1  | 3.30845400  | -4.56978300 | 1.25210000  |
| 6 | 2.66741000  | 0.91360500  | -0.92587600 | 27                 | 0.04325100  | -0.27554100 | -1.80901100 |  | 1  | 2.11688000  | -4.71441400 | -0.04290600 |
| 6 | -0.44834900 | 2.50094300  | 0.07384500  | 8                  | 3.44319800  | -0.51180100 | 0.32509600  |  | 6  | 1.57505600  | -3.31894800 | 1.53913300  |
| 6 | -1.91334100 | 2.20908800  | -0.28716900 | 7                  | 1.92095900  | 0.10622800  | -1.32733500 |  | 1  | 2.05538400  | -2.59752000 | 2.21555300  |
| 1 | -2.05458900 | 1.96716400  | -1.35102600 | 7                  | -0.26787400 | 1.68519600  | -1.60648800 |  | 1  | 1.06359300  | -4.06377600 | 2.16059500  |
| 1 | -2.27990200 | 1.36450500  | 0.31695900  | 7                  | 3.37652700  | -3.03650300 | -0.17081200 |  | 1  | 0.78687600  | -2.78553600 | 0.96980400  |
| 6 | -3.00197400 | 4.29150600  | -1.12991200 | 6                  | 2.10511000  | 1.49744600  | -1.26271800 |  | 6  | 4.53879600  | -3.69773700 | -0.86573600 |
| 1 | -3.57377800 | 5.14624600  | -0.74398200 | 6                  | 3.32954500  | 2.13256000  | -1.08899800 |  | 1  | 4.11194900  | -4.37420700 | -1.62081100 |
| 1 | -3.68624000 | 3.70628600  | -1.76365200 | 1                  | 4.22449800  | 1.53352100  | -0.91862600 |  | 1  | 5.02502600  | -4.32584600 | -0.10694300 |
| 6 | -1.77136700 | 4.74416300  | -1.86716500 | 6                  | 3.43515900  | 3.53568100  | -1.15748700 |  | 6  | 5.50053700  | -2.70009600 | -1.44977000 |
| 1 | -1.09776400 | 5.32351900  | -1.22254700 | 1                  | 4.41888400  | 3.99498400  | -1.04130700 |  | 1  | 5.90971300  | -2.02837900 | -0.68360500 |
| 1 | -2.06853500 | 5.39228300  | -2.69986500 | 6                  | 2.32880700  | 4.33028000  | -1.37333300 |  | 1  | 5.05535900  | -2.08683400 | -2.24437400 |
| 1 | -1.19891800 | 3.91198800  | -2.29970900 | 1                  | 2.41802200  | 5.41710200  | -1.42395600 |  | 1  | 6.34423500  | -3.23555800 | -1.90012100 |
| 6 | -3.88989300 | 3.20781200  | 0.93109500  | 6                  | 1.05464000  | 3.73265800  | -1.52209600 |  | 27 | -1.03475200 | -1.39679800 | -0.23018400 |
| 1 | -4.62077100 | 2.64611800  | 0.33026100  | 6                  | -0.14197300 | 4.47172900  | -1.68716900 |  | 8  | -1.41100000 | 1.43541100  | 2.77432200  |
| 1 | -4.32160100 | 4.20443500  | 1.09717800  | 1                  | -0.09349600 | 5.56234500  | -1.73101200 |  | 7  | -1.74261900 | -0.08085800 | 1.03123700  |
| 6 | -3.55876000 | 2.53284700  | 2.23457800  | 6                  | -1.35190700 | 3.81687000  | -1.78075300 |  | 7  | -2.88318600 | -1.69243100 | -0.80144400 |
| 1 | -3.27622400 | 1.47778600  | 2.11779300  | 1                  | -2.28682100 | 4.36547600  | -1.89702900 |  | 7  | 1.12416500  | 1.06886000  | 2.95191100  |
| 1 | -4.44126400 | 2.55524400  | 2.88484100  | 6                  | -1.37063500 | 2.41340700  | -1.74106400 |  | 6  | -3.13646300 | 0.00616500  | 0.89754200  |
| 1 | -2.75370100 | 3.05717200  | 2.76885700  | 1                  | -2.31262800 | 1.86291200  | -1.82854700 |  | 6  | -3.98814700 | 0.84794400  | 1.60650700  |
| 1 | -0.19588500 | -3.78942700 | -1.45802300 | 6                  | 0.94552600  | 2.31056600  | -1.47421100 |  | 1  | -3.57225500 | 1.51203800  | 2.36060000  |
| 1 | -1.95630600 | 3.93923200  | 0.63423600  | 6                  | 2.67252900  | -0.74003600 | -0.62221500 |  | 6  | -5.37788300 | 0.84012000  | 1.37037800  |
| 1 | -4.12149200 | -1.63722800 | 0.58719500  | 6                  | 2.53723900  | -2.19945900 | -1.07154700 |  | 1  | -6.01007300 | 1.51271200  | 1.95308400  |
| 1 | -0.29645700 | -1.38868700 | -2.38520700 | 1                  | 1.48178000  | -2.51557700 | -1.02702200 |  | 6  | -5.94665700 | 0.00413800  | 0.43631000  |
|   |             |             |             | 1                  | 2.86855500  | -2.31945400 | -2.11143900 |  | 1  | -7.02462900 | -0.00339200 | 0.26585900  |

|   |             |             |             |                    |             |             |             |    |             |             |             |
|---|-------------|-------------|-------------|--------------------|-------------|-------------|-------------|----|-------------|-------------|-------------|
| 6 | -5.12268400 | -0.86867600 | -0.31362200 | 1                  | 0.30568100  | 1.58200800  | 3.36898100  | 6  | 2.76032200  | -1.97914500 | -1.29426800 |
| 6 | -5.62839800 | -1.76211600 | -1.28641000 | 1                  | 3.76719900  | -2.29127200 | 0.46191700  | 1  | 1.71639200  | -2.32145000 | -1.39868800 |
| 1 | -6.70390300 | -1.78859900 | -1.47642900 |                    |             |             |             | 1  | 3.17411600  | -1.89098600 | -2.30722100 |
| 6 | -4.77024700 | -2.58786500 | -1.98189000 |                    |             |             |             | 6  | 2.74544000  | -4.09710800 | 0.03187500  |
| 1 | -5.13629800 | -3.28651800 | -2.73441700 | Pre_5 <sup>S</sup> |             |             |             | 1  | 3.44771000  | -4.76051100 | 0.55445800  |
| 6 | -3.39707100 | -2.51651000 | -1.71262300 | 27                 | 0.25624700  | -0.08589500 | -1.84490900 | 1  | 2.36198400  | -4.65403700 | -0.83515900 |
| 1 | -2.69070900 | -3.14857700 | -2.25800900 | 8                  | 3.46493500  | -0.57049000 | 0.48078300  | 6  | 1.64833400  | -3.63546700 | 0.95311500  |
| 6 | -3.71387400 | -0.86440600 | -0.08471500 | 7                  | 2.09695500  | 0.32372700  | -1.18097900 | 1  | 2.05047600  | -3.06484800 | 1.80245600  |
| 6 | -1.03241700 | 0.64955300  | 1.90044300  | 7                  | 0.00592100  | 1.90986500  | -1.68683500 | 1  | 1.12191400  | -4.50558100 | 1.36328600  |
| 6 | 0.48263900  | 0.49501900  | 1.73845200  | 7                  | 3.55917400  | -2.95840300 | -0.50460700 | 1  | 0.89267800  | -3.01495200 | 0.44030400  |
| 1 | 0.80671400  | -0.54634200 | 1.59269900  | 6                  | 2.25353600  | 1.68590100  | -0.89189600 | 6  | 4.80558800  | -3.42682600 | -1.21045400 |
| 1 | 0.81533200  | 1.05640500  | 0.85469800  | 6                  | 3.40558200  | 2.29208500  | -0.40426900 | 1  | 4.47505700  | -3.94380800 | -2.12328600 |
| 6 | 1.55572900  | 0.02114400  | 3.93295100  | 1                  | 4.26752600  | 1.67789900  | -0.14209400 | 1  | 5.25637200  | -4.18438100 | -0.55508900 |
| 1 | 1.98191700  | 0.56049200  | 4.78982200  | 6                  | 3.48359000  | 3.69386800  | -0.27257900 | 6  | 5.76393400  | -2.30192600 | -1.48868900 |
| 1 | 2.38507800  | -0.52252400 | 3.45366400  | 1                  | 4.41350600  | 4.13605100  | 0.09092000  | 1  | 6.07925500  | -1.79486900 | -0.56714700 |
| 6 | 0.42628300  | -0.87627700 | 4.36427600  | 6                  | 2.42101600  | 4.50924000  | -0.59986100 | 1  | 5.35554500  | -1.54841700 | -2.17510500 |
| 1 | -0.39021500 | -0.30837000 | 4.82928200  | 1                  | 2.49149800  | 5.59366100  | -0.49656000 | 1  | 6.66495300  | -2.70628100 | -1.96412000 |
| 1 | 0.79325600  | -1.59084900 | 5.11074700  | 6                  | 1.21866900  | 3.93498000  | -1.07930200 | 27 | -1.20550200 | -1.25822900 | -0.56870200 |
| 1 | -0.00117600 | -1.46025300 | 3.53641900  | 6                  | 0.06705900  | 4.68605000  | -1.41709200 | 8  | -1.52841200 | 0.78304000  | 3.03162600  |
| 6 | 2.21556600  | 2.05526500  | 2.64382000  | 1                  | 0.09128200  | 5.77409800  | -1.32057300 | 7  | -1.91772500 | -0.30665900 | 1.00916400  |
| 1 | 2.90619400  | 1.55233300  | 1.94865400  | 6                  | -1.07092700 | 4.04459000  | -1.85926200 | 7  | -3.16207800 | -1.34580500 | -1.11798900 |
| 1 | 2.75433300  | 2.22474500  | 3.58584600  | 1                  | -1.97108100 | 4.60136200  | -2.12048200 | 7  | 0.99941600  | 0.49490900  | 3.05616200  |
| 6 | 1.65563600  | 3.33817700  | 2.09488500  | 6                  | -1.06007500 | 2.64552800  | -1.97982700 | 6  | -3.32052600 | -0.18628500 | 0.97878900  |
| 1 | 1.09916100  | 3.18632300  | 1.15867900  | 1                  | -1.94600300 | 2.10597900  | -2.32960800 | 6  | -4.13175200 | 0.41737800  | 1.93489500  |
| 1 | 2.47330900  | 4.03430600  | 1.87478000  | 6                  | 1.14220500  | 2.51958200  | -1.22814400 | 1  | -3.68145900 | 0.85520500  | 2.82152600  |
| 1 | 0.98504300  | 3.83178100  | 2.81160800  | 6                  | 2.80729900  | -0.63090200 | -0.57005900 | 6  | -5.53249100 | 0.46232300  | 1.77374700  |

|   |             |             |             |                     |             |             |             |    |             |             |             |
|---|-------------|-------------|-------------|---------------------|-------------|-------------|-------------|----|-------------|-------------|-------------|
| 1 | -6.12960500 | 0.94276700  | 2.55102600  | 1                   | 0.92069800  | 2.87929300  | 1.56716100  | 1  | 3.54656900  | -3.27237200 | -0.04386300 |
| 6 | -6.15355100 | -0.08375000 | 0.67388300  | 1                   | 2.17673900  | 3.67381700  | 2.51850500  | 6  | 1.61423200  | -1.11563200 | 1.55861000  |
| 1 | -7.23845500 | -0.04798800 | 0.56034900  | 1                   | 0.65295100  | 3.21777700  | 3.29376700  | 6  | -1.89740600 | -1.40267500 | 0.62319300  |
| 6 | -5.37110300 | -0.70708100 | -0.32729900 | 1                   | 0.16829900  | 0.87524500  | 3.57991000  | 6  | -2.48040800 | -2.59830700 | -0.12596000 |
| 6 | -5.91973000 | -1.29507500 | -1.49008600 | 1                   | 3.86137400  | -2.35495300 | 0.29961900  | 1  | -2.00506300 | -2.77274700 | -1.09966500 |
| 1 | -7.00256200 | -1.27586800 | -1.63519000 |                     |             |             |             | 1  | -2.30596300 | -3.49859200 | 0.47983100  |
| 6 | -5.09570200 | -1.88529500 | -2.42663700 |                     |             |             |             | 6  | -4.30545700 | -1.89734300 | -1.64954300 |
| 1 | -5.49769500 | -2.34516200 | -3.32962700 |                     |             |             |             | 1  | -5.39927300 | -1.79944700 | -1.67409500 |
| 6 | -3.71249800 | -1.88737200 | -2.19923600 | Pre_TS <sup>a</sup> |             |             |             | 1  | -4.03702300 | -2.69701700 | -2.35474700 |
| 1 | -3.02765000 | -2.34297200 | -2.92128500 | 27                  | 0.66410500  | -2.35845500 | -0.76787600 | 6  | -3.63636300 | -0.59096200 | -1.98100600 |
| 6 | -3.95332600 | -0.75493200 | -0.17174900 | 8                   | -2.69380300 | -0.67562300 | 1.23127900  | 1  | -3.94176100 | 0.20452500  | -1.28655100 |
| 6 | -1.17270100 | 0.21212000  | 1.99604500  | 7                   | -0.54980000 | -1.34975900 | 0.57425800  | 1  | -3.92166900 | -0.28070400 | -2.99360200 |
| 6 | 0.34421600  | 0.12224400  | 1.77219800  | 7                   | 2.01821900  | -2.08091200 | 0.67049600  | 1  | -2.53153900 | -0.66170100 | -1.96891900 |
| 1 | 0.68851600  | -0.86993400 | 1.44653800  | 7                   | -3.94909900 | -2.39723900 | -0.28028300 | 6  | -4.77769700 | -3.58880700 | 0.12545800  |
| 1 | 0.64635400  | 0.83481300  | 0.99046000  | 6                   | 0.24530100  | -0.69749800 | 1.54244400  | 1  | -4.44135300 | -4.43205000 | -0.49518600 |
| 6 | 1.51363700  | -0.69128900 | 3.81433900  | 6                   | -0.16186200 | 0.27417900  | 2.44481800  | 1  | -5.80750800 | -3.35620700 | -0.17739800 |
| 1 | 1.95814800  | -0.29507700 | 4.73747200  | 1                   | -1.19997200 | 0.60047100  | 2.44937200  | 6  | -4.69150100 | -3.87339100 | 1.59913600  |
| 1 | 2.33917600  | -1.10403700 | 3.21395900  | 6                   | 0.75364100  | 0.85006000  | 3.34914700  | 1  | -5.01113000 | -3.01323600 | 2.20323300  |
| 6 | 0.43634700  | -1.69765500 | 4.12137600  | 1                   | 0.39937800  | 1.61981000  | 4.03768200  | 1  | -3.68642700 | -4.16984200 | 1.92623300  |
| 1 | -0.37184300 | -1.25973700 | 4.72161100  | 6                   | 2.07392500  | 0.46136700  | 3.37602200  | 1  | -5.35928700 | -4.70741000 | 1.84409500  |
| 1 | 0.86341700  | -2.52345000 | 4.70297200  | 1                   | 2.77969400  | 0.91400700  | 4.07517600  | 27 | -0.04462000 | -0.23873900 | -1.29479500 |
| 1 | -0.01608300 | -2.13493500 | 3.21964100  | 6                   | 2.53155000  | -0.54011700 | 2.48471400  | 8  | -0.21522500 | 3.51861000  | 0.61620800  |
| 6 | 2.02773500  | 1.58119400  | 2.92292000  | 6                   | 3.86799900  | -1.00252200 | 2.45772100  | 7  | 0.38719000  | 1.60337700  | -0.57275400 |
| 1 | 2.76355600  | 1.22930800  | 2.18257600  | 1                   | 4.59327900  | -0.57597200 | 3.15494100  | 7  | 1.90140600  | -0.21632500 | -1.83003300 |
| 1 | 2.53498300  | 1.63954200  | 3.89553400  | 6                   | 4.24068800  | -1.98824100 | 1.56898700  | 7  | -2.66120200 | 3.49480500  | 0.00124500  |
| 6 | 1.40221100  | 2.89884300  | 2.55602800  | 1                   | 5.26068200  | -2.37238000 | 1.53787100  | 6  | 1.77293600  | 1.69938300  | -0.38421100 |
|   |             |             |             | 6                   | 3.28033500  | -2.49927700 | 0.68326600  |    |             |             |             |



|   |             |             |             |    |             |             |             |    |             |             |             |
|---|-------------|-------------|-------------|----|-------------|-------------|-------------|----|-------------|-------------|-------------|
| 6 | 2.45542600  | 2.62260800  | 0.40615100  | 1  | -4.59069600 | 2.72791300  | 0.34507400  | 6  | 3.96714500  | -0.86593300 | 2.47045700  |
| 1 | 1.89208700  | 3.36682500  | 0.96266100  | 1  | -4.25409600 | 4.29811900  | 1.07553000  | 1  | 4.65624700  | -0.46168100 | 3.21596500  |
| 6 | 3.86277400  | 2.61360300  | 0.48595900  | 6  | -3.46824600 | 2.63715300  | 2.21263200  | 6  | 4.39800600  | -1.78251000 | 1.53583800  |
| 1 | 4.35143900  | 3.35616000  | 1.12048400  | 1  | -3.21447600 | 1.57467800  | 2.10090900  | 1  | 5.42982900  | -2.13483200 | 1.51611600  |
| 6 | 4.62710800  | 1.72160200  | -0.23254300 | 1  | -4.32442400 | 2.68827900  | 2.89568900  | 6  | 3.48440300  | -2.25643100 | 0.58200700  |
| 1 | 5.71777300  | 1.74700000  | -0.19203800 | 1  | -2.63219800 | 3.15282400  | 2.70663000  | 1  | 3.80438100  | -2.96116900 | -0.19179100 |
| 6 | 3.98551300  | 0.76812400  | -1.05711700 | 1  | 0.28731100  | -3.36641500 | -1.86243500 | 6  | 1.74325100  | -1.00330100 | 1.49970700  |
| 6 | 4.68551500  | -0.16421500 | -1.85785400 | 1  | -1.88830900 | 3.98043700  | 0.53779200  | 6  | -1.72546500 | -1.49654800 | 0.59903400  |
| 1 | 5.77833200  | -0.14974400 | -1.85945500 | 1  | -4.12462200 | -1.62736600 | 0.40411700  | 6  | -2.28786800 | -2.55779700 | -0.34873700 |
| 6 | 3.99274800  | -1.06924300 | -2.63582000 | 1  | -0.18732600 | -1.95432300 | -2.02465900 | 1  | -2.06107100 | -2.30774900 | -1.39562200 |
| 1 | 4.50993100  | -1.78100600 | -3.28019200 |    |             |             |             | 1  | -1.84229800 | -3.53901900 | -0.13917900 |
| 6 | 2.59228900  | -1.07790100 | -2.57494600 |    |             |             |             | 6  | -4.53354500 | -2.05199800 | -1.29954100 |
| 1 | 2.00959800  | -1.81222600 | -3.14145300 |    |             |             |             | 1  | -5.59748100 | -2.19538600 | -1.06639300 |
| 6 | 2.55756300  | 0.73747700  | -1.10154700 | 27 | 0.86566800  | -2.17295600 | -0.90806400 | 1  | -4.30852400 | -2.67552400 | -2.17691600 |
| 6 | -0.44846600 | 2.50841100  | -0.06451000 | 8  | -2.52423700 | -0.96343800 | 1.38101400  | 6  | -4.20882900 | -0.60022400 | -1.52576000 |
| 6 | -1.93205600 | 2.25240900  | -0.37700800 | 7  | -0.39988700 | -1.29734900 | 0.47525600  | 1  | -4.45535600 | 0.00736900  | -0.64231600 |
| 1 | -2.10584700 | 2.02490100  | -1.43858100 | 7  | 2.20846800  | -1.88204000 | 0.55738300  | 1  | -4.79741500 | -0.22088400 | -2.36994300 |
| 1 | -2.30382600 | 1.41018200  | 0.22798800  | 7  | -3.76320400 | -2.62785700 | -0.14741000 | 1  | -3.14269900 | -0.44187500 | -1.77338800 |
| 6 | -2.99790800 | 4.36345700  | -1.17806100 | 6  | 0.35662700  | -0.65334700 | 1.47773500  | 6  | -4.26066900 | -3.98980300 | 0.25864500  |
| 1 | -3.52760100 | 5.23464300  | -0.76888300 | 6  | -0.10606500 | 0.26421600  | 2.41277700  | 1  | -3.99390000 | -4.68031800 | -0.55479800 |
| 1 | -3.72415700 | 3.80250900  | -1.78620000 | 1  | -1.15603300 | 0.54775300  | 2.41493200  | 1  | -5.35644400 | -3.91725100 | 0.27294300  |
| 6 | -1.78410800 | 4.78187500  | -1.96238300 | 6  | 0.76603300  | 0.83160400  | 3.36287700  | 6  | -3.72363700 | -4.42100300 | 1.59529200  |
| 1 | -1.06928100 | 5.33849700  | -1.34295400 | 1  | 0.36589200  | 1.55253100  | 4.07852600  | 1  | -3.98181400 | -3.70800700 | 2.39004700  |
| 1 | -2.09464300 | 5.44003300  | -2.78223100 | 6  | 2.09803000  | 0.48550500  | 3.41192900  | 1  | -2.63484500 | -4.56158200 | 1.59938200  |
| 1 | -1.25294100 | 3.93375700  | -2.41611400 | 1  | 2.76436600  | 0.91543600  | 4.16224100  | 1  | -4.16670300 | -5.38605000 | 1.86714100  |
| 6 | -3.83549000 | 3.29574100  | 0.91019000  | 6  | 2.61568000  | -0.44575200 | 2.48049500  | 27 | -0.19436200 | -0.06569900 | -1.59723400 |

|   |             |             |             |                     |             |             |             |   |             |             |             |
|---|-------------|-------------|-------------|---------------------|-------------|-------------|-------------|---|-------------|-------------|-------------|
| 8 | -0.43839700 | 3.39653000  | 0.74467600  | 6                   | -2.00996700 | 4.71777300  | -1.79270700 | 6 | 2.87577100  | 3.08023500  | 0.20953800  |
| 7 | 0.27105600  | 1.63391800  | -0.60590500 | 1                   | -1.32636300 | 5.27003800  | -1.13537700 | 1 | 3.11956200  | 4.13618500  | 0.34467100  |
| 7 | 1.85798200  | -0.08670500 | -1.87833000 | 1                   | -2.32986600 | 5.40298400  | -2.58642500 | 6 | 3.85241900  | 2.20160100  | -0.21226600 |
| 7 | -2.88398500 | 3.30518200  | 0.08921600  | 1                   | -1.44286600 | 3.91107000  | -2.27736200 | 1 | 4.86887700  | 2.54630200  | -0.41352000 |
| 6 | 1.64772600  | 1.77422900  | -0.38407600 | 6                   | -4.08118800 | 2.99908700  | 0.93761800  | 6 | 3.54518000  | 0.82912700  | -0.37251300 |
| 6 | 2.28609700  | 2.70159200  | 0.43754000  | 1                   | -4.78833900 | 2.43979300  | 0.30642600  | 6 | 4.47495700  | -0.15858500 | -0.77836500 |
| 1 | 1.69276500  | 3.42891800  | 0.98497300  | 1                   | -4.54904800 | 3.97043600  | 1.14876300  | 1 | 5.50321000  | 0.13300100  | -1.00548100 |
| 6 | 3.69034800  | 2.71303300  | 0.56530700  | 6                   | -3.73414700 | 2.27337300  | 2.20982900  | 6 | 4.07057800  | -1.47287700 | -0.87588400 |
| 1 | 4.14396600  | 3.45778600  | 1.22278900  | 1                   | -3.40790400 | 1.23688700  | 2.04539000  | 1 | 4.76381000  | -2.25539400 | -1.18746600 |
| 6 | 4.49515600  | 1.83385600  | -0.12530900 | 1                   | -4.62141400 | 2.22992200  | 2.85247300  | 6 | 2.74707700  | -1.82357400 | -0.56072300 |
| 1 | 5.58253400  | 1.86925100  | -0.03571000 | 1                   | -2.95390800 | 2.80103200  | 2.77693700  | 1 | 2.38244500  | -2.85089800 | -0.63283800 |
| 6 | 3.89853400  | 0.88273000  | -0.98465700 | 1                   | 0.13987200  | -3.00770300 | -2.10853500 | 6 | 2.21964800  | 0.39481000  | -0.09032800 |
| 6 | 4.63709900  | -0.03717300 | -1.76671500 | 1                   | -2.16013400 | 3.79386600  | 0.68062000  | 6 | -1.00655500 | 1.42086600  | 1.29844200  |
| 1 | 5.72897900  | -0.01818500 | -1.71862200 | 1                   | -3.88230100 | -1.98086200 | 0.66799200  | 6 | -2.40266400 | 1.23448000  | 0.71258100  |
| 6 | 3.98810400  | -0.93023600 | -2.59470600 | 1                   | -0.16277200 | -2.05468200 | -2.24635900 | 1 | -2.91478700 | 0.45851200  | 1.29412500  |
| 1 | 4.54039500  | -1.62656800 | -3.22675400 |                     |             |             |             | 1 | -2.96347000 | 2.17383600  | 0.82524500  |
| 6 | 2.58565400  | -0.93231800 | -2.61342500 |                     |             |             |             | 6 | -2.91090000 | -0.42227000 | -1.13489500 |
| 1 | 2.02900200  | -1.61313500 | -3.26798100 | Pre_TS <sup>d</sup> |             |             |             | 1 | -2.24756700 | -1.26445200 | -0.87979700 |
| 6 | 2.47455000  | 0.84322100  | -1.08997000 | 27                  | 0.06812800  | -1.30026500 | 0.46973200  | 1 | -2.94015900 | -0.37629100 | -2.23386500 |
| 6 | -0.62060600 | 2.43992300  | -0.01873200 | 7                   | -0.07415600 | 0.77748100  | 0.45934300  | 6 | -4.28344600 | -0.67335100 | -0.55855800 |
| 6 | -2.08980900 | 2.11828700  | -0.33850500 | 1                   | -0.90752800 | 0.65735800  | -0.47440900 | 1 | -4.22490500 | -0.94394900 | 0.50438500  |
| 1 | -2.26405900 | 1.90729800  | -1.40453000 | 7                   | 1.84931800  | -0.92101500 | -0.17156700 | 1 | -4.73975700 | -1.53110600 | -1.06922700 |
| 1 | -2.41072500 | 1.23827500  | 0.23996800  | 7                   | -2.23879300 | 0.83172500  | -0.69398900 | 1 | -4.96551200 | 0.18172900  | -0.66842100 |
| 6 | -3.22295000 | 4.22187300  | -1.05434200 | 6                   | 1.21782800  | 1.31535900  | 0.30883200  | 6 | -2.36077700 | 1.96054300  | -1.63425600 |
| 1 | -3.79119000 | 5.05313300  | -0.61493600 | 6                   | 1.55937900  | 2.65105000  | 0.46904300  | 1 | -1.89849800 | 1.64350400  | -2.58221700 |
| 1 | -3.91617000 | 3.66601100  | -1.70406200 | 1                   | 0.81023400  | 3.36863900  | 0.80452600  | 1 | -1.72271400 | 2.77102400  | -1.24269100 |

|                     |             |             |             |    |             |             |             |      |             |             |             |
|---------------------|-------------|-------------|-------------|----|-------------|-------------|-------------|------|-------------|-------------|-------------|
| 6                   | -3.76707500 | 2.45777600  | -1.87469400 | 1  | 5.11811100  | -2.24589600 | -0.36122300 |      |             |             |             |
| 1                   | -4.38994200 | 1.69766800  | -2.36545800 | 6  | 3.01187400  | -1.87761700 | -0.02705900 | TS   |             |             |             |
| 1                   | -3.75229500 | 3.33821900  | -2.52997500 | 1  | 2.74268600  | -2.93528600 | 0.04758500  | 8    | -1.44758800 | 0.58506300  | -0.13093200 |
| 1                   | -4.26806300 | 2.75366400  | -0.94186500 | 6  | 2.27710700  | 0.33143100  | 0.01699400  | 1    | -0.50755800 | 0.42936300  | -0.94719200 |
| 8                   | -0.76616100 | 2.07066400  | 2.28312000  | 6  | -0.88006100 | 1.28483300  | 1.39595200  | 6    | -2.28794900 | -0.53929900 | 0.00390200  |
| 17                  | -0.18986400 | -3.06351900 | -0.85417300 | 6  | -2.33053700 | 0.89763500  | 1.12366800  | 1    | -1.88171500 | -1.43052700 | -0.50378000 |
| 17                  | -1.63167800 | -1.69437500 | 1.84913200  | 1  | -2.54851600 | -0.02463400 | 1.68219500  | 1    | -2.42087600 | -0.79016600 | 1.06741400  |
|                     |             |             |             | 1  | -3.00592600 | 1.69026000  | 1.47772600  | 1    | -3.26861400 | -0.30440100 | -0.43102800 |
|                     |             |             |             | 6  | -3.26260600 | -0.52736100 | -0.71182300 | 5    | 0.05505200  | 0.37044500  | 0.31586100  |
| Pre_TS <sup>a</sup> |             |             |             | 1  | -2.67925000 | -1.43477500 | -0.50205300 | 1    | 0.52597200  | 0.28563500  | -0.91208300 |
| 27                  | 0.04550100  | -1.47717200 | 0.08376500  | 1  | -3.36010200 | -0.48458000 | -1.80609400 | 1    | 0.51089000  | 1.36907600  | 0.80419600  |
| 7                   | -0.09642400 | 0.73462500  | 0.39306200  | 6  | -4.60532600 | -0.62688800 | -0.02356000 | 1    | 0.23411000  | -0.70235300 | 0.83599700  |
| 1                   | -1.09481100 | 0.49441900  | -0.38415500 | 1  | -4.49400100 | -0.81733400 | 1.05280300  | 7    | 3.11529600  | -0.20129100 | -0.14940200 |
| 7                   | 2.02624500  | -1.00585500 | 0.10648600  | 1  | -5.15938200 | -1.48122800 | -0.43375200 | 1    | 2.90851400  | 0.47201100  | 0.58822000  |
| 7                   | -2.42475300 | 0.63165400  | -0.31912600 | 1  | -5.23617000 | 0.26314900  | -0.14630900 | 1    | 3.00878200  | -1.10829600 | 0.30401000  |
| 6                   | 1.18934800  | 1.24156600  | 0.17942500  | 6  | -2.61375300 | 1.84748500  | -1.13553400 | 1    | 4.11656400  | -0.10823600 | -0.31520100 |
| 6                   | 1.46811400  | 2.60189900  | 0.14933600  | 1  | -2.29183100 | 1.58519000  | -2.15582300 |      |             |             |             |
| 1                   | 0.65409900  | 3.31080700  | 0.30864100  | 1  | -1.88012200 | 2.58408300  | -0.76694000 |      |             |             |             |
| 6                   | 2.77327700  | 3.07966500  | -0.06930100 | 6  | -3.99964700 | 2.44732600  | -1.14799200 | TS32 |             |             |             |
| 1                   | 2.94432600  | 4.15802500  | -0.09215300 | 1  | -4.72590600 | 1.79785800  | -1.65424200 | 27   | 0.19183300  | -0.68263100 | 0.20121700  |
| 6                   | 3.82909300  | 2.21278900  | -0.25238100 | 1  | -3.98765800 | 3.40081200  | -1.69186300 | 7    | 1.72845400  | 0.60786100  | -0.07713400 |
| 1                   | 4.84199000  | 2.58308000  | -0.42342700 | 1  | -4.37508400 | 2.65612100  | -0.13599700 | 7    | -0.57178800 | 0.91011900  | 1.18688800  |
| 6                   | 3.60283000  | 0.81753300  | -0.20493600 | 8  | -0.52631500 | 1.97035300  | 2.32837300  | 7    | 3.73420100  | -2.04421300 | -0.17481200 |
| 6                   | 4.63074900  | -0.14338000 | -0.34798600 | 17 | -0.38463300 | -1.50896500 | -2.11401900 | 6    | 1.45796800  | 1.89521400  | 0.38016200  |
| 1                   | 5.65411600  | 0.19737100  | -0.52552200 | 17 | -1.21914300 | -2.39090000 | 1.65712800  | 6    | 2.26048600  | 3.02811500  | 0.22967700  |
| 6                   | 4.34189400  | -1.48723000 | -0.25711200 |    |             |             |             | 1    | 3.22230700  | 2.93225700  | -0.26839600 |

|   |             |             |             |   |             |             |             |                   |             |             |             |
|---|-------------|-------------|-------------|---|-------------|-------------|-------------|-------------------|-------------|-------------|-------------|
| 6 | 1.83184800  | 4.27627200  | 0.71423000  | 6 | 5.86124000  | -1.60092800 | -1.44617900 | 6                 | -3.36021500 | 1.86303400  | -1.45586700 |
| 1 | 2.48096900  | 5.14449500  | 0.57393800  | 1 | 5.69114300  | -2.49819200 | -2.05979600 | 1                 | -3.17511200 | 0.07643500  | -0.29496000 |
| 6 | 0.62160700  | 4.42528400  | 1.36120800  | 1 | 6.94478800  | -1.50763800 | -1.30544700 | 6                 | -2.87600900 | 2.64667500  | -2.50341600 |
| 1 | 0.29976100  | 5.39874400  | 1.73936300  | 1 | 5.52425100  | -0.71034400 | -1.99043600 | 1                 | -1.36429000 | 2.77872000  | -4.04554100 |
| 6 | -0.22175300 | 3.30430500  | 1.54458700  | 1 | -0.49287800 | -1.98260200 | 0.78732400  | 1                 | -4.22847100 | 2.19826100  | -0.88027500 |
| 6 | -1.47597900 | 3.36976200  | 2.20182000  | 8 | 3.96396100  | 0.90293600  | -0.72994300 | 1                 | -3.35212600 | 3.59577100  | -2.75925200 |
| 1 | -1.82858800 | 4.32931100  | 2.58827600  | 6 | -1.17248000 | -2.03758200 | -0.46313000 | 1                 | 3.68778800  | -2.99462300 | -0.55837600 |
| 6 | -2.22735800 | 2.22185000  | 2.34075800  | 6 | -0.88295500 | -1.03497600 | -1.49869100 |                   |             |             |             |
| 1 | -3.19866700 | 2.23590900  | 2.83879200  | 1 | -0.22367400 | -1.37413100 | -2.31063600 |                   |             |             |             |
| 6 | -1.74081300 | 1.01535100  | 1.81630300  | 1 | -0.71883800 | -3.00271500 | -0.75743000 | TS32 <sup>S</sup> |             |             |             |
| 1 | -2.32619400 | 0.09472900  | 1.90484300  | 6 | -2.57131400 | -2.32495500 | 0.01261700  | 27                | 0.08215400  | -0.65236000 | -0.60607800 |
| 6 | 0.19828300  | 2.03440400  | 1.04999100  | 6 | -2.89951200 | -2.45111800 | 1.36660700  | 7                 | -1.43811000 | 0.49660400  | -0.00081700 |
| 6 | 2.90435400  | 0.26714200  | -0.61616500 | 6 | -3.58432700 | -2.52458300 | -0.93673100 | 7                 | 0.62268400  | 0.92662400  | -1.49871800 |
| 6 | 2.92390100  | -1.17800800 | -1.11343600 | 6 | -4.19946700 | -2.76323100 | 1.76657400  | 7                 | -3.47787200 | -1.84811000 | -0.85629600 |
| 1 | 1.92116000  | -1.63073200 | -1.16026600 | 1 | -2.11509900 | -2.29220000 | 2.11466700  | 6                 | -1.07754000 | 1.83943300  | -0.10619700 |
| 1 | 3.39861700  | -1.24140500 | -2.10061800 | 6 | -4.88232500 | -2.83452600 | -0.54206800 | 6                 | -1.66989100 | 2.94143700  | 0.51240500  |
| 6 | 3.10094200  | -2.09434400 | 1.19189900  | 1 | -3.34154800 | -2.40768900 | -1.99698000 | 1                 | -2.54338400 | 2.79608100  | 1.14254400  |
| 1 | 2.00088500  | -2.04629900 | 1.02110300  | 6 | -5.19757700 | -2.95339400 | 0.81295400  | 6                 | -1.12477700 | 4.22535800  | 0.33159400  |
| 1 | 3.36639700  | -1.14796600 | 1.68283400  | 1 | -4.43383600 | -2.85246900 | 2.83063200  | 1                 | -1.59581900 | 5.06974300  | 0.84180100  |
| 6 | 3.51120100  | -3.30285300 | 1.98406700  | 1 | -5.65894400 | -2.97580900 | -1.29800100 | 6                 | -0.02089900 | 4.44483700  | -0.46859200 |
| 1 | 3.26662500  | -4.23973500 | 1.46176100  | 1 | -6.21878300 | -3.18814100 | 1.12274800  | 1                 | 0.38900800  | 5.44920700  | -0.60053300 |
| 1 | 2.95191700  | -3.31539100 | 2.92734200  | 6 | -1.62346100 | 0.17226400  | -1.81913000 | 6                 | 0.60052900  | 3.35677000  | -1.12819400 |
| 1 | 4.57830200  | -3.31911200 | 2.24481200  | 6 | -1.16139400 | 0.98188700  | -2.88740800 | 6                 | 1.73244000  | 3.48227900  | -1.97306600 |
| 6 | 5.19779600  | -1.68187900 | -0.10012100 | 6 | -2.75953200 | 0.65272600  | -1.12206400 | 1                 | 2.17048800  | 4.46769100  | -2.14747600 |
| 1 | 5.65494700  | -2.44753100 | 0.54224600  | 6 | -1.76641900 | 2.18592300  | -3.21881000 | 6                 | 2.25286400  | 2.34788300  | -2.56579800 |
| 1 | 5.24112000  | -0.71454900 | 0.41521100  | 1 | -0.28158300 | 0.64881100  | -3.44883300 | 1                 | 3.11586700  | 2.40467000  | -3.23217900 |

|   |             |             |             |   |             |             |             |      |             |             |             |
|---|-------------|-------------|-------------|---|-------------|-------------|-------------|------|-------------|-------------|-------------|
| 6 | 1.67432100  | 1.09843400  | -2.31594800 | 1 | 1.31411600  | -3.07496800 | -0.62018500 | TS33 |             |             |             |
| 1 | 2.06953300  | 0.19659800  | -2.78622200 | 6 | 2.87698500  | -1.72960200 | -0.10793800 | 27   | 0.44883700  | -0.19486100 | 0.08945000  |
| 6 | 0.06681000  | 2.05383600  | -0.92661400 | 6 | 3.62696100  | -1.56332400 | -1.28178400 | 7    | -0.13925900 | 1.69220900  | 0.65344100  |
| 6 | -2.64780000 | 0.13843500  | 0.45773400  | 6 | 3.55554100  | -1.67068700 | 1.11746900  | 7    | 2.06109500  | 0.84973500  | -0.54484600 |
| 6 | -2.87262200 | -1.37294300 | 0.45717400  | 6 | 4.99621300  | -1.31649600 | -1.23893200 | 7    | -3.29699400 | 0.72651900  | 0.07567600  |
| 1 | -1.93242500 | -1.92644800 | 0.57910000  | 1 | 3.12050900  | -1.64400800 | -2.24925000 | 6    | 0.82947800  | 2.66252500  | 0.43150100  |
| 1 | -3.58904900 | -1.63998500 | 1.24401500  | 6 | 4.92564600  | -1.41816700 | 1.16498100  | 6    | 0.76472100  | 4.01478700  | 0.77371400  |
| 6 | -2.44300300 | -2.00031700 | -1.94269200 | 1 | 2.99924100  | -1.82817100 | 2.04423300  | 1    | -0.13652300 | 4.39543500  | 1.24866100  |
| 1 | -1.72847700 | -1.15050100 | -1.83387800 | 6 | 5.65234900  | -1.23289500 | -0.01041800 | 6    | 1.84618300  | 4.87382100  | 0.50603300  |
| 1 | -2.97475500 | -1.91370200 | -2.90014100 | 1 | 5.55574800  | -1.19106600 | -2.16954000 | 1    | 1.76341200  | 5.92540600  | 0.79291900  |
| 6 | -1.70308200 | -3.30205600 | -1.81858700 | 1 | 5.43055300  | -1.37060300 | 2.13313600  | 6    | 2.99567000  | 4.42310600  | -0.10898600 |
| 1 | -1.14615700 | -3.35651100 | -0.87144000 | 1 | 6.72561800  | -1.03262400 | 0.02939600  | 1    | 3.82855600  | 5.09935300  | -0.31645500 |
| 1 | -0.95516800 | -3.36810900 | -2.61882400 | 6 | 0.49069900  | -0.90145900 | 1.98238500  | 6    | 3.10538200  | 3.06199500  | -0.48299700 |
| 1 | -2.36380600 | -4.17869000 | -1.90727700 | 6 | -0.36875600 | -1.06091000 | 3.08871900  | 6    | 4.24377500  | 2.52050700  | -1.12920500 |
| 6 | -4.65832700 | -1.03042100 | -1.30547800 | 6 | 1.22853300  | 0.30393200  | 1.91276300  | 1    | 5.09264200  | 3.17148400  | -1.35344700 |
| 1 | -4.96820700 | -1.46957200 | -2.26504600 | 6 | -0.52372200 | -0.05945000 | 4.04519600  | 6    | 4.25868500  | 1.18299100  | -1.46468800 |
| 1 | -4.27790300 | -0.01914300 | -1.50397100 | 1 | -0.94281400 | -1.99003500 | 3.17979000  | 1    | 5.11960200  | 0.73106400  | -1.96054800 |
| 6 | -5.77613700 | -1.02097400 | -0.30002700 | 6 | 1.07561200  | 1.29850800  | 2.87112400  | 6    | 3.14707400  | 0.38381100  | -1.15773300 |
| 1 | -6.09191900 | -2.03846100 | -0.02345800 | 1 | 1.90520500  | 0.47328500  | 1.07089500  | 1    | 3.14372000  | -0.68197500 | -1.40174500 |
| 1 | -6.64803100 | -0.52096600 | -0.73864600 | 6 | 0.19218500  | 1.13204300  | 3.94166400  | 6    | 2.02036200  | 2.17855600  | -0.20662900 |
| 1 | -5.48898600 | -0.45788200 | 0.59629900  | 1 | -1.21325500 | -0.21229300 | 4.88005900  | 6    | -1.38265800 | 1.99180700  | 1.05536000  |
| 1 | 0.95717300  | -1.52158600 | -1.45831200 | 1 | 1.64321100  | 2.22778100  | 2.76948300  | 6    | -2.25714500 | 0.74541500  | 1.17534800  |
| 8 | -3.59435700 | 0.85438600  | 0.81014600  | 1 | 0.06590000  | 1.92221300  | 4.68504600  | 1    | -1.67560700 | -0.18126600 | 1.08860100  |
| 6 | 1.41727700  | -2.06034500 | -0.18677700 | 1 | -3.84150600 | -2.78896100 | -0.66848200 | 1    | -2.79759600 | 0.73683000  | 2.13054300  |
| 6 | 0.44945200  | -1.88574900 | 0.89760300  |   |             |             |             | 6    | -2.70047600 | 1.16874200  | -1.23768500 |
| 1 | -0.13788600 | -2.78452100 | 1.15021400  |   |             |             |             | 1    | -1.75501200 | 0.59851400  | -1.31823100 |

|   |             |             |             |                   |             |             |             |   |             |             |             |
|---|-------------|-------------|-------------|-------------------|-------------|-------------|-------------|---|-------------|-------------|-------------|
| 1 | -2.43357400 | 2.22590400  | -1.10513700 | 1                 | -4.27599000 | -2.51223400 | -2.58543300 | 1 | -1.71487500 | 5.58343300  | 0.84155300  |
| 6 | -3.61144500 | 0.95964100  | -2.41593000 | 1                 | -4.10134300 | -3.01098100 | 1.69310400  | 6 | -2.97951700 | 4.09783900  | -0.04163800 |
| 1 | -4.01921600 | -0.05976100 | -2.45127200 | 1                 | -5.44089500 | -2.94010300 | -0.41492400 | 1 | -3.86859100 | 4.73306300  | -0.05411900 |
| 1 | -3.03080200 | 1.10380200  | -3.33565500 | 6                 | 2.10127500  | -2.67314700 | 0.59228700  | 6 | -3.07164900 | 2.77669900  | -0.54410200 |
| 1 | -4.44679600 | 1.67154600  | -2.45623500 | 6                 | 2.79835100  | -2.87980000 | 1.80601400  | 6 | -4.25171700 | 2.21782500  | -1.09559000 |
| 6 | -4.51768800 | 1.51341200  | 0.46164900  | 6                 | 2.79841600  | -3.00641100 | -0.59173300 | 1 | -5.16394900 | 2.81753400  | -1.13793100 |
| 1 | -5.07211300 | 1.71655500  | -0.46297000 | 6                 | 4.09483500  | -3.37533000 | 1.83498600  | 6 | -4.21826900 | 0.92541400  | -1.58223300 |
| 1 | -4.13038700 | 2.46737200  | 0.84884400  | 1                 | 2.29306900  | -2.63537800 | 2.74583300  | 1 | -5.10178800 | 0.46628500  | -2.02985400 |
| 6 | -5.38071000 | 0.77365500  | 1.44821300  | 6                 | 4.09770100  | -3.50729600 | -0.56082700 | 6 | -3.03812300 | 0.17780100  | -1.50083500 |
| 1 | -5.73695000 | -0.18427000 | 1.04159200  | 1                 | 2.31051700  | -2.87705900 | -1.56274500 | 1 | -3.00020100 | -0.84646500 | -1.87479800 |
| 1 | -6.26341800 | 1.37778600  | 1.68939100  | 6                 | 4.76421900  | -3.69524800 | 0.64972800  | 6 | -1.91135400 | 1.95491300  | -0.49960900 |
| 1 | -4.86489700 | 0.56945000  | 2.39588500  | 1                 | 4.59353000  | -3.51716200 | 2.79802200  | 6 | 1.64716700  | 1.89623800  | 0.04679100  |
| 1 | 0.32638500  | -2.54115800 | -1.48224300 | 1                 | 4.59599000  | -3.75763700 | -1.50211400 | 6 | 2.60845700  | 0.82805600  | -0.44760900 |
| 8 | -1.92521600 | 3.08721700  | 1.26104200  | 1                 | 5.78415400  | -4.08501300 | 0.67140800  | 1 | 2.08292600  | -0.10476500 | -0.67309500 |
| 6 | -0.08881600 | -2.04873400 | -0.58784900 | 1                 | -3.57594300 | -0.26100900 | -0.04590000 | 1 | 3.12363200  | 1.16860100  | -1.35596700 |
| 6 | 0.74695500  | -2.14283100 | 0.61437400  |                   |             |             |             | 6 | 3.04629000  | 0.31839600  | 1.92923200  |
| 1 | 0.23573600  | -2.29786600 | 1.57261000  |                   |             |             |             | 1 | 2.09292900  | -0.20098100 | 1.74124200  |
| 1 | -0.14487200 | -0.77938000 | -1.28225300 | TS33 <sup>S</sup> |             |             |             | 1 | 2.79508900  | 1.32425500  | 2.29158400  |
| 6 | -1.55839600 | -2.32892900 | -0.50035200 | 27                | -0.42361900 | -0.32391900 | -0.32419500 | 6 | 3.93179500  | -0.45016000 | 2.87175400  |
| 6 | -2.33453500 | -2.28788600 | -1.67289500 | 7                 | 0.36974500  | 1.52908800  | -0.11042100 | 1 | 4.21350600  | -1.43096300 | 2.46137400  |
| 6 | -2.22806500 | -2.60373500 | 0.70430400  | 7                 | -1.91401200 | 0.65098000  | -0.94449200 | 1 | 3.39246700  | -0.63466900 | 3.80862200  |
| 6 | -3.70898900 | -2.51929700 | -1.65035900 | 7                 | 3.66725100  | 0.50866000  | 0.57487700  | 1 | 4.85161300  | 0.08829600  | 3.13677000  |
| 1 | -1.83502200 | -2.06992900 | -2.62327900 | 6                 | -0.66919500 | 2.45114300  | -0.00374200 | 6 | 4.79724600  | 1.49812600  | 0.57362600  |
| 6 | -3.61128400 | -2.79995700 | 0.73846600  | 6                 | -0.62049400 | 3.76287000  | 0.47268200  | 1 | 5.32632200  | 1.38153600  | 1.52880700  |
| 1 | -1.65852500 | -2.67459300 | 1.63296300  | 1                 | 0.31936100  | 4.15594900  | 0.85178000  | 1 | 4.31019700  | 2.48380500  | 0.56754000  |
| 6 | -4.36330800 | -2.75941300 | -0.43796900 | 6                 | -1.77832400 | 4.56309100  | 0.45404700  | 6 | 5.72812700  | 1.27796400  | -0.58847600 |

|   |             |             |             |              |             |             |             |                |             |             |             |
|---|-------------|-------------|-------------|--------------|-------------|-------------|-------------|----------------|-------------|-------------|-------------|
| 1 | 6.54334500  | 2.01036600  | -0.55293900 | 1            | -1.72491600 | -1.26898800 | 2.18943300  | 6              | -2.47846600 | 1.10550700  | 0.00005700  |
| 1 | 5.22820300  | 1.40225600  | -1.55832200 | 6            | -4.89262100 | -2.46291900 | 1.79792500  | 6              | -4.20197800 | -1.08415200 | -0.00003000 |
| 1 | 6.18431900  | 0.27686300  | -0.56951900 | 1            | -5.62086200 | -3.47408900 | 0.03339200  | 1              | -2.41893500 | -2.29514500 | 0.00005600  |
| 1 | 0.15645900  | -2.61646400 | 1.35684500  | 1            | -3.86855900 | -1.43587200 | 3.39927000  | 6              | -3.85368900 | 1.30054200  | -0.00000800 |
| 8 | 2.13277100  | 2.95117500  | 0.49087500  | 1            | -5.84588200 | -2.51784600 | 2.32858800  | 1              | -1.81698800 | 1.97486200  | 0.00012900  |
| 6 | 0.11134700  | -2.13805300 | 0.36073700  | 1            | 4.03519400  | -0.41433800 | 0.29370100  | 6              | -4.72492700 | 0.20805800  | -0.00005700 |
| 6 | -1.17797300 | -2.15059500 | -0.34114700 |              |             |             |             | 1              | -4.87227100 | -1.94685800 | -0.00005800 |
| 1 | -1.18810800 | -2.67470500 | -1.30836000 |              |             |             |             | 1              | -4.25438000 | 2.31706000  | -0.00001100 |
| 1 | 0.22254300  | -0.93380400 | 0.94906600  |              |             |             |             | 1              | -5.80564100 | 0.36622600  | -0.00010600 |
| 6 | 1.34987600  | -2.35115400 | -0.42433600 | (E)-stilbene |             |             |             |                |             |             |             |
| 6 | 2.56922500  | -2.60182400 | 0.23789900  | 6            | 0.49816300  | 0.45706400  | -0.00008900 |                |             |             |             |
| 6 | 1.39067300  | -2.16970700 | -1.82556500 | 6            | -0.49810000 | -0.45606400 | 0.00011700  | H <sub>2</sub> |             |             |             |
| 6 | 3.78468500  | -2.61885300 | -0.45409000 | 1            | 0.23258700  | 1.52053800  | -0.00028000 |                |             |             |             |
| 1 | 2.54965800  | -2.79377100 | 1.31642400  | 1            | -0.23228200 | -1.51950200 | 0.00031200  | 1              | 0.00000000  | 0.00000000  | 0.37724500  |
| 6 | 2.60382100  | -2.17501700 | -2.50999400 | 6            | 1.92983500  | 0.19284100  | -0.00005200 | 1              | 0.00000000  | 0.00000000  | -0.37724500 |
| 1 | 0.46115200  | -2.00635400 | -2.37351800 | 6            | 2.82476700  | 1.27932900  | -0.00001200 |                |             |             |             |
| 6 | 3.81275500  | -2.37872800 | -1.83130700 | 6            | 2.47794500  | -1.10525800 | -0.00007300 |                |             |             |             |
| 1 | 4.71263900  | -2.84907500 | 0.08155700  | 6            | 4.20246600  | 1.08360800  | 0.00003600  |                |             |             |             |
| 1 | 2.60927000  | -2.01919900 | -3.59157100 | 1            | 2.41997400  | 2.29543700  | -0.00000700 |                |             |             |             |
| 1 | 4.75878900  | -2.39333100 | -2.37796800 | 6            | 3.85307800  | -1.30093800 | -0.00002400 |                |             |             |             |
| 6 | -2.42106600 | -2.30331100 | 0.41749000  | 1            | 1.81601200  | -1.97427100 | -0.00015000 |                |             |             |             |
| 6 | -3.54850300 | -2.91791700 | -0.16003100 | 6            | 4.72481200  | -0.20884700 | 0.00003600  |                |             |             |             |
| 6 | -2.57108800 | -1.77852100 | 1.71765700  | 1            | 4.87316800  | 1.94599700  | 0.00007600  |                |             |             |             |
| 6 | -4.76454200 | -2.99335800 | 0.51435400  | 1            | 4.25330600  | -2.31763900 | -0.00004200 |                |             |             |             |
| 1 | -3.45905900 | -3.34036700 | -1.16649600 | 1            | 5.80545300  | -0.36751100 | 0.00007100  |                |             |             |             |
| 6 | -3.78338600 | -1.85973600 | 2.39501300  | 6            | -1.92971500 | -0.19233500 | 0.00006500  |                |             |             |             |
|   |             |             |             | 6            | -2.82419000 | -1.27922000 | 0.00003600  |                |             |             |             |
